# Supplementary material for: Nitropyridines as 2π-Partners in 1,3-Dipolar Cycloadditions with N-Methyl Azomethine Ylide: An Easy Access to Condensed Pyrrolines
Source: MDPI journal article supplement (doi:10.3390/molecules26185547), 2021-09-13

## Table of contents

|                                    |         |
|------------------------------------|---------|
| NMR and HRMS spectra for <b>2a</b> | S2-S4   |
| NMR and HRMS spectra for <b>2b</b> | S5-S8   |
| NMR and HRMS spectra for <b>2c</b> | S9-S11  |
| NMR and HRMS spectra for <b>2d</b> | S12-S14 |
| NMR and HRMS spectra for <b>2e</b> | S15-S17 |
| NMR and HRMS spectra for <b>2f</b> | S18-S20 |
| NMR and HRMS spectra for <b>2g</b> | S21-S23 |
| NMR and HRMS spectra for <b>2h</b> | S24-S26 |
| NMR and HRMS spectra for <b>2i</b> | S27-S29 |
| NMR and HRMS spectra for <b>2j</b> | S30-S32 |
| NMR and HRMS spectra for <b>2k</b> | S33-S35 |
| NMR and HRMS spectra for <b>2l</b> | S36-S38 |
| NMR and HRMS spectra for <b>2m</b> | S39-S42 |
| NMR and HRMS spectra for <b>2n</b> | S43-S45 |
| NMR and HRMS spectra for <b>2o</b> | S46-S48 |
| NMR and HRMS spectra for <b>2p</b> | S49-S52 |
| NMR and HRMS spectra for <b>2q</b> | S53-S55 |
| NMR and HRMS spectra for <b>4a</b> | S56-S58 |
| NMR and HRMS spectra for <b>4b</b> | S59-S61 |
| NMR and HRMS spectra for <b>4c</b> | S62-S64 |
| NMR and HRMS spectra for <b>4d</b> | S65-S67 |
| NMR and HRMS spectra for <b>4e</b> | S68-S70 |
| NMR and HRMS spectra for <b>4f</b> | S71-S73 |
| NMR and HRMS spectra for <b>4g</b> | S74-S76 |
| NMR and HRMS spectra for <b>4h</b> | S77-S79 |
| NMR and HRMS spectra for <b>4i</b> | S80-S82 |
| NMR and HRMS spectra for <b>4j</b> | S83-S85 |
| NMR and HRMS spectra for <b>5</b>  | S86-S92 |

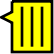

/LPIK AF-363

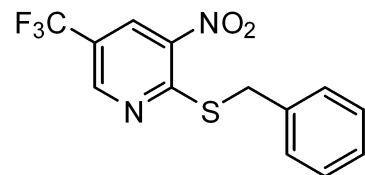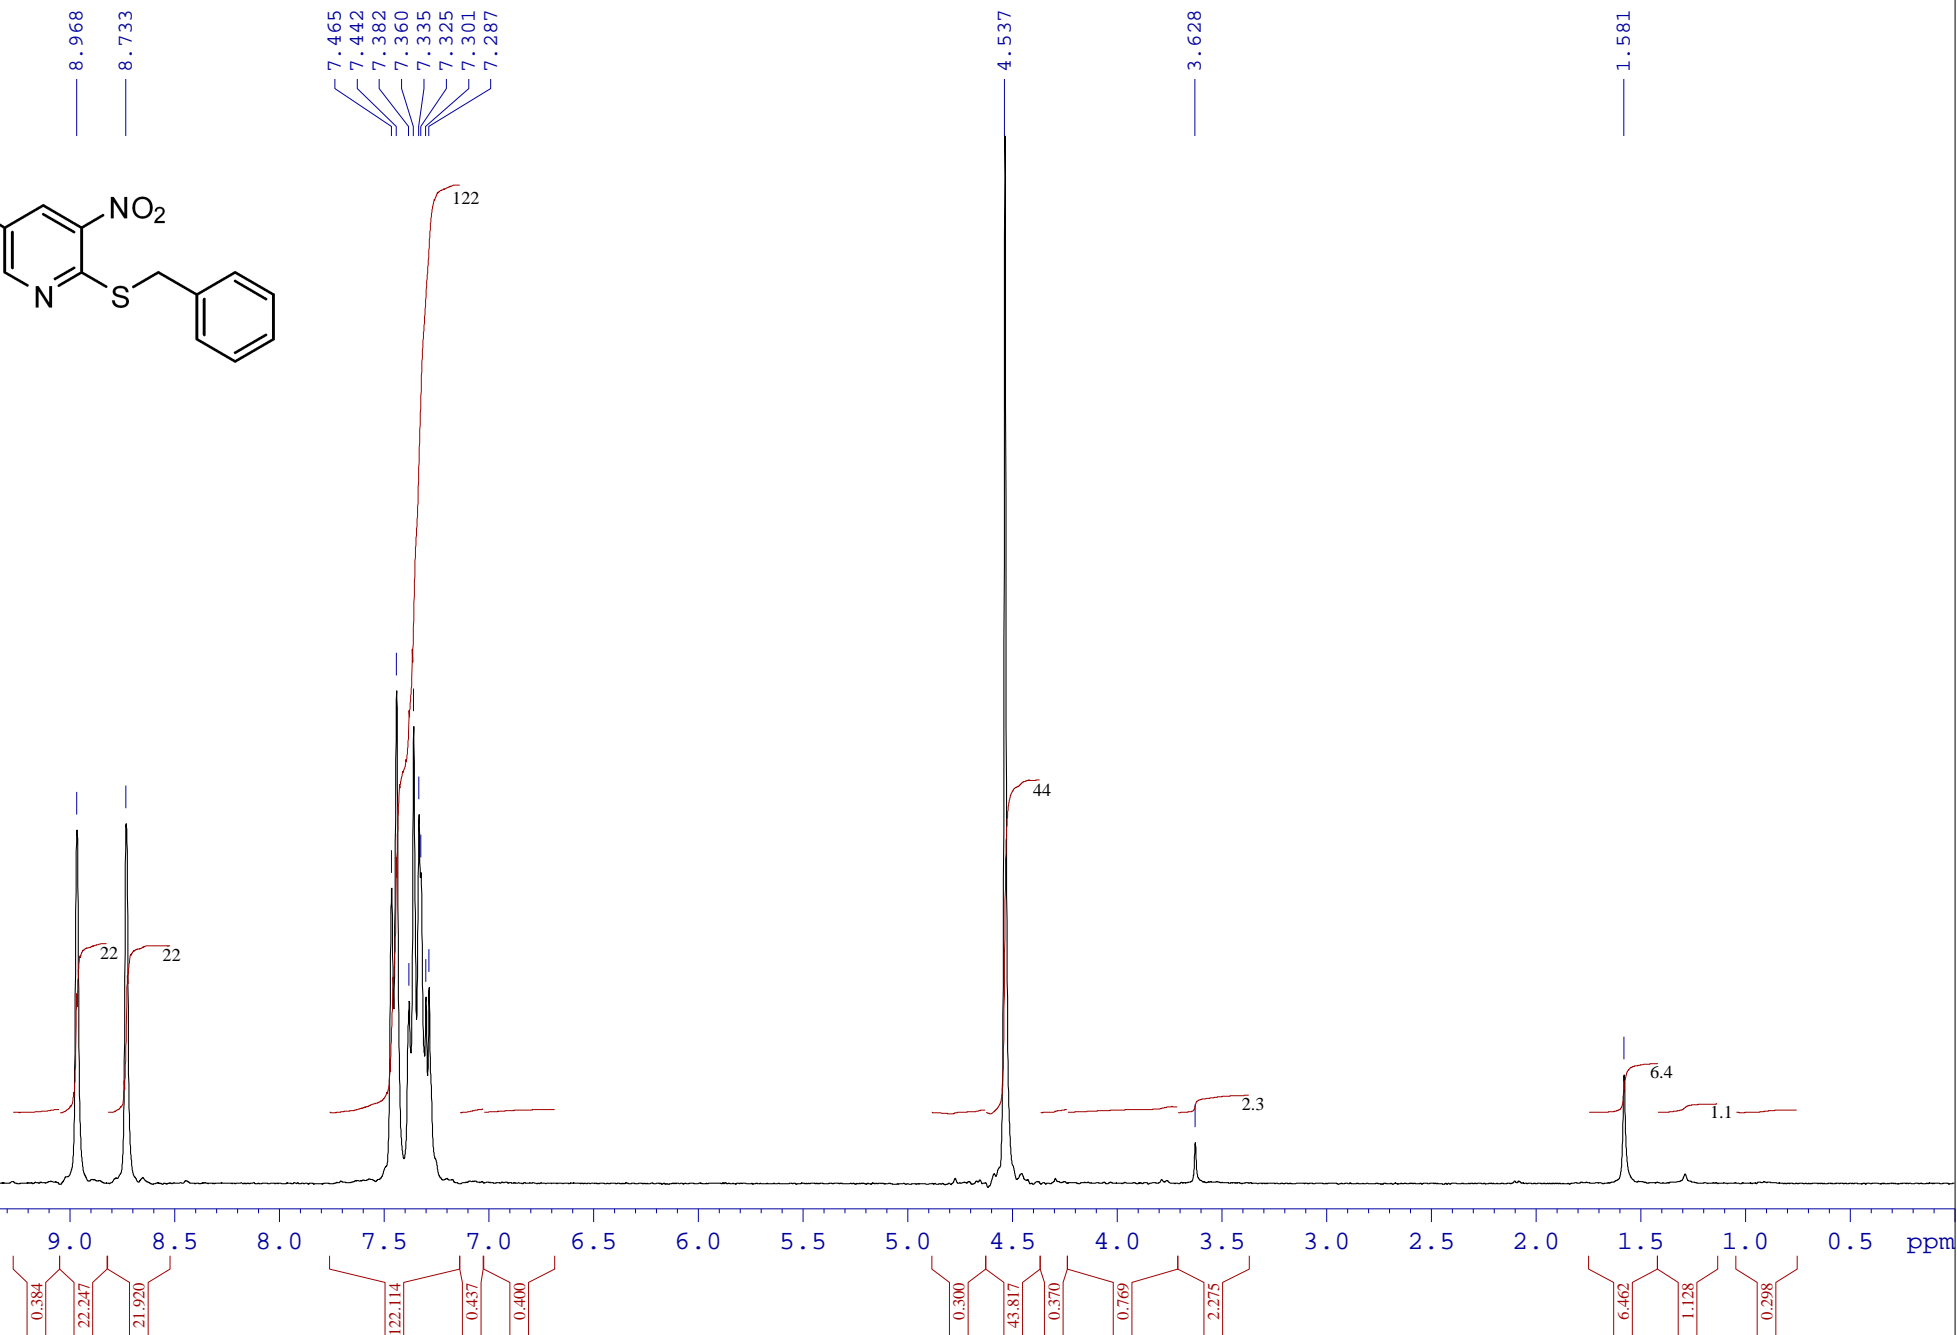

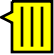

# /LPIK AF-363.13 Kokorekin-20259

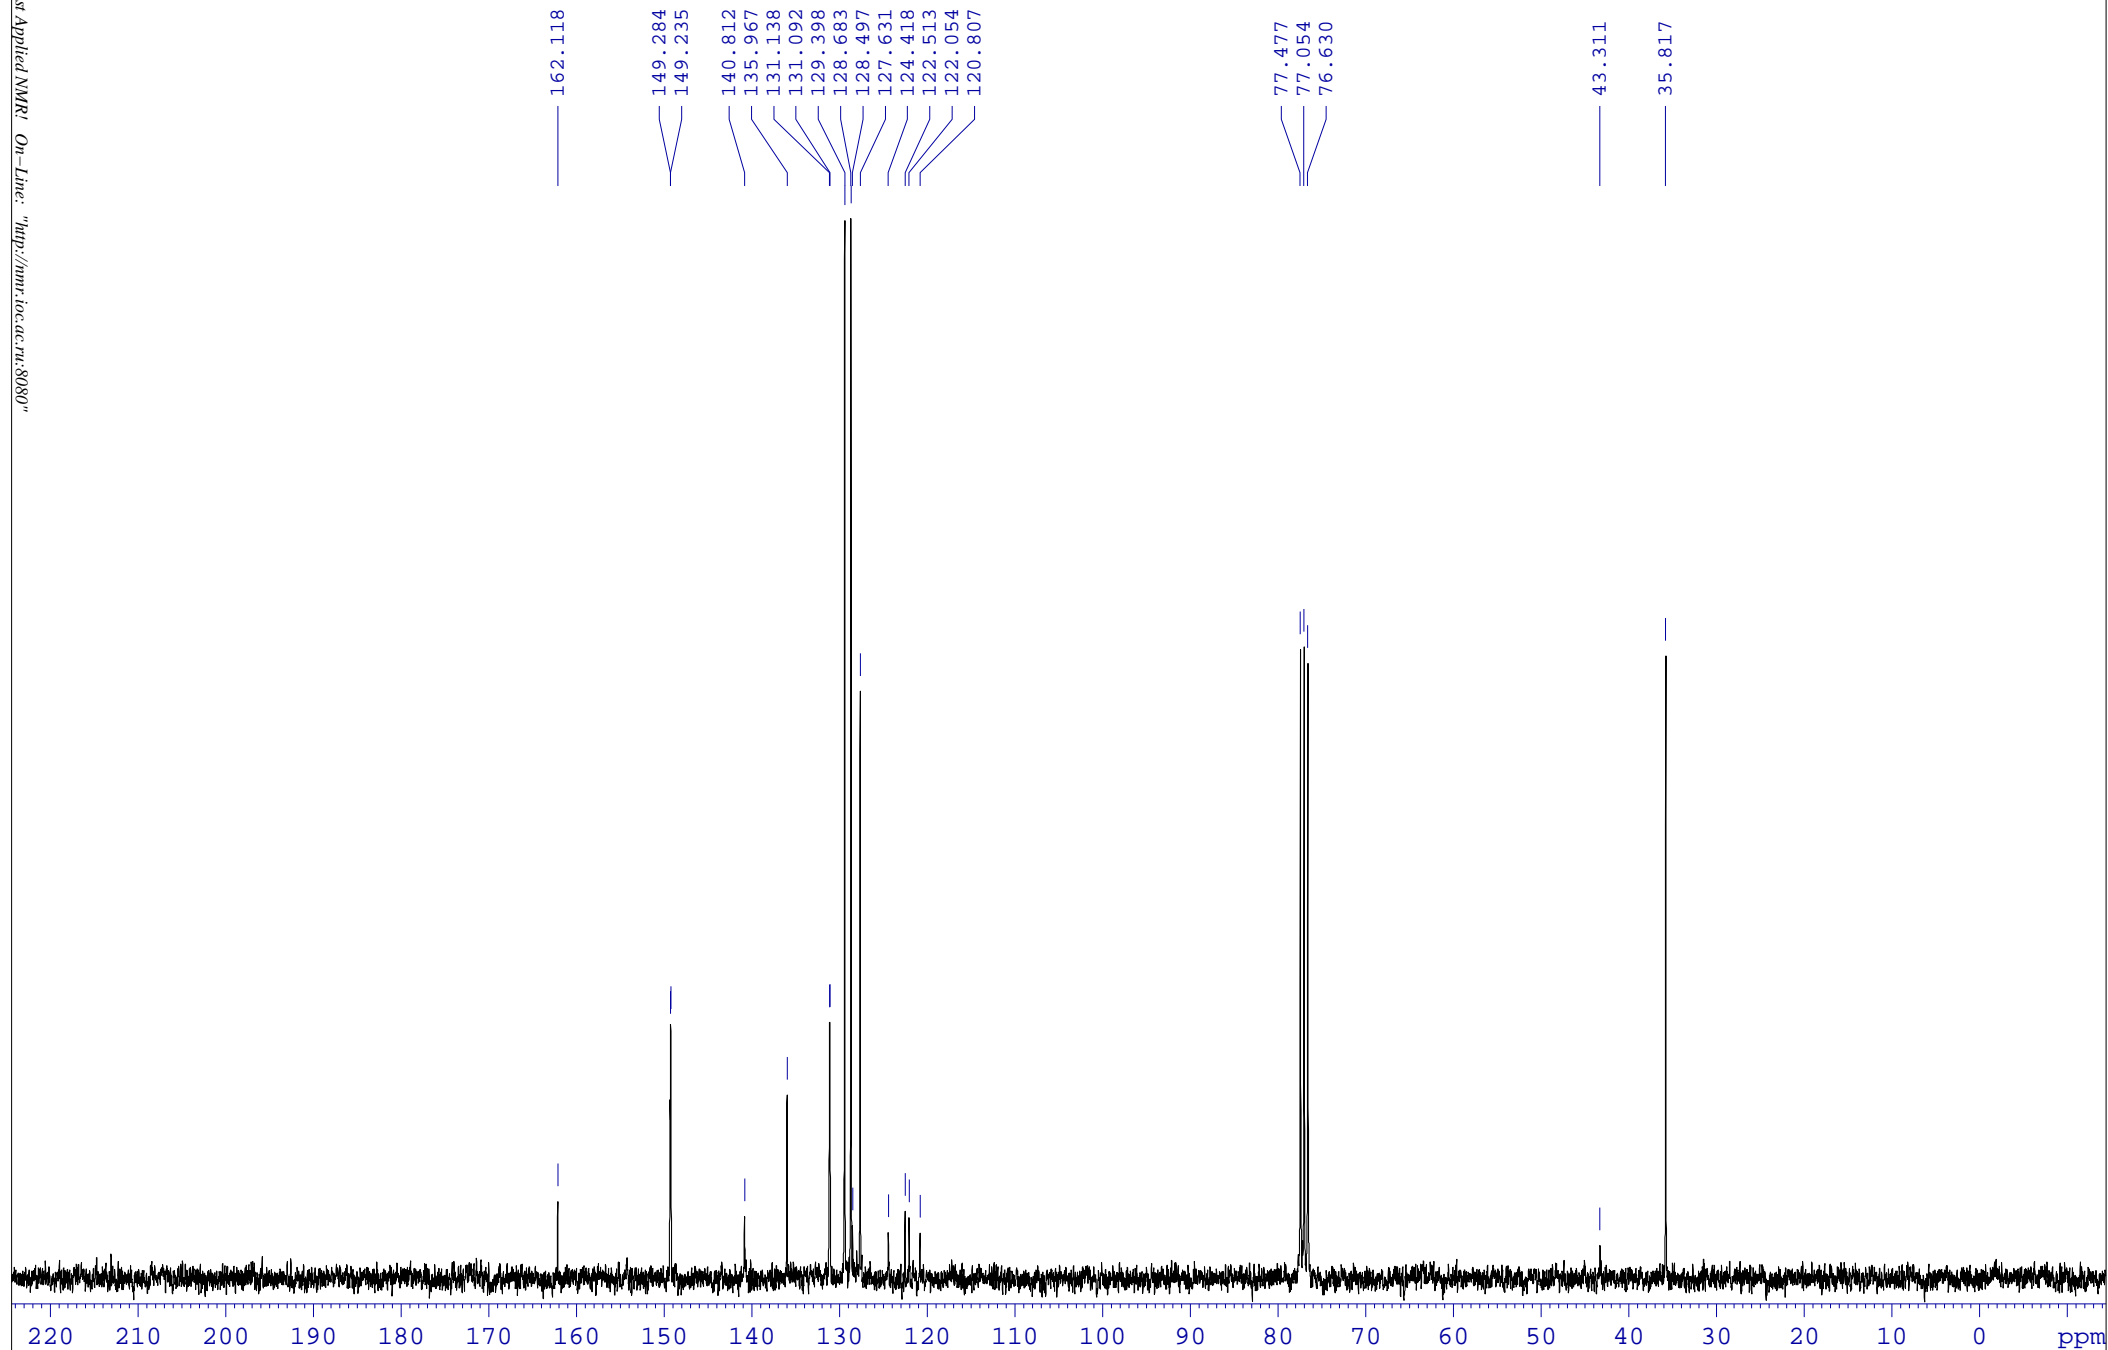

# Display Report

## Analysis Info

Analysis Name D:\Data\Kolotyrkina\2021\Bastrakov\0210024.d  
Method tune\_50-1600.m  
Sample Name /LPIK AF-363  
Comment C13H9F3N2O2S mH 315.0409 calibrant added CH3OH

Acquisition Date 10.02.2021 20:12:35

Operator BDAL@DE  
Instrument / Ser# micrOTOF 10248

## Acquisition Parameter

|             |            |                      |          |                  |           |
|-------------|------------|----------------------|----------|------------------|-----------|
| Source Type | ESI        | Ion Polarity         | Positive | Set Nebulizer    | 1.0 Bar   |
| Focus       | Not active |                      |          | Set Dry Heater   | 200 °C    |
| Scan Begin  | 50 m/z     | Set Capillary        | 4500 V   | Set Dry Gas      | 4.0 l/min |
| Scan End    | 1600 m/z   | Set End Plate Offset | -500 V   | Set Divert Valve | Waste     |

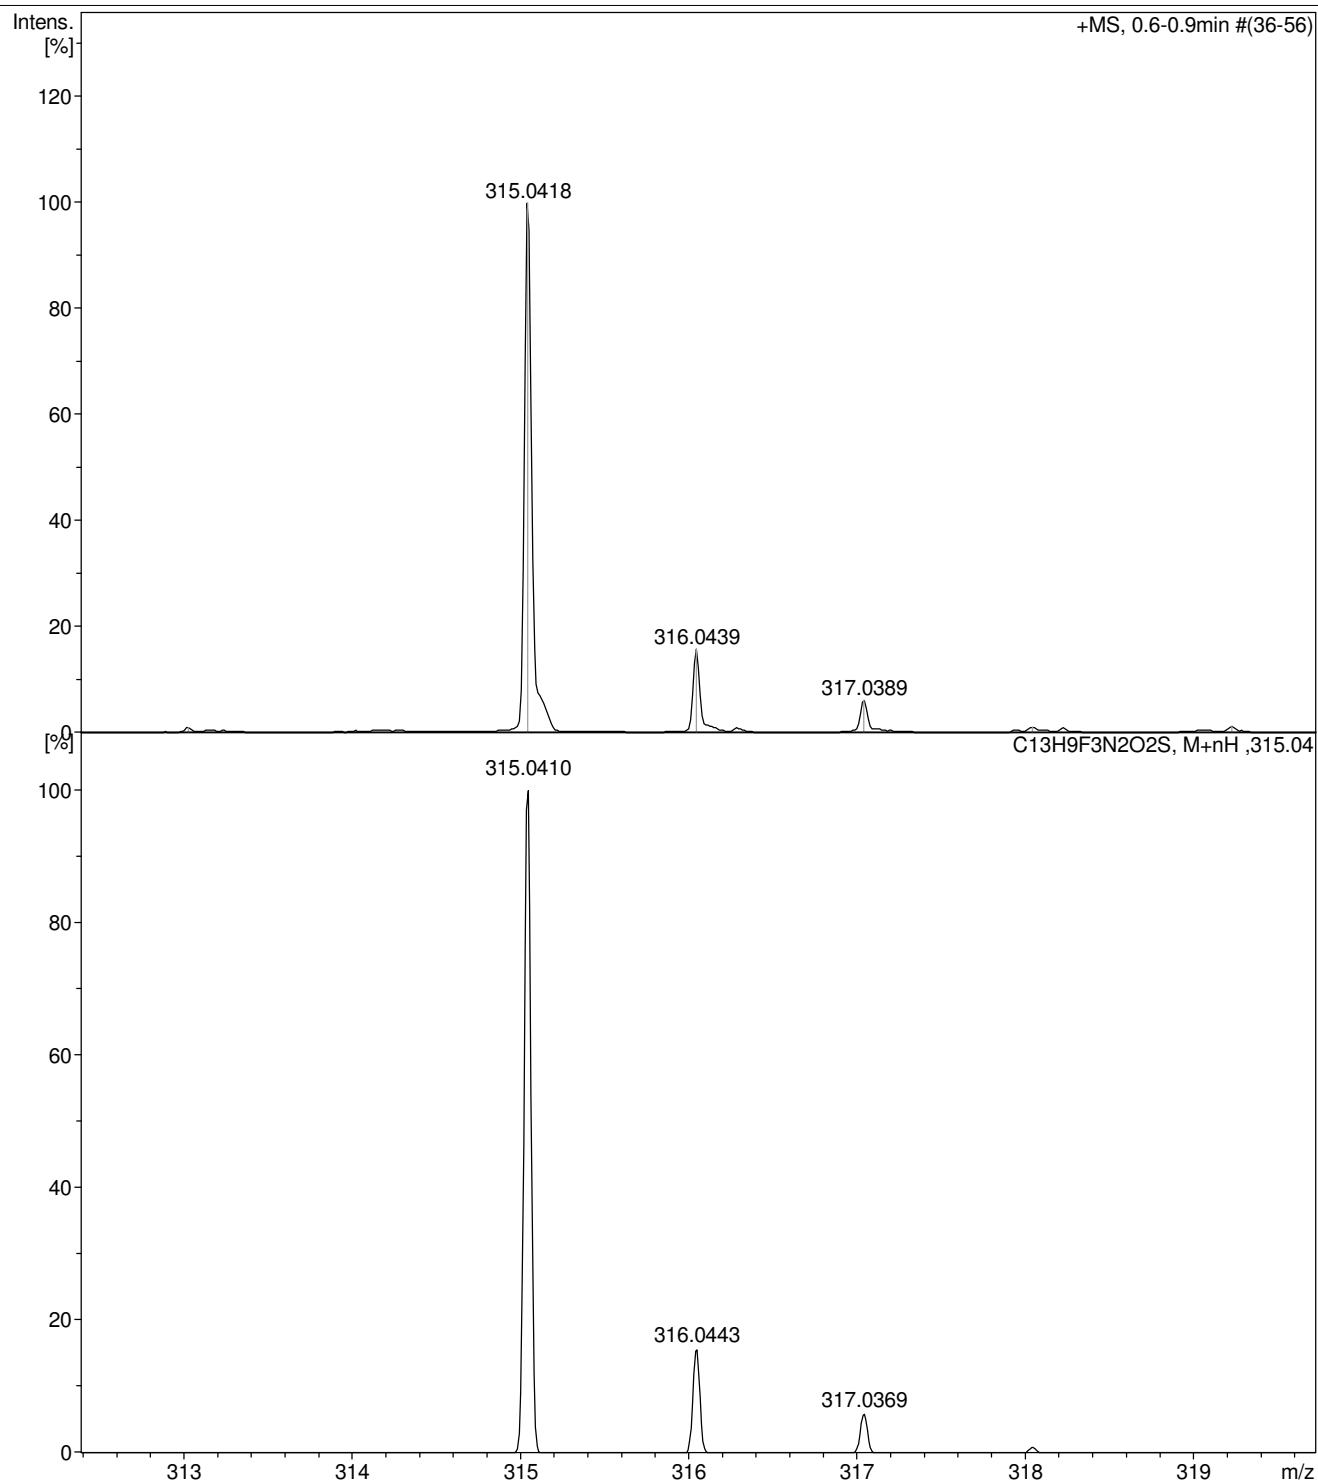

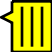

/LPIK AF-364

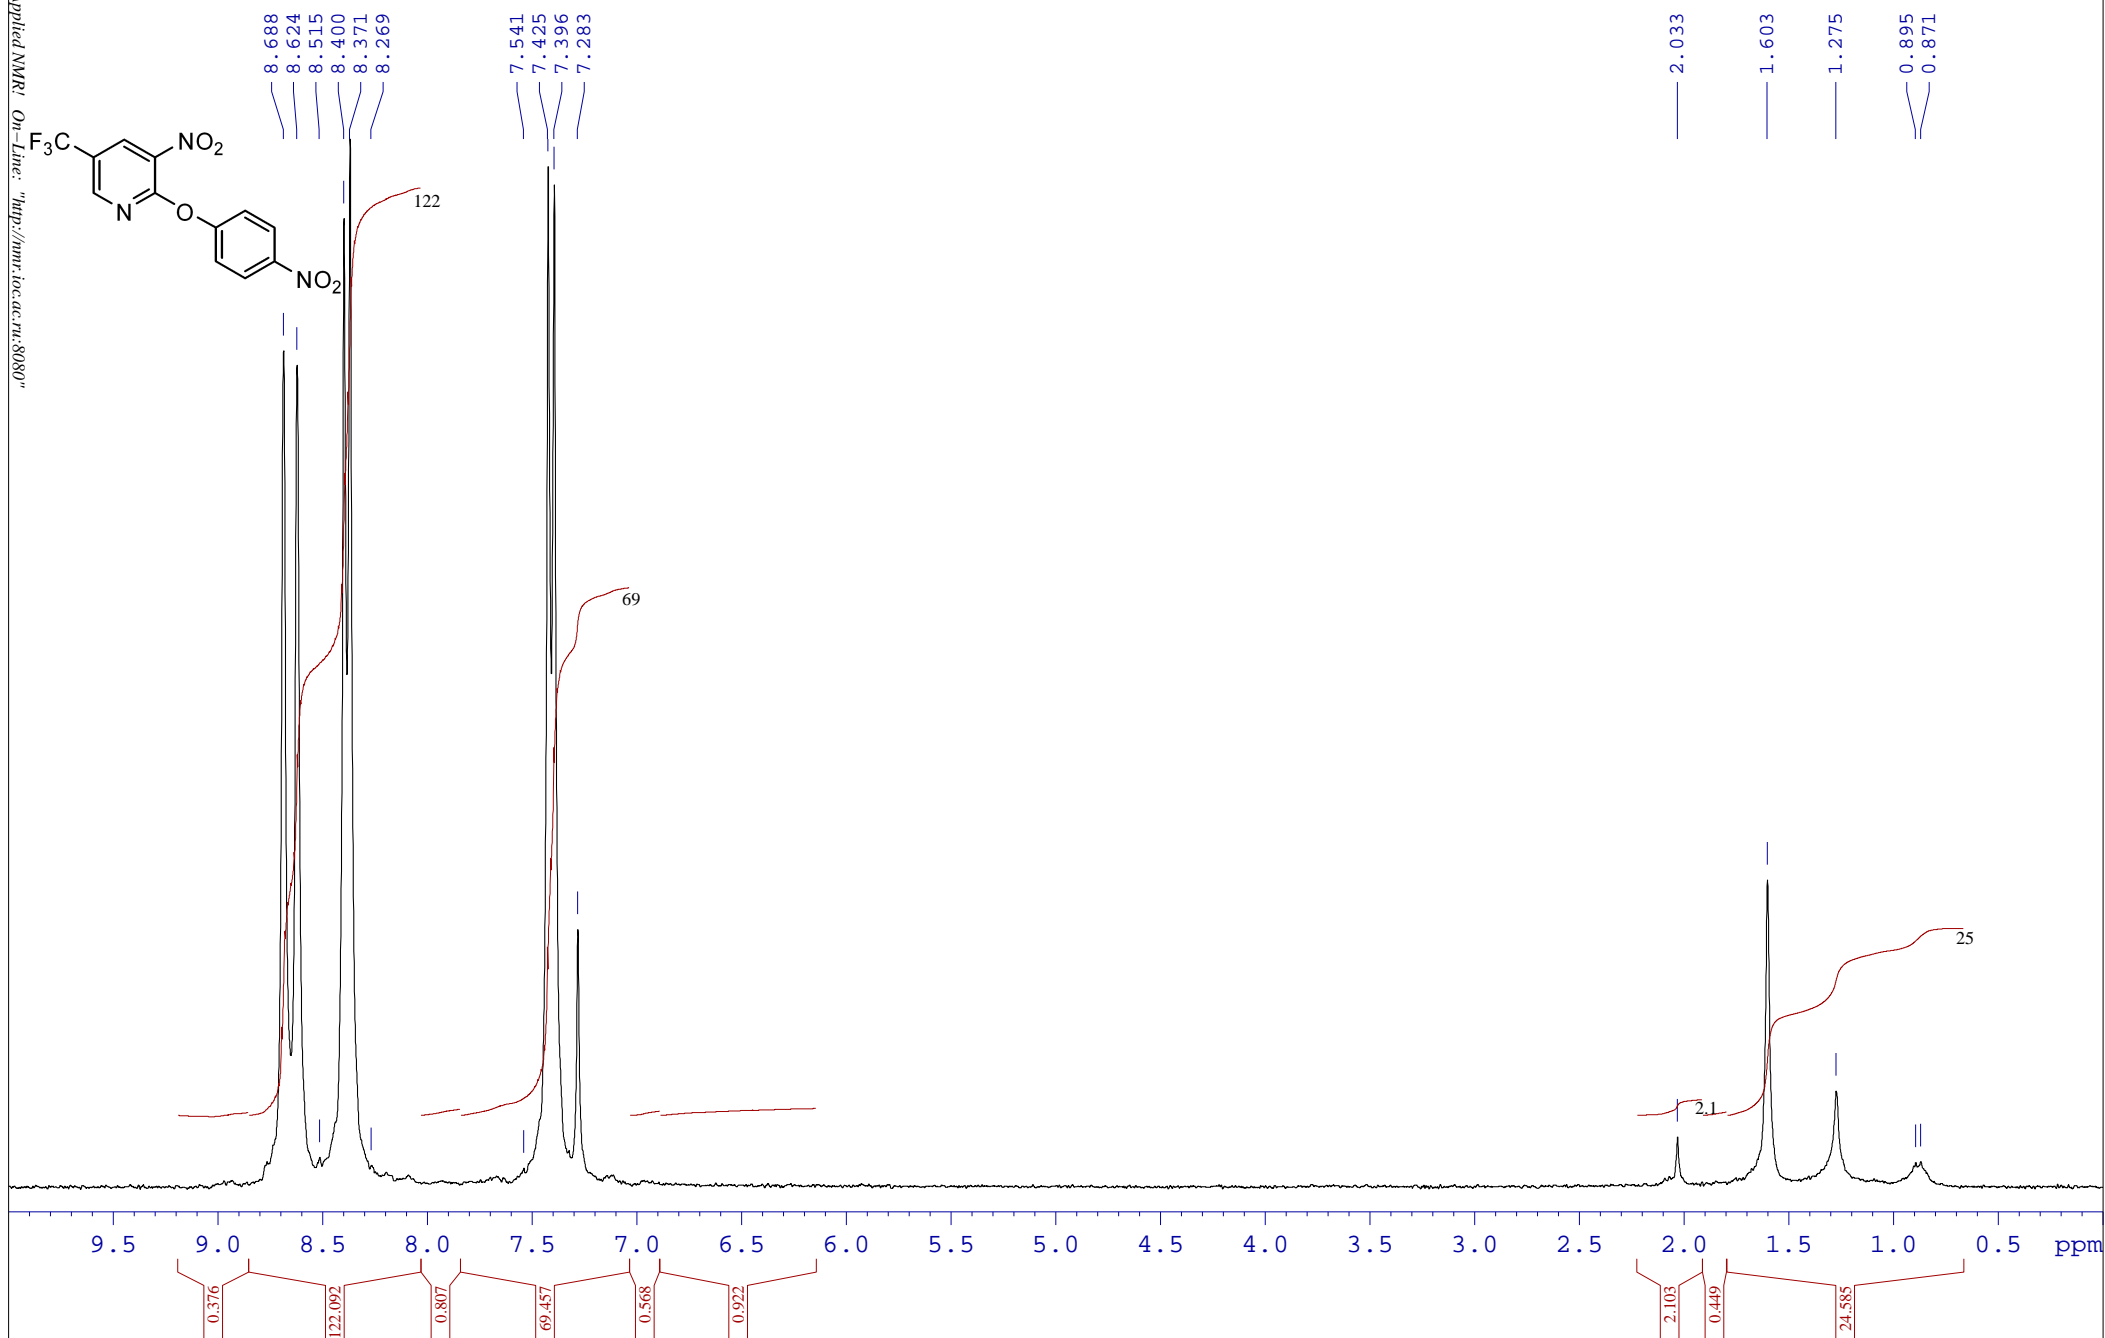



/LPIK AF-364.13 Kokorekin-20259

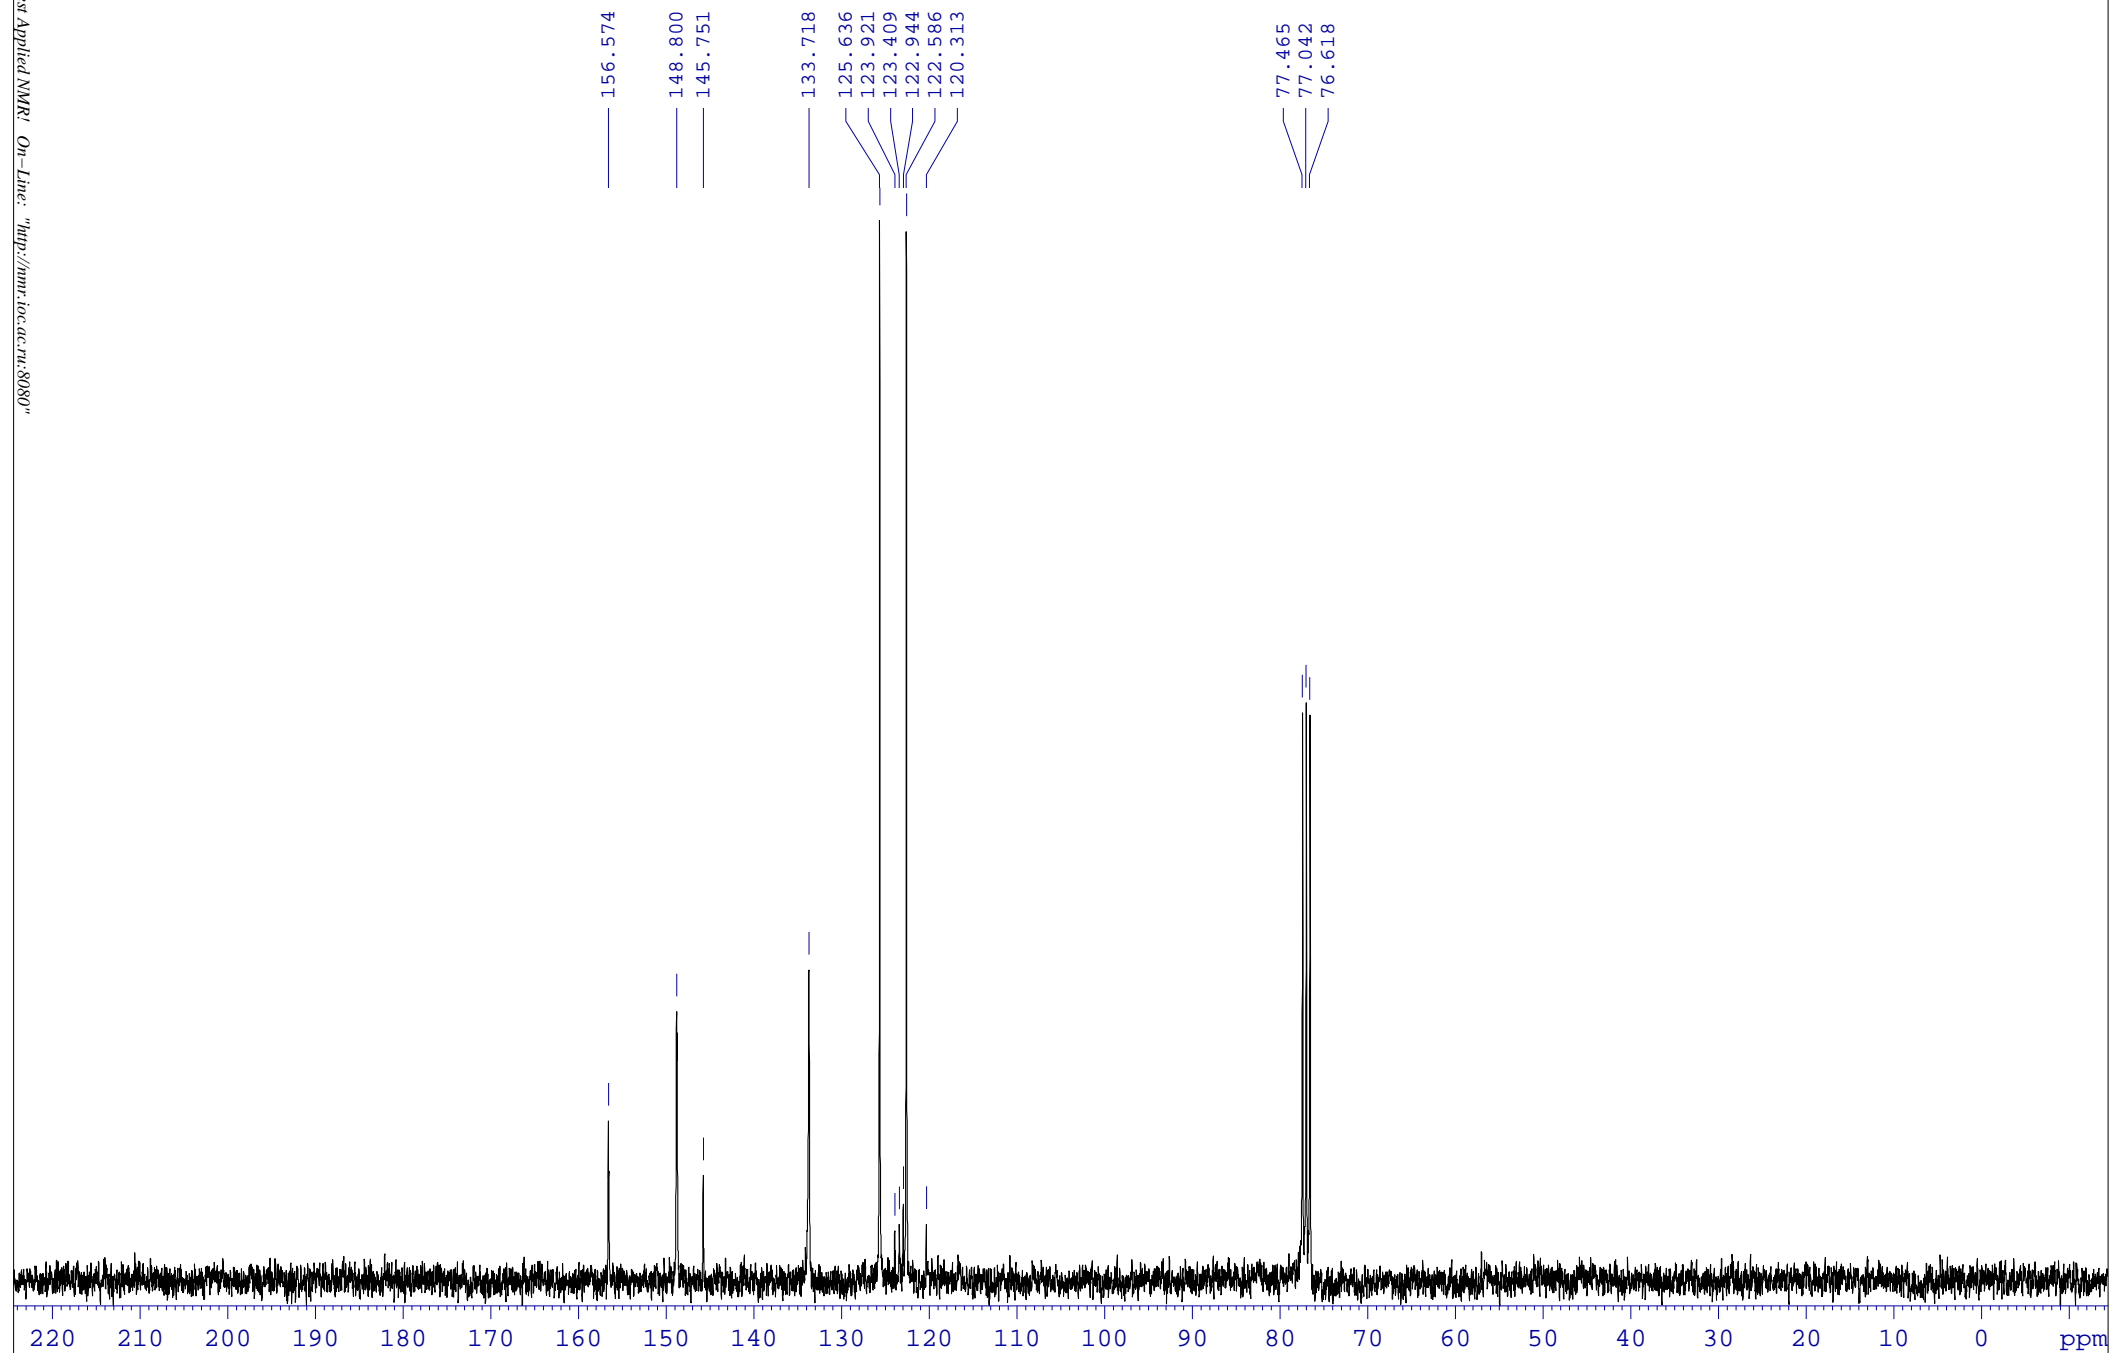

# Display Report

## Analysis Info

Analysis Name D:\Data\Kolotyrkina\2021\Bastrakov\0211019.d  
Method tune\_50-1600.m  
Sample Name /LPIK AF-364  
Comment C12H6F3N3O5 mH 330.0332 alibrant added CH3OH

Acquisition Date 11.02.2021 12:34:23

Operator BDAL@DE  
Instrument / Ser# micrOTOF 10248

## Acquisition Parameter

|             |            |                      |          |                  |           |
|-------------|------------|----------------------|----------|------------------|-----------|
| Source Type | ESI        | Ion Polarity         | Positive | Set Nebulizer    | 1.0 Bar   |
| Focus       | Not active |                      |          | Set Dry Heater   | 200 °C    |
| Scan Begin  | 50 m/z     | Set Capillary        | 4500 V   | Set Dry Gas      | 4.0 l/min |
| Scan End    | 1600 m/z   | Set End Plate Offset | -500 V   | Set Divert Valve | Waste     |

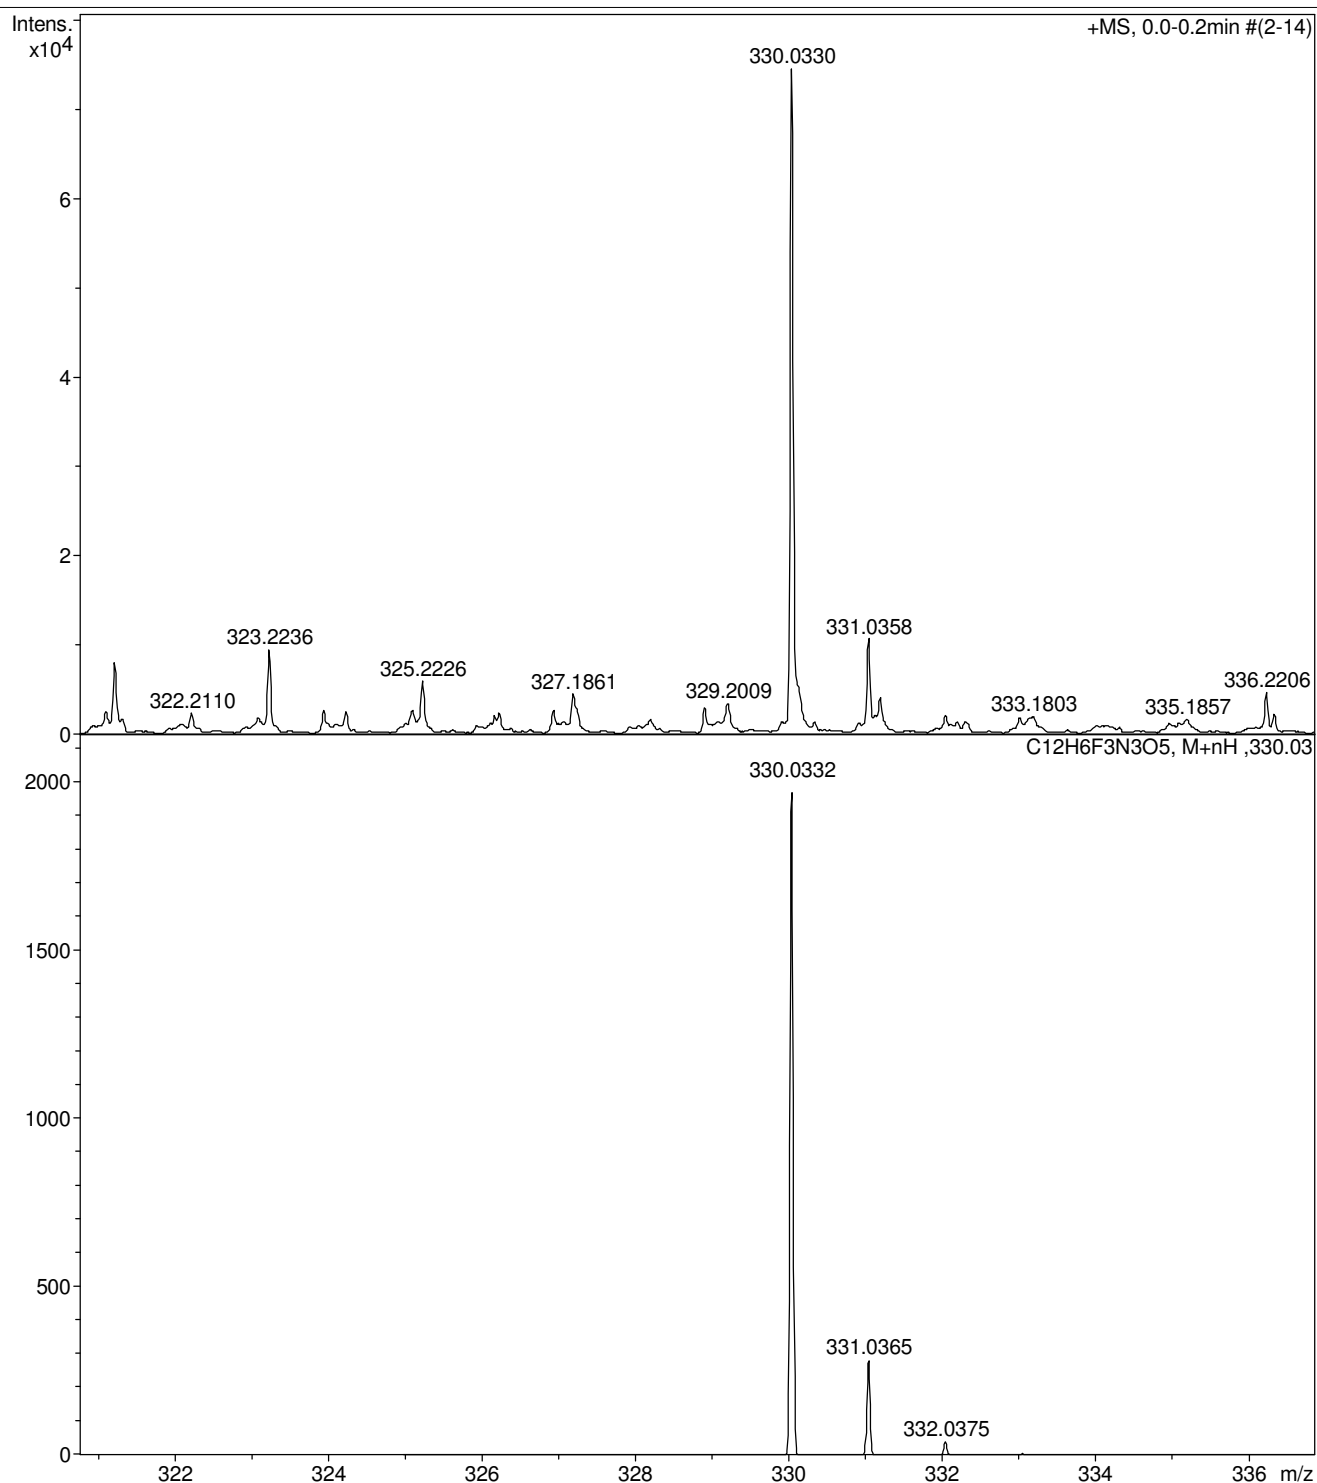

# Display Report

## Analysis Info

Analysis Name D:\Data\Kolotyrkina\2021\Bastrakov\0211020.d  
Method tune\_50-1600.m  
Sample Name /LPIK AF-364  
Comment C13H9CIN2O5 mH 309.0272 alibrant added CH3OH

Acquisition Date 11.02.2021 12:40:15

Operator BDAL@DE  
Instrument / Ser# micrOTOF 10248

## Acquisition Parameter

|             |            |                      |          |                  |           |
|-------------|------------|----------------------|----------|------------------|-----------|
| Source Type | ESI        | Ion Polarity         | Positive | Set Nebulizer    | 1.0 Bar   |
| Focus       | Not active |                      |          | Set Dry Heater   | 200 °C    |
| Scan Begin  | 50 m/z     | Set Capillary        | 4500 V   | Set Dry Gas      | 4.0 l/min |
| Scan End    | 1600 m/z   | Set End Plate Offset | -500 V   | Set Divert Valve | Waste     |

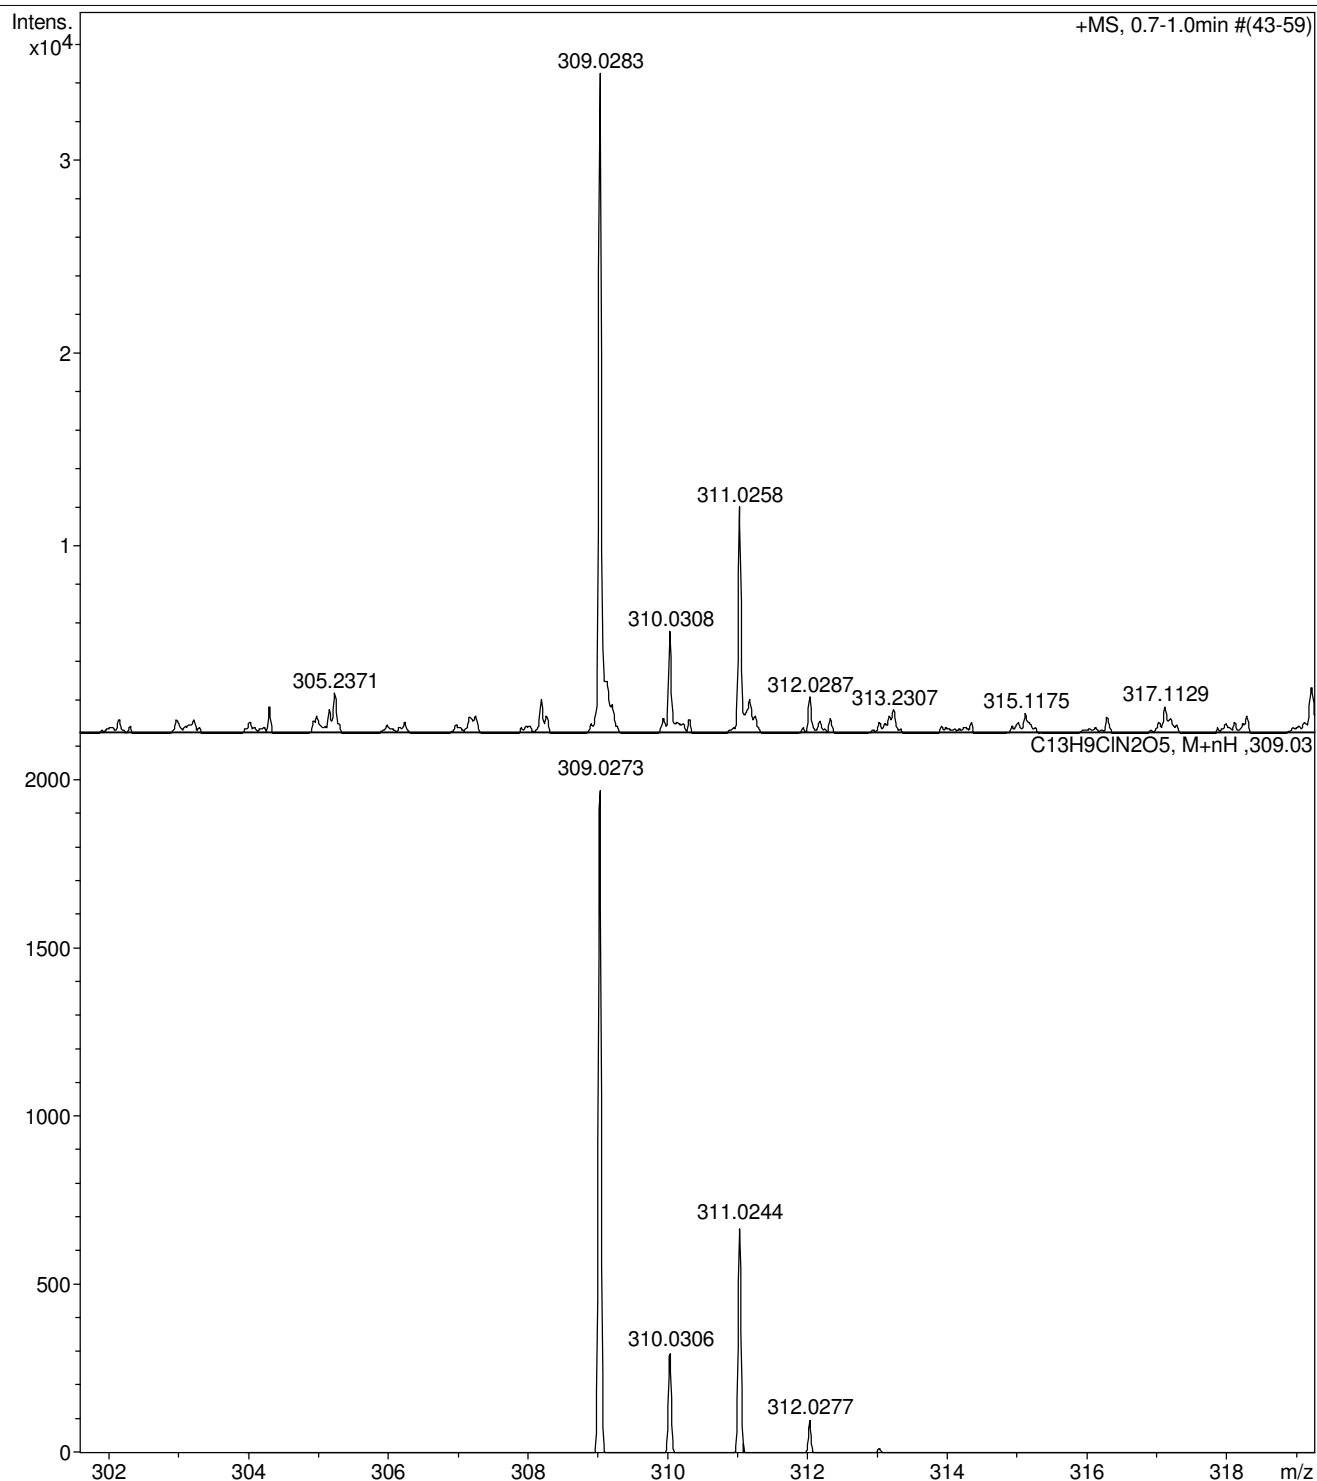





/LPIK AF-369

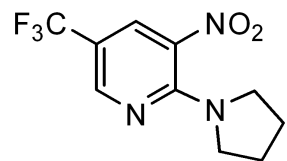

8.545

8.306

7.287

3.473

2.079

2.061

2.039

2.017

1.599

1.277

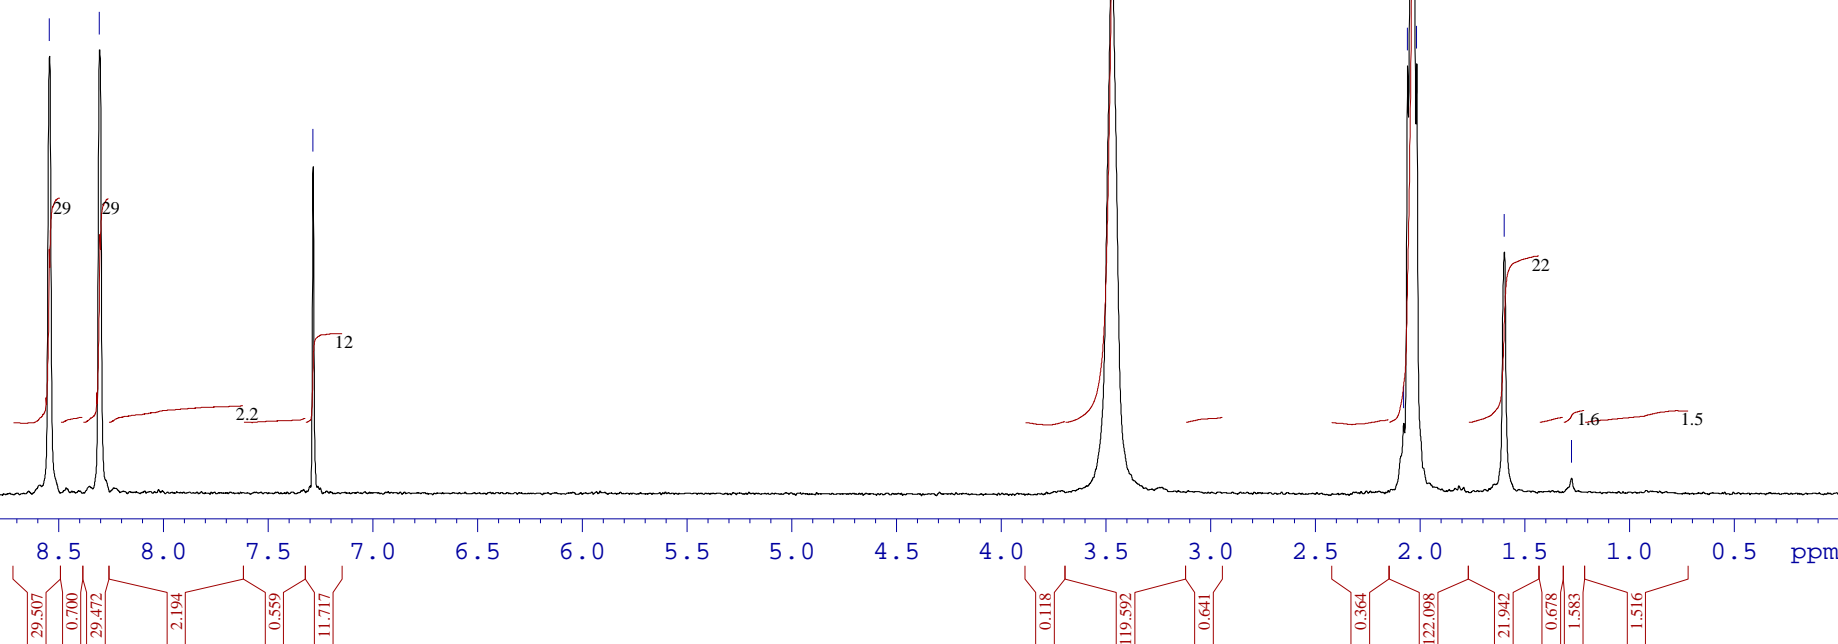



/LPIK AF-369.13 Kokorekin-20259

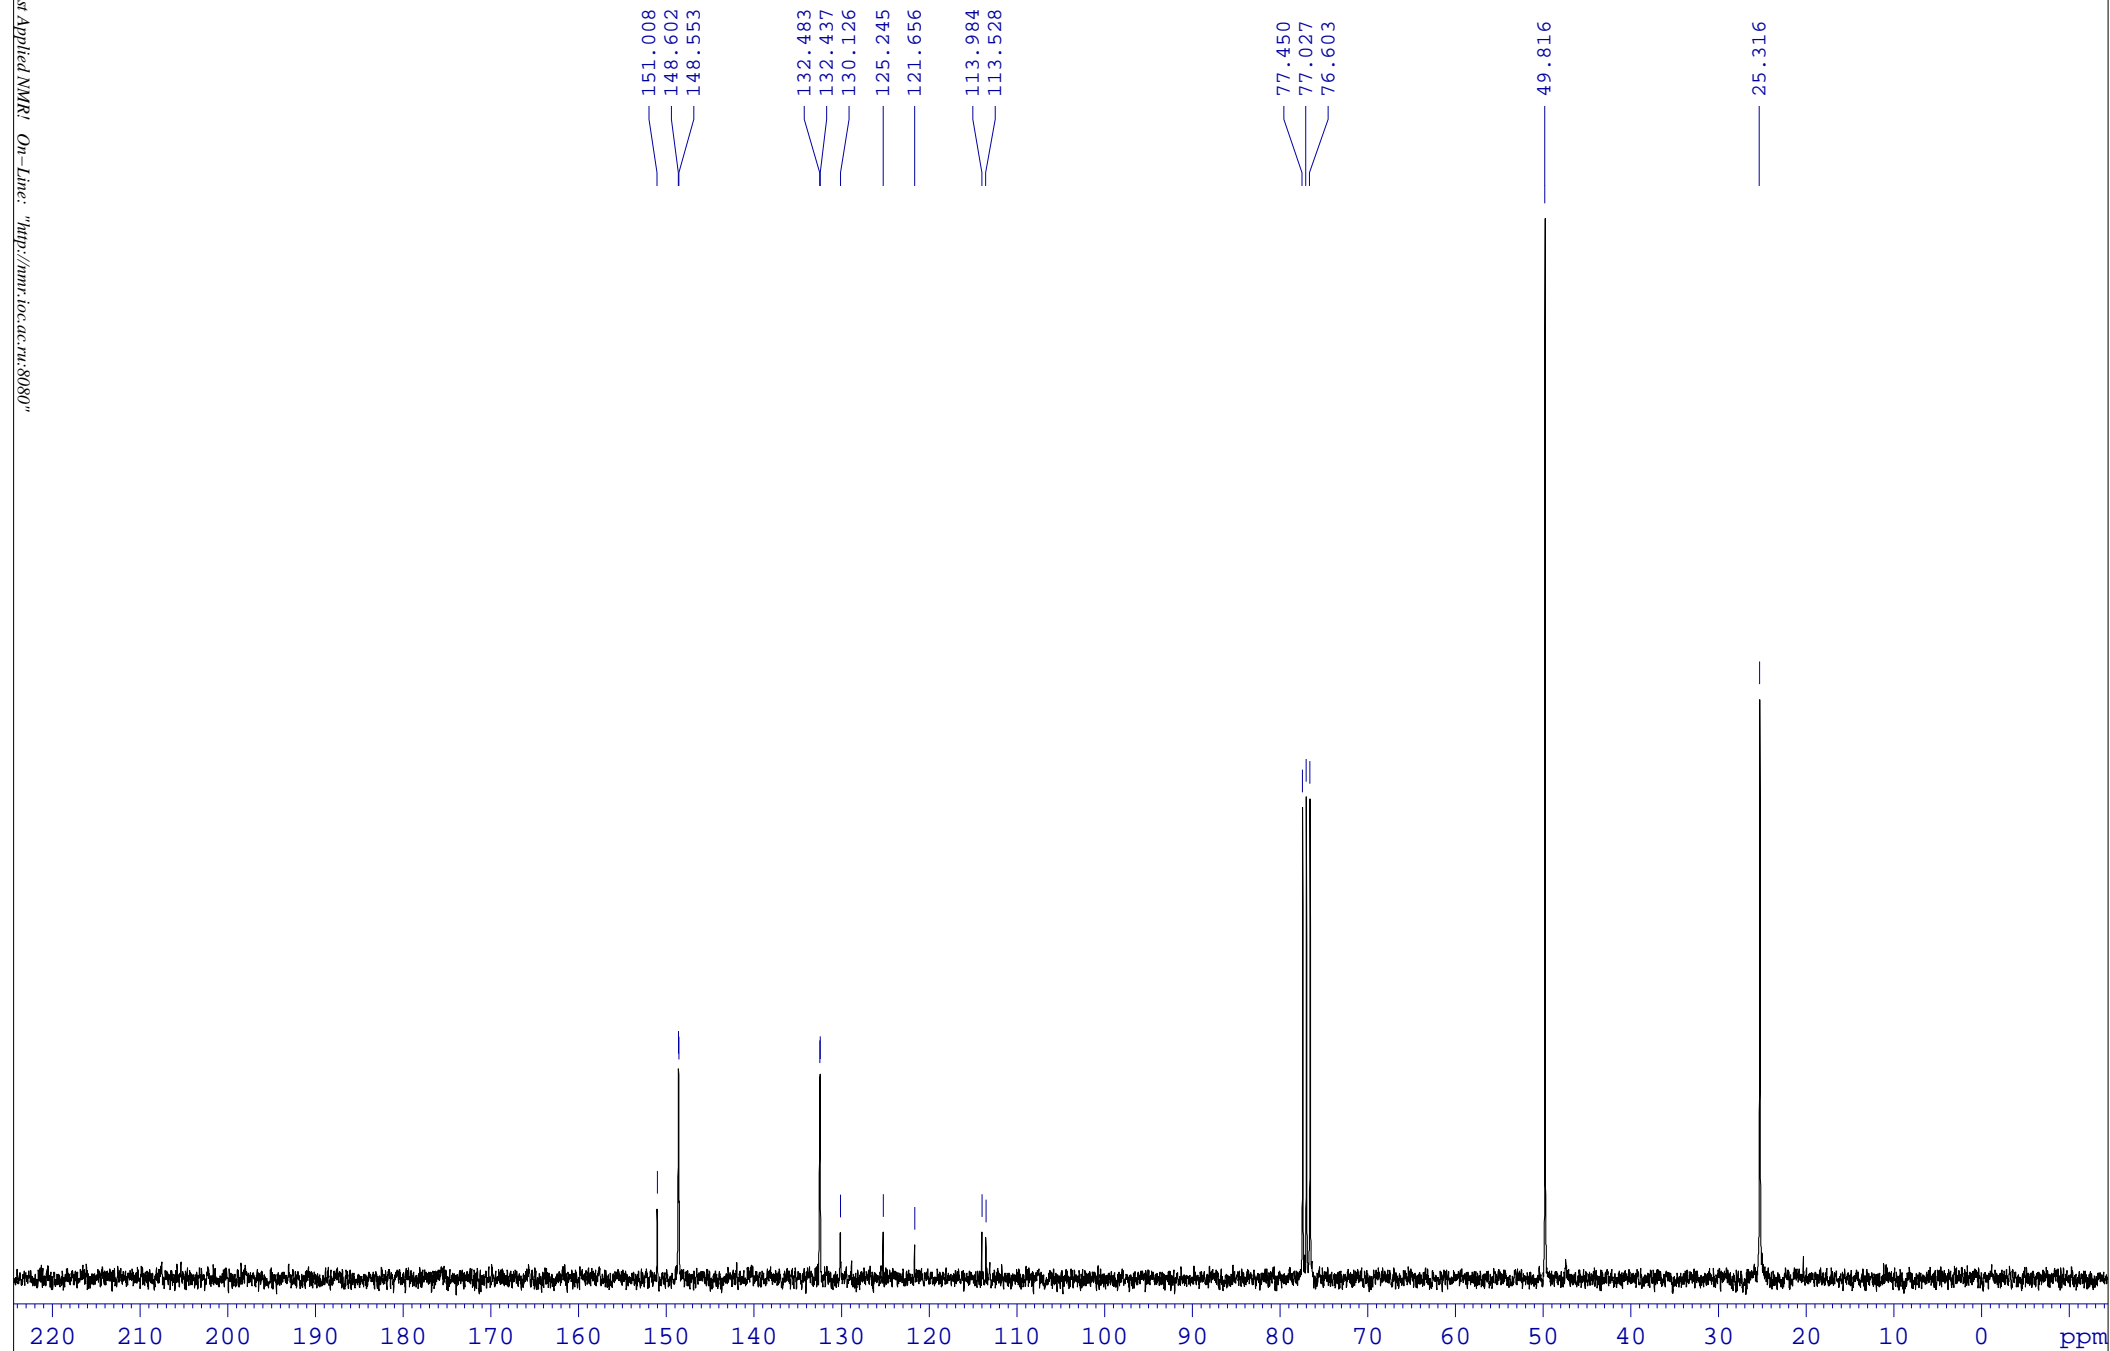

# Display Report

## Analysis Info

Analysis Name D:\Data\Kolotyrkina\2021\Bastrakov\0210025.d  
Method tune\_50-1600.m  
Sample Name /LPIK AF-369  
Comment C10H10F3N3O2 mH 262.0797 calibrant added CH3CN

Acquisition Date 10.02.2021 20:24:40

Operator BDAL@DE  
Instrument / Ser# microTOF 10248

## Acquisition Parameter

|             |            |                      |          |                  |           |
|-------------|------------|----------------------|----------|------------------|-----------|
| Source Type | ESI        | Ion Polarity         | Positive | Set Nebulizer    | 1.0 Bar   |
| Focus       | Not active |                      |          | Set Dry Heater   | 200 °C    |
| Scan Begin  | 50 m/z     | Set Capillary        | 4500 V   | Set Dry Gas      | 4.0 l/min |
| Scan End    | 1600 m/z   | Set End Plate Offset | -500 V   | Set Divert Valve | Waste     |

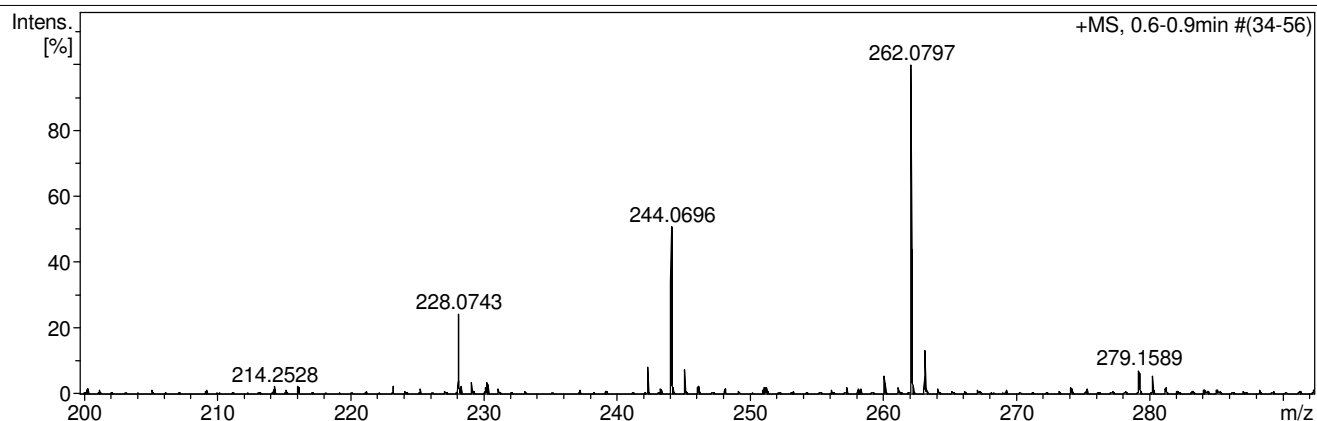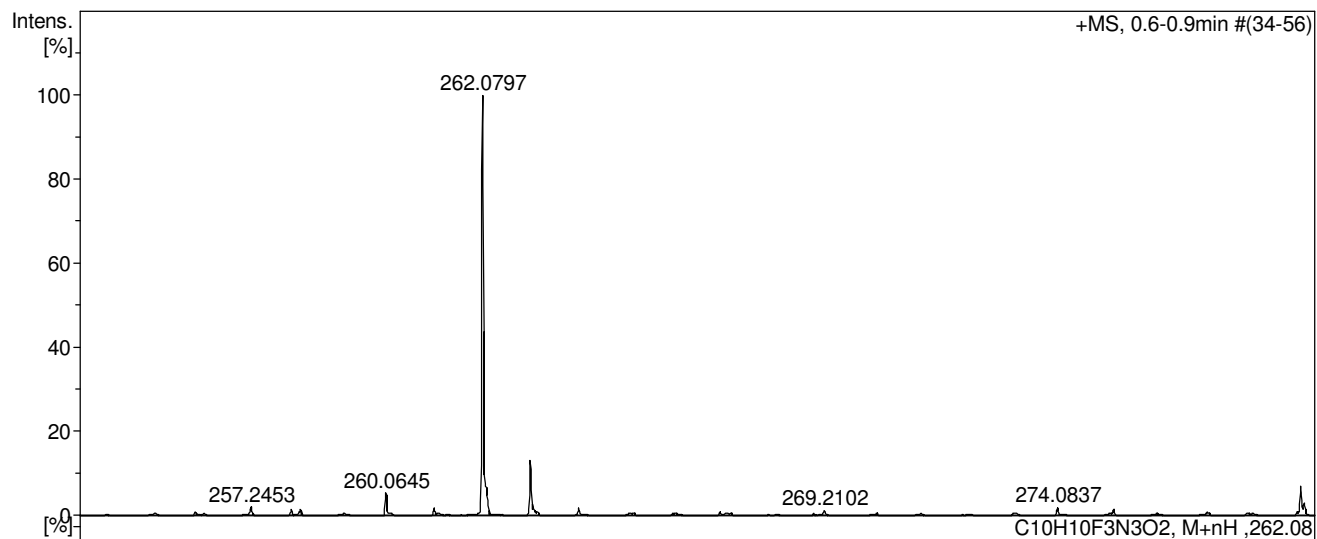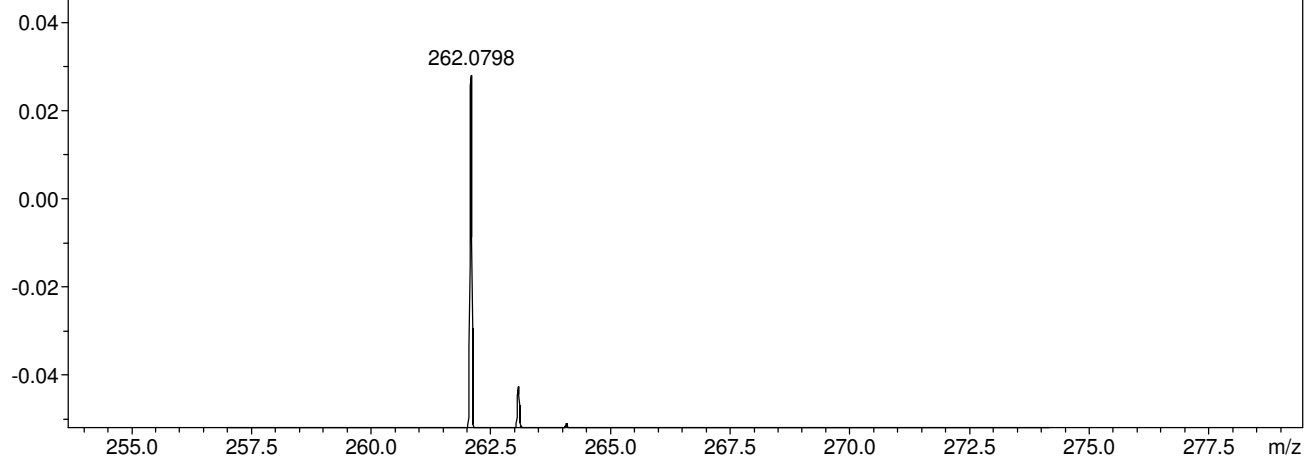



/LPIK AF-386

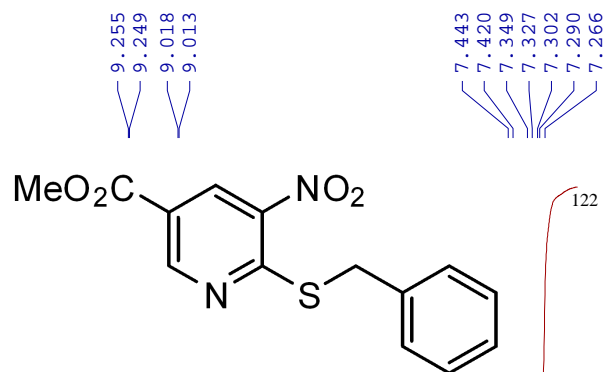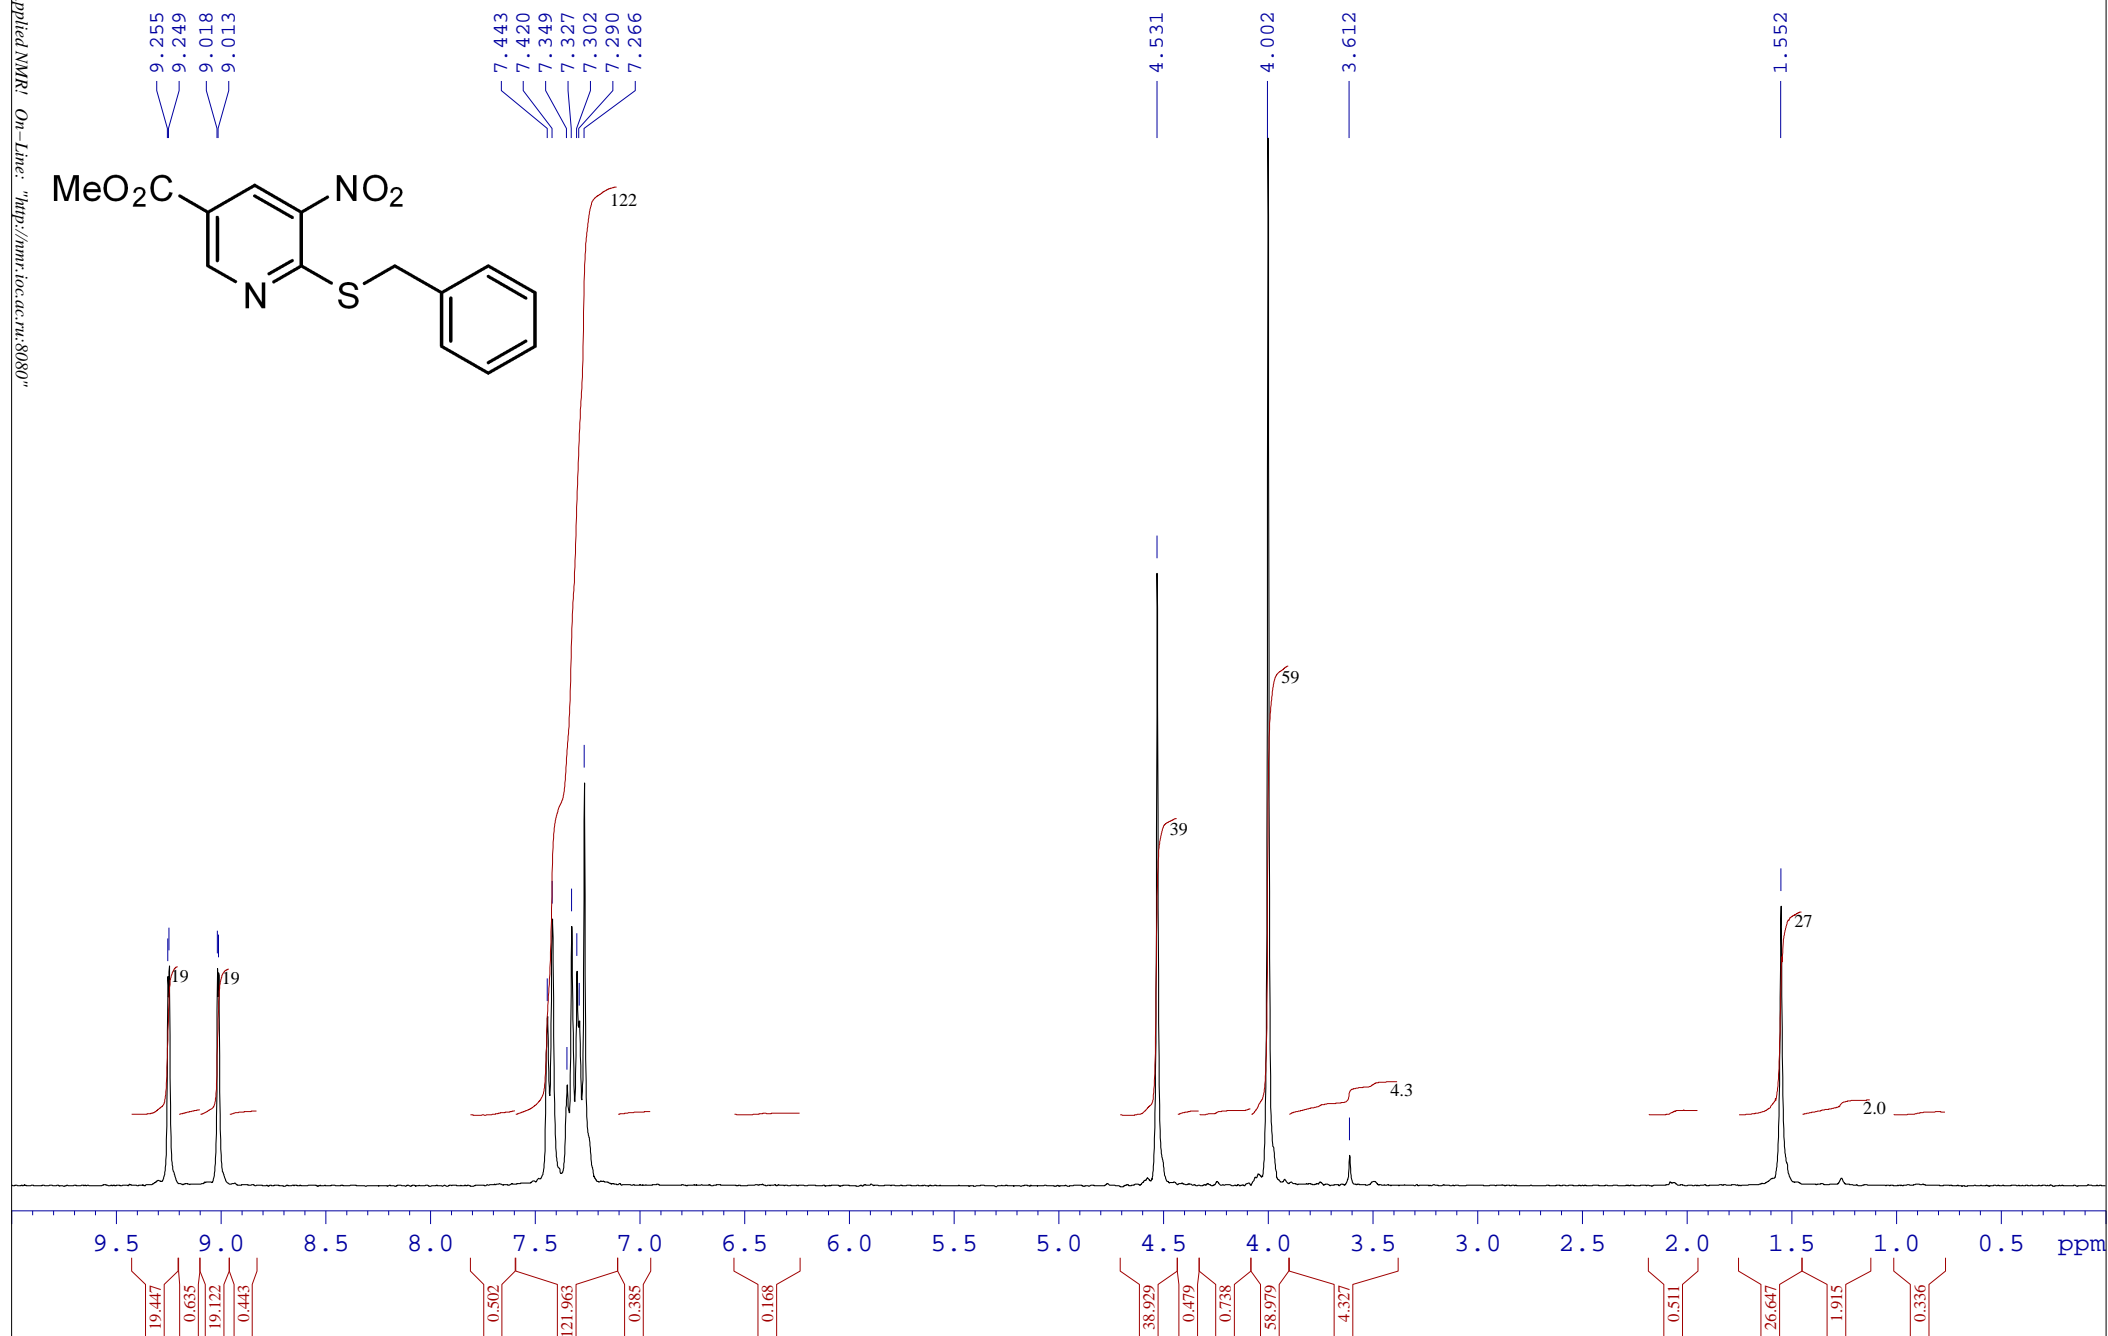



# /LPIK AF-386.13 Kokorekin-20259

164.031  
162.331  
153.218  
141.124  
136.197  
134.378  
129.423  
128.638  
127.544  
121.757  
77.477  
77.053  
76.630  
52.861  
35.800

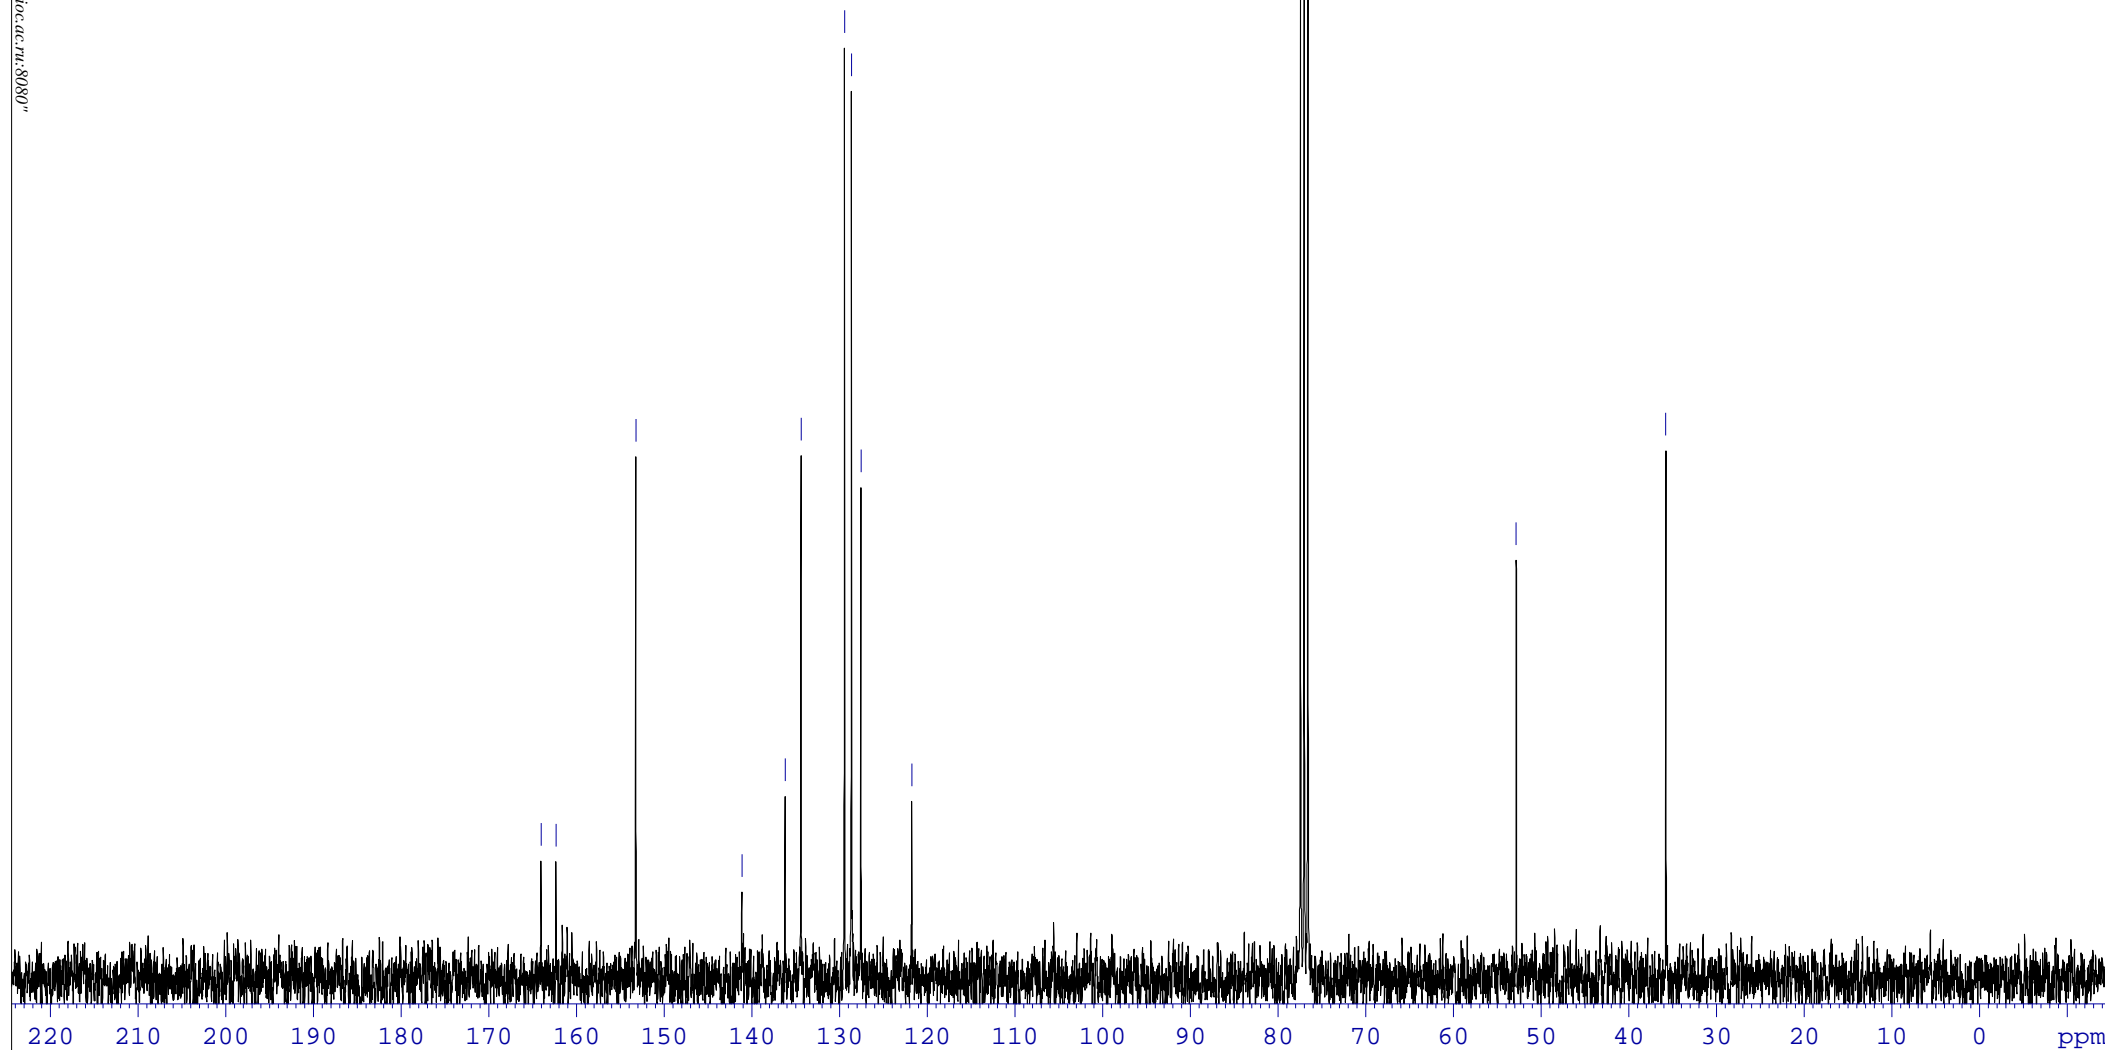

# Display Report

## Analysis Info

Analysis Name D:\Data\Kolotyrkina\2021\Bastrakov\0210027.d  
Method tune\_50-1600.m  
Sample Name /LPIK AF-386  
Comment C14H12N2O4S mH 305.050 calibrant added CH3CN

Acquisition Date 10.02.2021 20:41:38

Operator BDAL@DE  
Instrument / Ser# micrOTOF 10248

## Acquisition Parameter

|             |            |                      |          |                  |           |
|-------------|------------|----------------------|----------|------------------|-----------|
| Source Type | ESI        | Ion Polarity         | Positive | Set Nebulizer    | 1.0 Bar   |
| Focus       | Not active |                      |          | Set Dry Heater   | 200 °C    |
| Scan Begin  | 50 m/z     | Set Capillary        | 4500 V   | Set Dry Gas      | 4.0 l/min |
| Scan End    | 1600 m/z   | Set End Plate Offset | -500 V   | Set Divert Valve | Waste     |

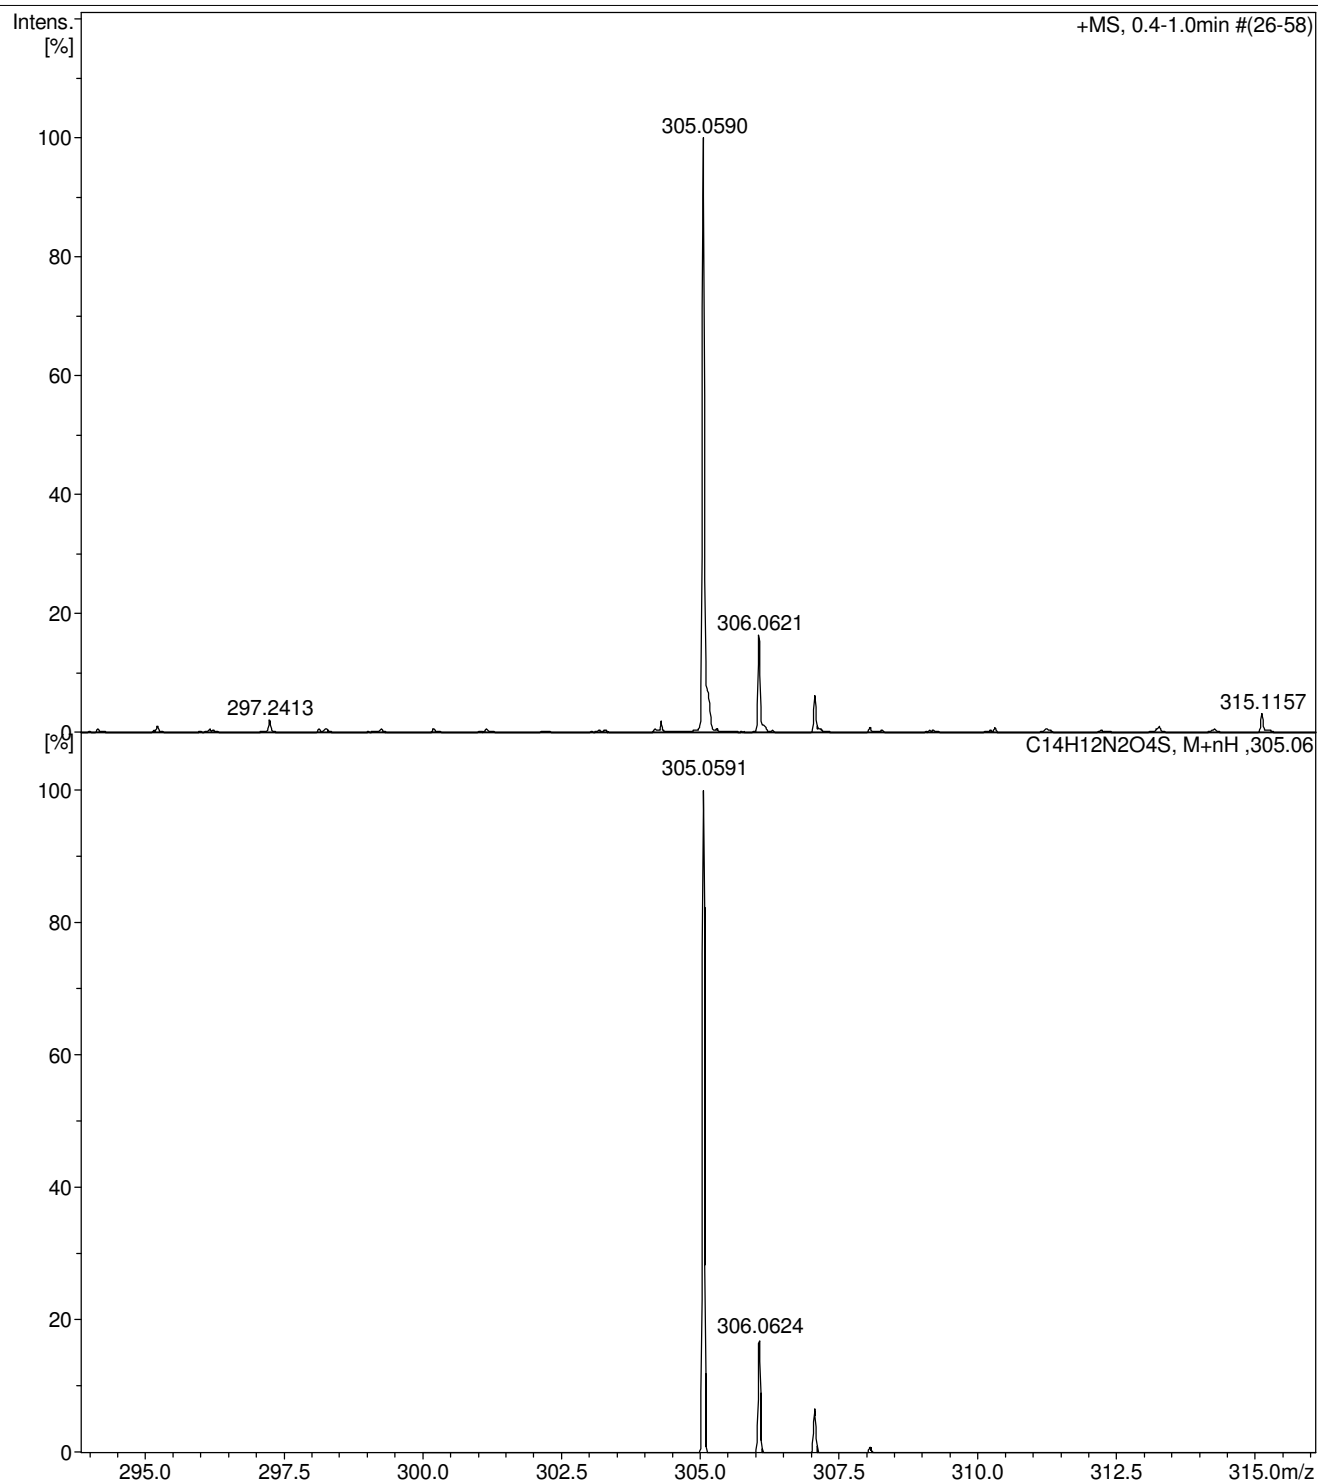



/LPIK AF-389

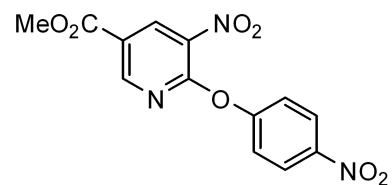

8.966  
8.926  
8.921

8.373  
8.343

7.405  
7.375  
7.265

4.052  
4.025  
3.999

2.009

1.565

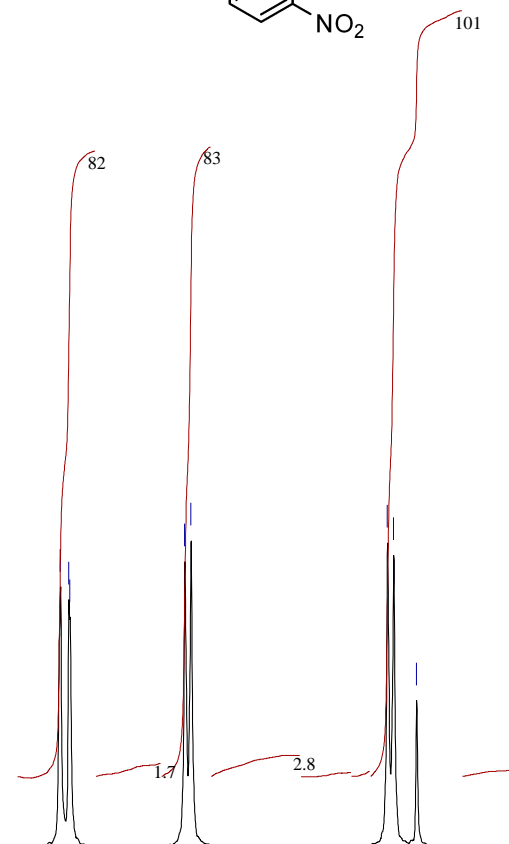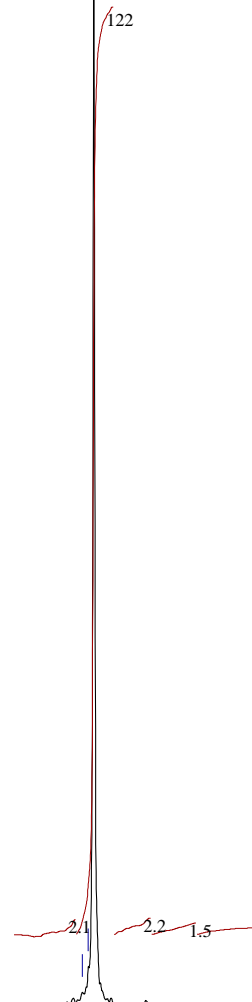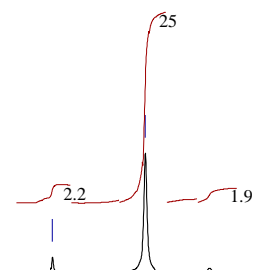

9.5 9.0 8.5 8.0 7.5 7.0 6.5 6.0 5.5 5.0 4.5 4.0 3.5 3.0 2.5 2.0 1.5 1.0 0.5 ppm

82.266  
1.728  
82.813  
2.773  
0.525  
0.672  
100.758  
0.806

1.983  
122.007  
2.162  
1.523  
0.910

2.310  
0.315  
25.032  
0.504  
1.827



# /LPIK AF-389.13 Kokorekin-20259

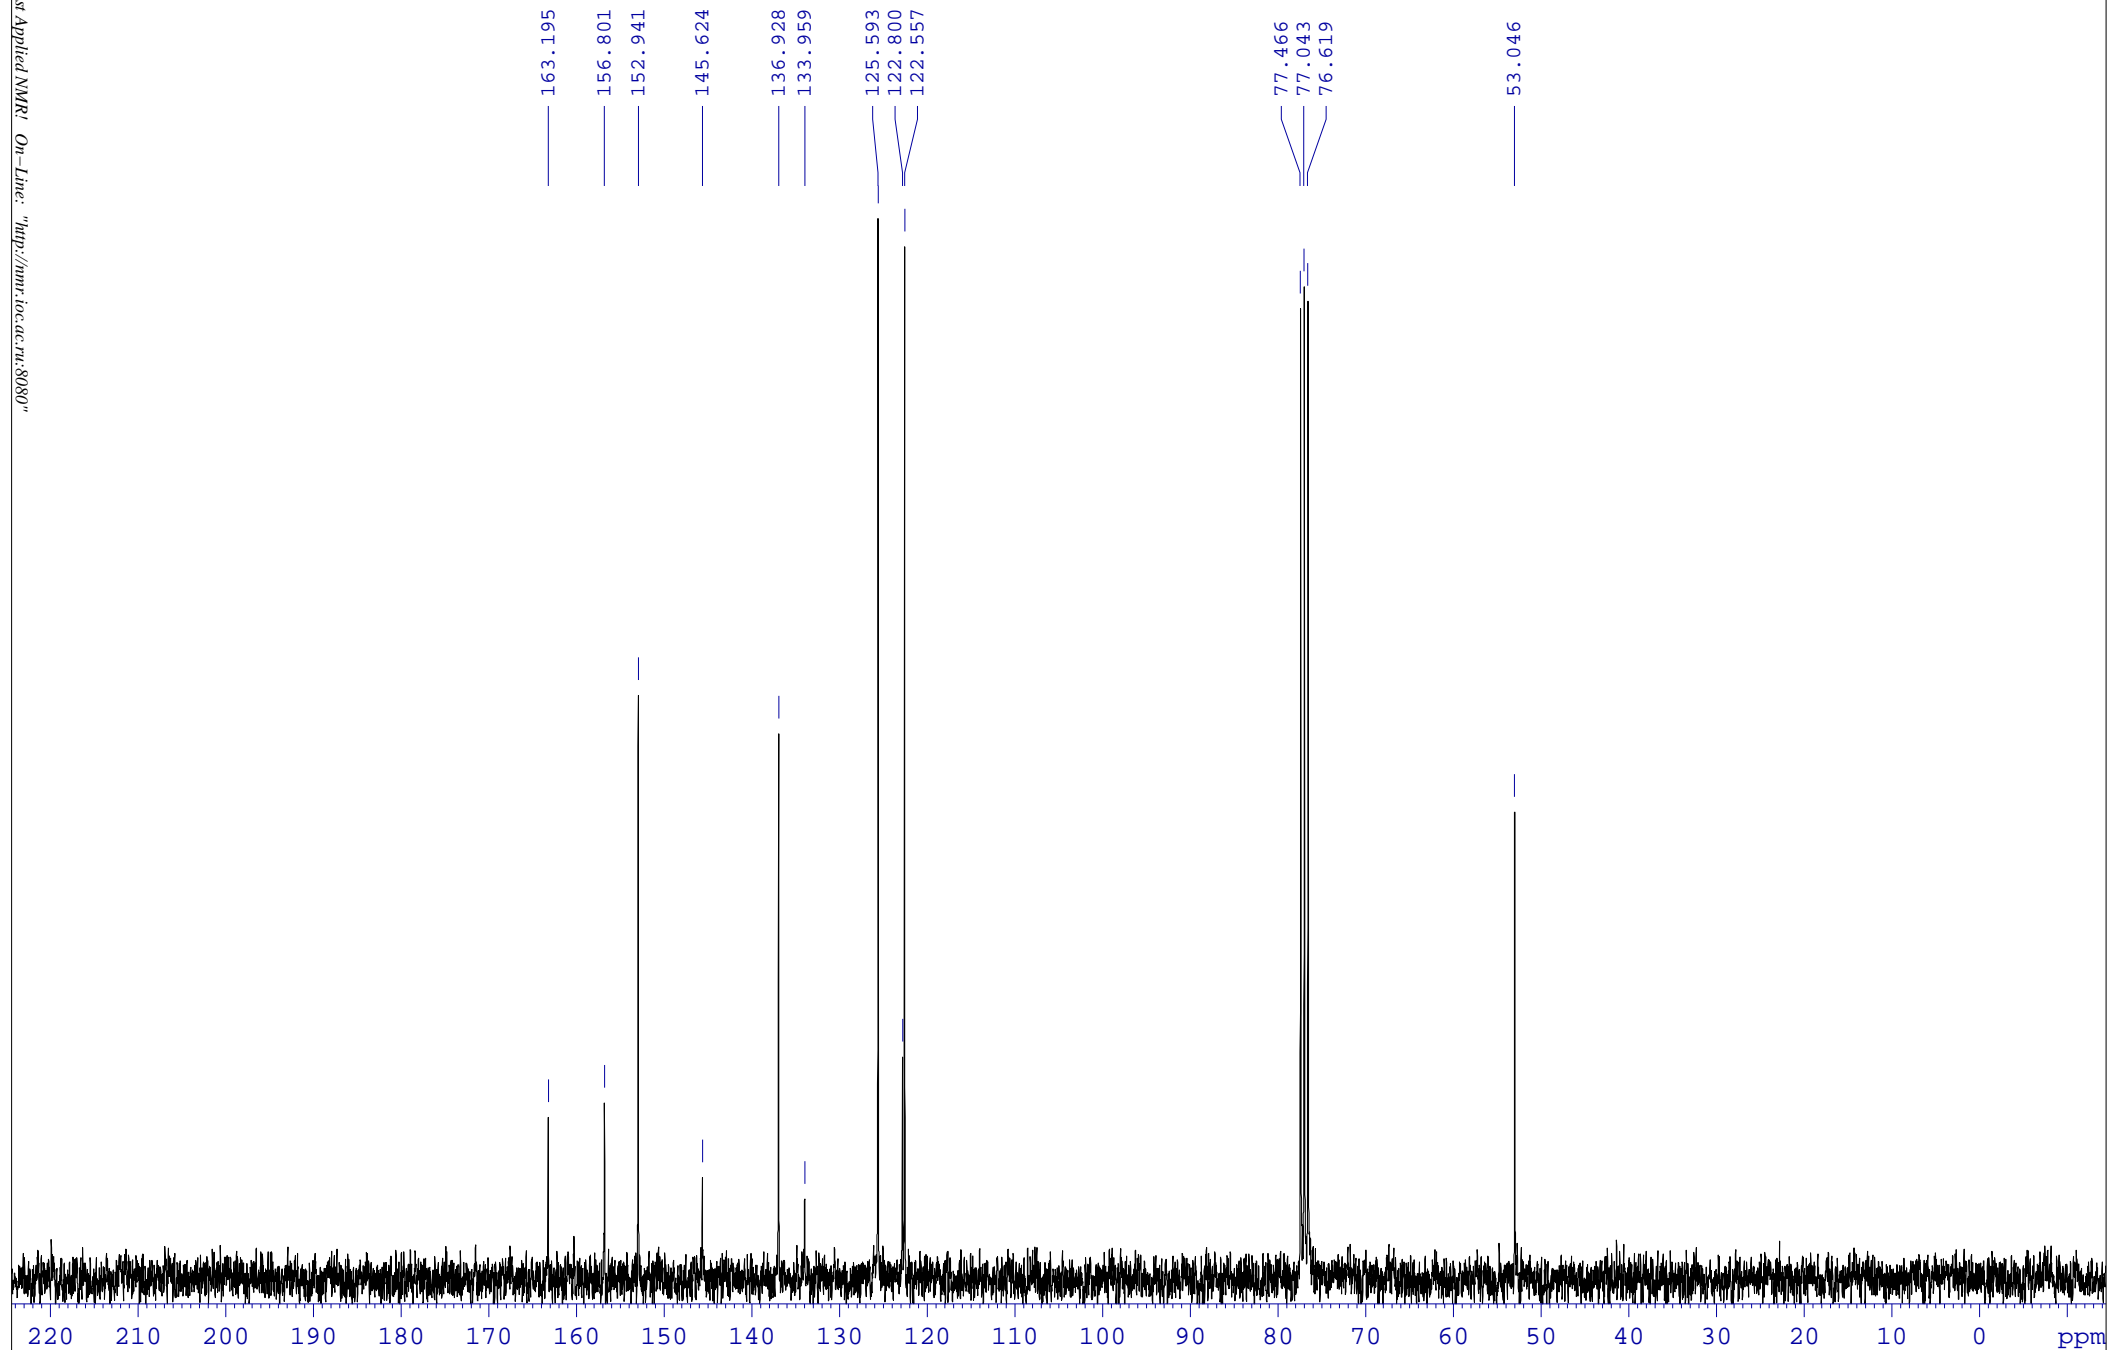



# Display Report

## Analysis Info

Analysis Name D:\Data\Kolotyrkina\2021\Bastrakov\0210028.d  
Method tune\_50-1600.m  
Sample Name /LPIK AF-389  
Comment C13H9N3O7 mH 320.0543calibrant added CH3CN

Acquisition Date 10.02.2021 20:47:05

Operator BDAL@DE  
Instrument / Ser# micrOTOF 10248

## Acquisition Parameter

|             |            |                      |          |                  |           |
|-------------|------------|----------------------|----------|------------------|-----------|
| Source Type | ESI        | Ion Polarity         | Positive | Set Nebulizer    | 1.0 Bar   |
| Focus       | Not active |                      |          | Set Dry Heater   | 200 °C    |
| Scan Begin  | 50 m/z     | Set Capillary        | 4500 V   | Set Dry Gas      | 4.0 l/min |
| Scan End    | 1600 m/z   | Set End Plate Offset | -500 V   | Set Divert Valve | Waste     |

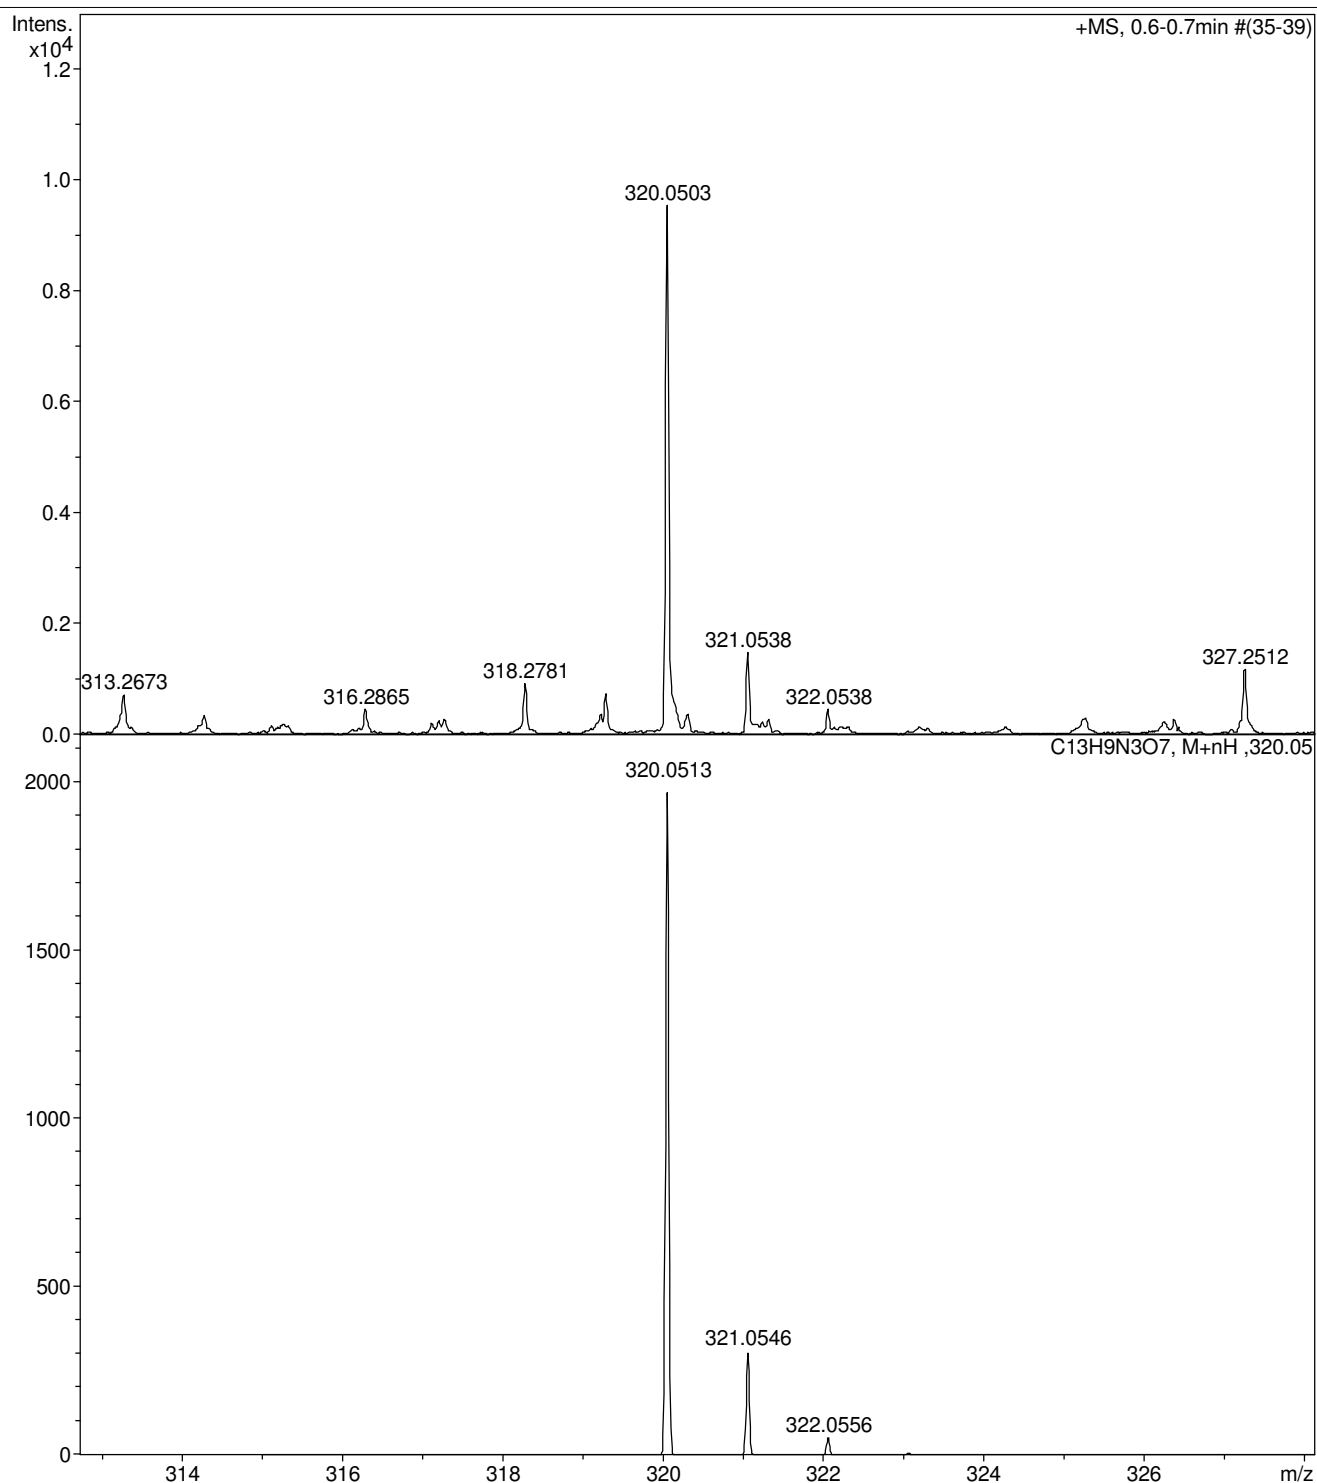



/LPIK AF-391

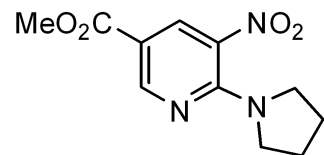

8.880  
8.622  
8.617

7.268

3.910  
3.866  
3.844  
3.476

2.013

1.607

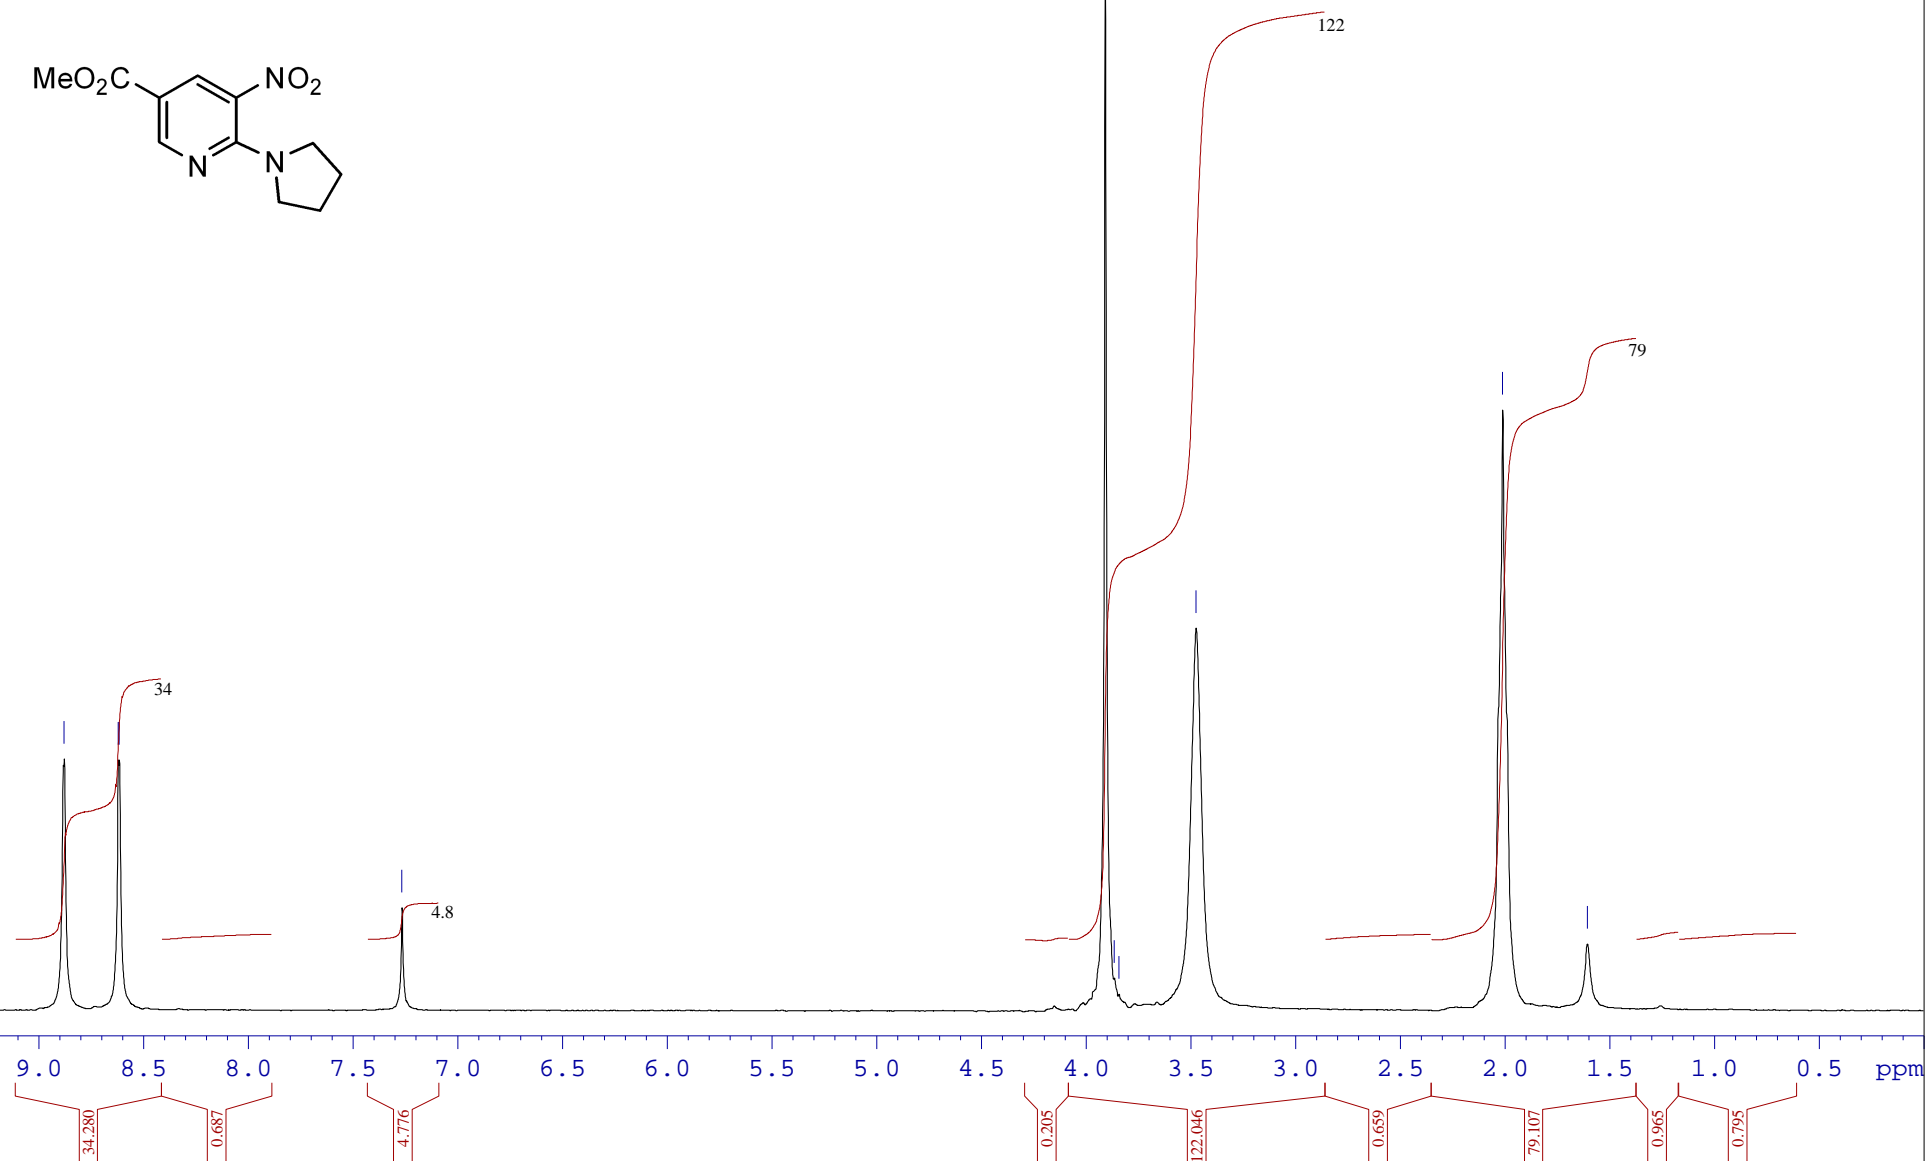



# /LPIK AF-391.13 Kokorekin-20259

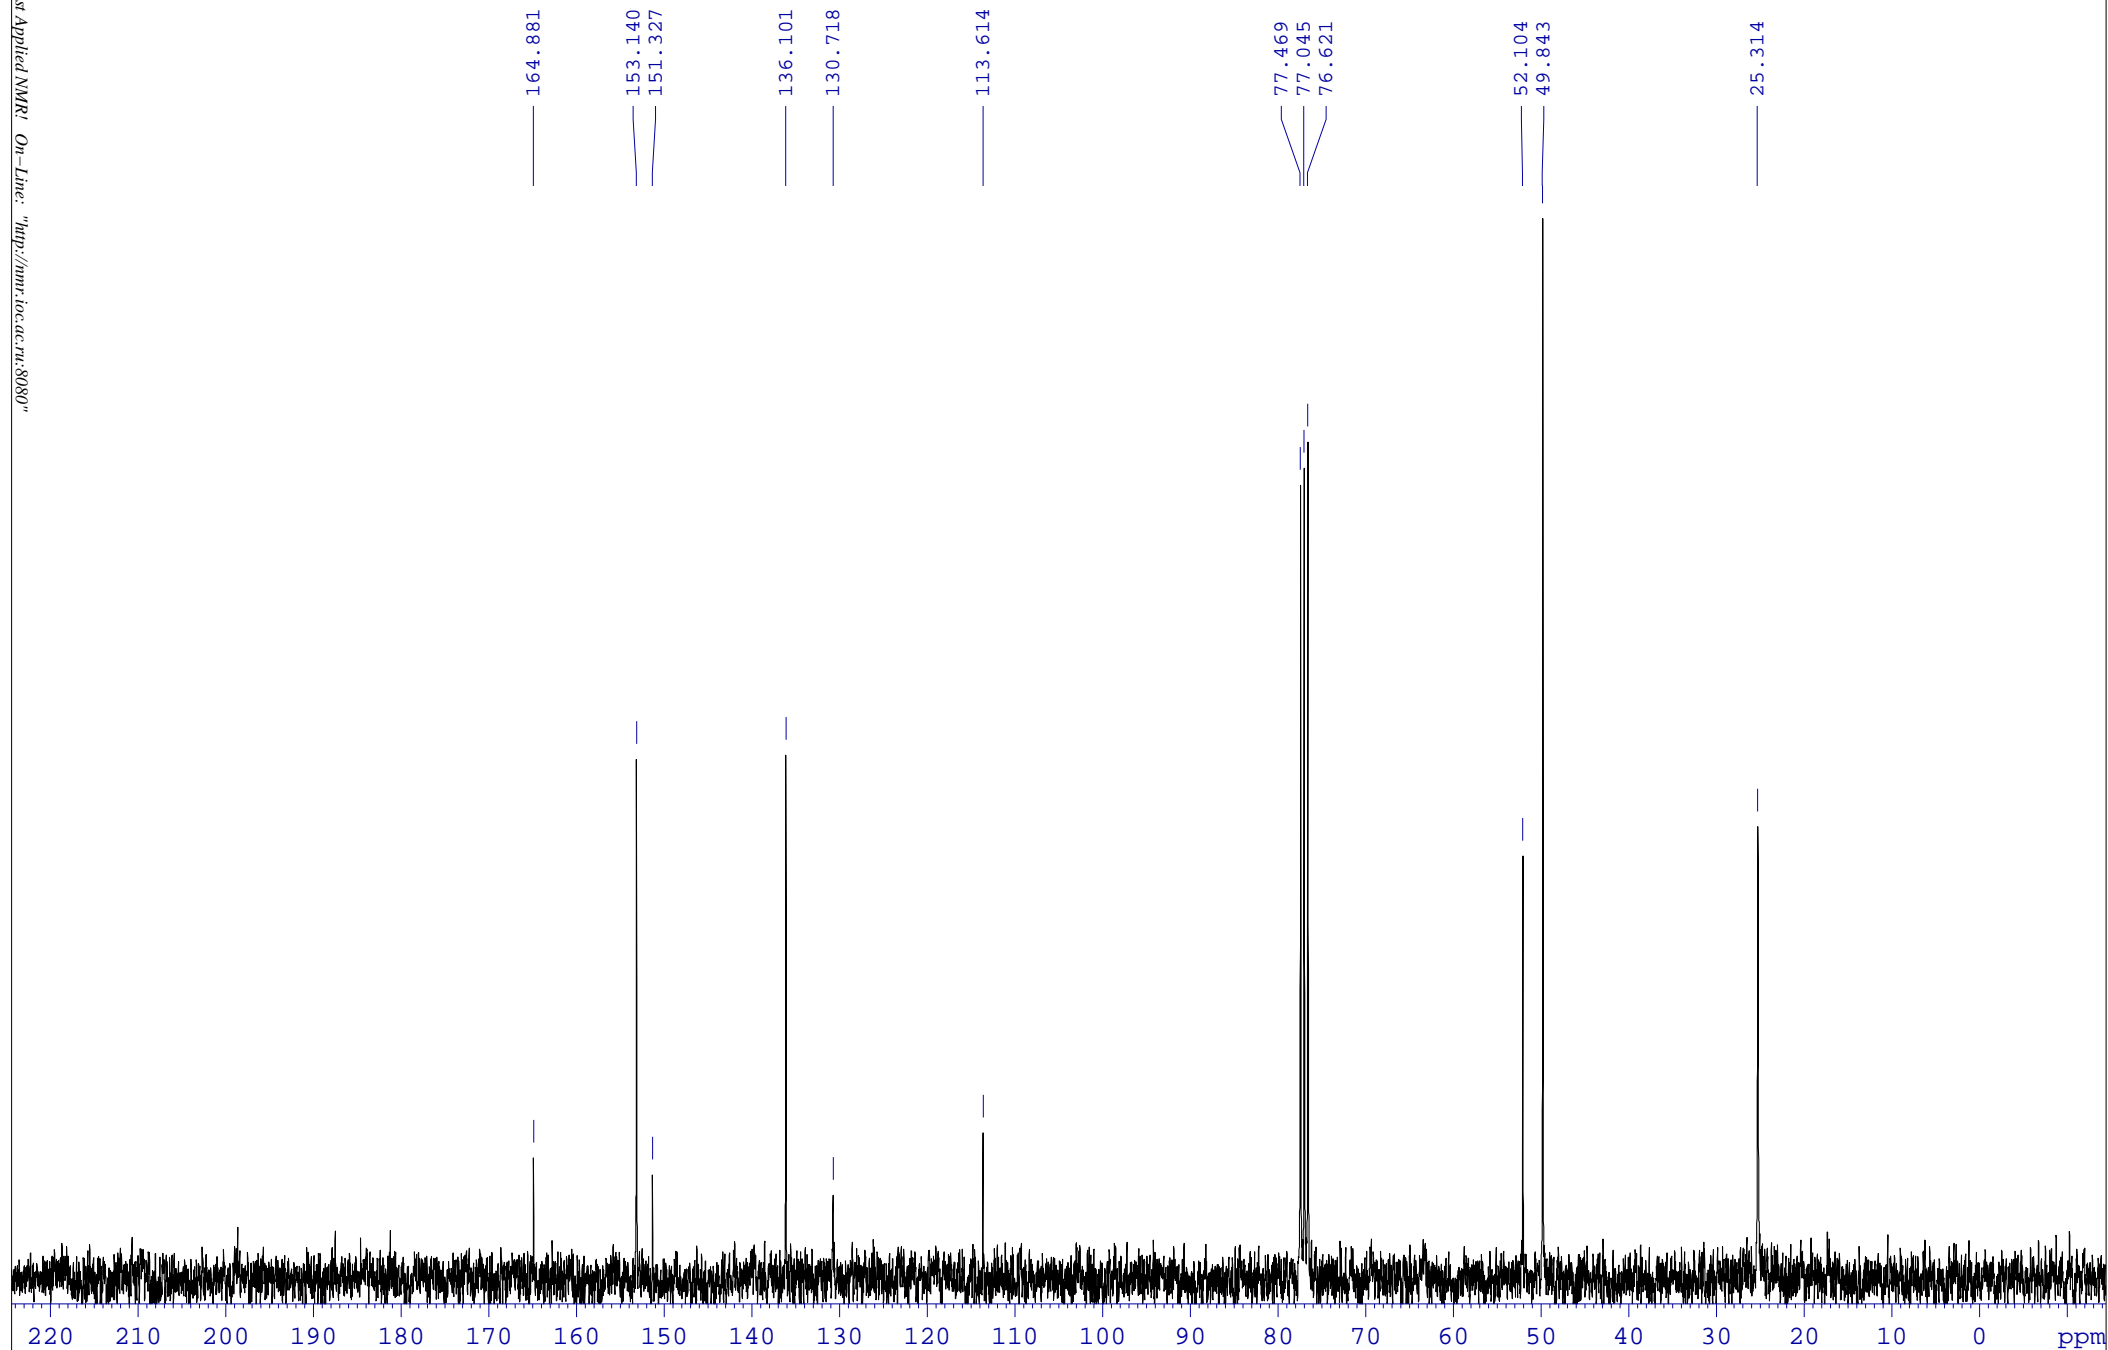

# Display Report

## Analysis Info

Analysis Name D:\Data\Kolotyrkina\2021\Bastrakov\0210029.d  
Method tune\_50-1600.m  
Sample Name /LPIK AF-391  
Comment C11H13N3O4 mH 252.0979 calibrant added CH3CN

Acquisition Date 10.02.2021 20:56:14

Operator BDAL@DE  
Instrument / Ser# micrOTOF 10248

## Acquisition Parameter

|             |            |                      |          |                  |           |
|-------------|------------|----------------------|----------|------------------|-----------|
| Source Type | ESI        | Ion Polarity         | Positive | Set Nebulizer    | 1.0 Bar   |
| Focus       | Not active |                      |          | Set Dry Heater   | 200 °C    |
| Scan Begin  | 50 m/z     | Set Capillary        | 4500 V   | Set Dry Gas      | 4.0 l/min |
| Scan End    | 1600 m/z   | Set End Plate Offset | -500 V   | Set Divert Valve | Waste     |

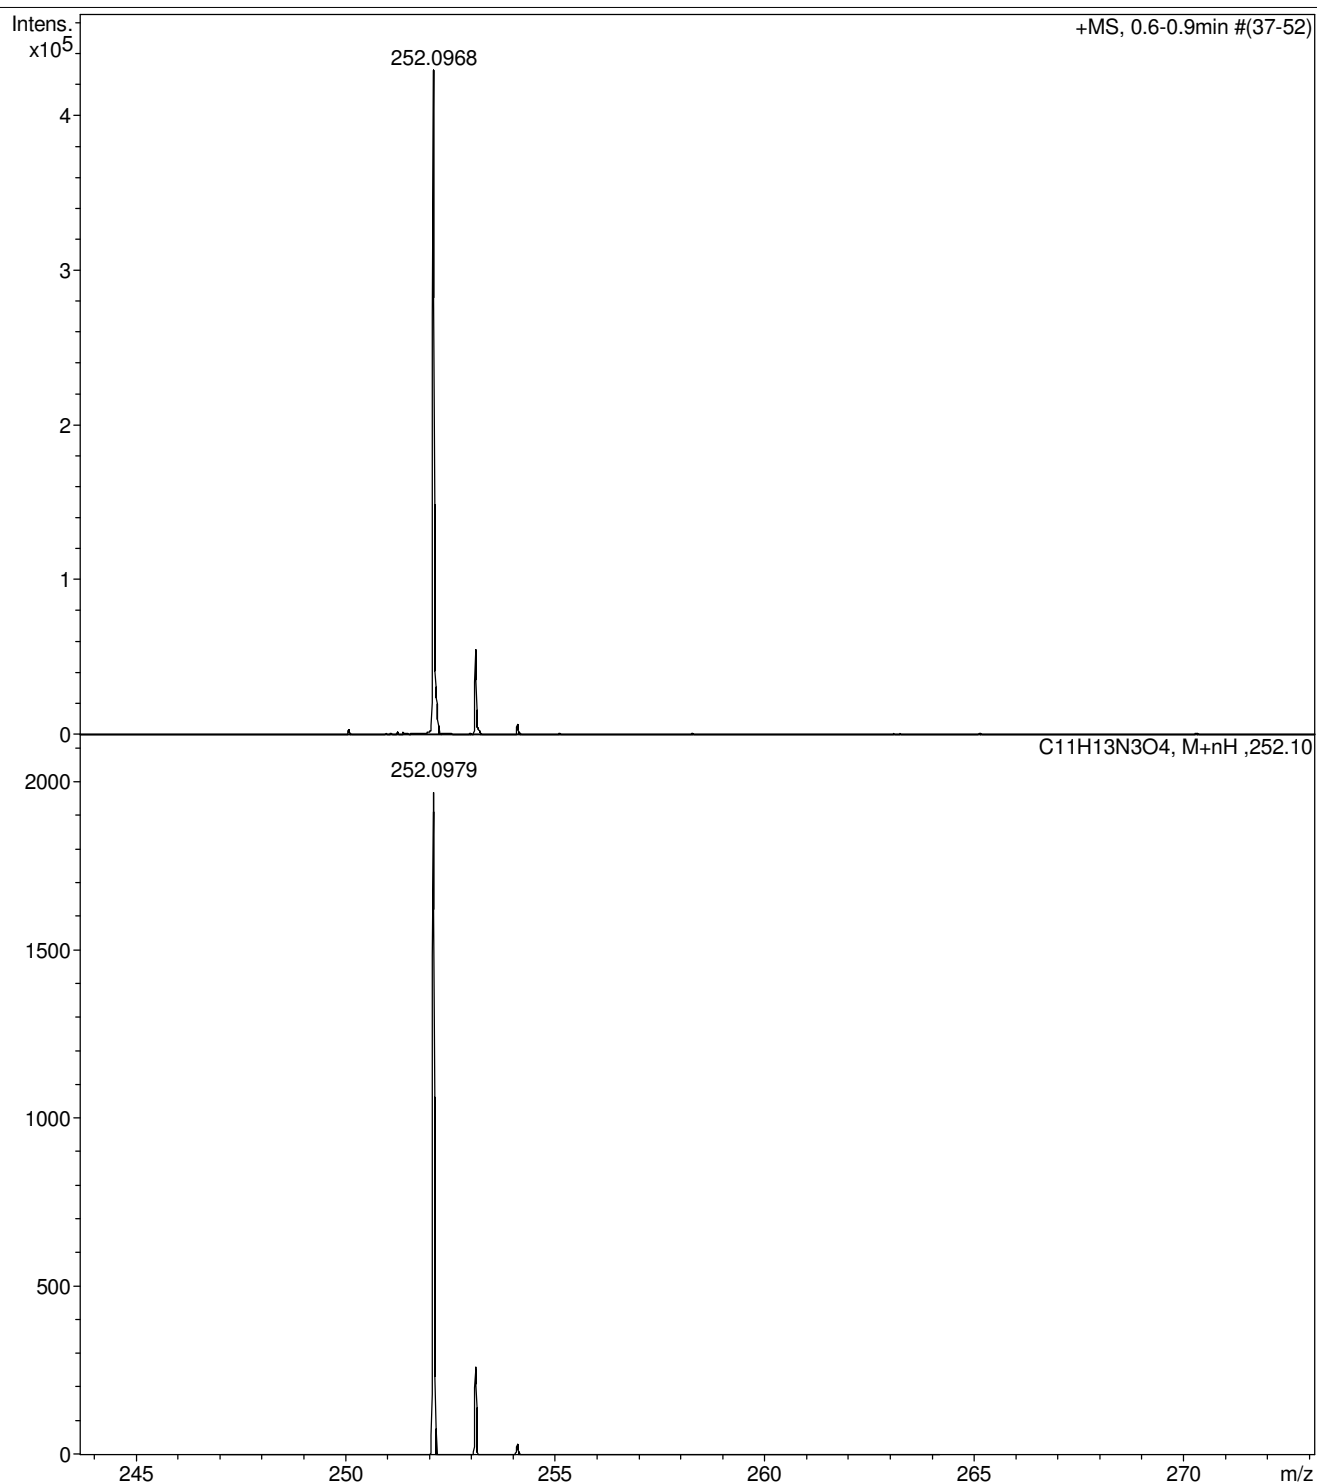



/LPIK AF-399

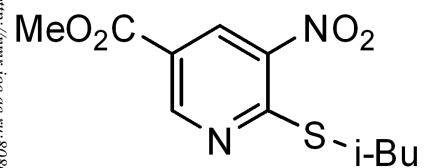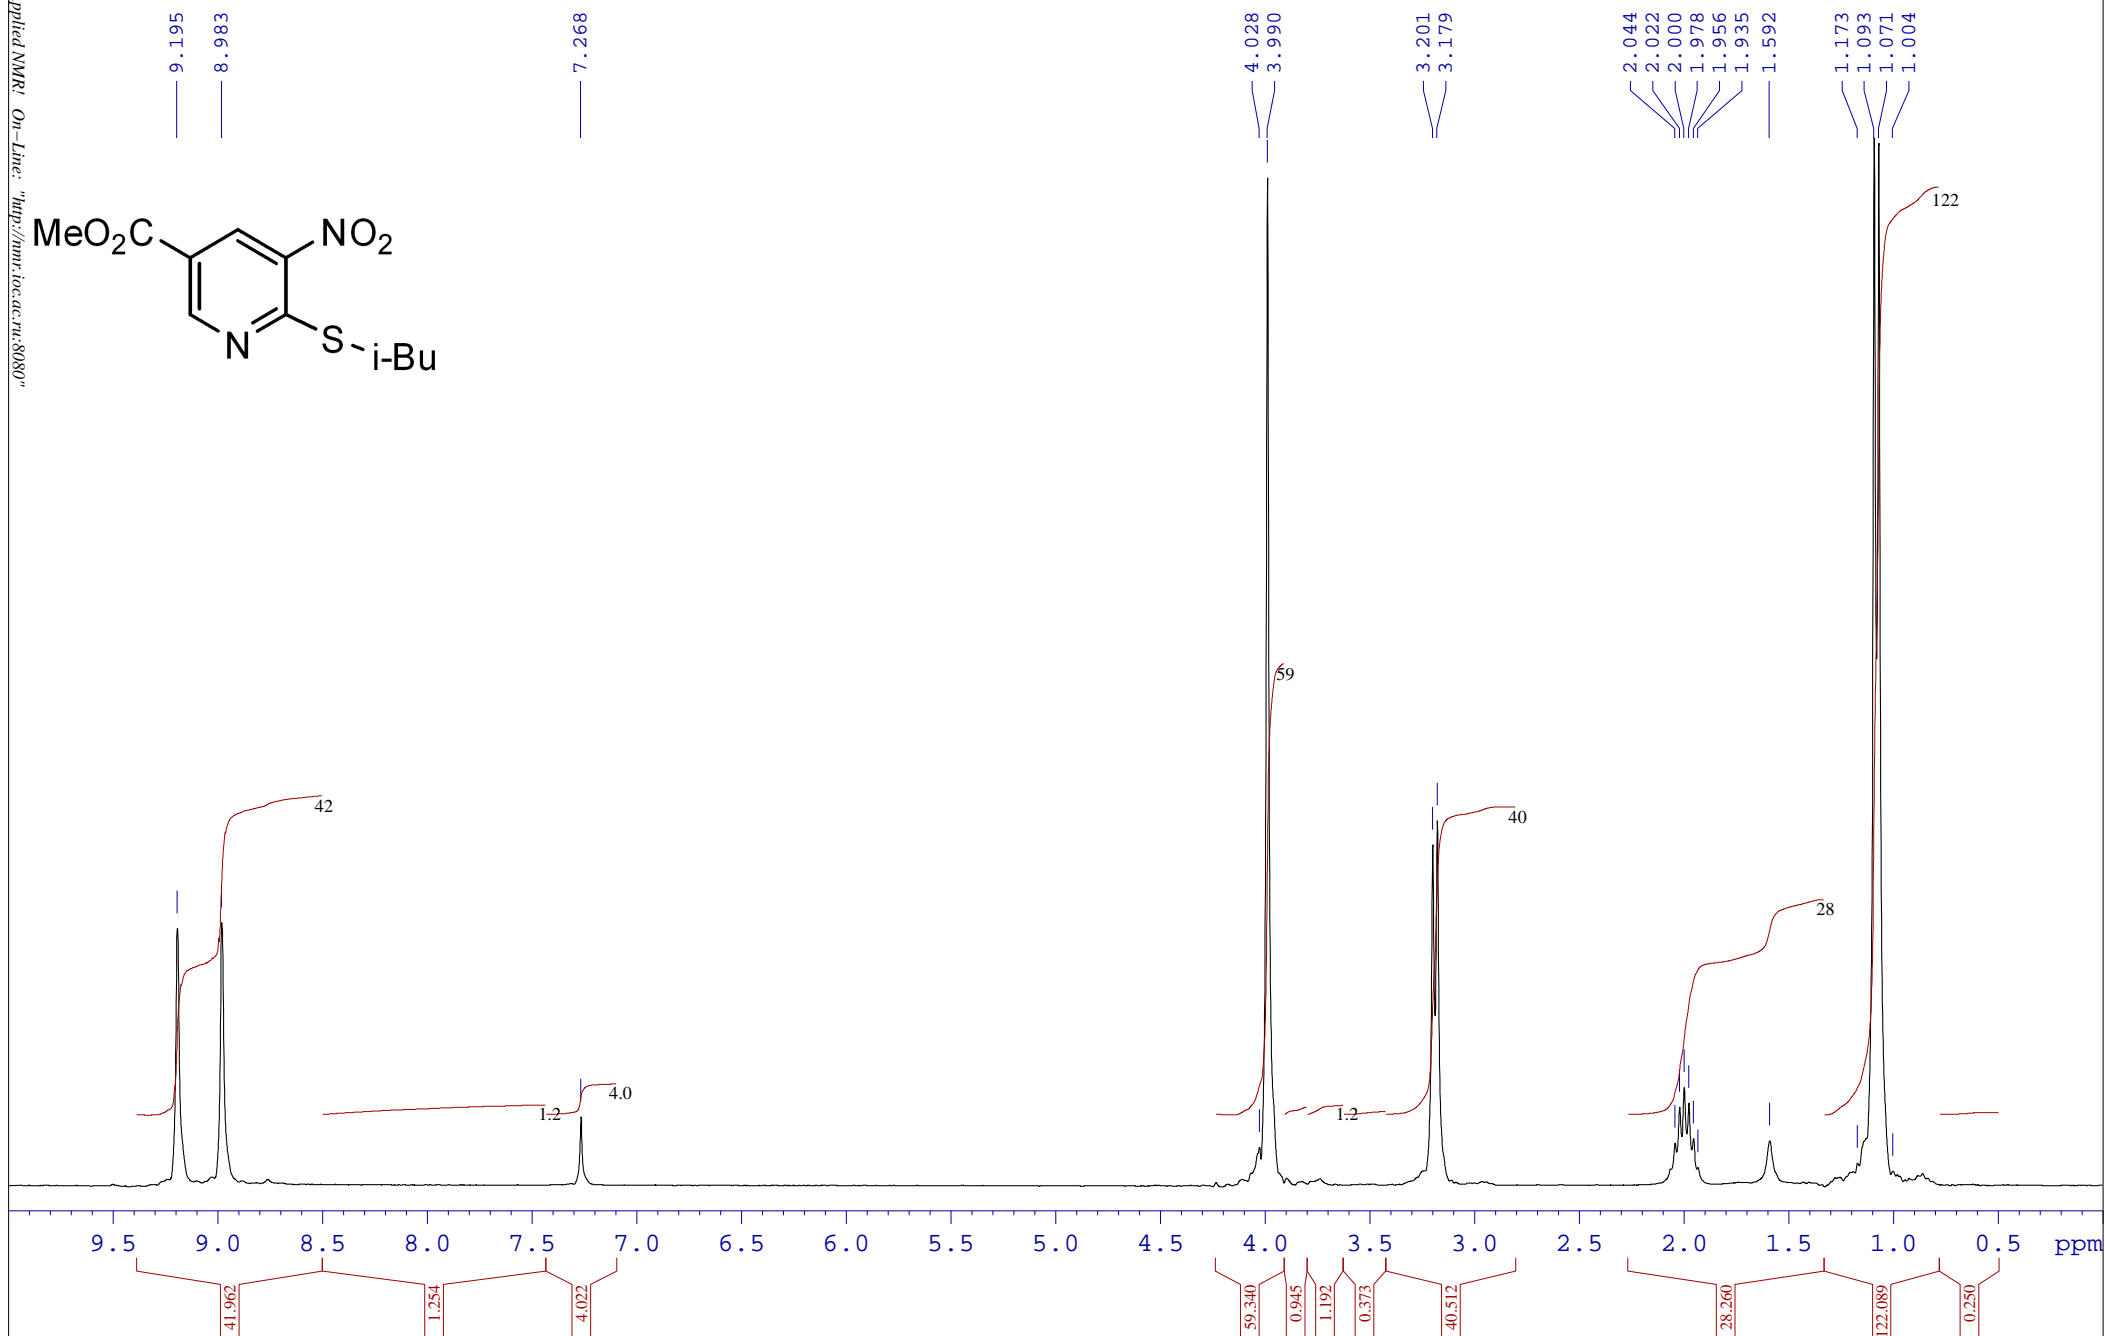



# /LPIK AF-399.13 Kokorekin-20259

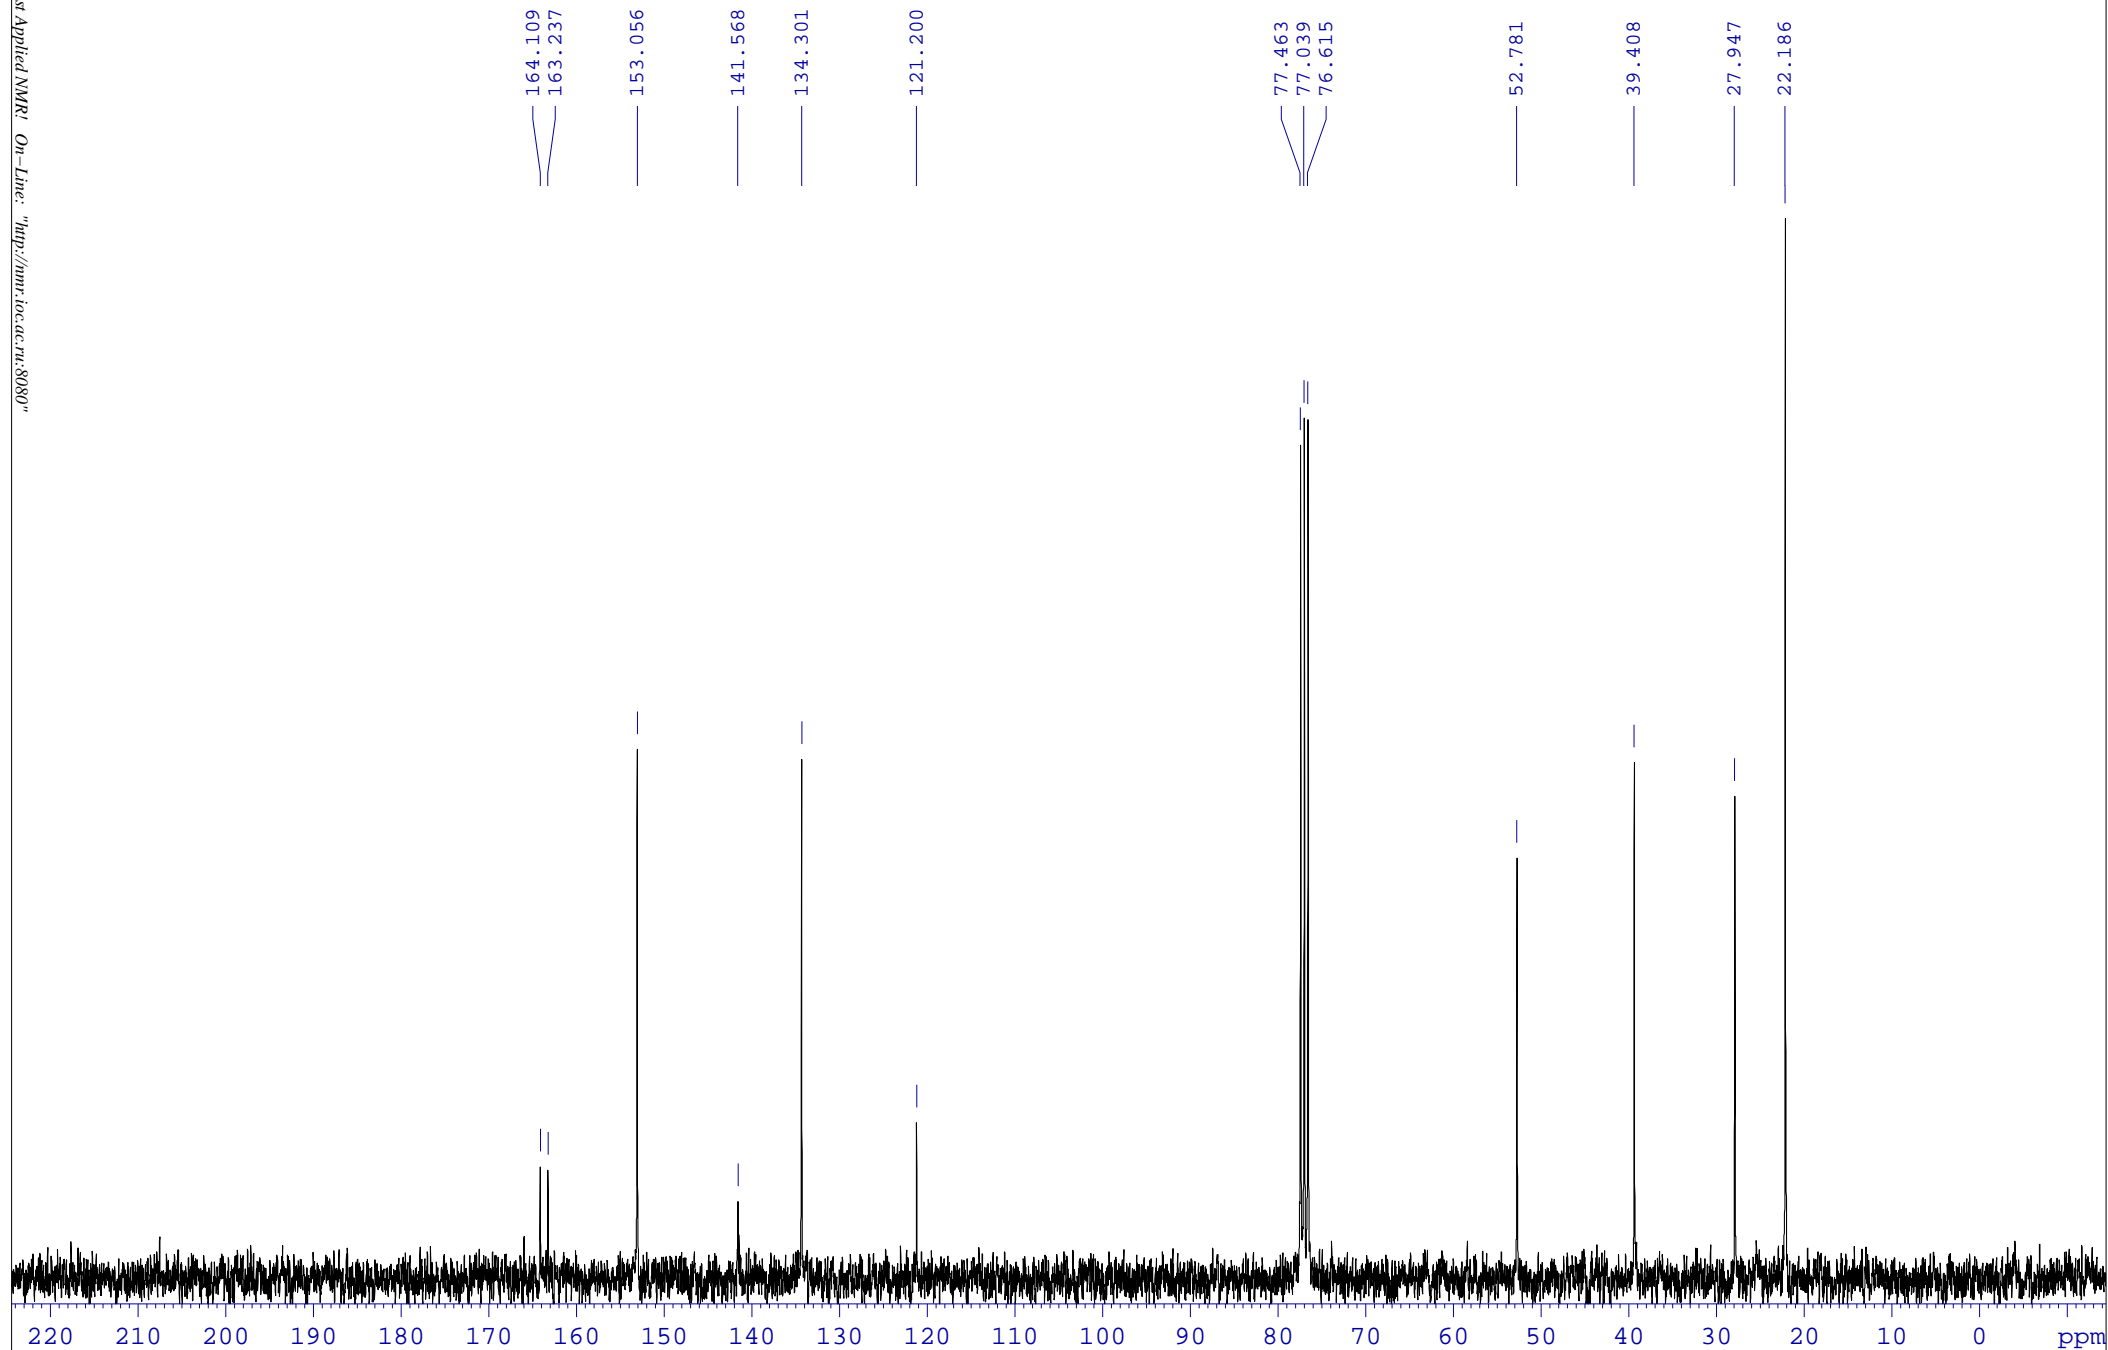

# Display Report

## Analysis Info

Analysis Name D:\Data\Kolotyrkina\2021\Bastrakov\0211022.d  
Method tune\_50-1600.m  
Sample Name /LPIK AF-399  
Comment C11H14N2O4S mH 271.0747 calibrant added CH3OH

Acquisition Date 11.02.2021 12:57:08

Operator BDAL@DE  
Instrument / Ser# micrOTOF 10248

## Acquisition Parameter

|             |            |                      |          |                  |           |
|-------------|------------|----------------------|----------|------------------|-----------|
| Source Type | ESI        | Ion Polarity         | Positive | Set Nebulizer    | 1.0 Bar   |
| Focus       | Not active |                      |          | Set Dry Heater   | 200 °C    |
| Scan Begin  | 50 m/z     | Set Capillary        | 4500 V   | Set Dry Gas      | 4.0 l/min |
| Scan End    | 1600 m/z   | Set End Plate Offset | -500 V   | Set Divert Valve | Waste     |

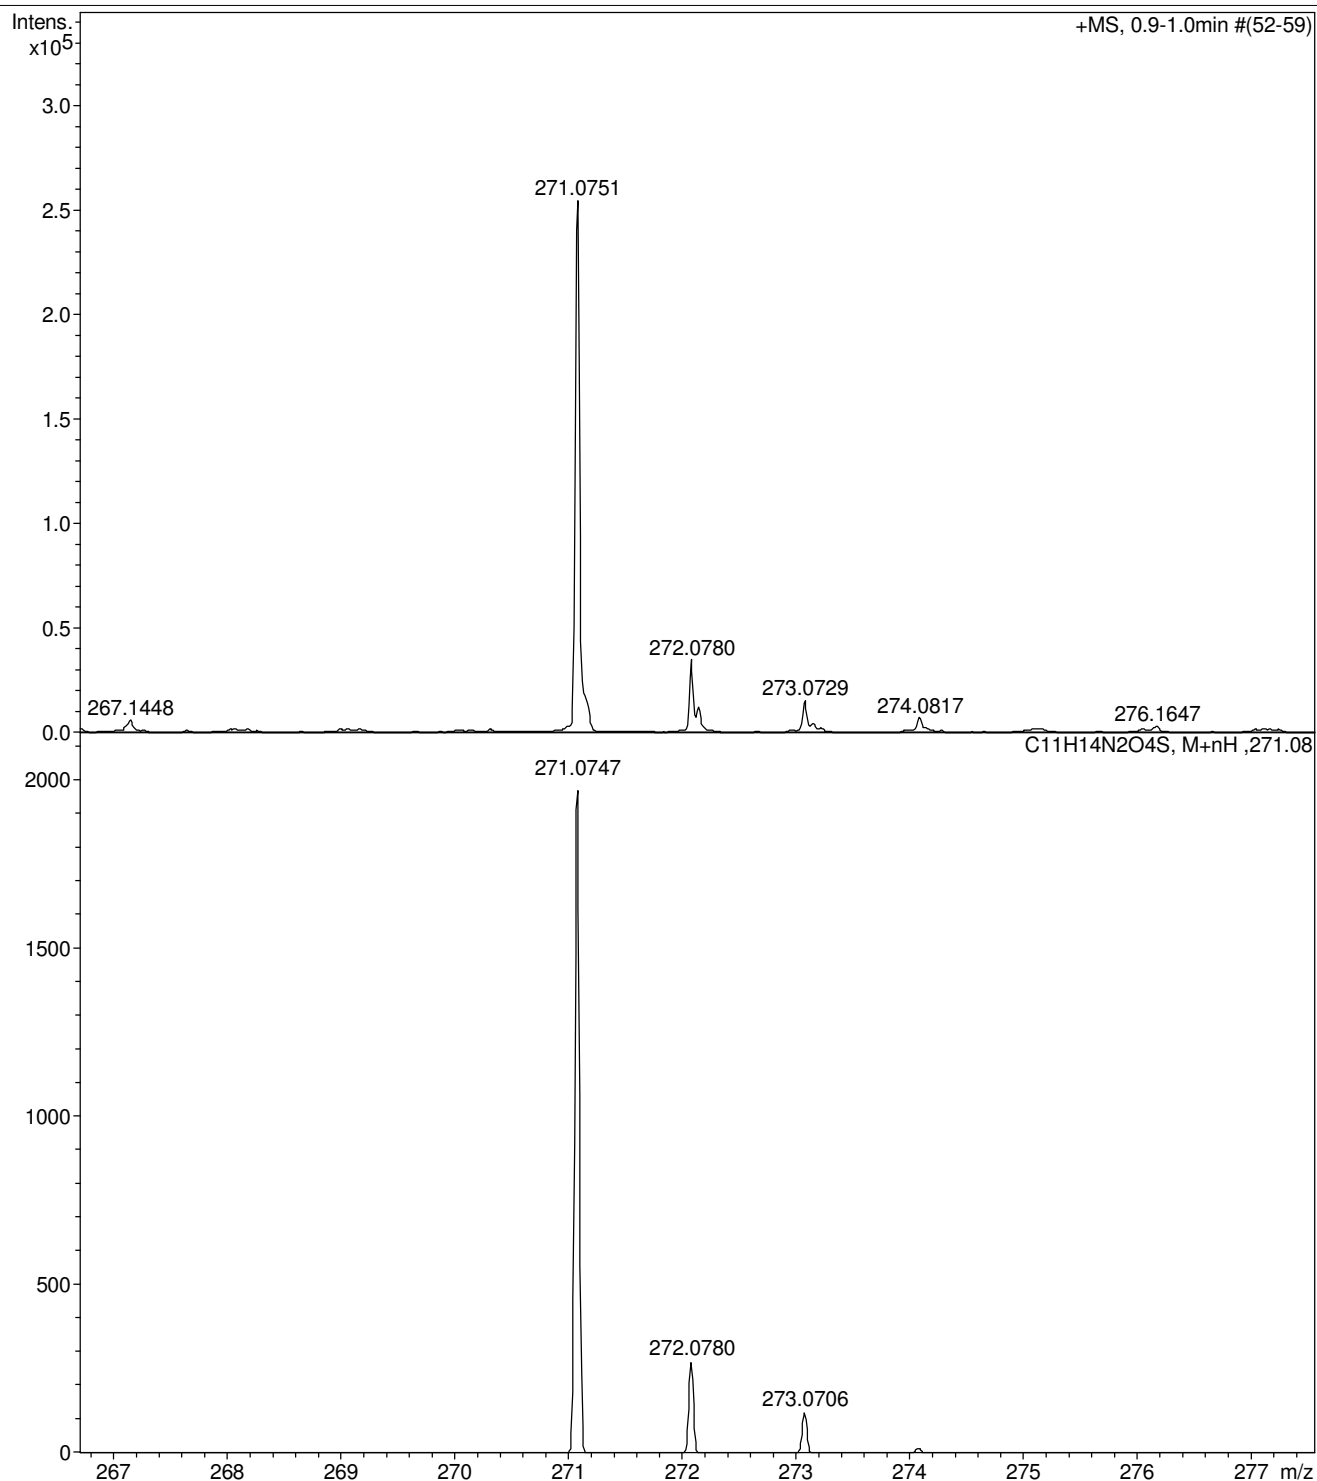



# /LPIK AF-406 Kokorekin-20259

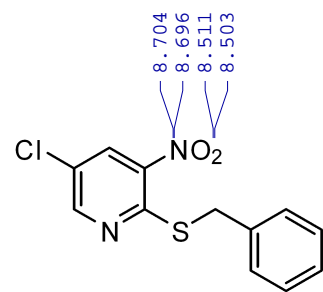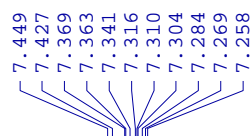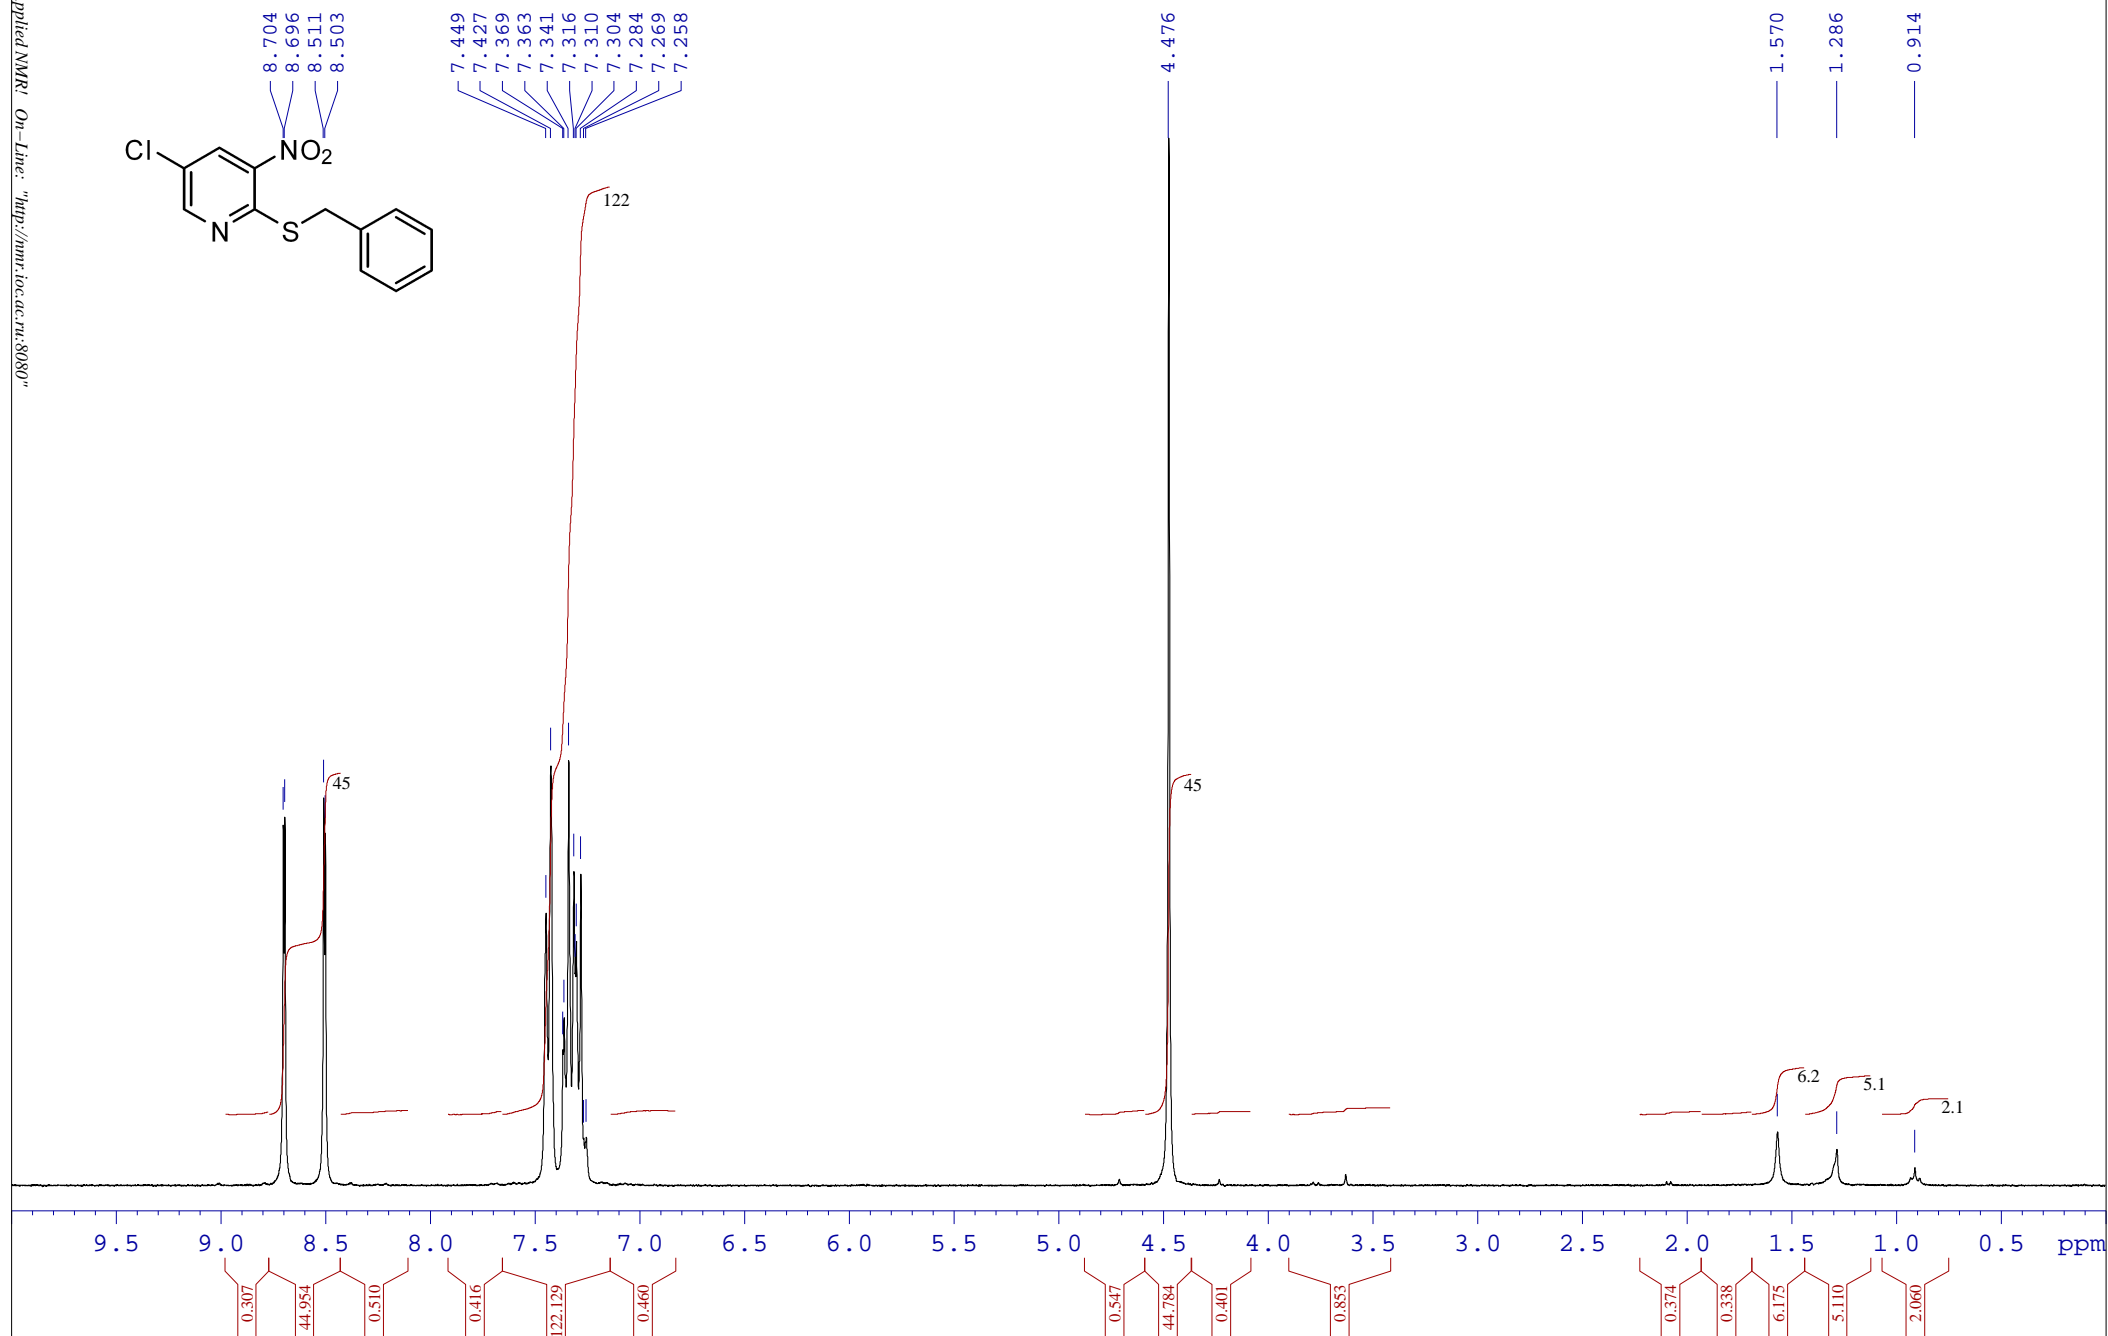





/LPIK AF-406.C15

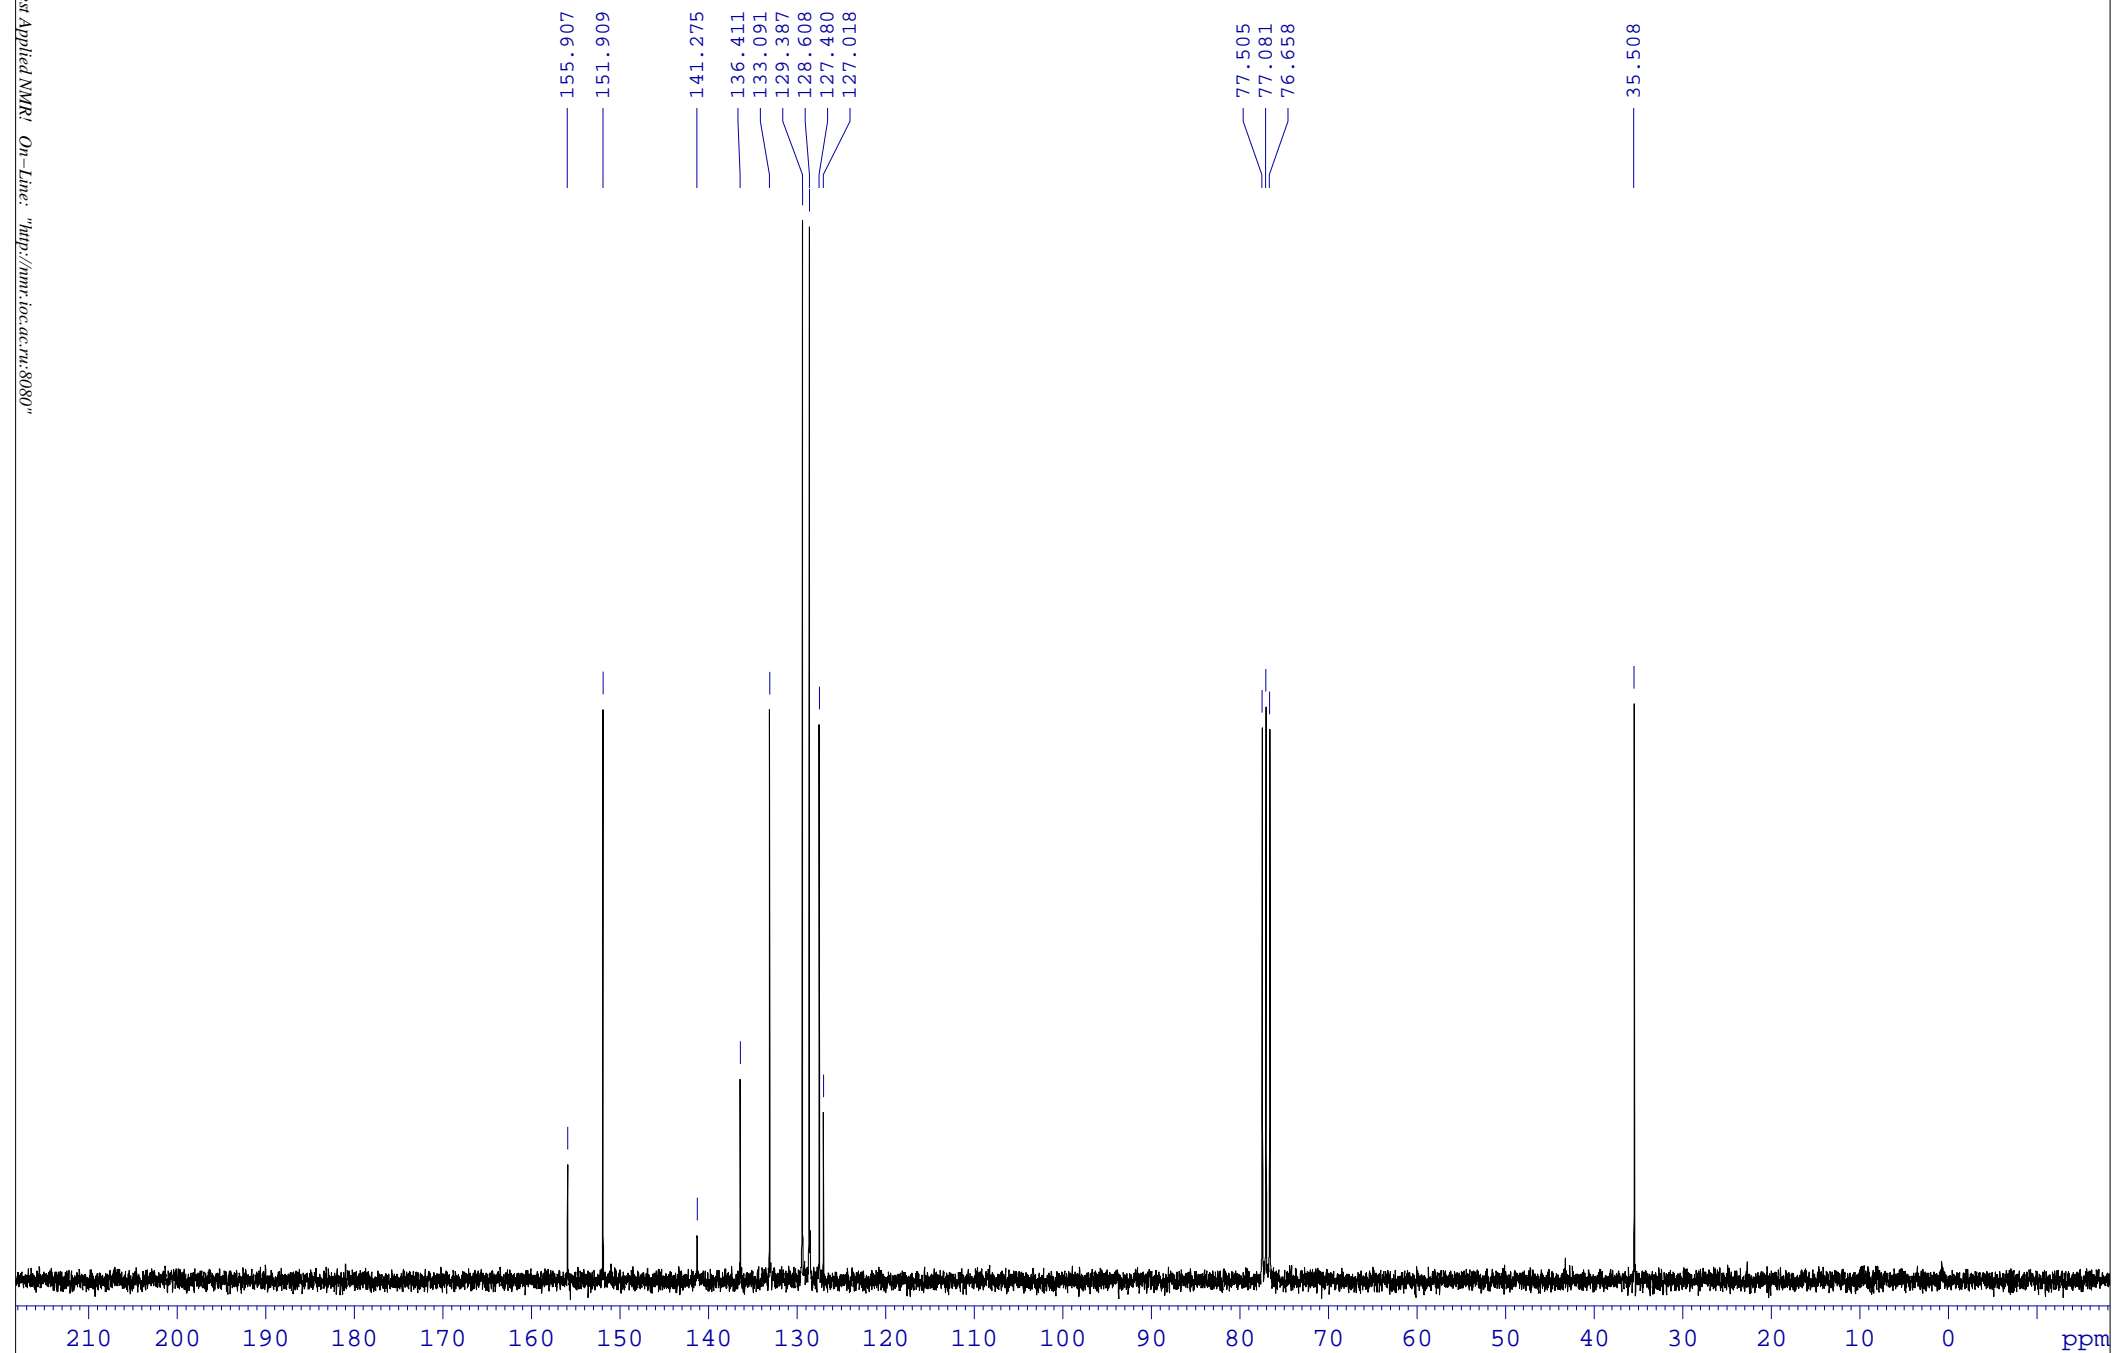

# Display Report

## Analysis Info

Analysis Name D:\Data\Kolotyrkina\2021\Bastrakov\0428019.d  
Method tune\_50-1600.m  
Sample Name /LPIK AF-406  
Comment C12H9CIN2O2S mH 281.0146 clb added CH3OH

Acquisition Date 28.04.2021 12:10:25

Operator BDAL@DE  
Instrument / Ser# micrOTOF 10248

## Acquisition Parameter

|             |            |                      |          |                  |           |
|-------------|------------|----------------------|----------|------------------|-----------|
| Source Type | ESI        | Ion Polarity         | Positive | Set Nebulizer    | 1.0 Bar   |
| Focus       | Not active |                      |          | Set Dry Heater   | 200 °C    |
| Scan Begin  | 50 m/z     | Set Capillary        | 4500 V   | Set Dry Gas      | 4.0 l/min |
| Scan End    | 1600 m/z   | Set End Plate Offset | -500 V   | Set Divert Valve | Waste     |

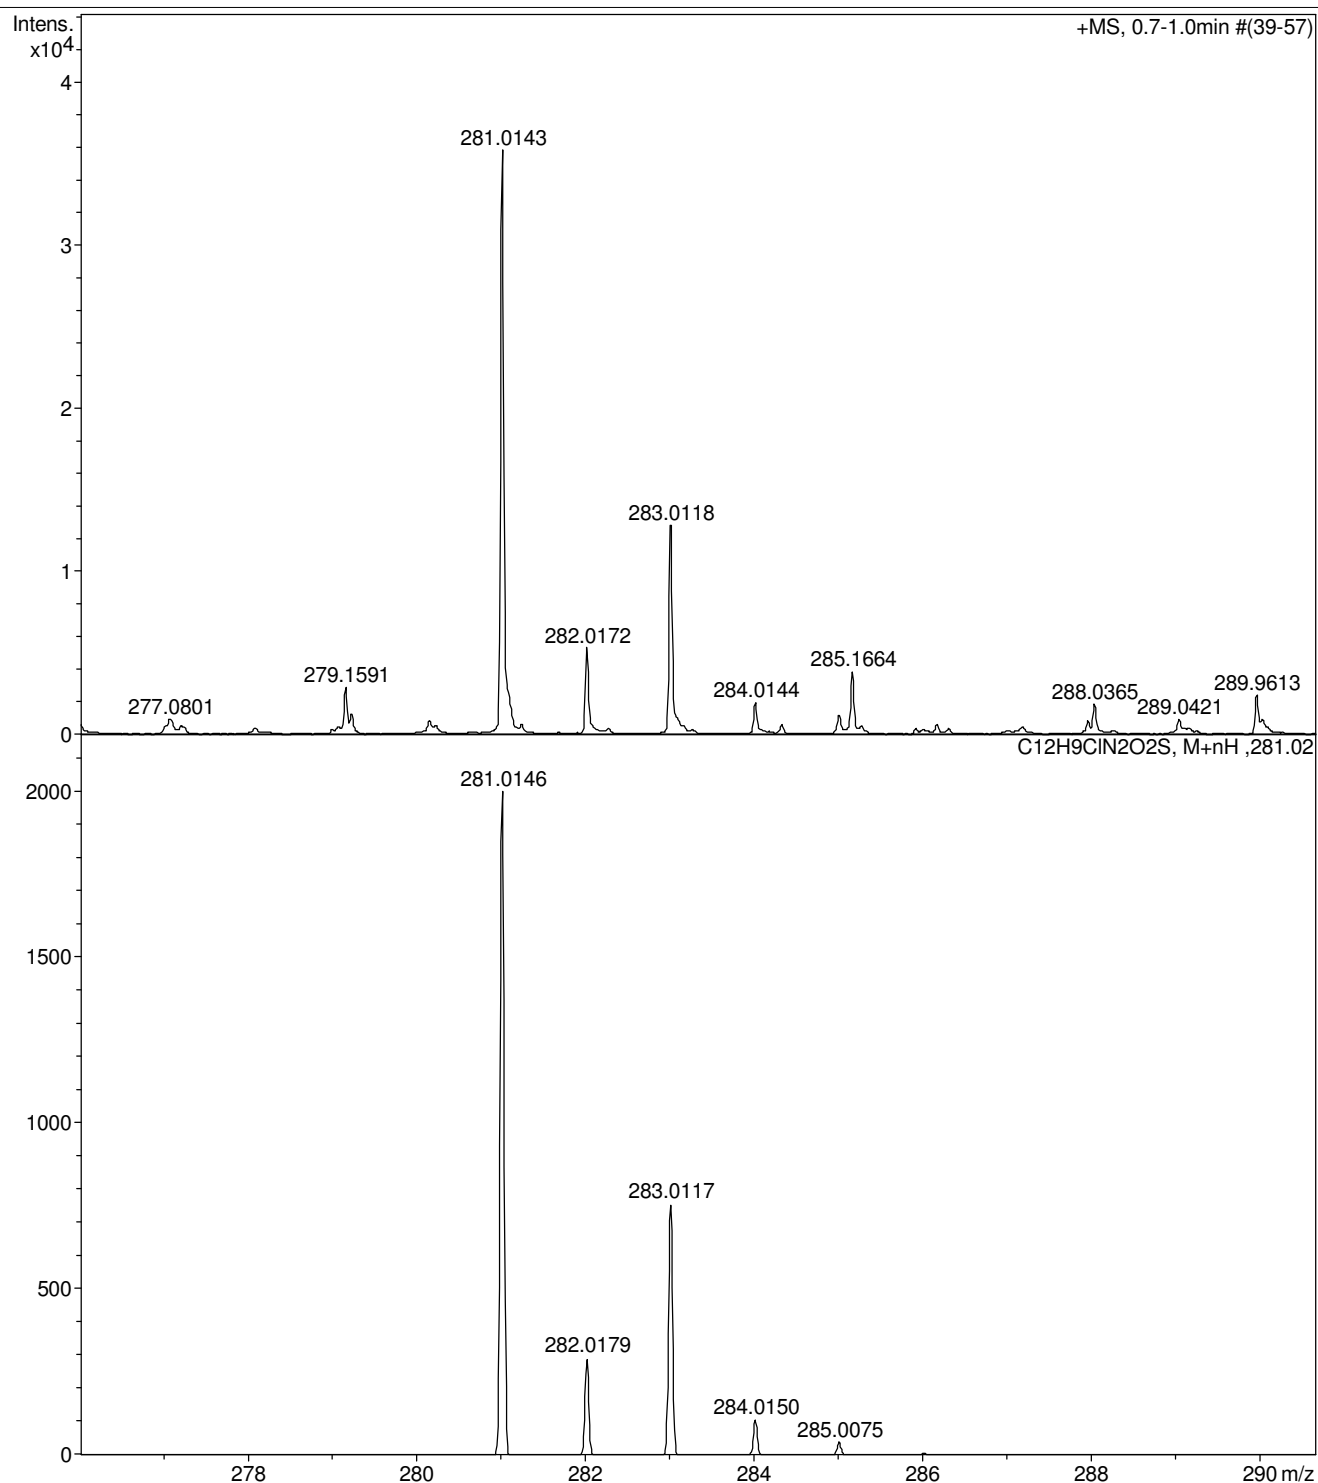



# /LPIK AF-407R

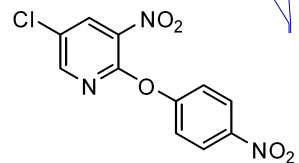

8.445  
8.438  
8.368  
8.339

7.380  
7.350  
7.281

2.027

1.582

1.274

122

61

9.6

12

2.8

1.2

1.1

1.1

9.5 9.0 8.5 8.0 7.5 7.0 6.5 6.0 5.5 5.0 4.5 4.0 3.5 3.0 2.5 2.0 1.5 1.0 0.5 ppm

1.072  
122.125

0.152  
0.387

0.829  
61.032  
9.656

1.142  
0.411

0.229  
0.292  
1.267

12.318  
0.385  
2.797

0.498  
0.925

0.059



/LPIK AF-407.C13

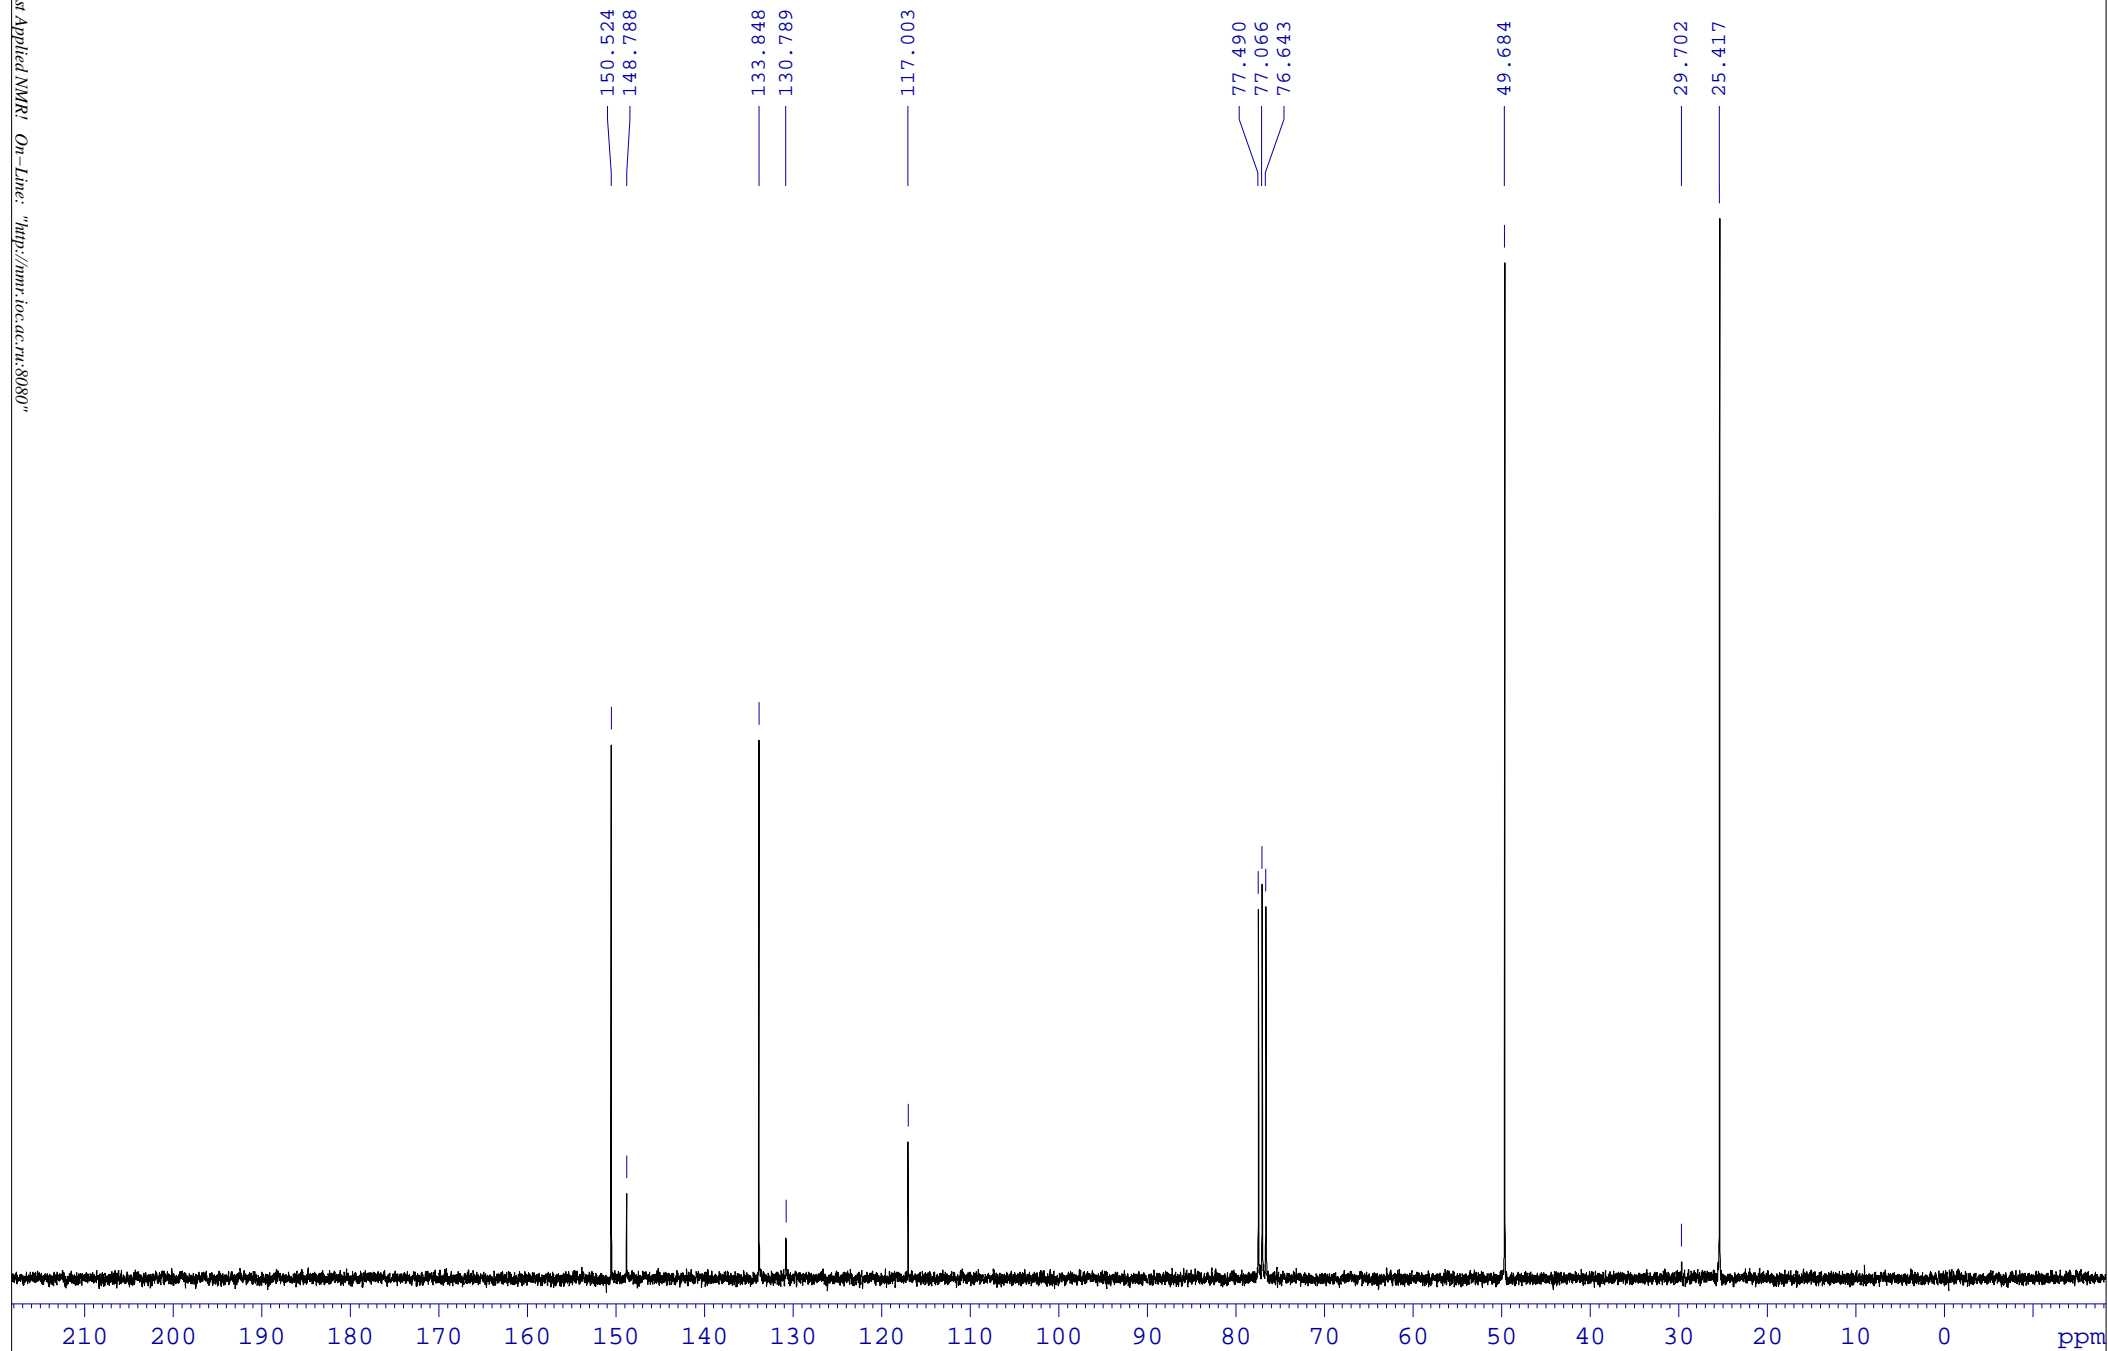

# Display Report

## Analysis Info

Analysis Name D:\Data\Kolotyrkina\2021\Bastrakov\0428020.d  
Method tune\_50-1600.m  
Sample Name /LPIK AF-407  
Comment C11H6ClN3O5 mH 296.0068 clb added CH3OH

Acquisition Date 28.04.2021 12:16:29

Operator BDAL@DE  
Instrument / Ser# micrOTOF 10248

## Acquisition Parameter

|             |            |                      |          |                  |           |
|-------------|------------|----------------------|----------|------------------|-----------|
| Source Type | ESI        | Ion Polarity         | Positive | Set Nebulizer    | 1.0 Bar   |
| Focus       | Not active |                      |          | Set Dry Heater   | 200 °C    |
| Scan Begin  | 50 m/z     | Set Capillary        | 4500 V   | Set Dry Gas      | 4.0 l/min |
| Scan End    | 1600 m/z   | Set End Plate Offset | -500 V   | Set Divert Valve | Waste     |

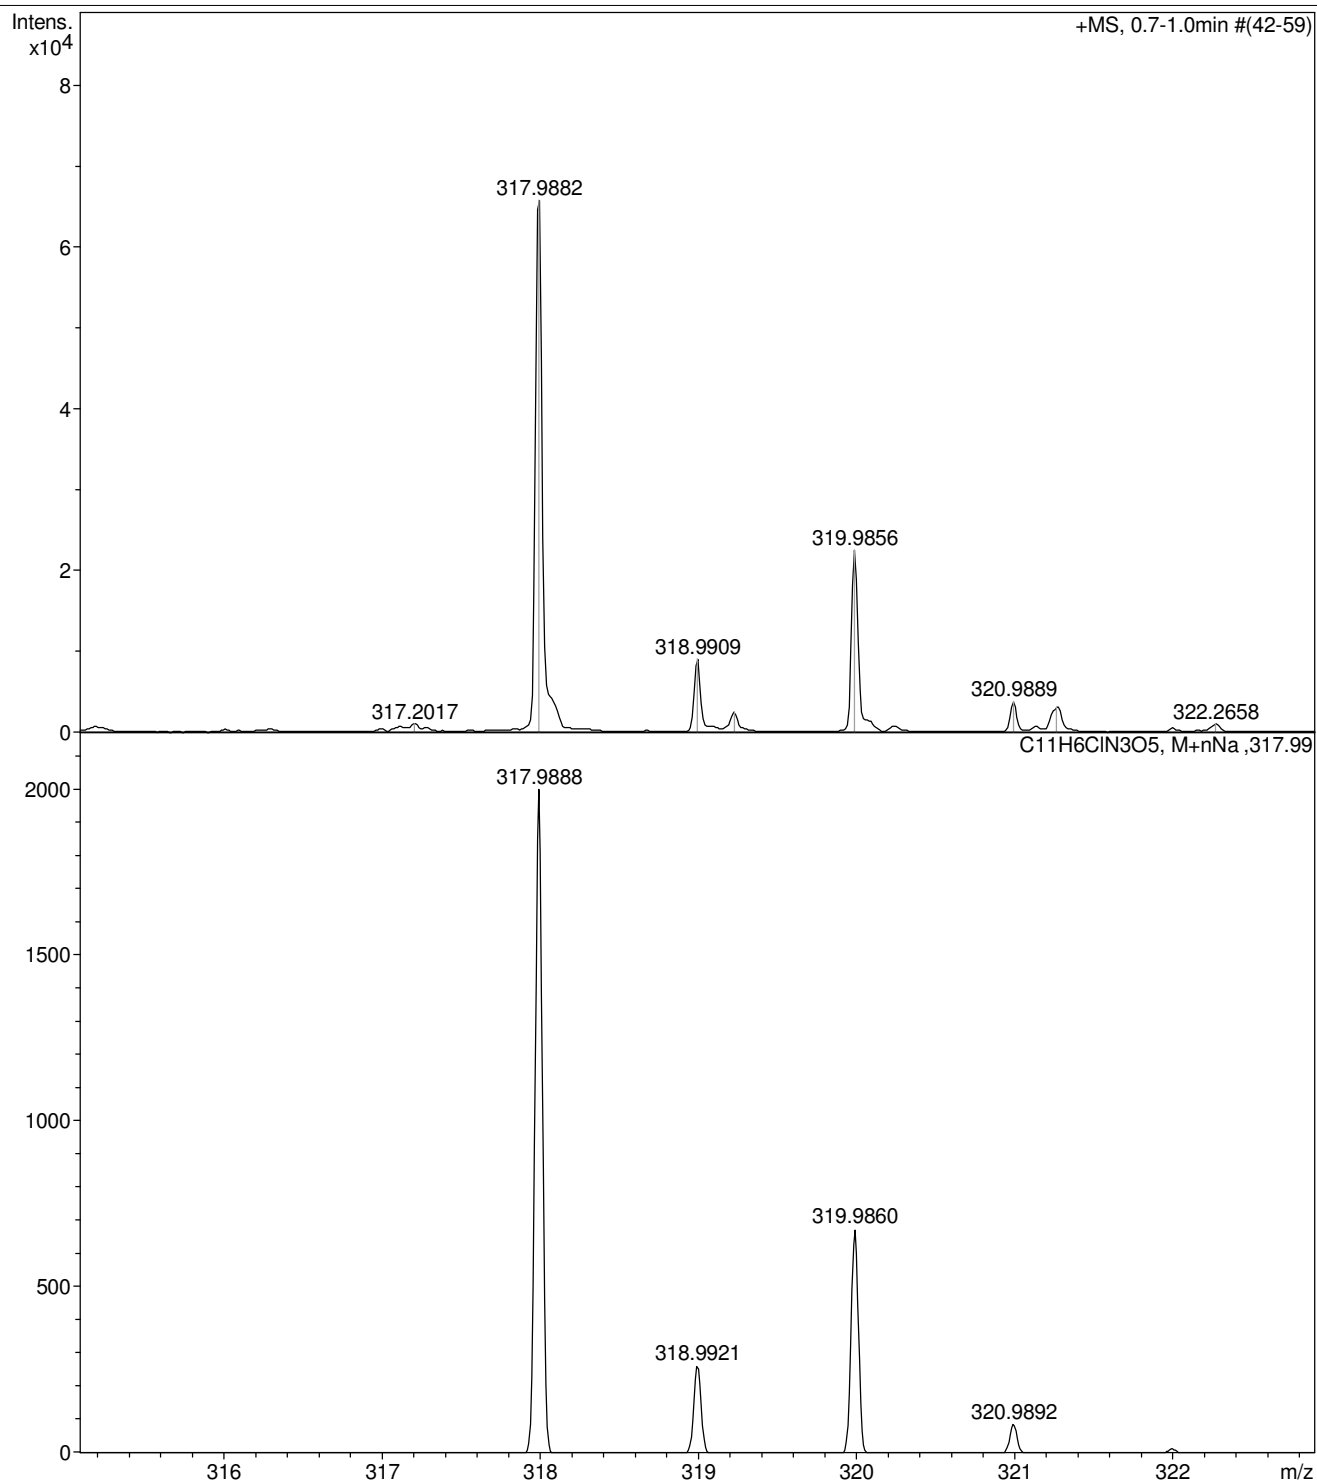



# /LPIK AF-408 Kokorekin-20259

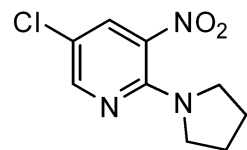

8.290  
8.282  
8.096  
8.088

7.284

4.697

3.418  
3.396  
3.374

2.047  
2.027  
2.015  
2.005  
1.996  
1.983  
1.609  
1.275

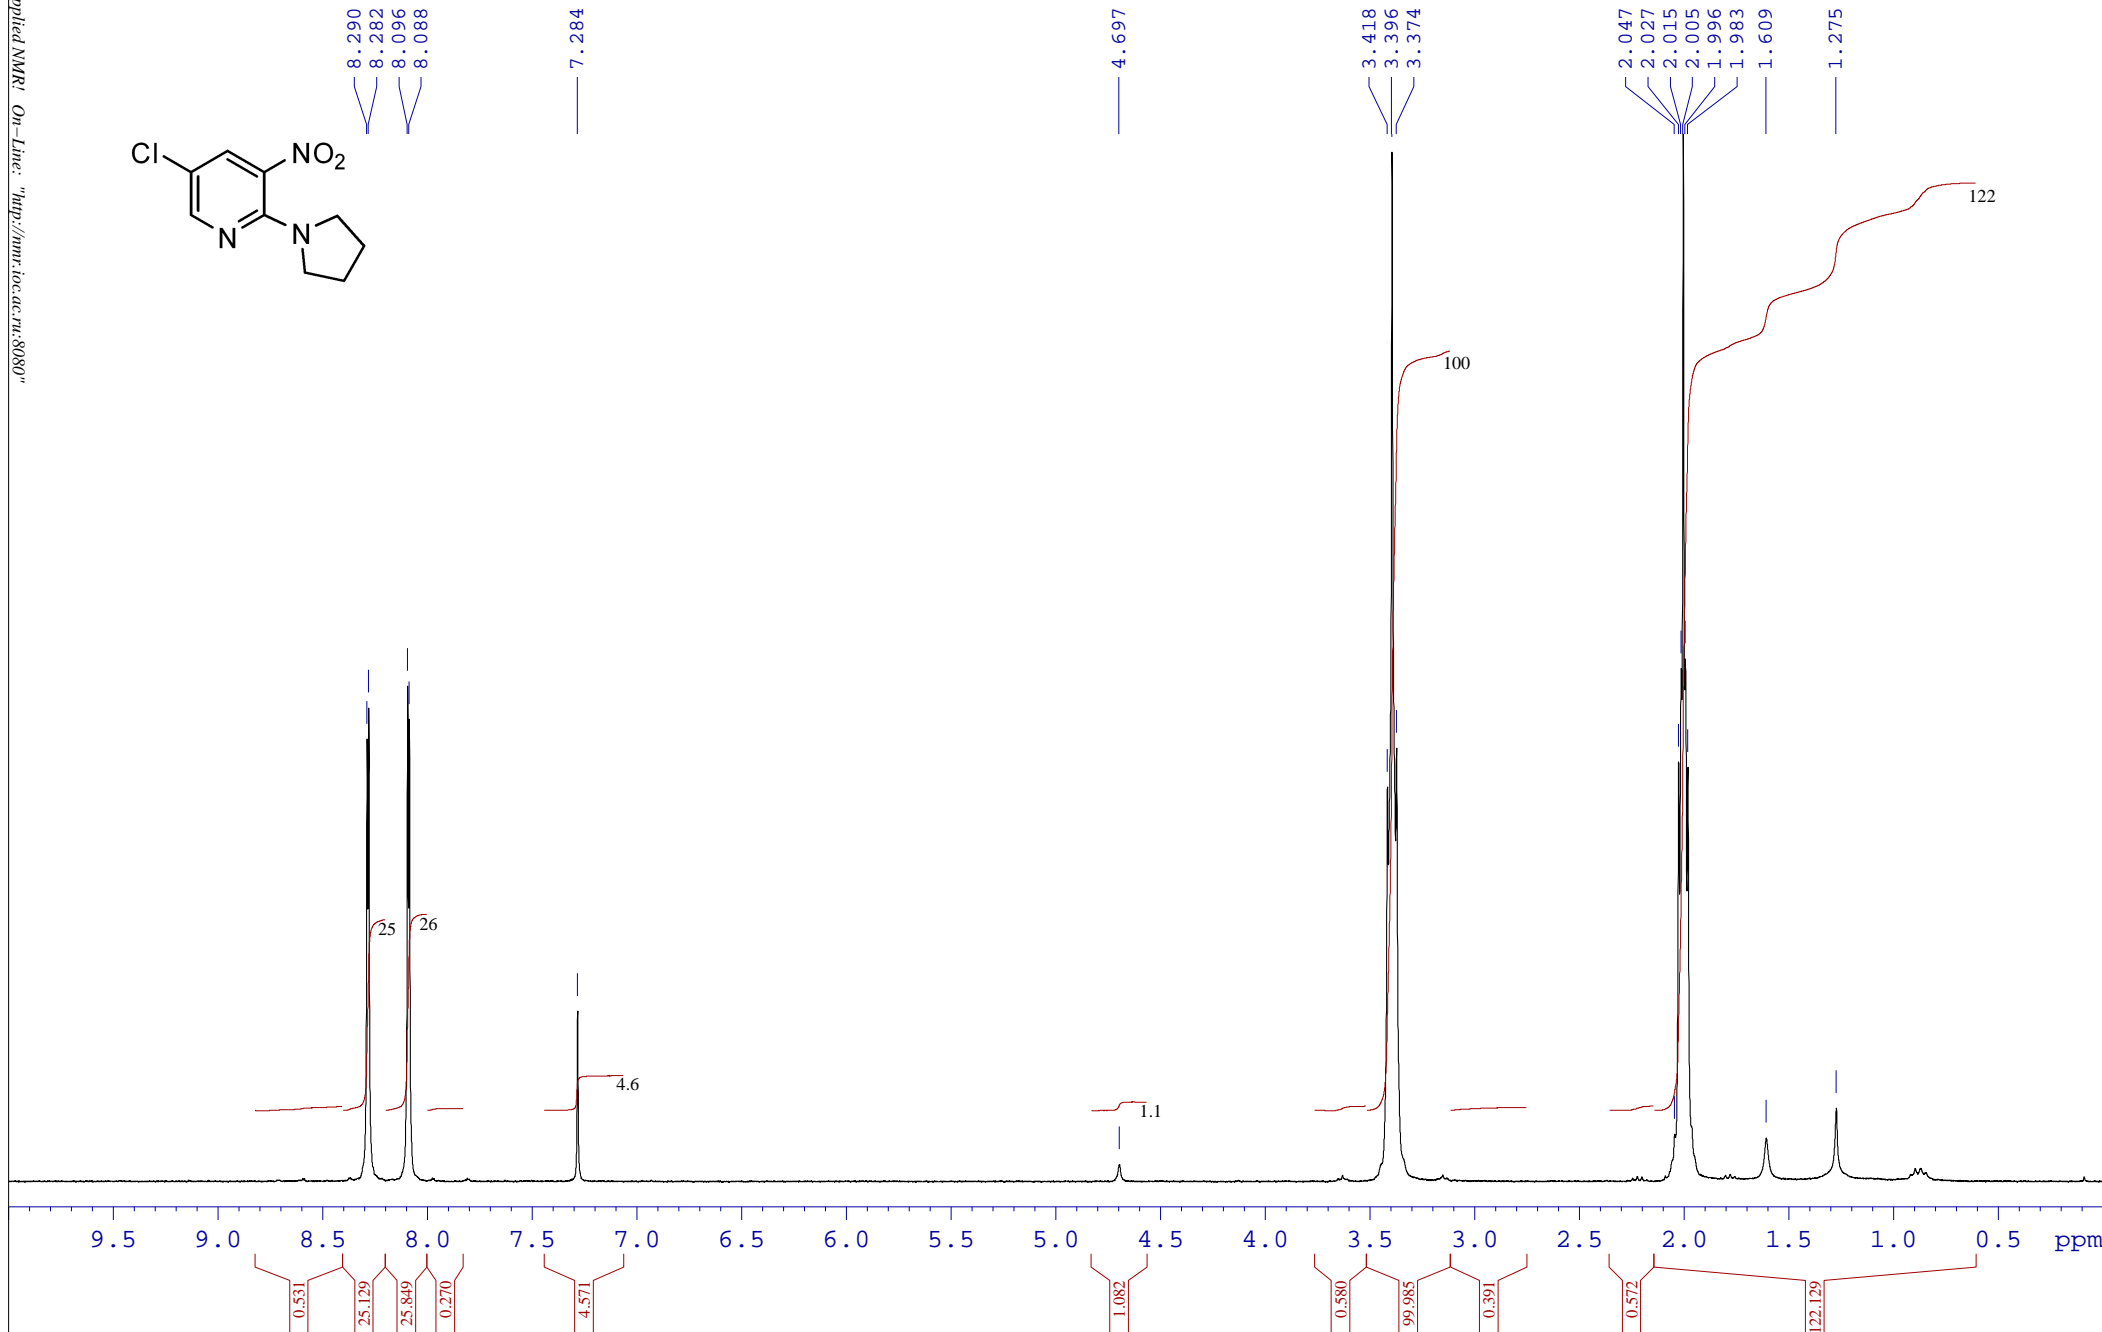

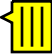

/LPIK AF-408.C13

157.228  
152.992  
150.234  
145.351  
135.449  
134.325  
126.870  
125.612  
122.161  
77.468  
77.045  
76.621

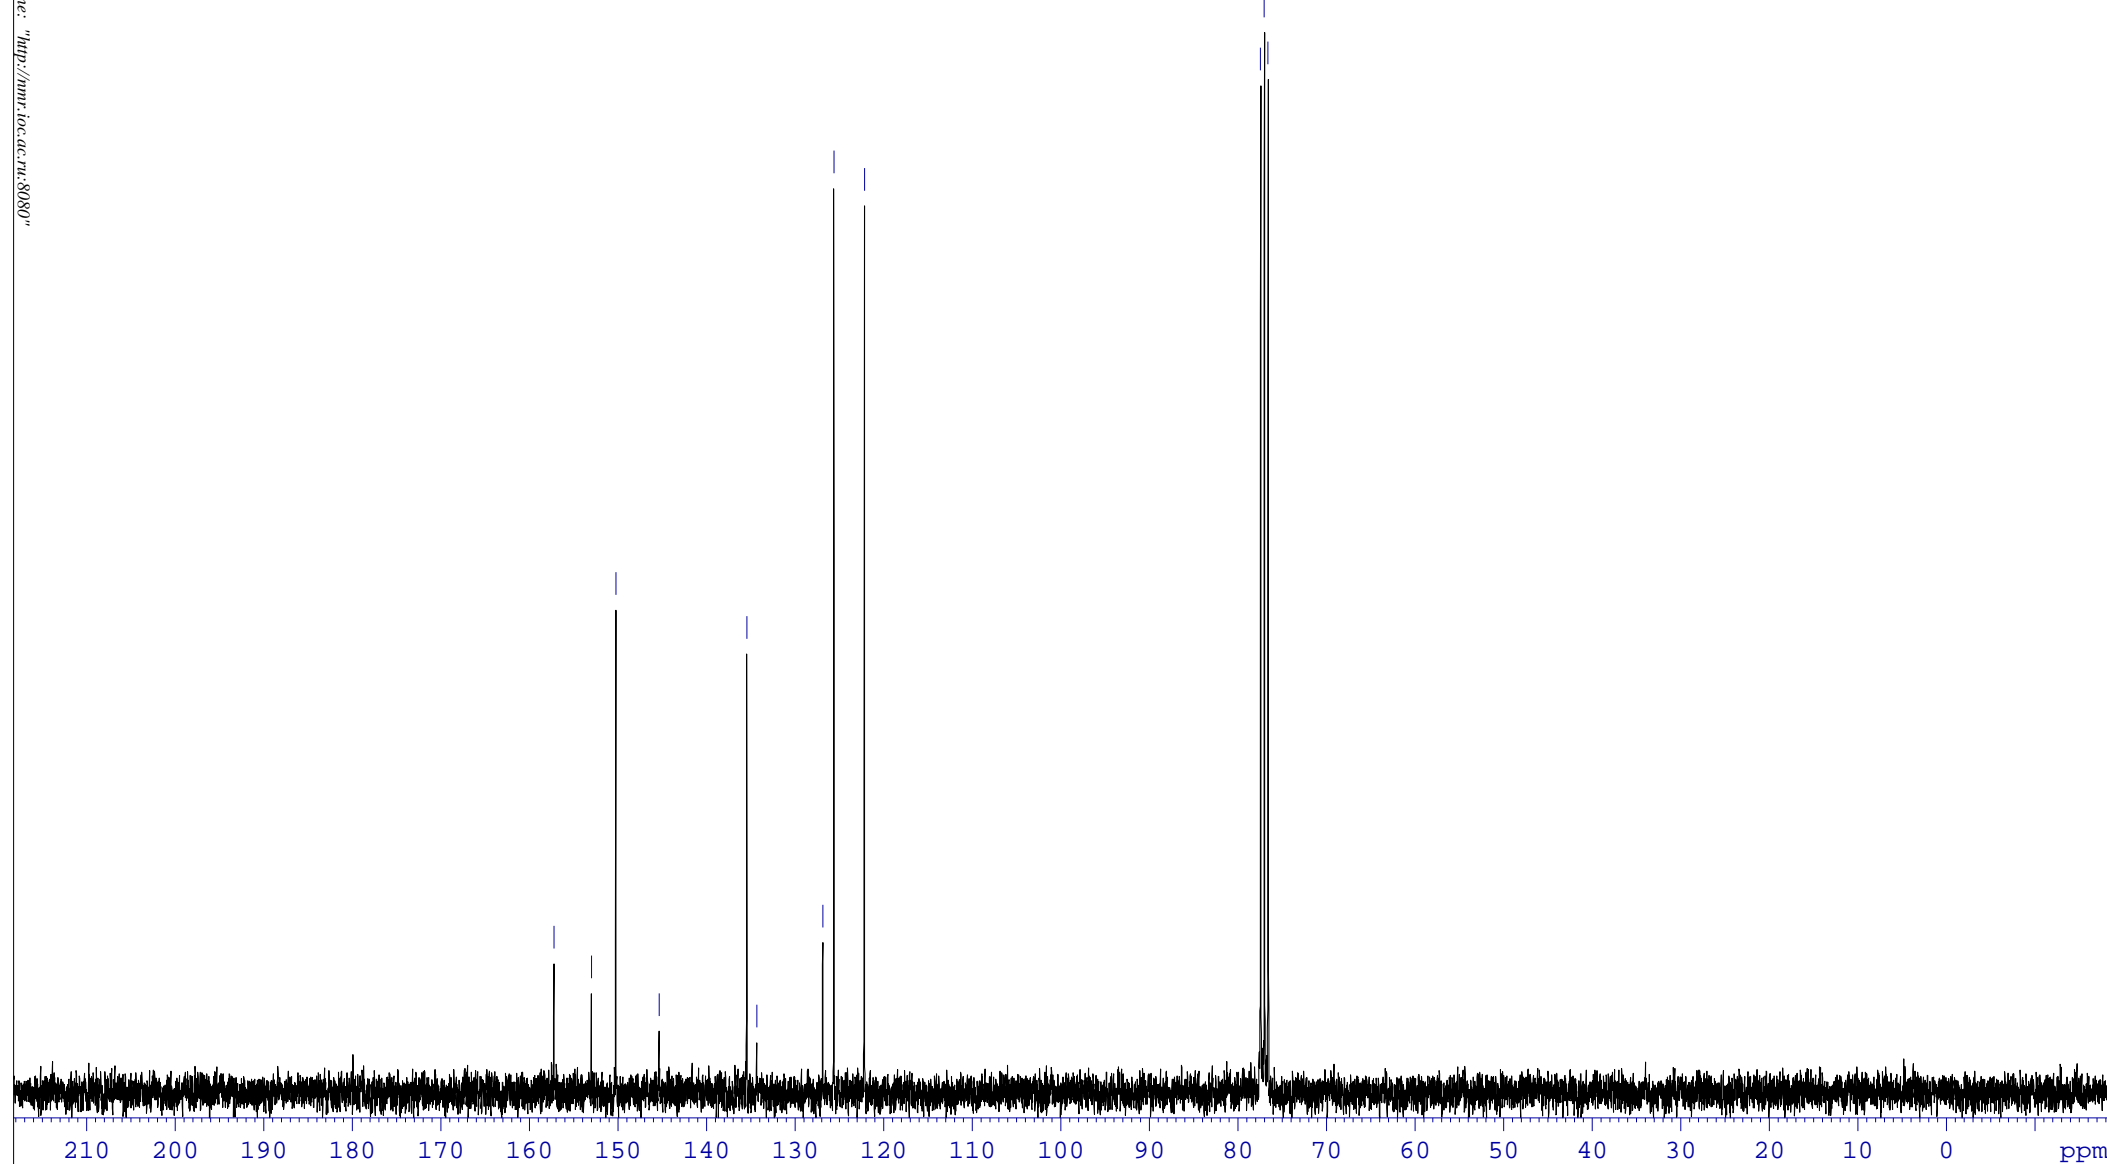

# Display Report

## Analysis Info

Analysis Name D:\Data\Kolotyrkina\2021\Bastrakov\0428021.d  
Method tune\_50-1600.m  
Sample Name /LPIK AF-408  
Comment C9H10CIN3O2 mH 228.0534 clb added CH3OH

Acquisition Date 28.04.2021 12:28:48

Operator BDAL@DE  
Instrument / Ser# micrOTOF 10248

## Acquisition Parameter

|             |            |                      |          |                  |           |
|-------------|------------|----------------------|----------|------------------|-----------|
| Source Type | ESI        | Ion Polarity         | Positive | Set Nebulizer    | 1.0 Bar   |
| Focus       | Not active |                      |          | Set Dry Heater   | 200 °C    |
| Scan Begin  | 50 m/z     | Set Capillary        | 4500 V   | Set Dry Gas      | 4.0 l/min |
| Scan End    | 1600 m/z   | Set End Plate Offset | -500 V   | Set Divert Valve | Waste     |

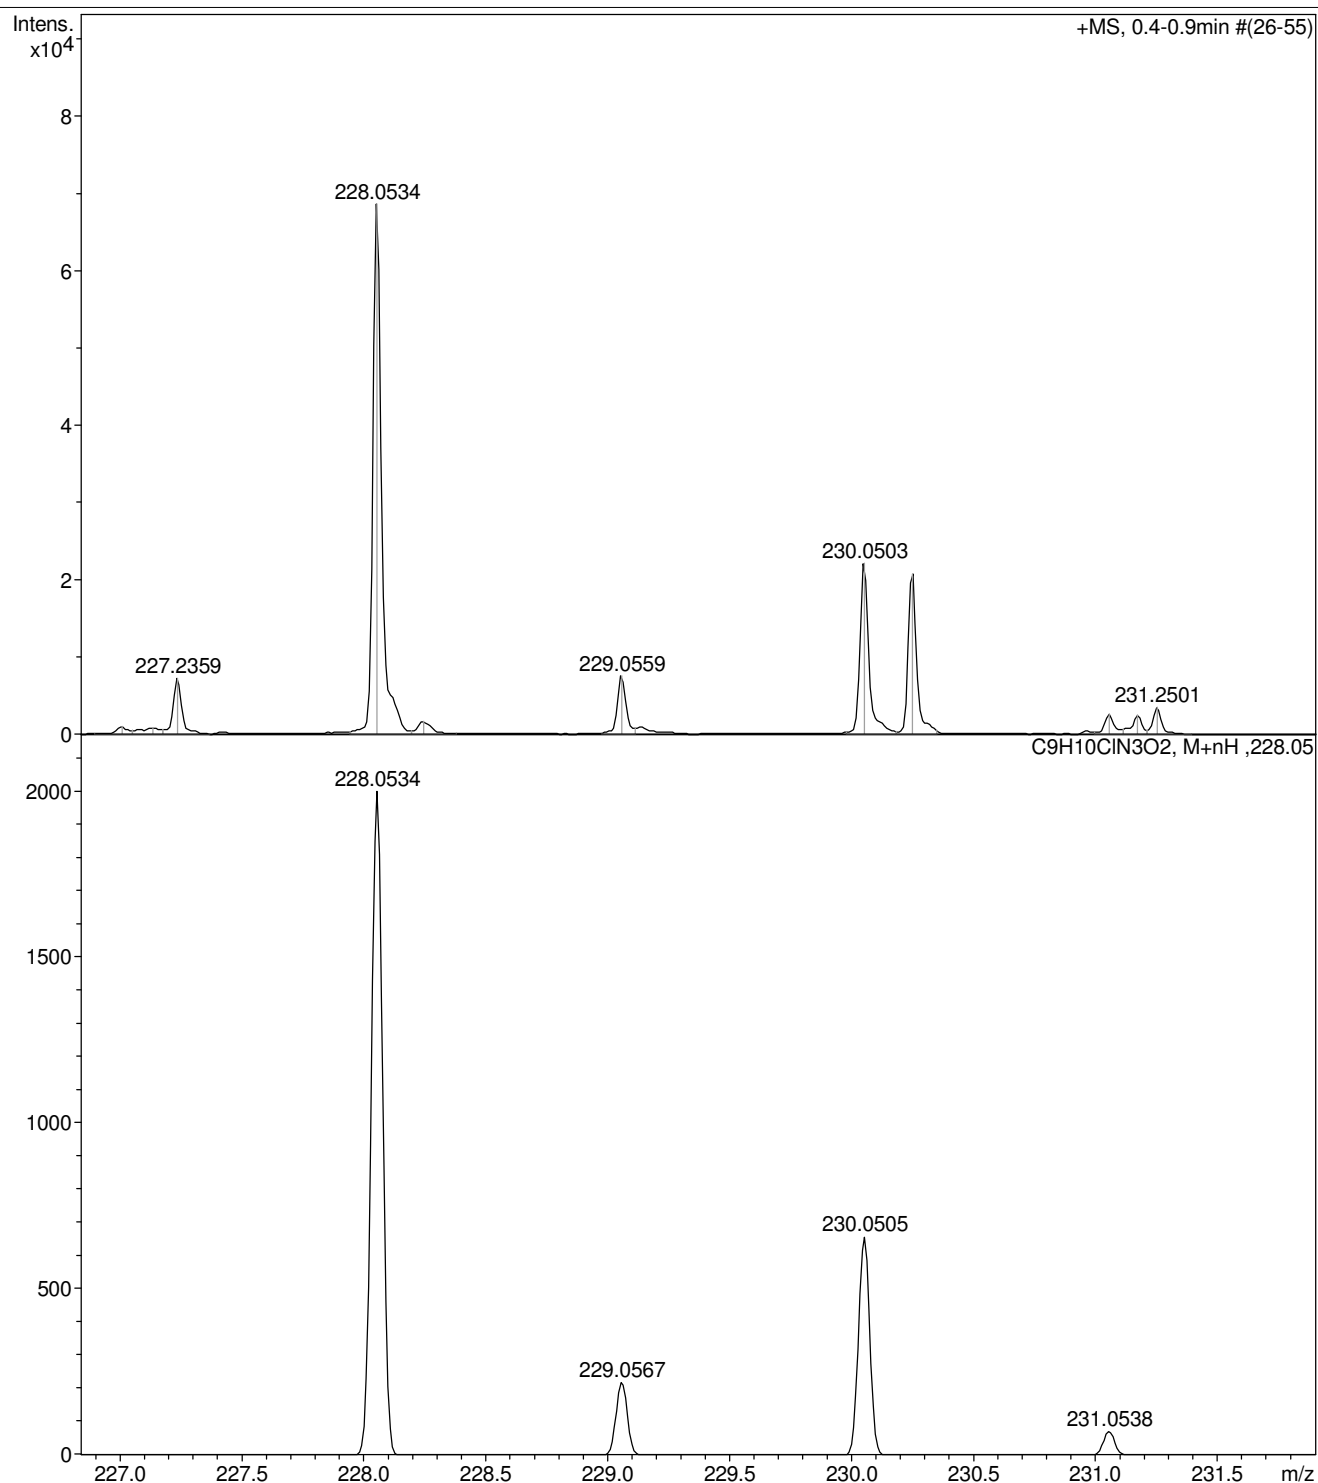





/LPIK AF-416

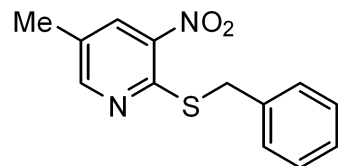

8.577

8.325

7.457

7.433

7.349

7.326

7.302

7.282

7.262

7.250

4.482

3.626

3.512

2.472

2.431

1.586

122

38

59

19

20

6.5

1.2

7.7

9.5 9.0 8.5 8.0 7.5 7.0 6.5 6.0 5.5 5.0 4.5 4.0 3.5 3.0 2.5 2.0 1.5 1.0 0.5 ppm

0.432

19.215

1.147

19.709

1.089

0.365

122.134

0.541

0.361

37.972

0.496

0.434

6.508

1.211

0.406

0.515

59.256

0.672

0.391

0.352

7.736

0.735

0.280

0.404



# /LPIK AF-416.13 Kokorekin-20259

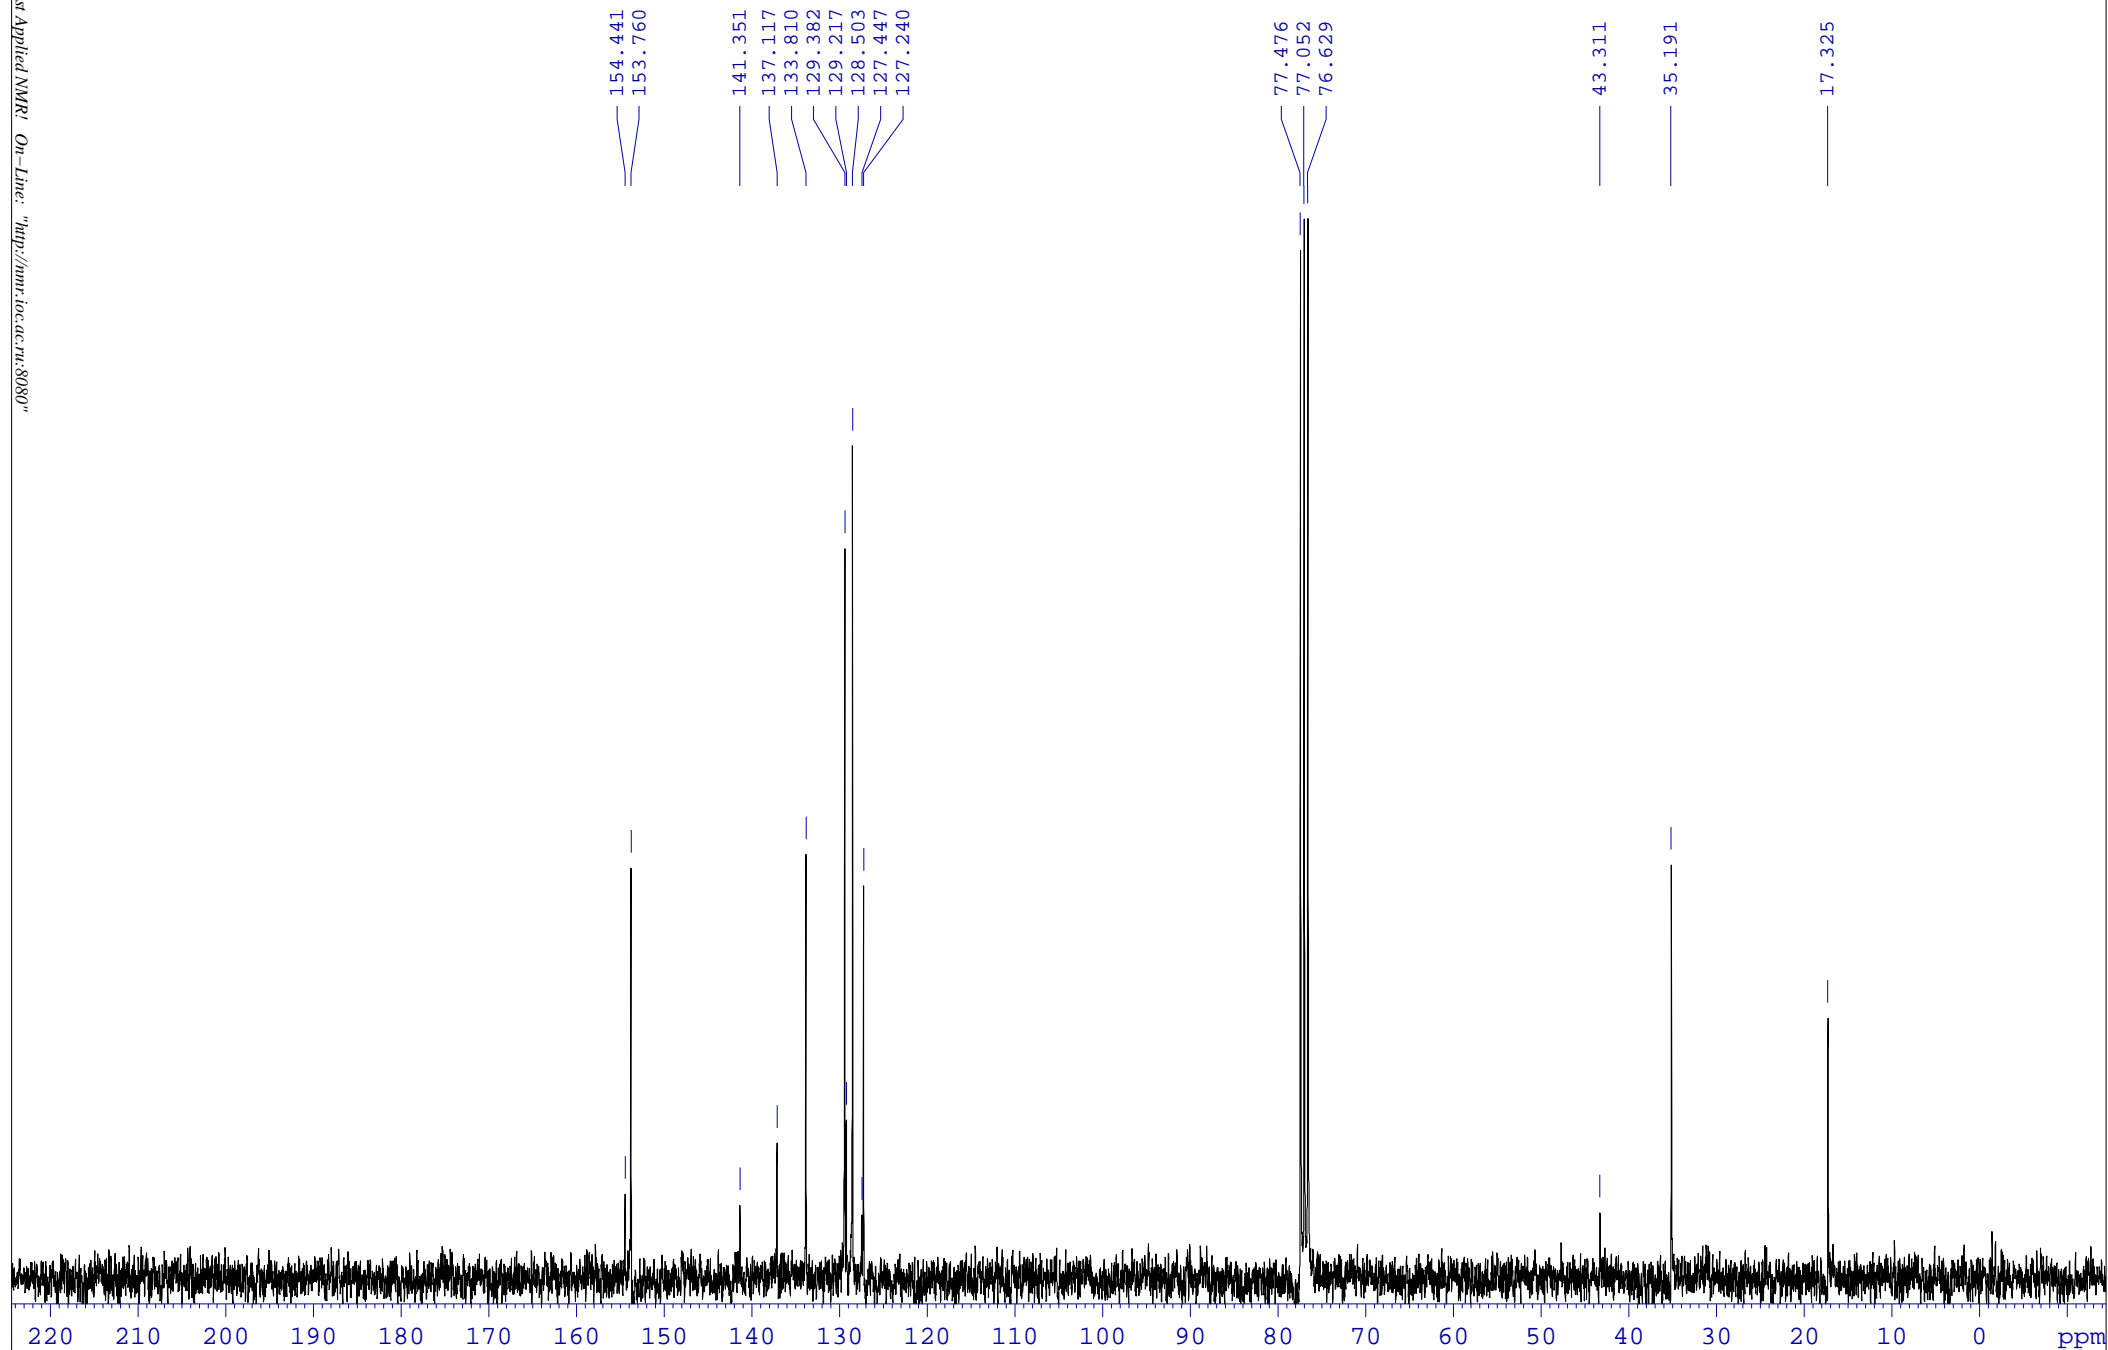

# Display Report

## Analysis Info

Analysis Name D:\Data\Kolotyrkina\2021\Bastrakov\0428022.d  
Method tune\_50-1600.m  
Sample Name /LPIK AF-416  
Comment C13H12N2O2S mH 261.0692 clb added CH3OH

Acquisition Date 28.04.2021 12:33:48

Operator BDAL@DE  
Instrument / Ser# micrOTOF 10248

## Acquisition Parameter

|             |            |                      |          |                  |           |
|-------------|------------|----------------------|----------|------------------|-----------|
| Source Type | ESI        | Ion Polarity         | Positive | Set Nebulizer    | 1.0 Bar   |
| Focus       | Not active |                      |          | Set Dry Heater   | 200 °C    |
| Scan Begin  | 50 m/z     | Set Capillary        | 4500 V   | Set Dry Gas      | 4.0 l/min |
| Scan End    | 1600 m/z   | Set End Plate Offset | -500 V   | Set Divert Valve | Waste     |

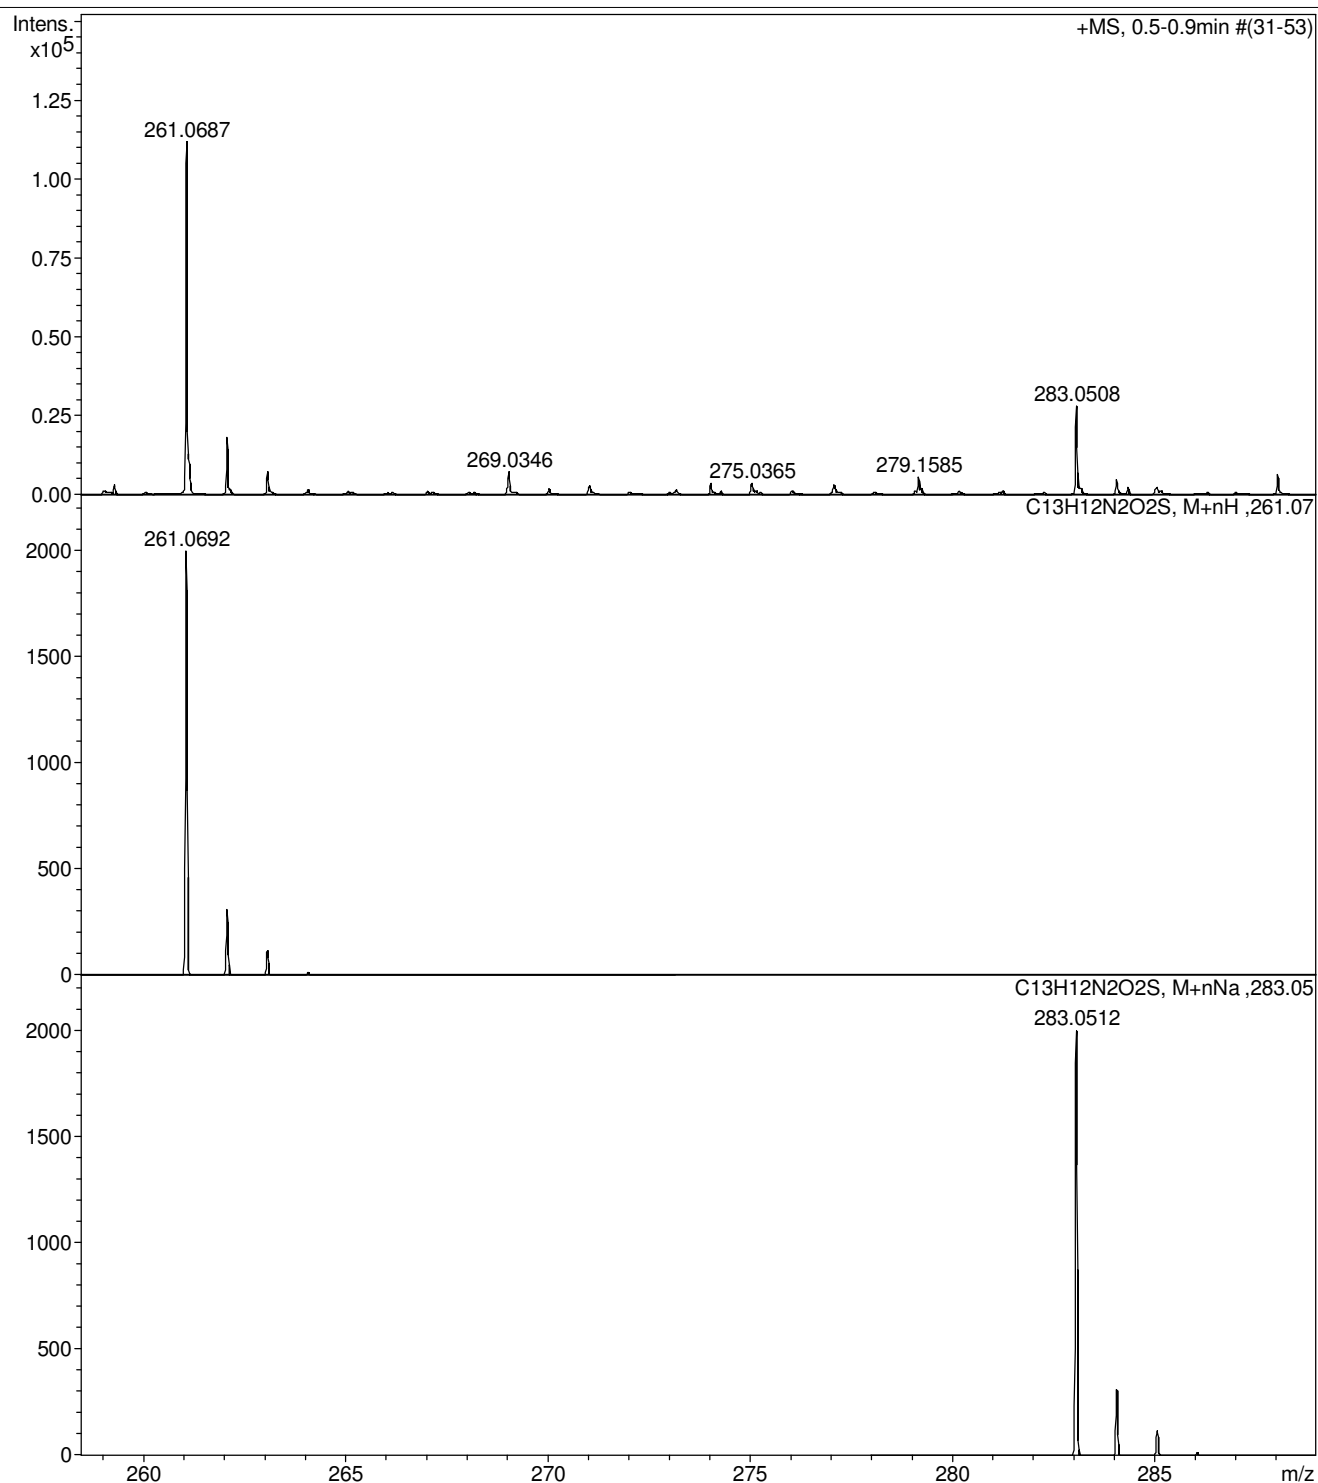



/LPIK AF\_421

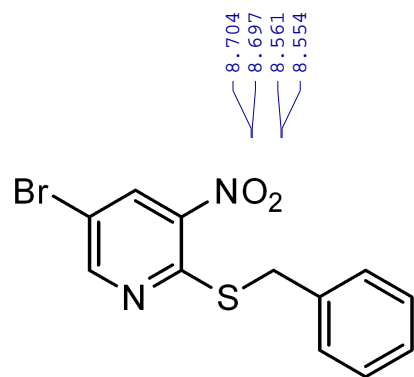

8.704  
8.697  
8.561  
8.554

7.366  
7.342  
7.281  
7.259  
7.234  
7.222  
7.201  
7.176

4.385  
4.352

3.546

1.495

1.203

0.830

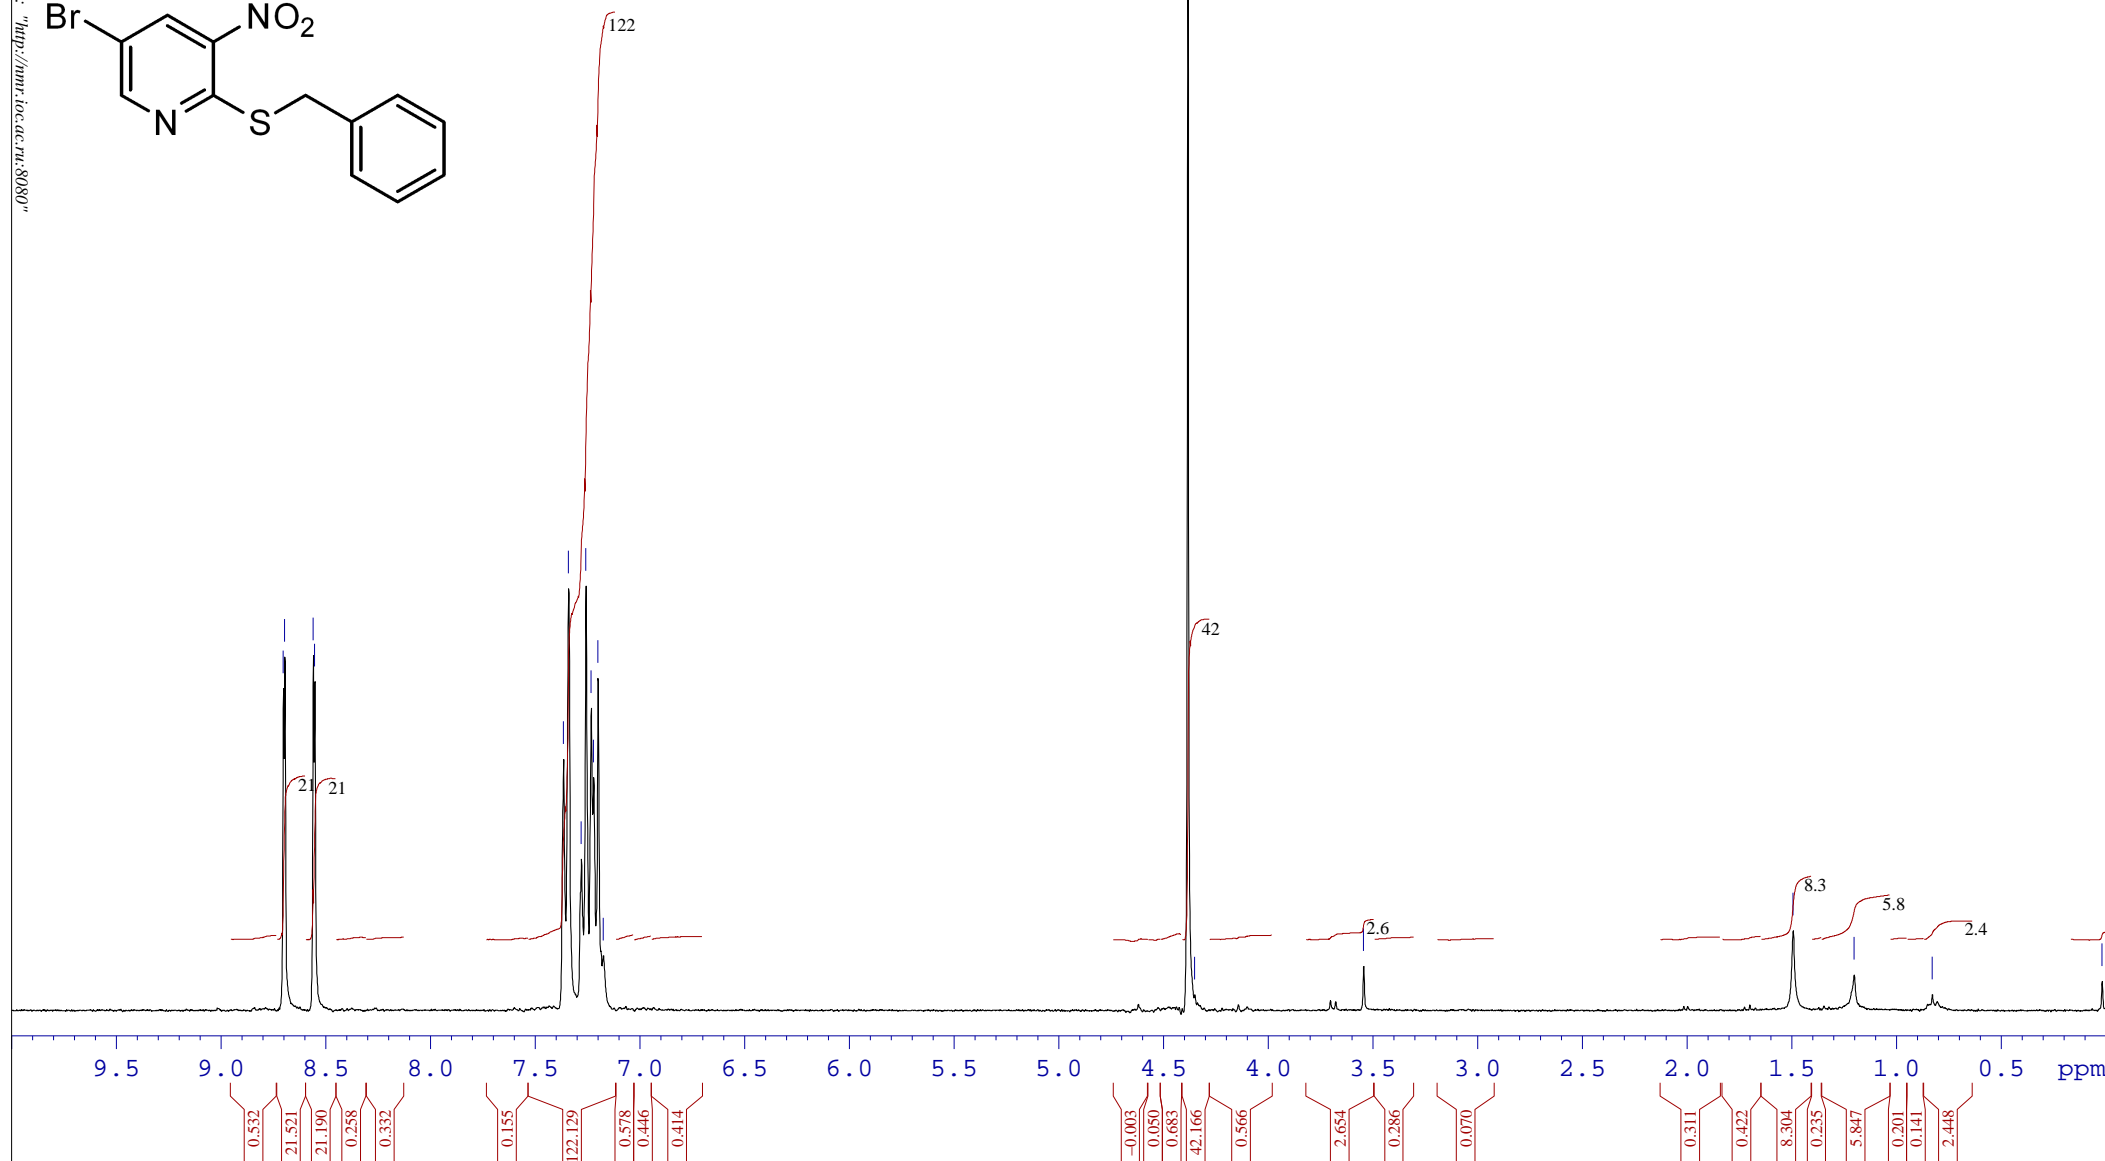



# /LPIK AF-421.13 Kokorekin-20259

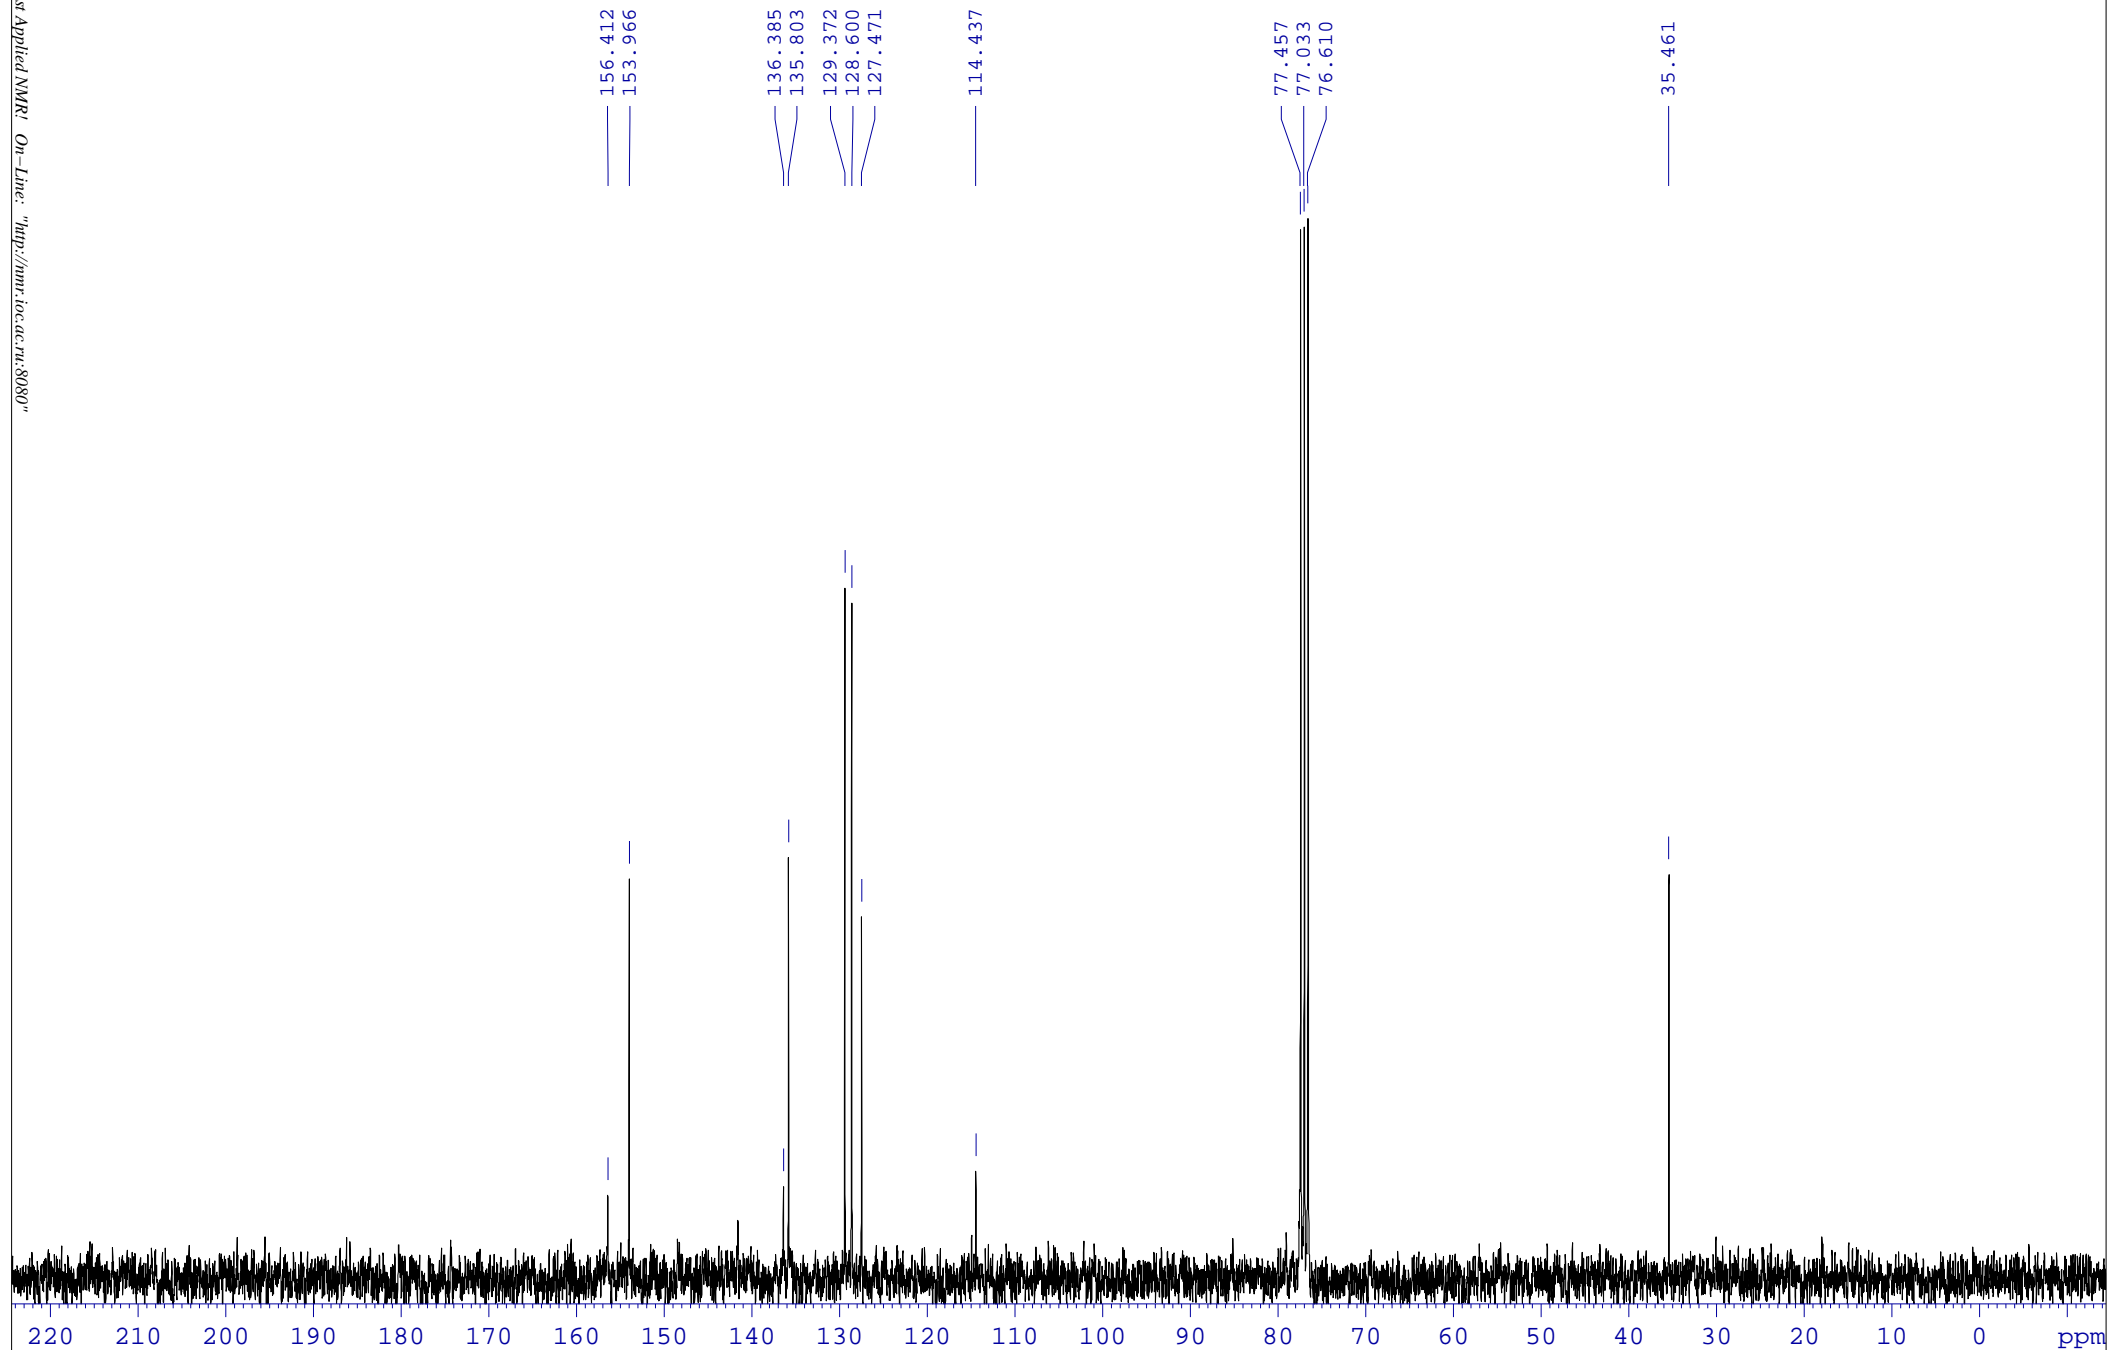

# Display Report

## Analysis Info

Analysis Name D:\Data\Kolotyrkina\2021\Bastrakov\0428023.d  
Method tune\_50-1600.m  
Sample Name /LPIK AF-421  
Comment C12H9BrN2O2S mH 324.9640 clb added CH3OH

Acquisition Date 28.04.2021 12:38:09  
Operator BDAL@DE  
Instrument / Ser# micrOTOF 10248

## Acquisition Parameter

|             |            |                      |          |                  |           |
|-------------|------------|----------------------|----------|------------------|-----------|
| Source Type | ESI        | Ion Polarity         | Positive | Set Nebulizer    | 1.0 Bar   |
| Focus       | Not active |                      |          | Set Dry Heater   | 200 °C    |
| Scan Begin  | 50 m/z     | Set Capillary        | 4500 V   | Set Dry Gas      | 4.0 l/min |
| Scan End    | 1600 m/z   | Set End Plate Offset | -500 V   | Set Divert Valve | Waste     |

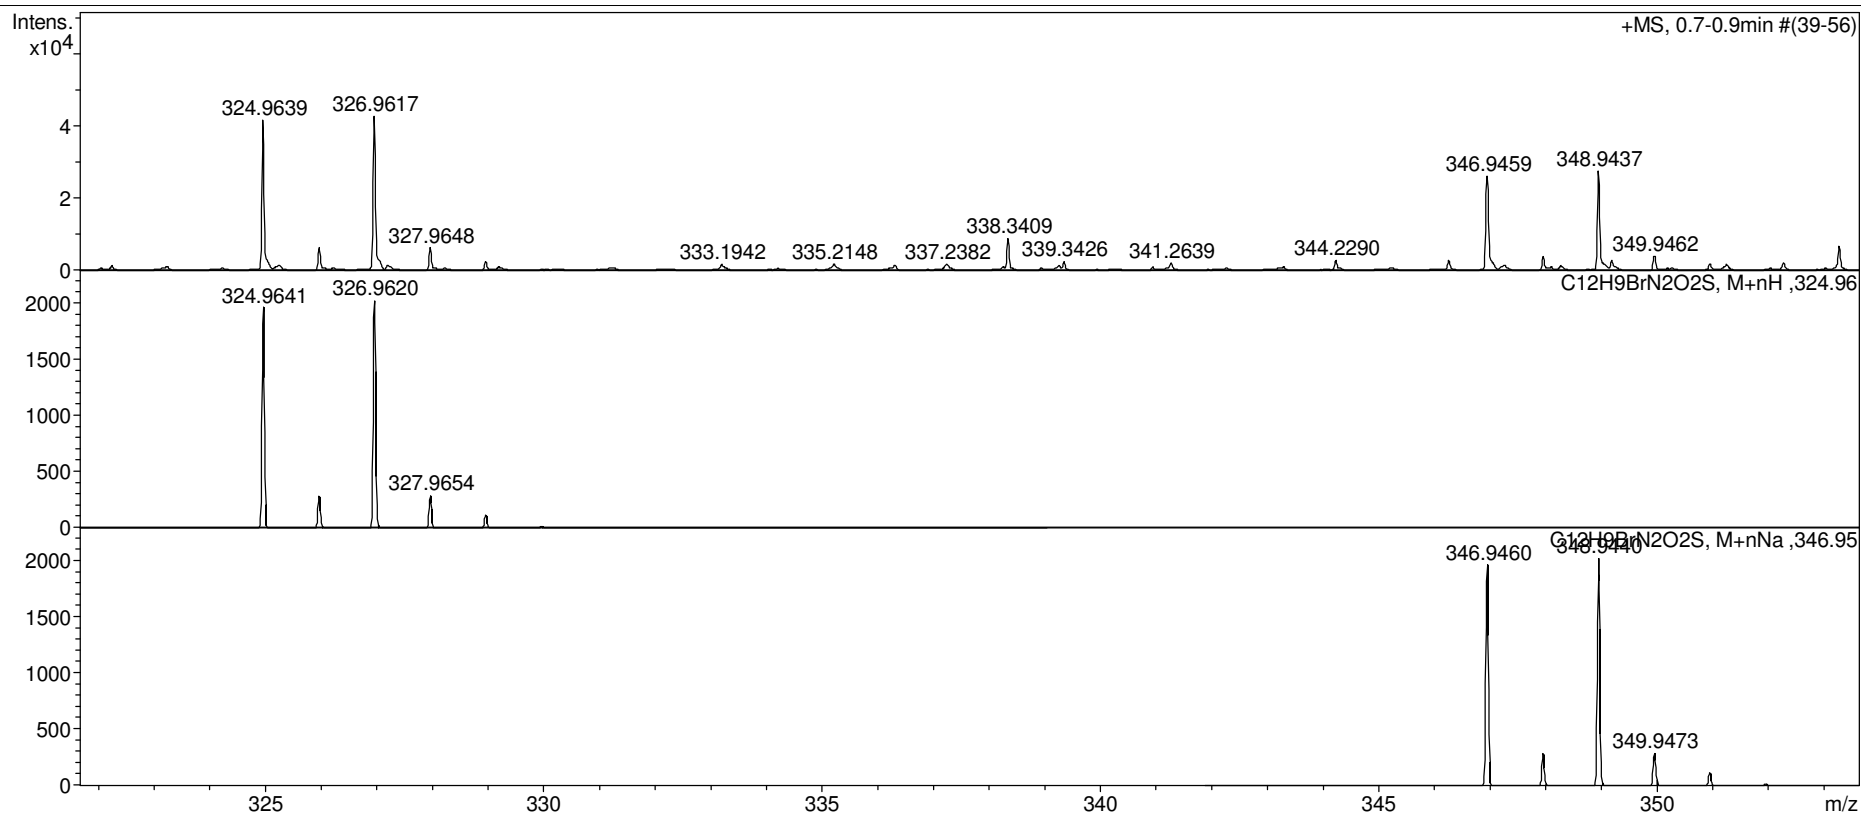



/LPIK AF\_422

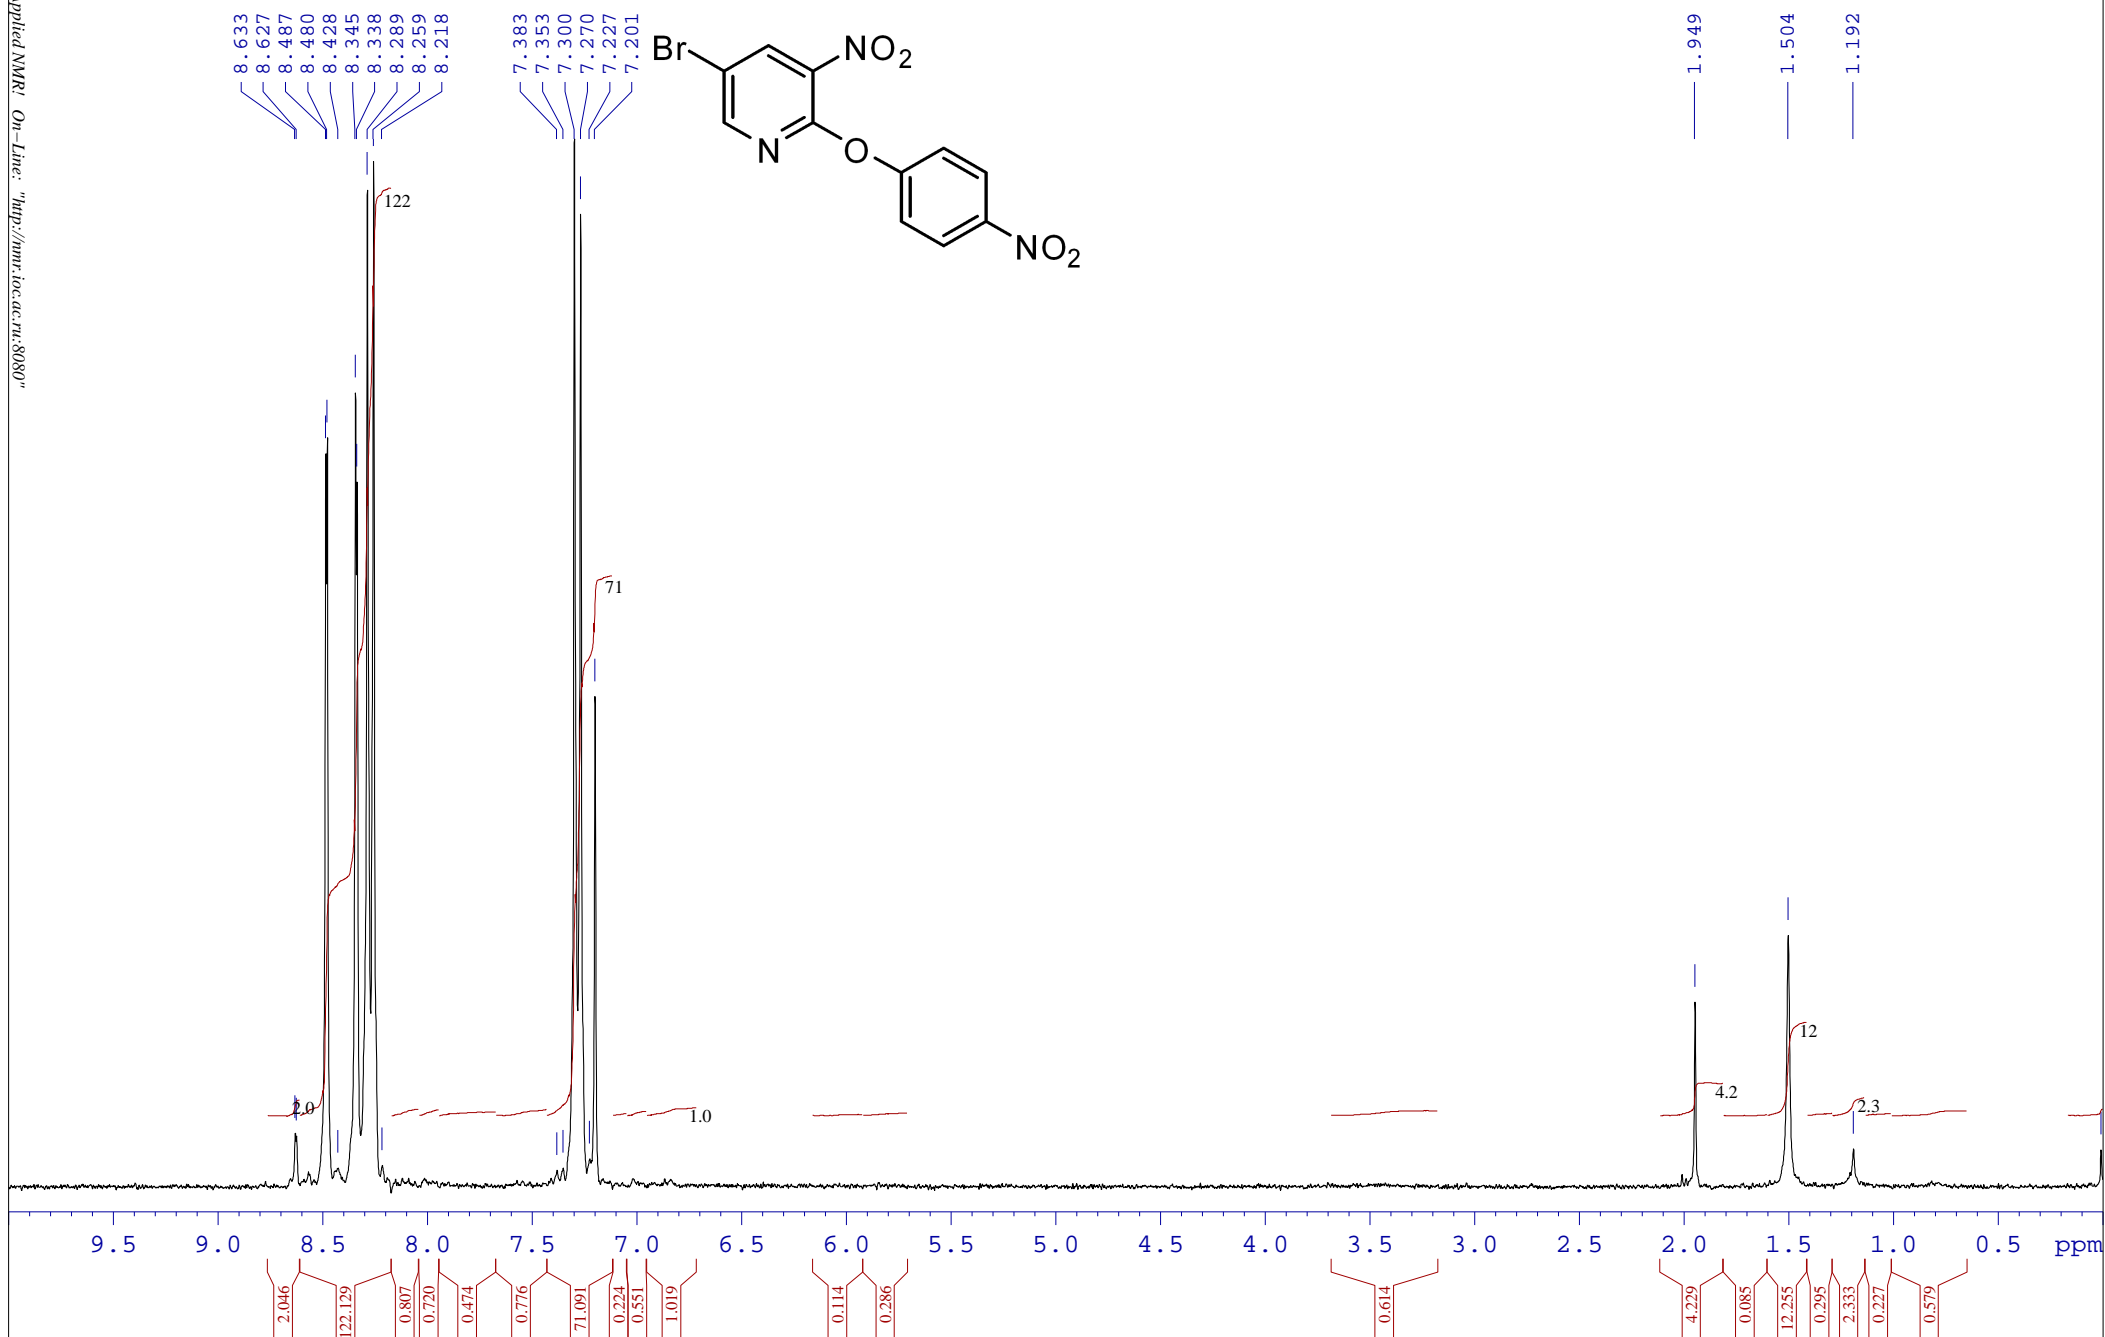



/LPIK AF-422.13 Kokorekin-20259

157.159  
153.466  
152.446  
145.389  
138.071  
125.601  
122.164  
113.846  
77.451  
77.027  
76.604

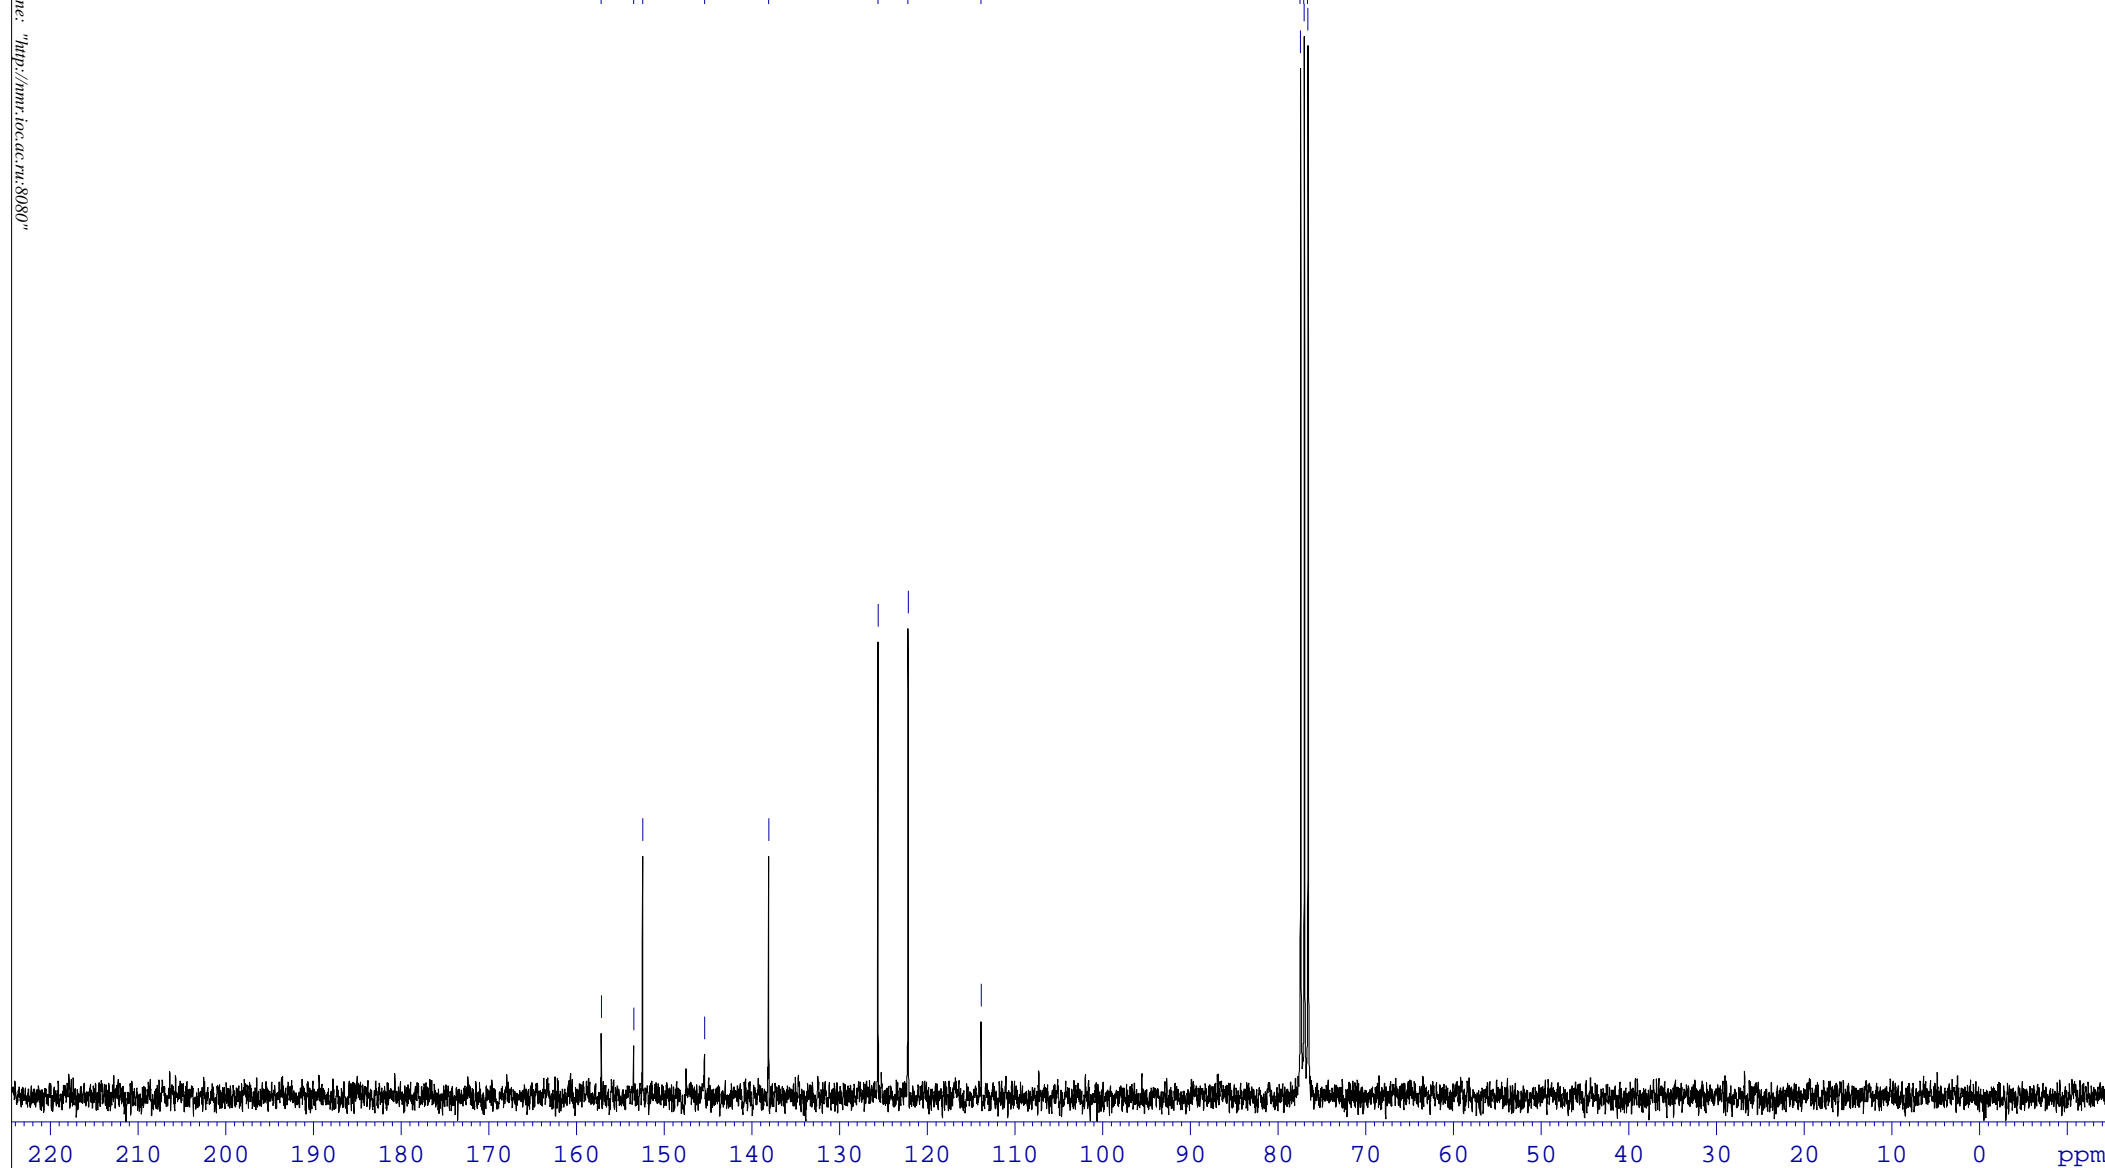



# Display Report

## Analysis Info

Analysis Name D:\Data\Kolotyrkina\2021\Bastrakov\0428024.d  
Method tune\_50-1600.m  
Sample Name /LPIK AF-422  
Comment C11H6BrN3O5 mH 339.9563 clb added CH3OH

Acquisition Date 28.04.2021 12:42:53  
Operator BDAL@DE  
Instrument / Ser# micrOTOF 10248

## Acquisition Parameter

|             |            |                      |          |                  |           |
|-------------|------------|----------------------|----------|------------------|-----------|
| Source Type | ESI        | Ion Polarity         | Positive | Set Nebulizer    | 1.0 Bar   |
| Focus       | Not active |                      |          | Set Dry Heater   | 200 °C    |
| Scan Begin  | 50 m/z     | Set Capillary        | 4500 V   | Set Dry Gas      | 4.0 l/min |
| Scan End    | 1600 m/z   | Set End Plate Offset | -500 V   | Set Divert Valve | Waste     |

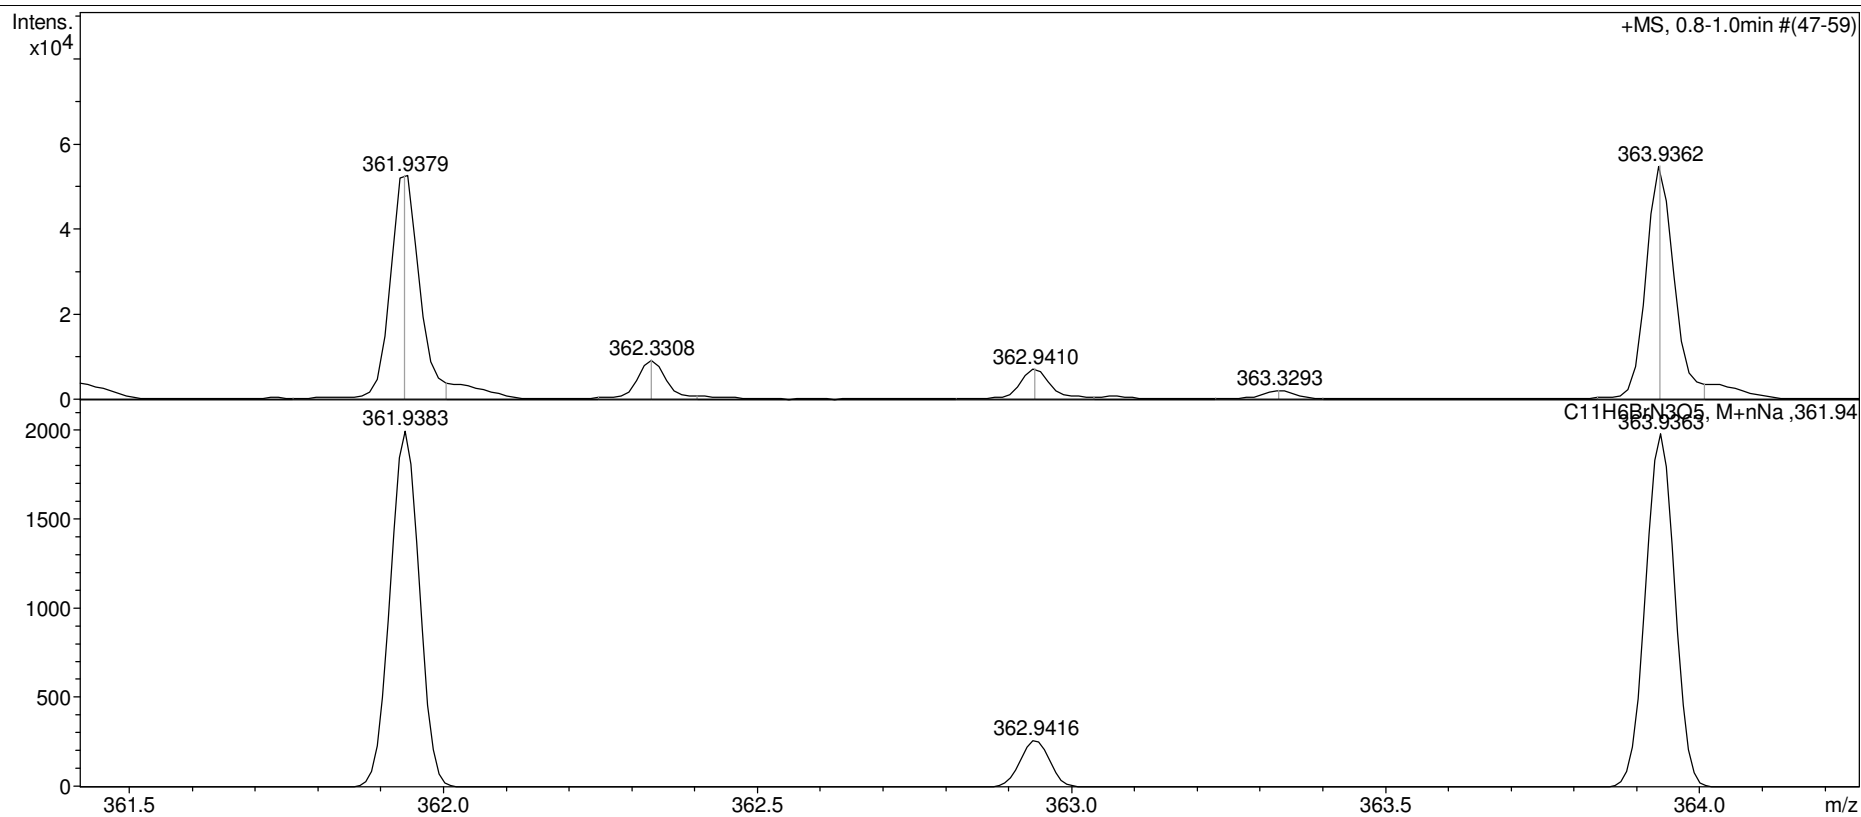

# Display Report

## Analysis Info

Analysis Name D:\Data\Kolotyrkina\2021\Bastrakov\0428024.d  
Method tune\_50-1600.m  
Sample Name /LPIK AF-422  
Comment C11H6BrN3O5 mH 339.9563 clb added CH3OH

Acquisition Date 28.04.2021 12:42:53

Operator BDAL@DE  
Instrument / Ser# micrOTOF 10248

## Acquisition Parameter

|             |            |                      |          |                  |           |
|-------------|------------|----------------------|----------|------------------|-----------|
| Source Type | ESI        | Ion Polarity         | Positive | Set Nebulizer    | 1.0 Bar   |
| Focus       | Not active |                      |          | Set Dry Heater   | 200 °C    |
| Scan Begin  | 50 m/z     | Set Capillary        | 4500 V   | Set Dry Gas      | 4.0 l/min |
| Scan End    | 1600 m/z   | Set End Plate Offset | -500 V   | Set Divert Valve | Waste     |

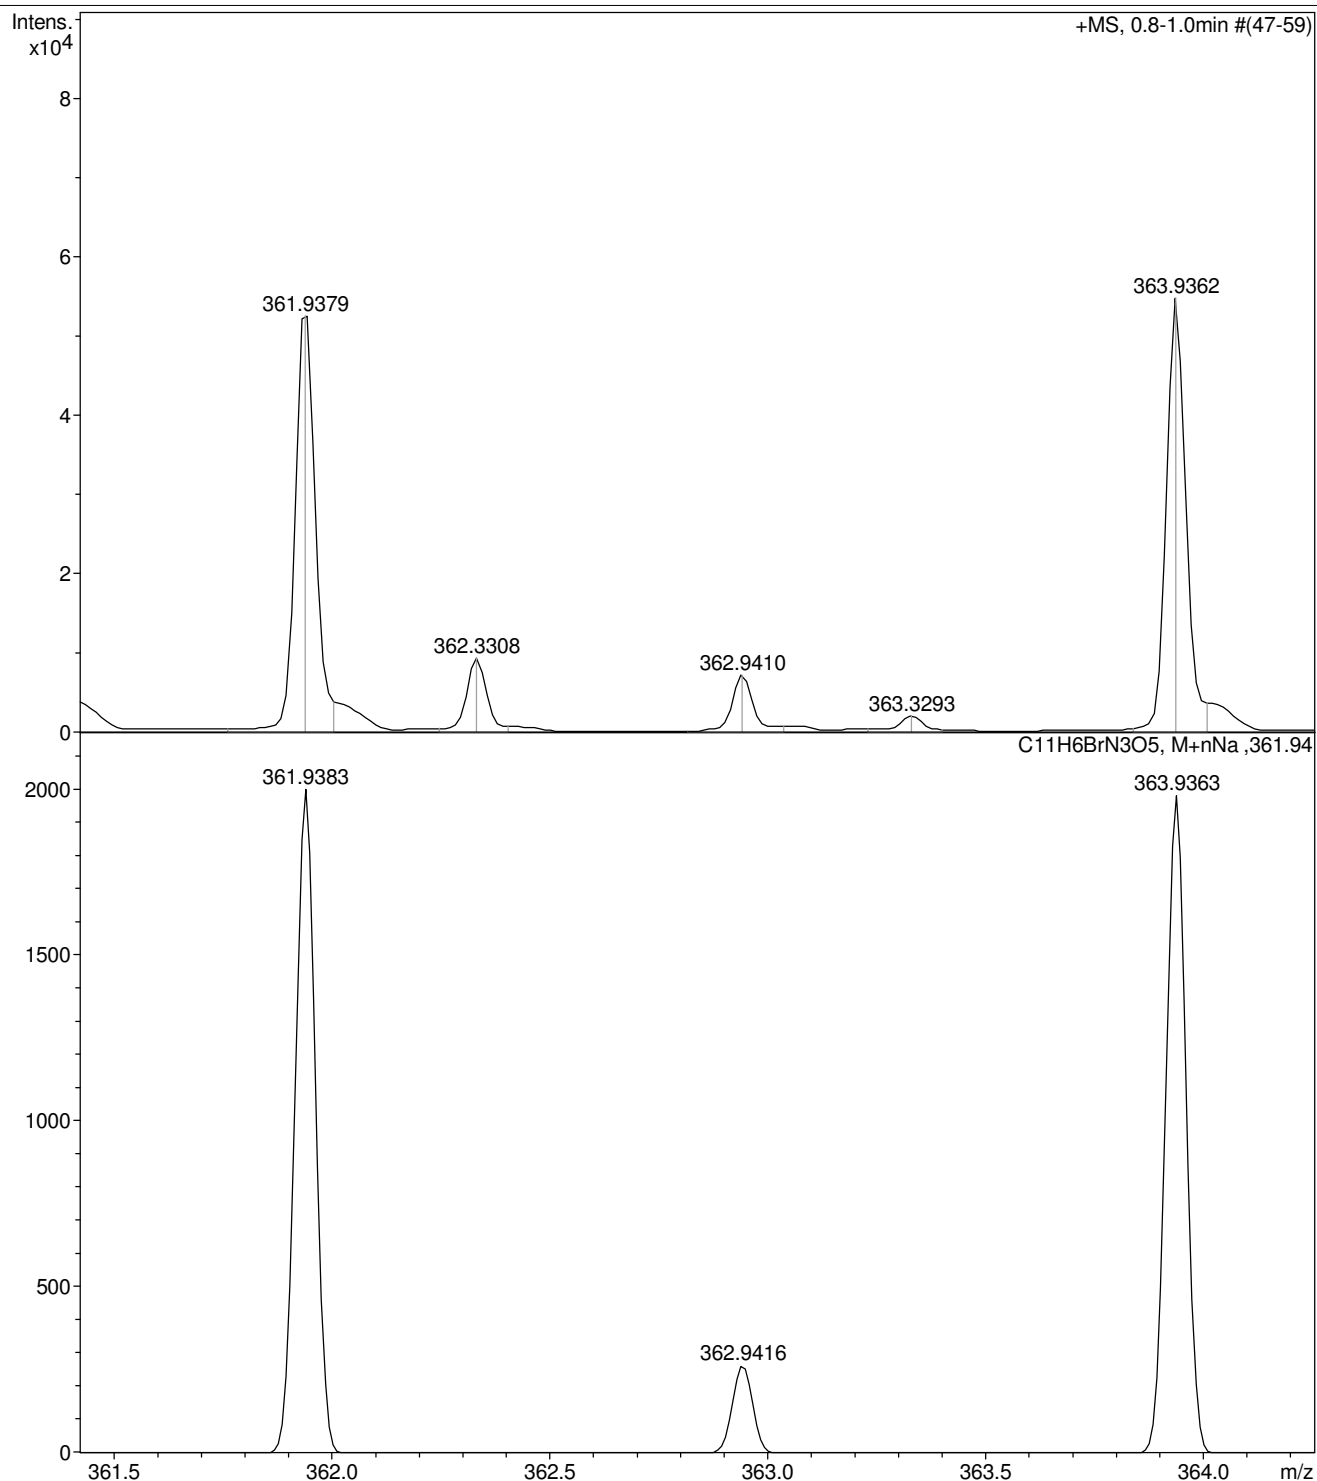



/LPIK AF\_423

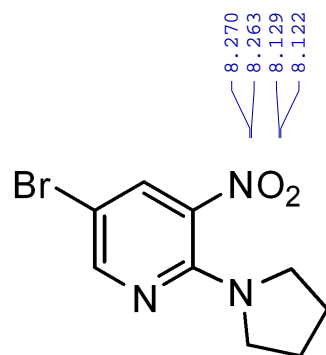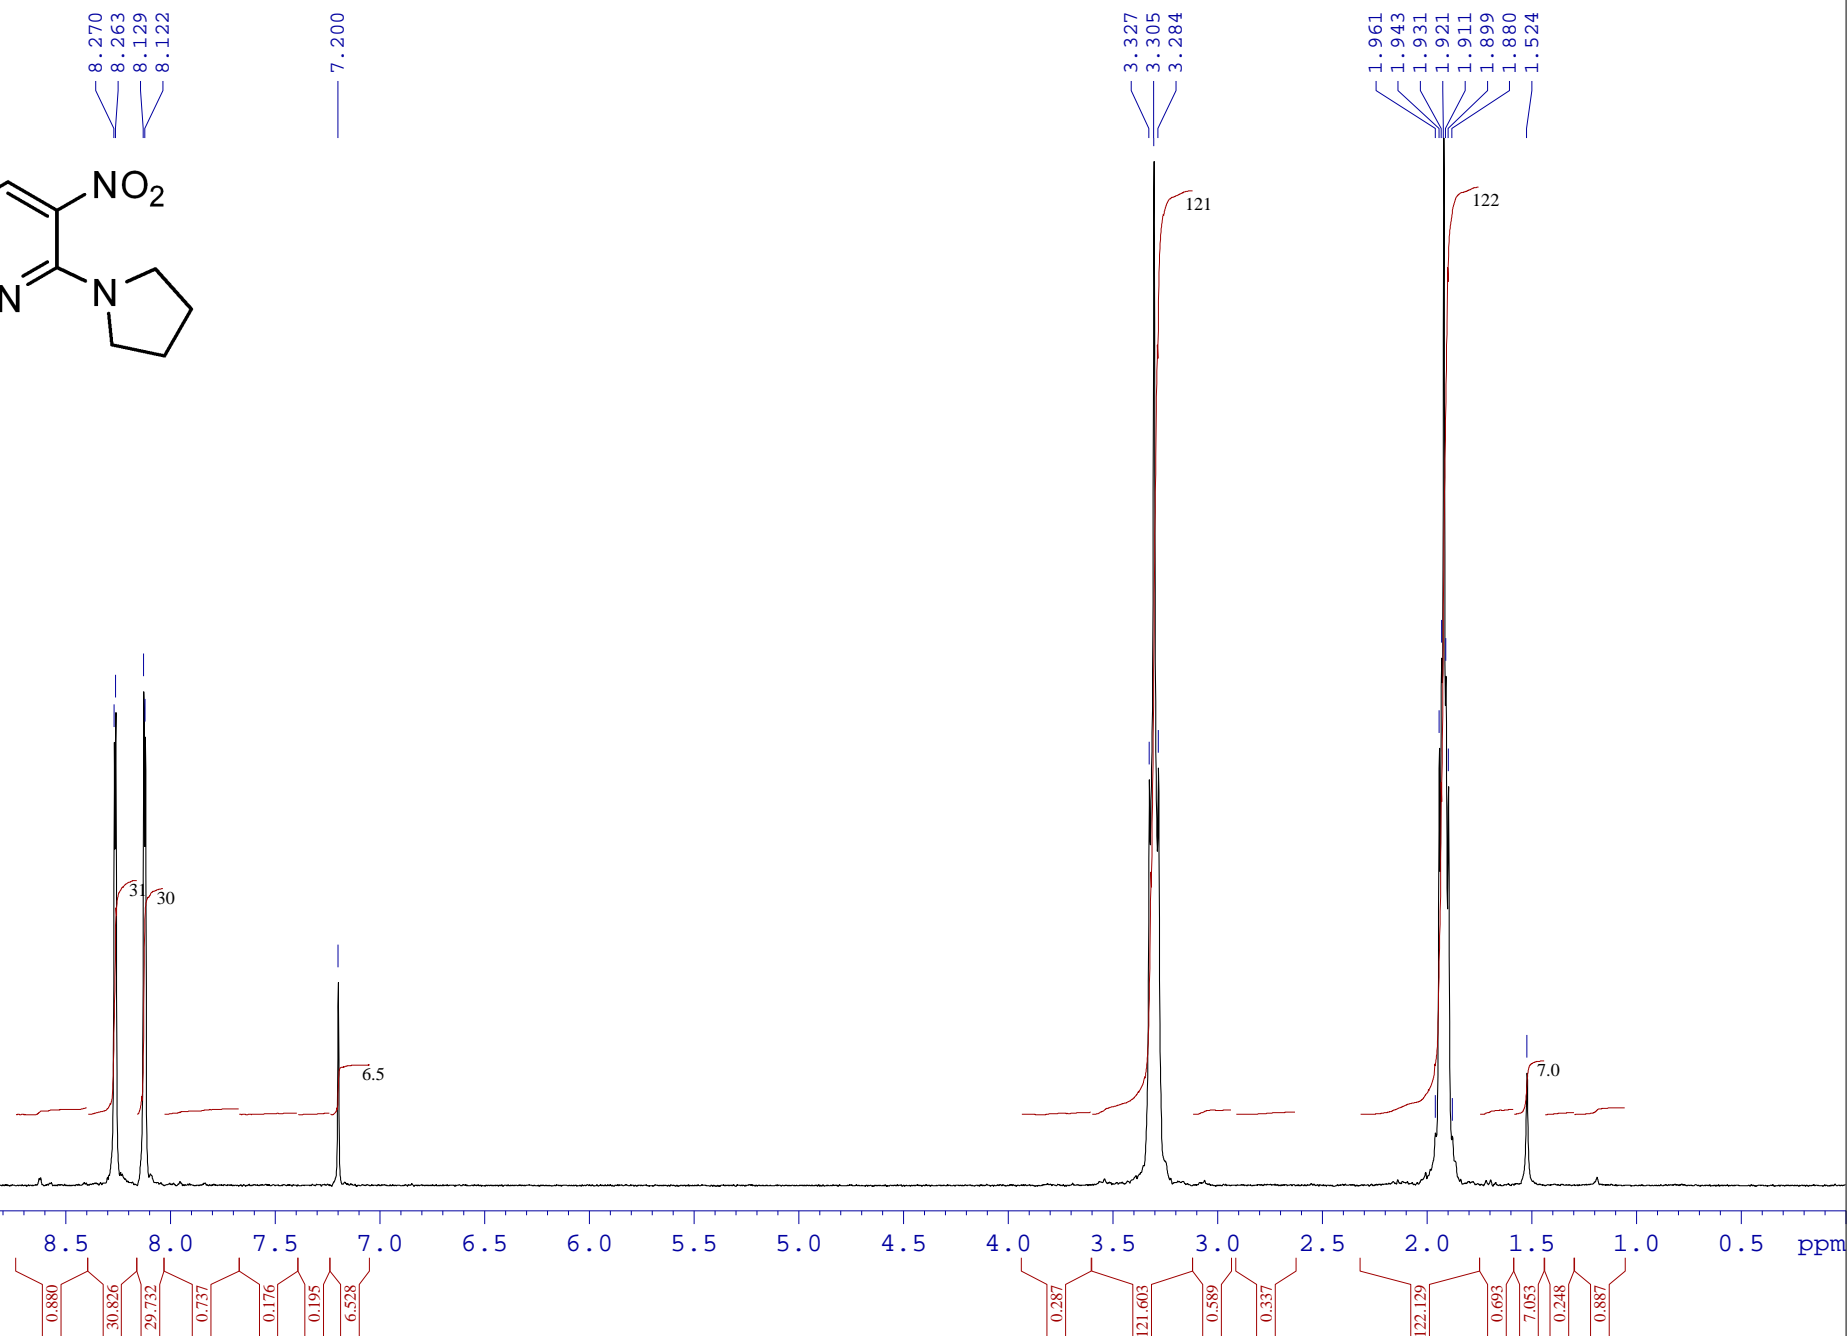



/LPIK AF-423.13 Kokorekin-20259

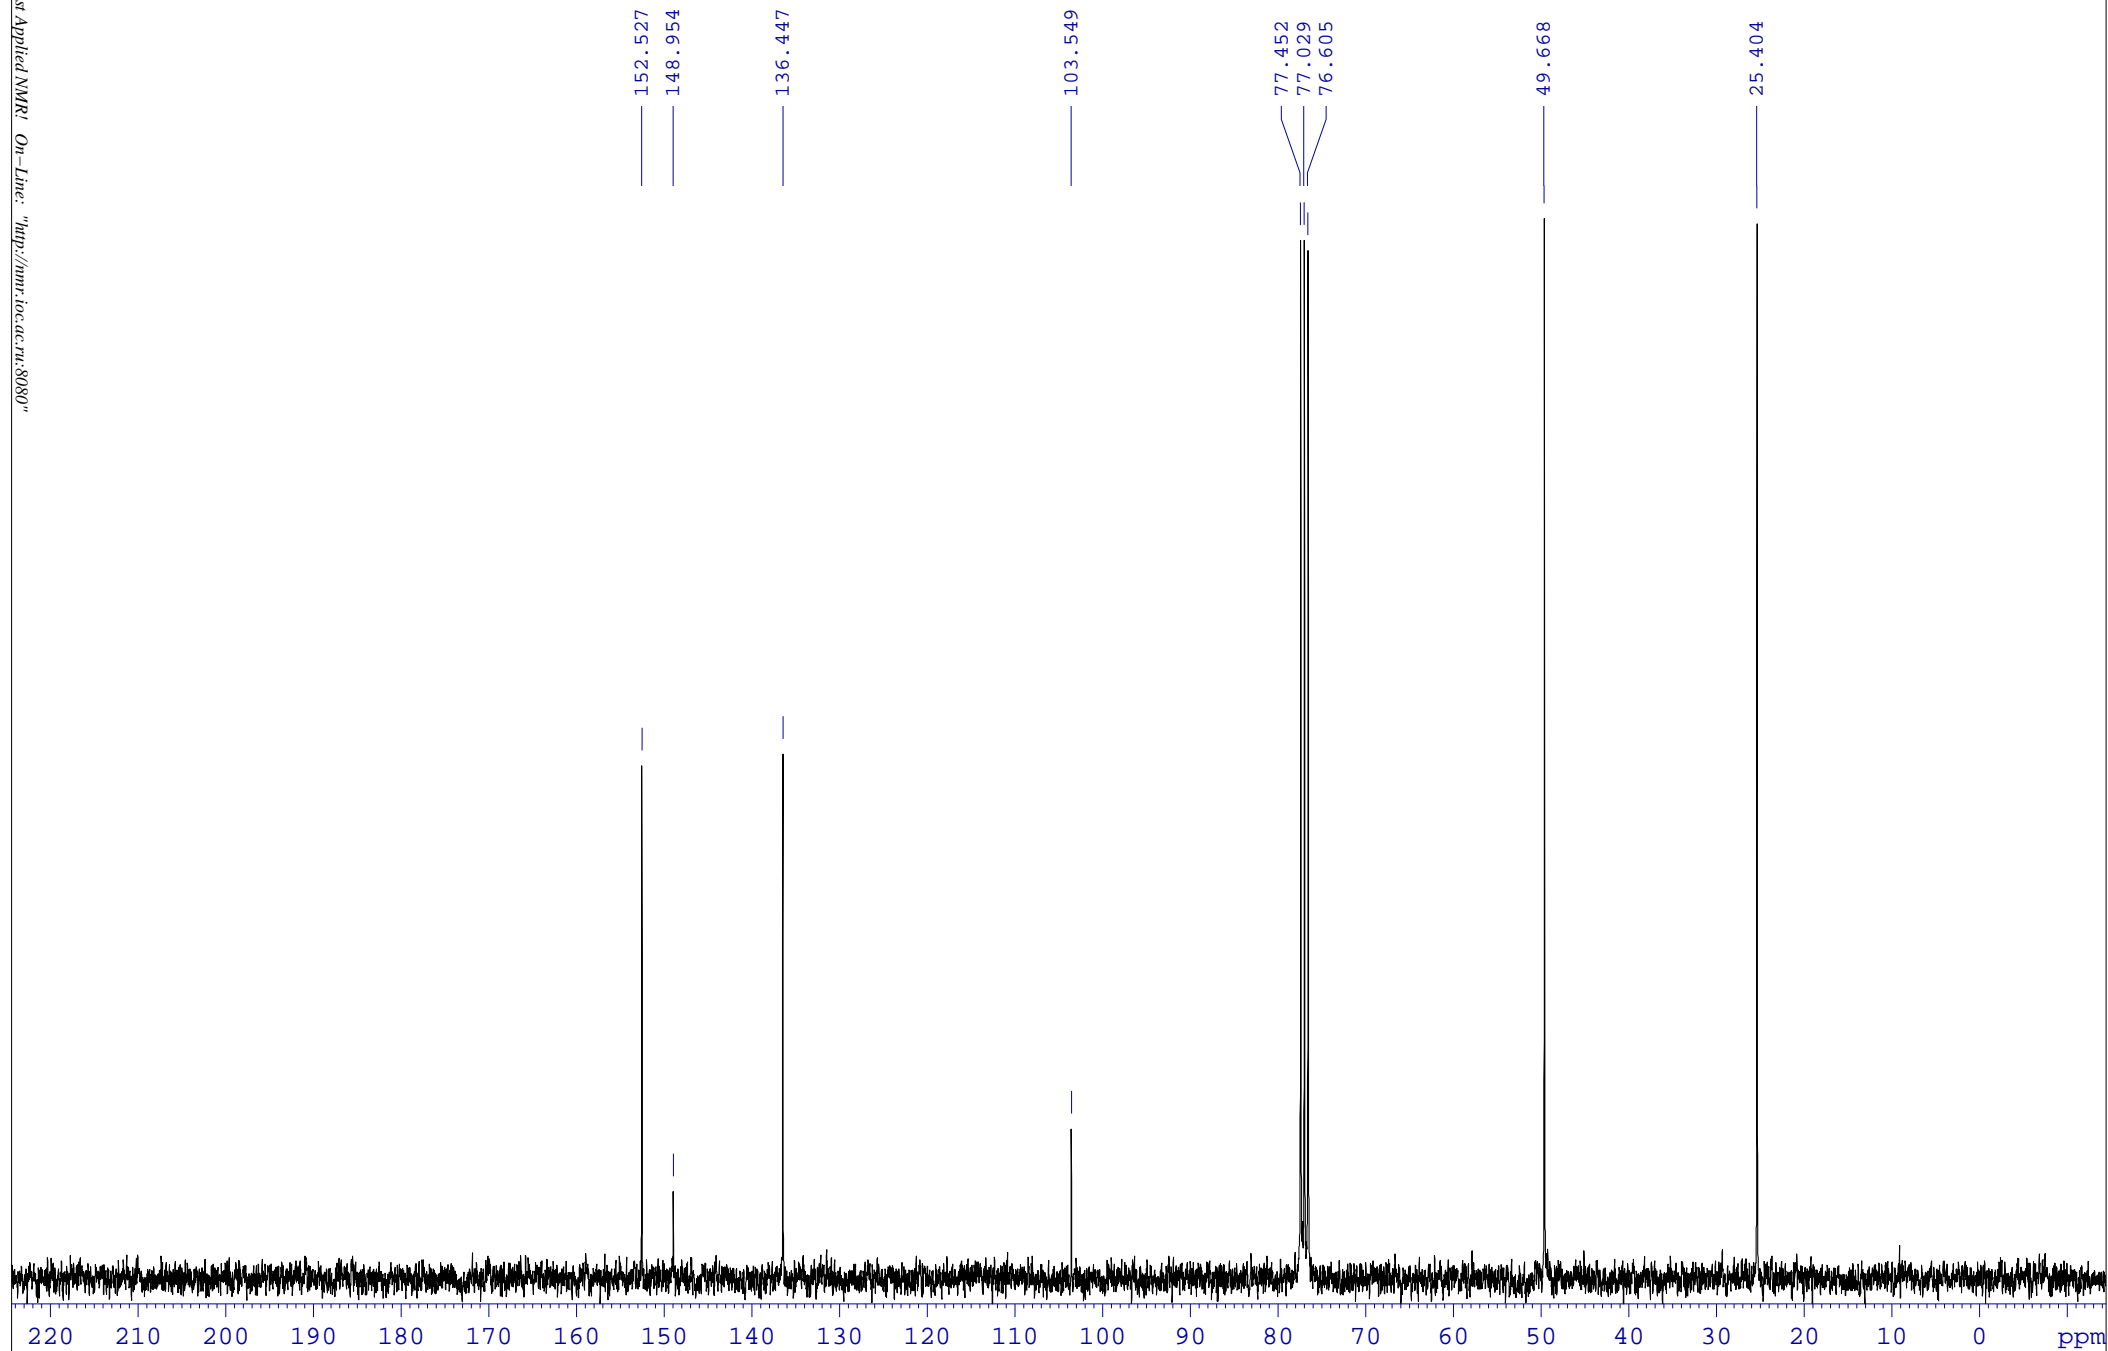

# Display Report

## Analysis Info

Analysis Name D:\Data\Kolotyrkina\2021\Bastrakov\0428025.d  
Method tune\_50-1600.m  
Sample Name /LPIK AF-423  
Comment C9H10BrN3O2 mH 272.0029clb added CH3OH

Acquisition Date 28.04.2021 12:51:19  
Operator BDAL@DE  
Instrument / Ser# micrOTOF 10248

## Acquisition Parameter

|             |            |                      |          |                  |           |
|-------------|------------|----------------------|----------|------------------|-----------|
| Source Type | ESI        | Ion Polarity         | Positive | Set Nebulizer    | 1.0 Bar   |
| Focus       | Not active |                      |          | Set Dry Heater   | 200 °C    |
| Scan Begin  | 50 m/z     | Set Capillary        | 4500 V   | Set Dry Gas      | 4.0 l/min |
| Scan End    | 1600 m/z   | Set End Plate Offset | -500 V   | Set Divert Valve | Waste     |

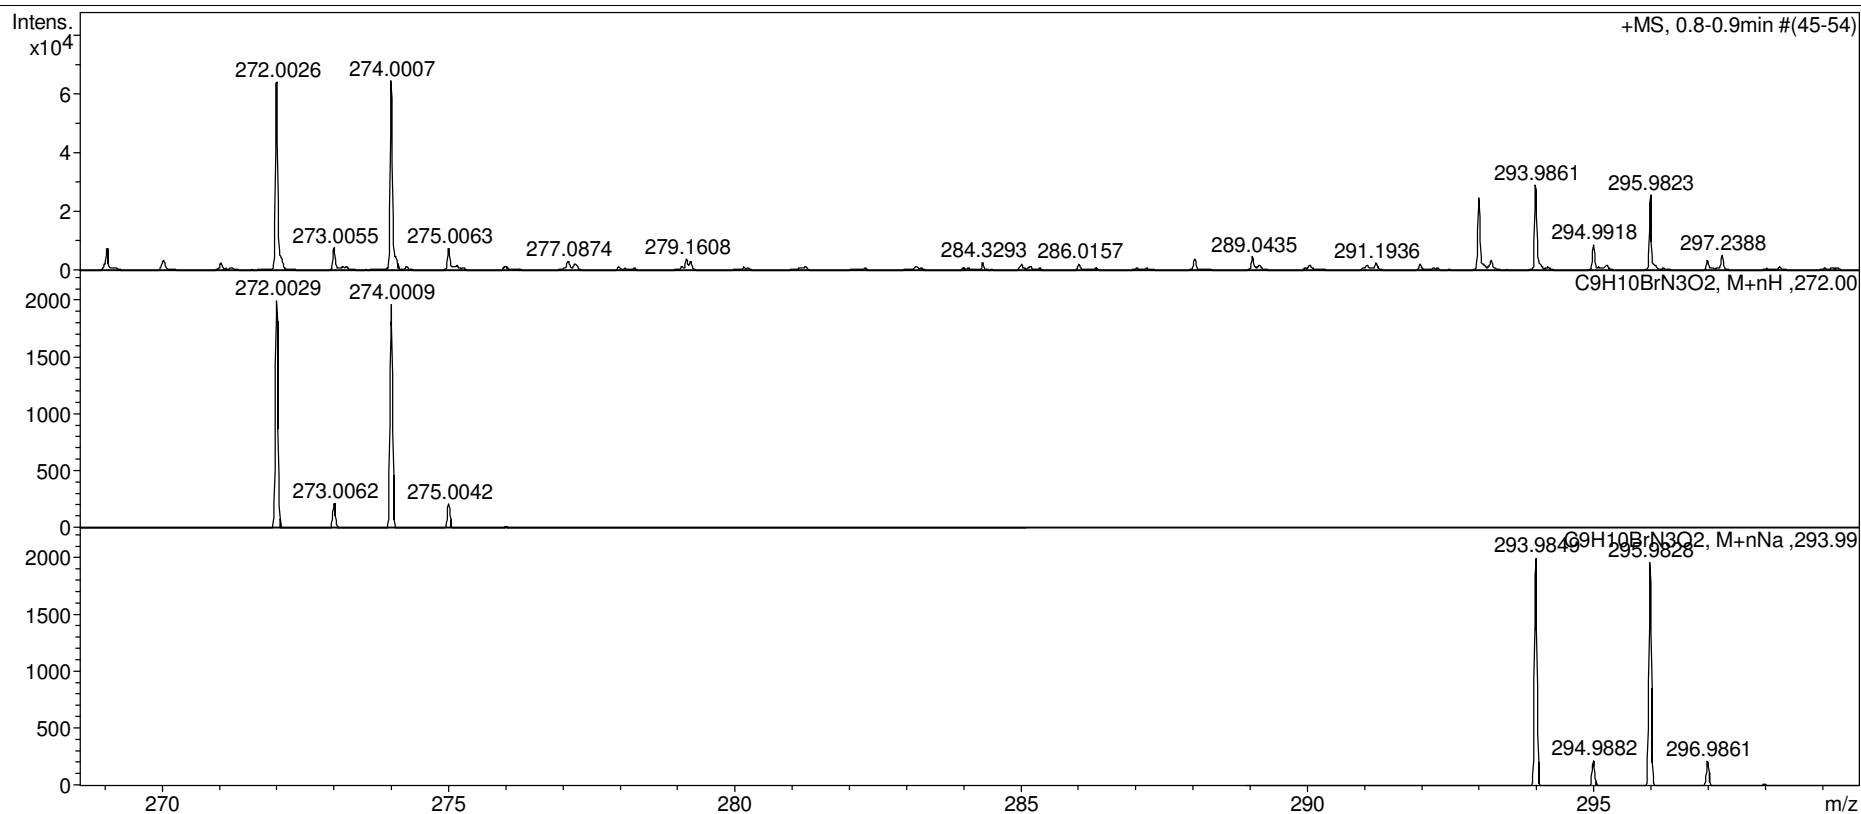



/LPIK AF426

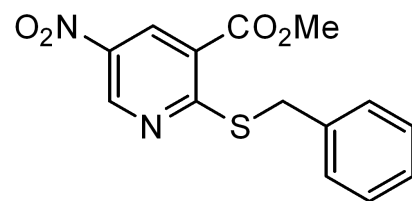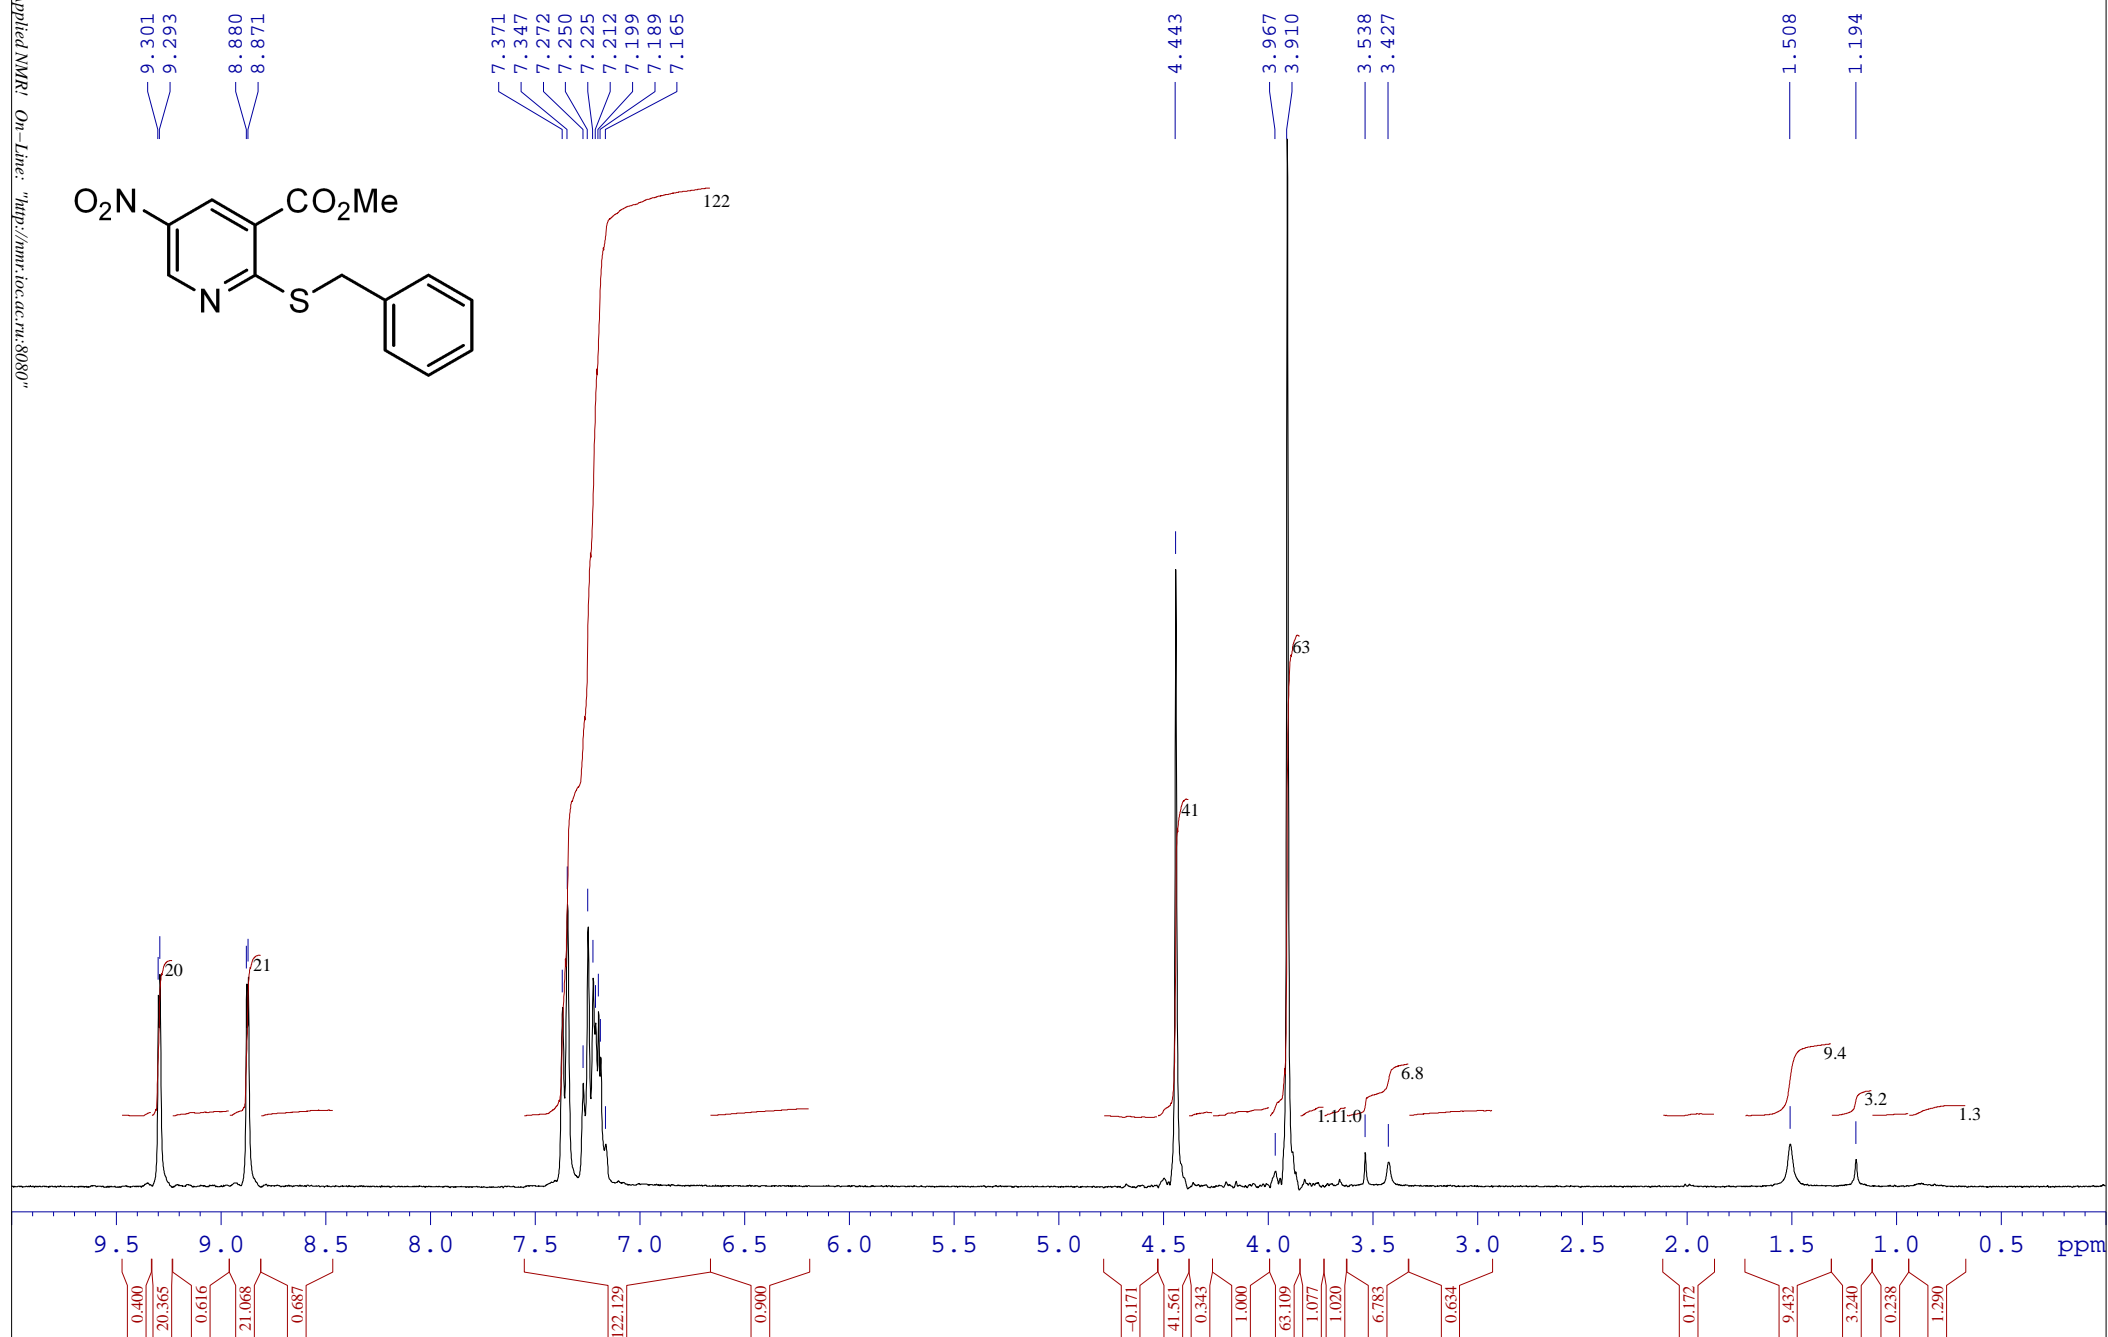



/LPIK AF-426.13 Kokorekin-20259

169.606  
163.912  
146.504  
140.204  
136.477  
133.463  
129.386  
128.575  
127.440  
122.141  
77.465  
77.041  
76.617  
52.972  
35.770

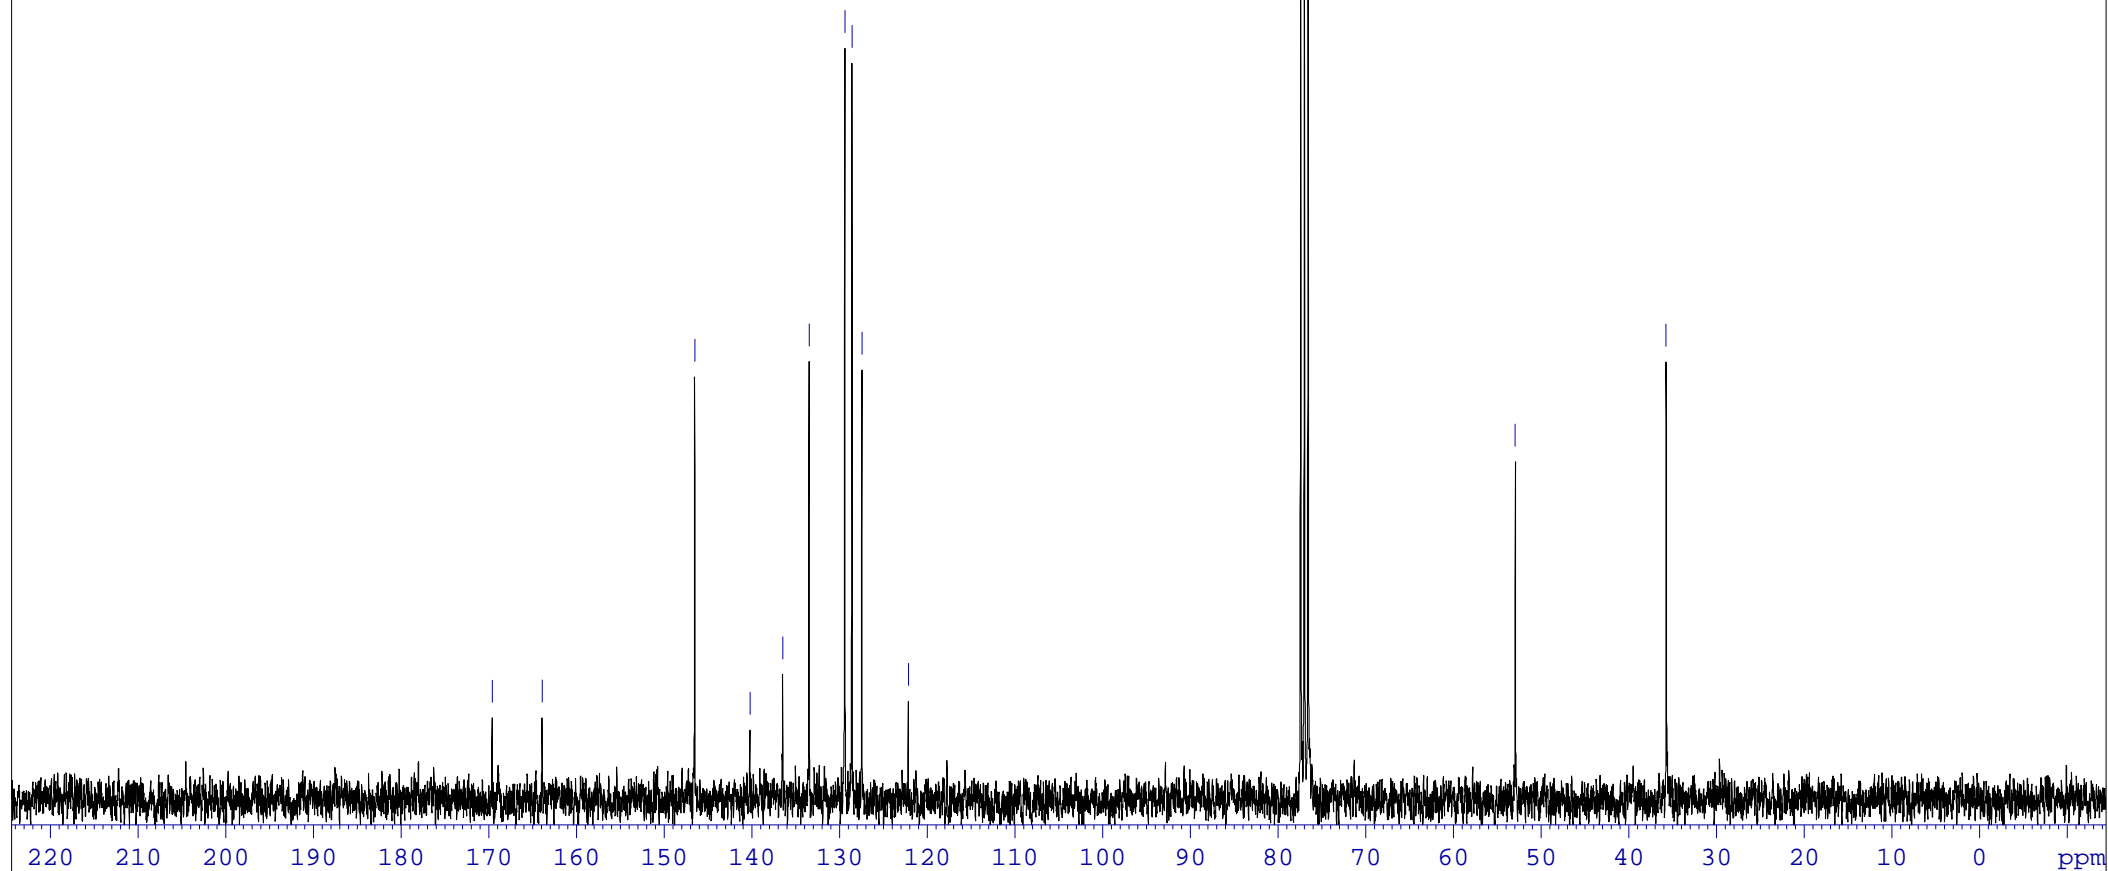

# Display Report

## Analysis Info

Analysis Name D:\Data\Kolotyrkina\2021\Bastrakov\0428026.d  
Method tune\_50-1600.m  
Sample Name /LPIK AF-426  
Comment C14H12N2O4S mH 305.0590 clb added CH3OH

Acquisition Date 28.04.2021 12:56:11  
Operator BDAL@DE  
Instrument / Ser# micrOTOF 10248

## Acquisition Parameter

|             |            |                      |          |                  |           |
|-------------|------------|----------------------|----------|------------------|-----------|
| Source Type | ESI        | Ion Polarity         | Positive | Set Nebulizer    | 1.0 Bar   |
| Focus       | Not active |                      |          | Set Dry Heater   | 200 °C    |
| Scan Begin  | 50 m/z     | Set Capillary        | 4500 V   | Set Dry Gas      | 4.0 l/min |
| Scan End    | 1600 m/z   | Set End Plate Offset | -500 V   | Set Divert Valve | Waste     |

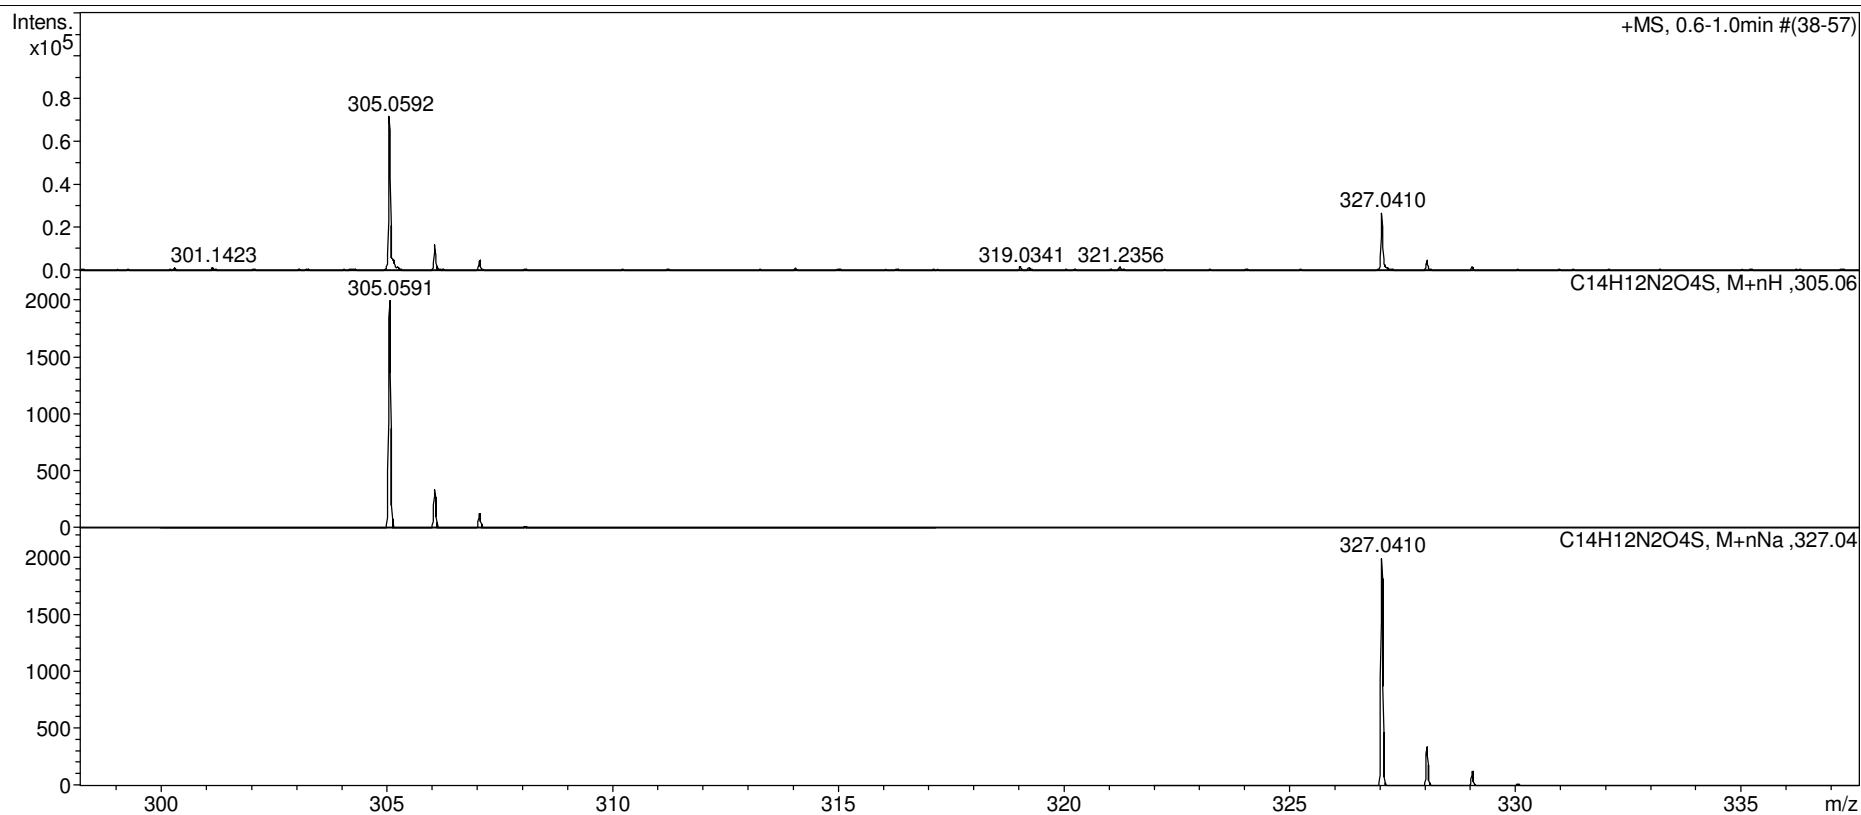





/LPIK AF427

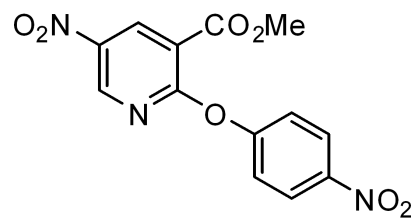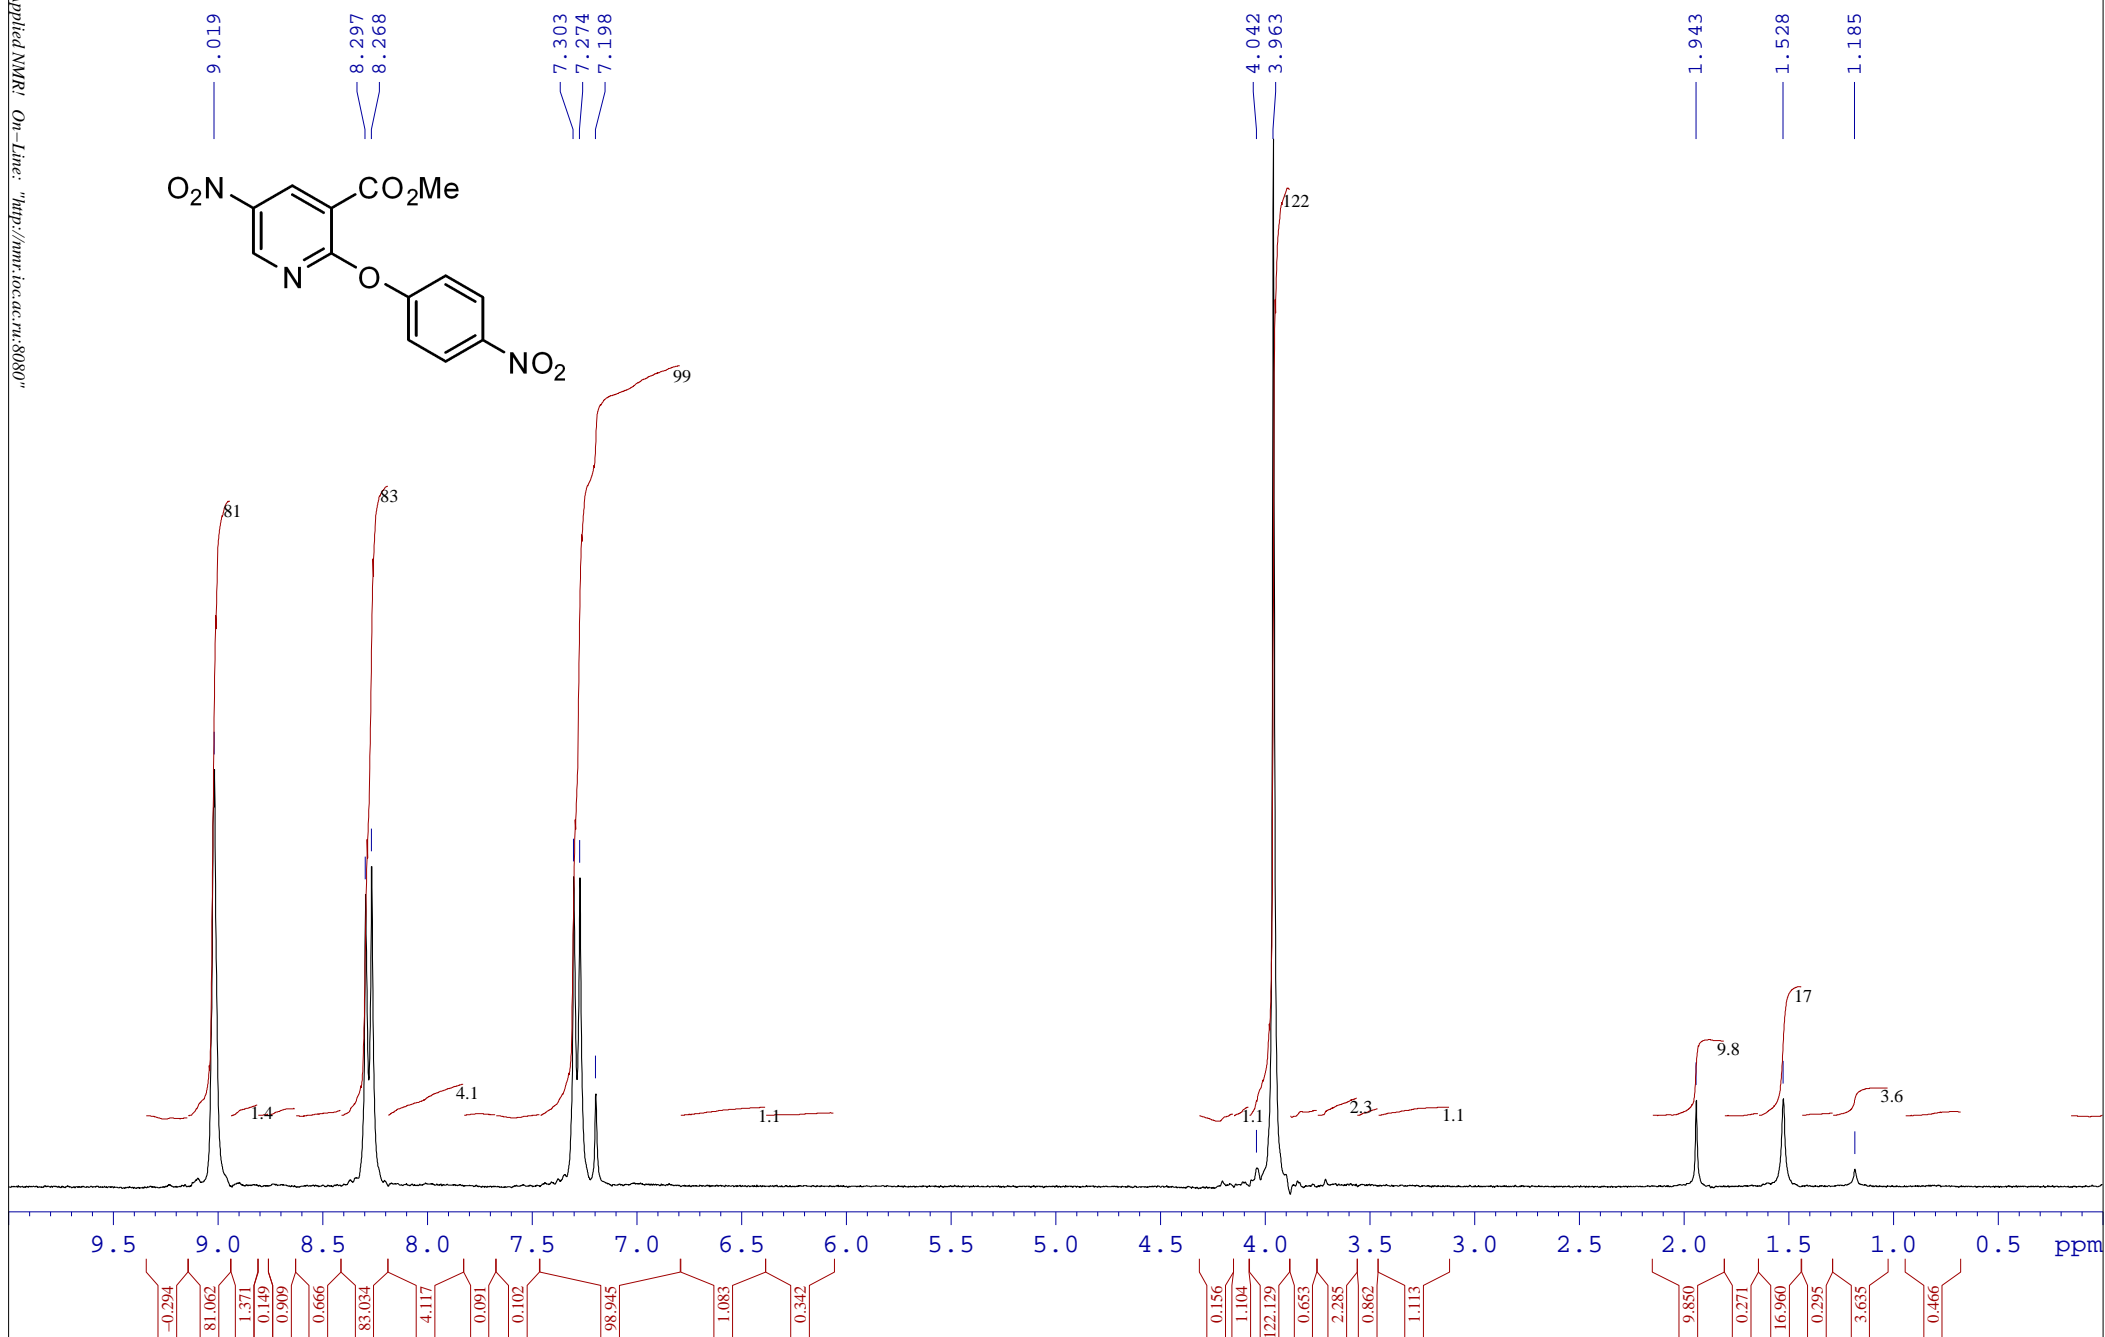



# /LPIK AF-427.13 Kokorekin-20259

163.325  
162.573  
157.338  
146.968  
145.506  
140.466  
137.587  
125.568  
122.598  
115.275  
77.465  
77.042  
76.618  
53.303

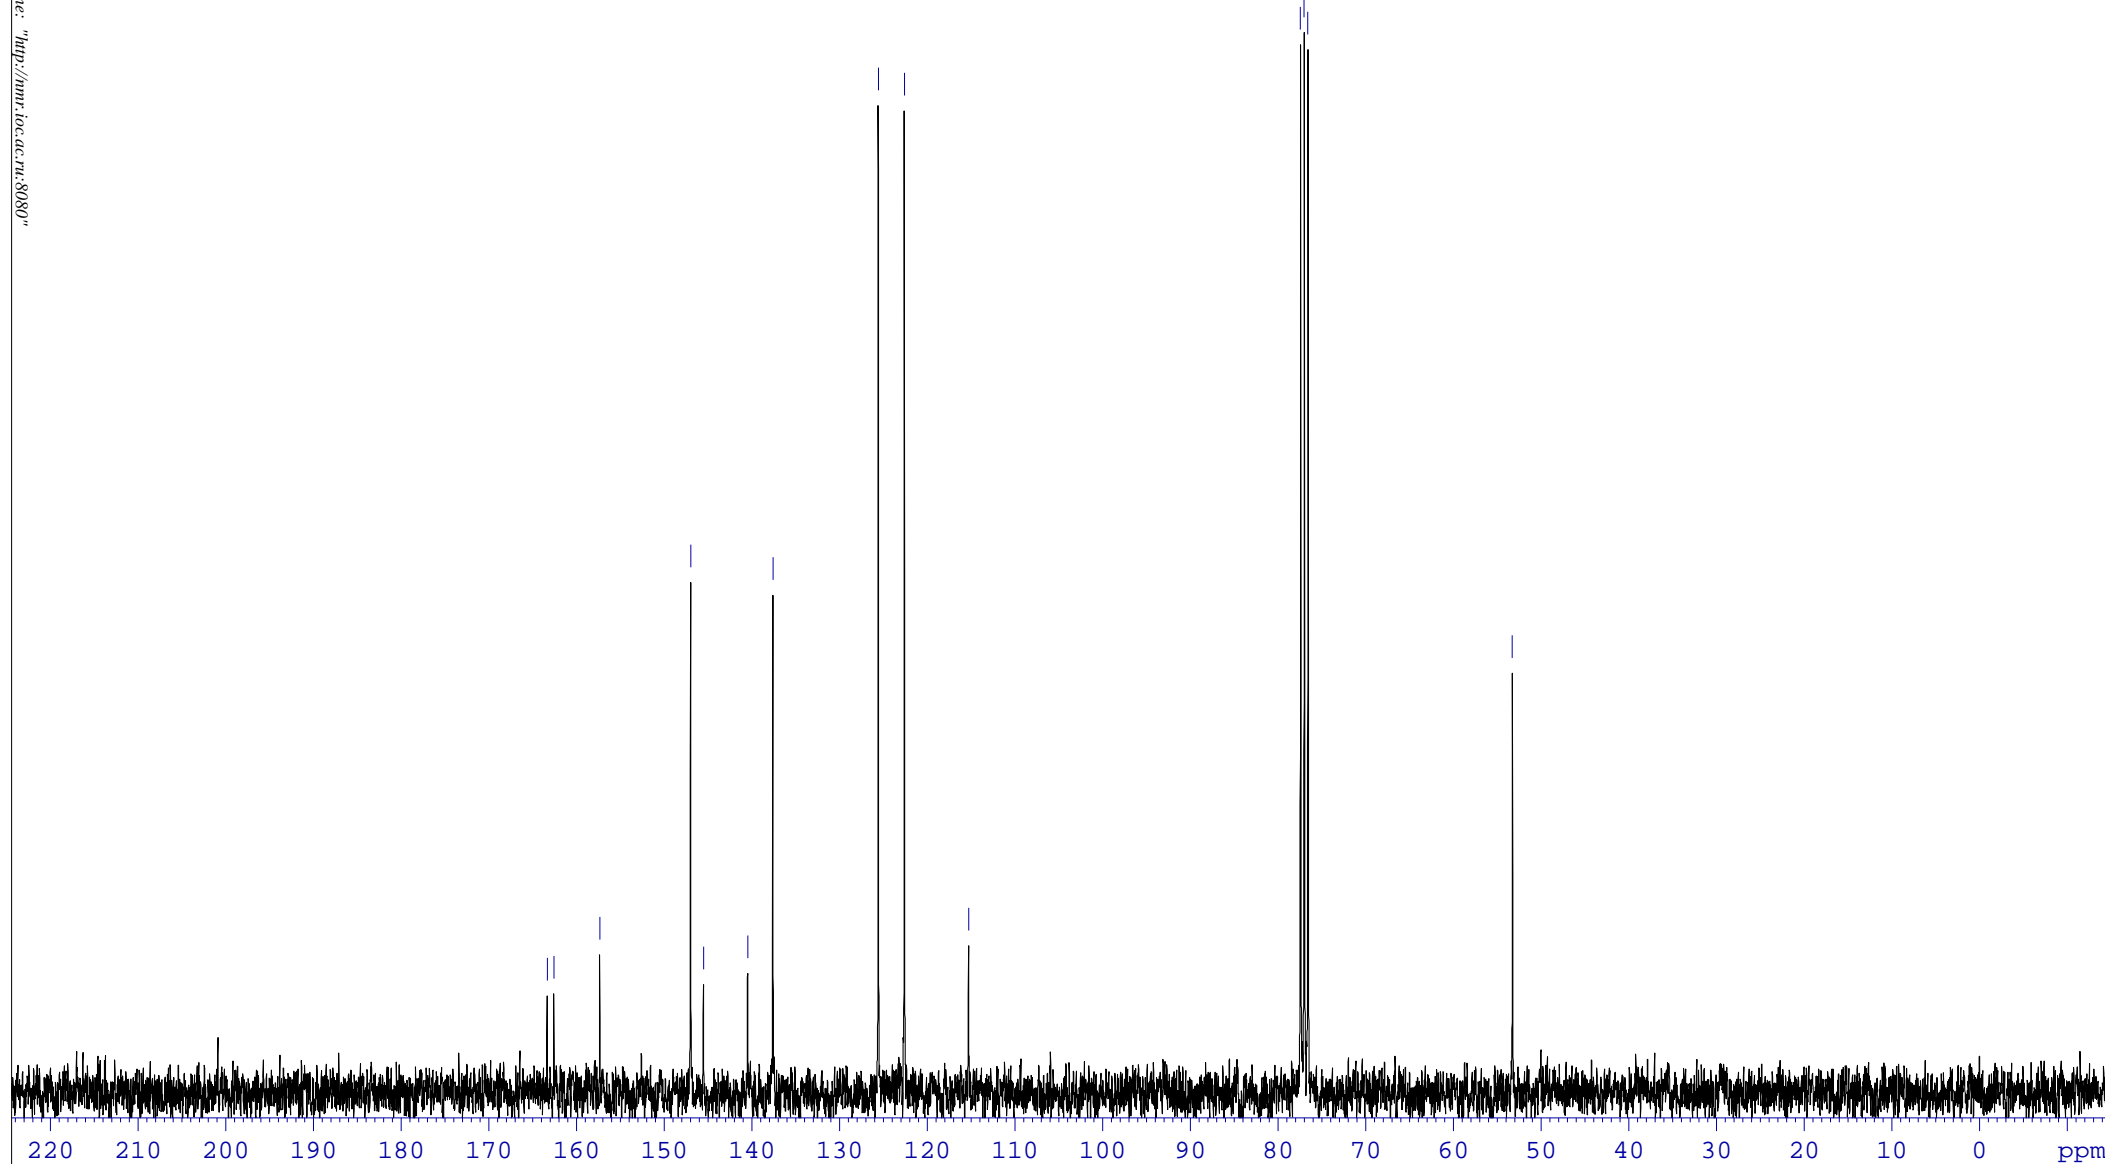

# Display Report

## Analysis Info

Analysis Name D:\Data\Kolotyrkina\2021\Bastrakov\0428027.d  
Method tune\_50-1600.m  
Sample Name /LPIK AF-427  
Comment C13H9N3O7 mH 320.0513 clb added CH3OH

Acquisition Date 28.04.2021 13:01:04

Operator BDAL@DE  
Instrument / Ser# micrOTOF 10248

## Acquisition Parameter

|             |            |                      |          |                  |           |
|-------------|------------|----------------------|----------|------------------|-----------|
| Source Type | ESI        | Ion Polarity         | Positive | Set Nebulizer    | 1.0 Bar   |
| Focus       | Not active |                      |          | Set Dry Heater   | 200 °C    |
| Scan Begin  | 50 m/z     | Set Capillary        | 4500 V   | Set Dry Gas      | 4.0 l/min |
| Scan End    | 1600 m/z   | Set End Plate Offset | -500 V   | Set Divert Valve | Waste     |

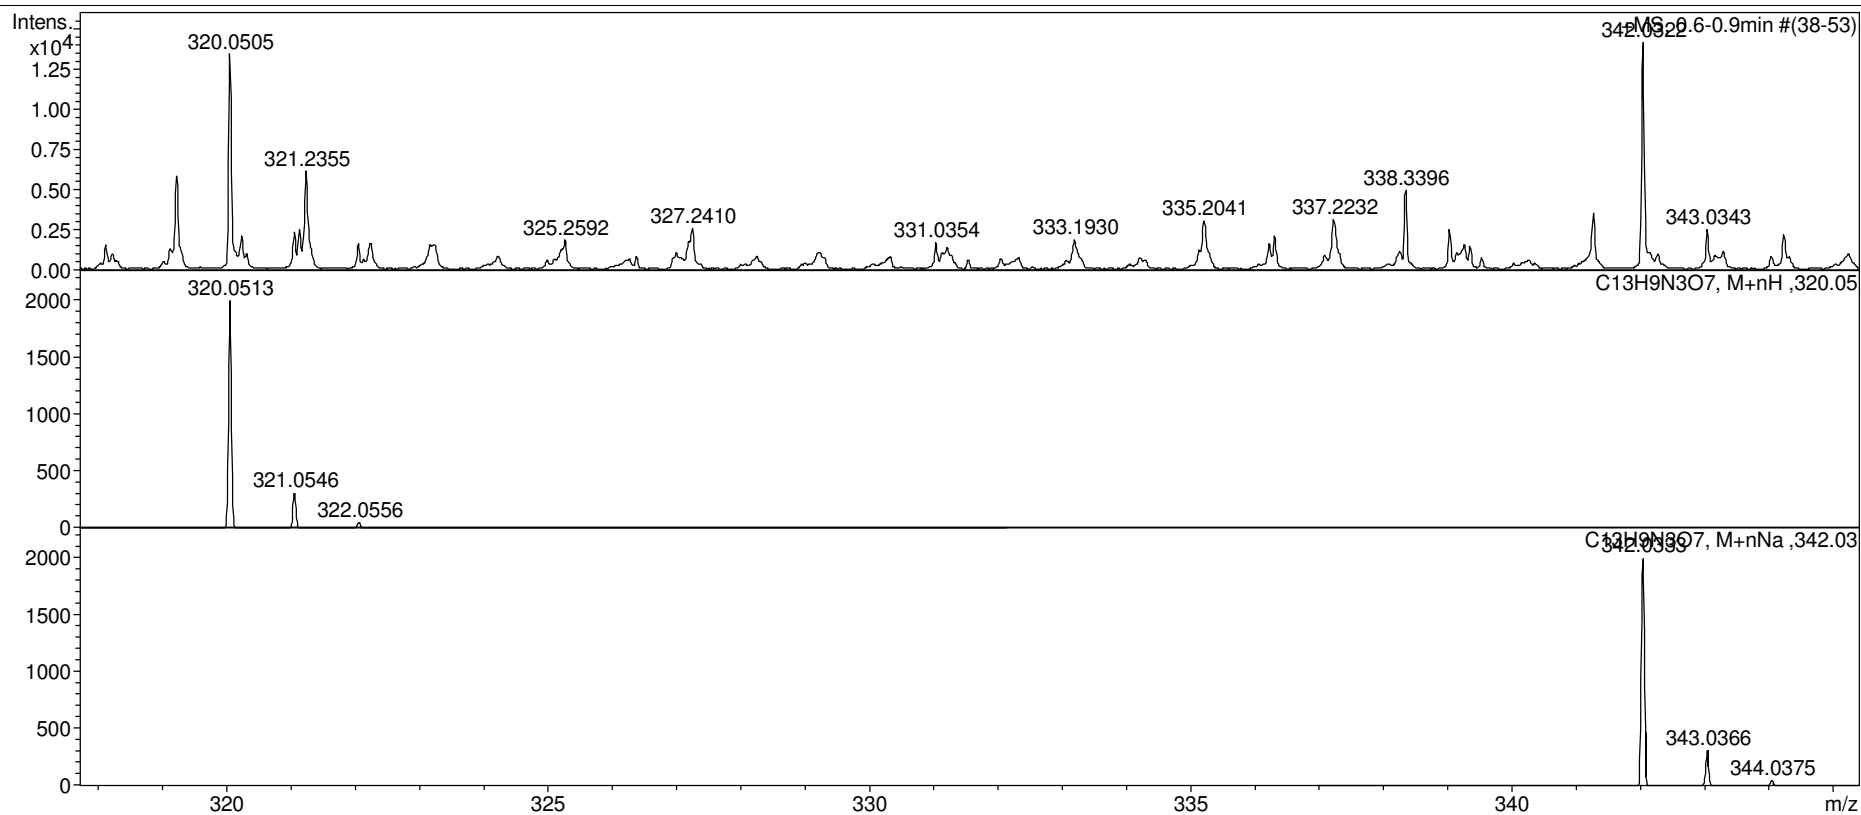

# Display Report

## Analysis Info

Analysis Name D:\Data\Kolotyrkina\2021\Bastrakov\0428027.d  
Method tune\_50-1600.m  
Sample Name /LPIK AF-427  
Comment C13H9N3O7 mH 320.0513 clb added CH3OH

Acquisition Date 28.04.2021 13:01:04

Operator BDAL@DE  
Instrument / Ser# micrOTOF 10248

## Acquisition Parameter

|             |            |                      |          |                  |           |
|-------------|------------|----------------------|----------|------------------|-----------|
| Source Type | ESI        | Ion Polarity         | Positive | Set Nebulizer    | 1.0 Bar   |
| Focus       | Not active |                      |          | Set Dry Heater   | 200 °C    |
| Scan Begin  | 50 m/z     | Set Capillary        | 4500 V   | Set Dry Gas      | 4.0 l/min |
| Scan End    | 1600 m/z   | Set End Plate Offset | -500 V   | Set Divert Valve | Waste     |

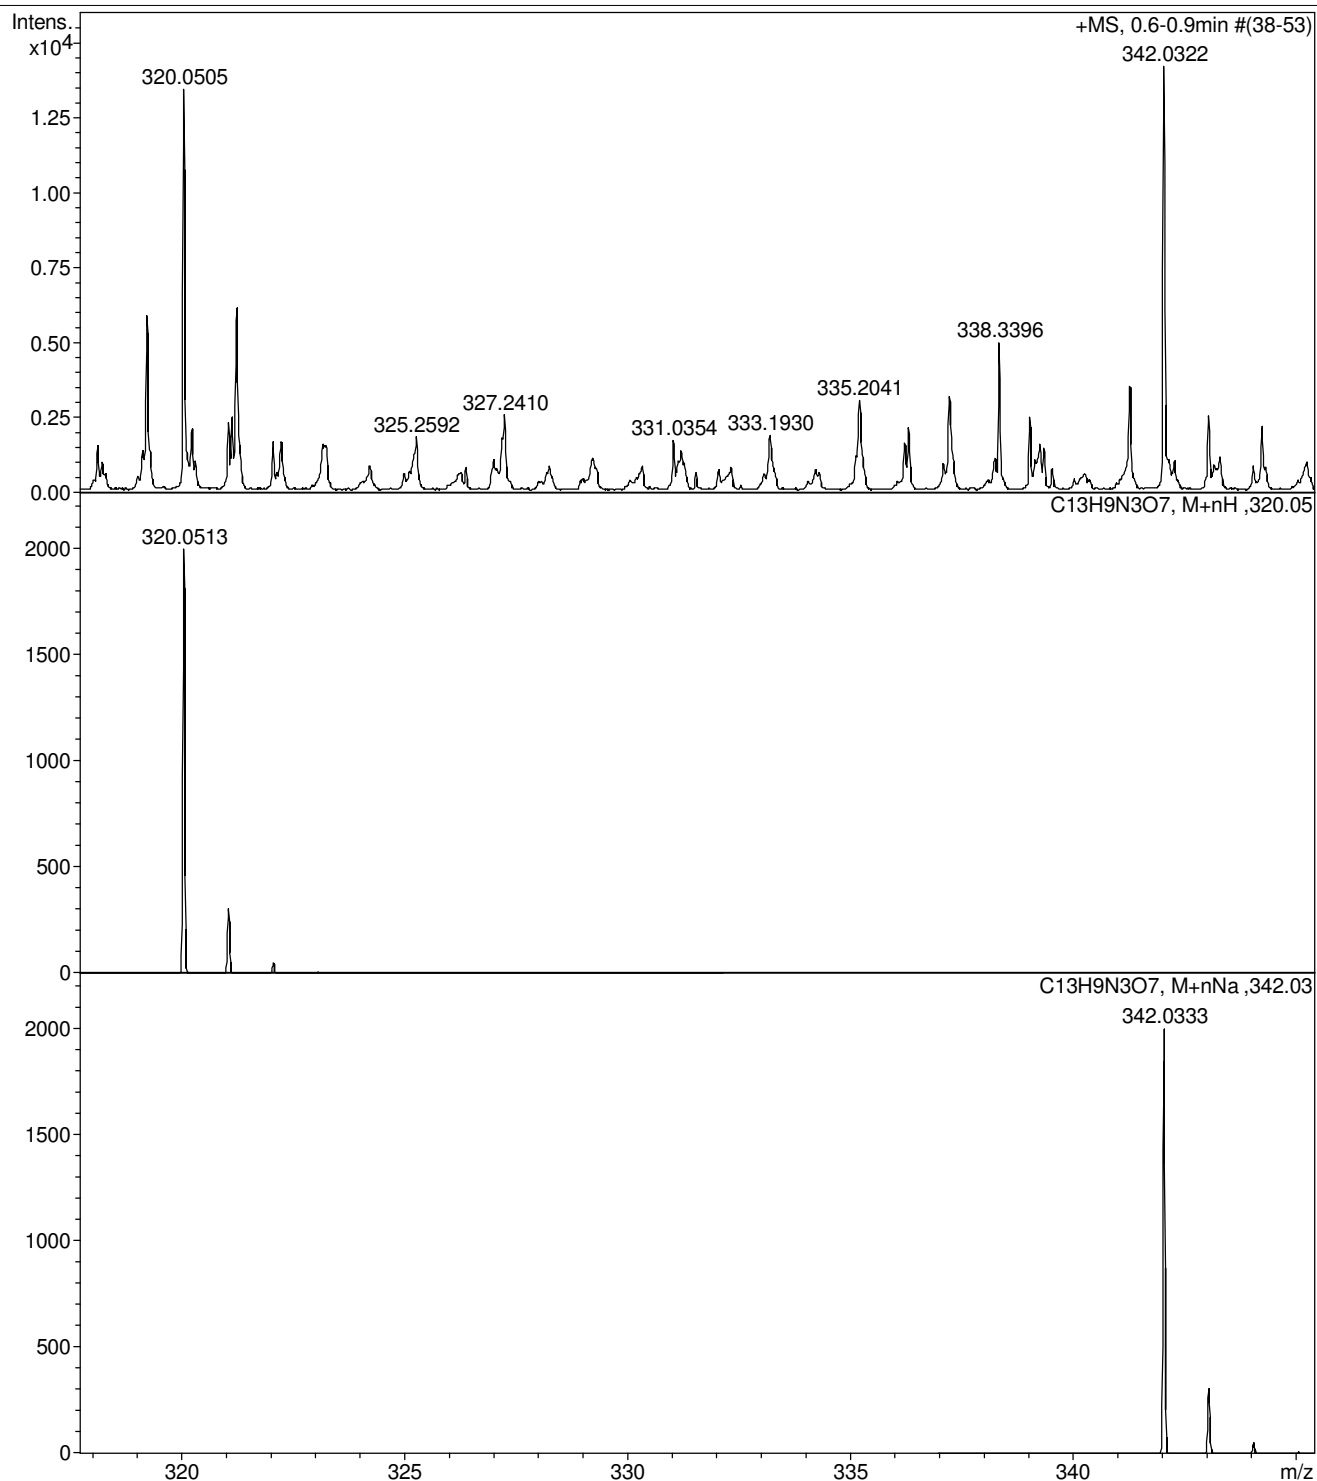



/LPIK AF428

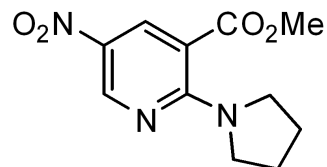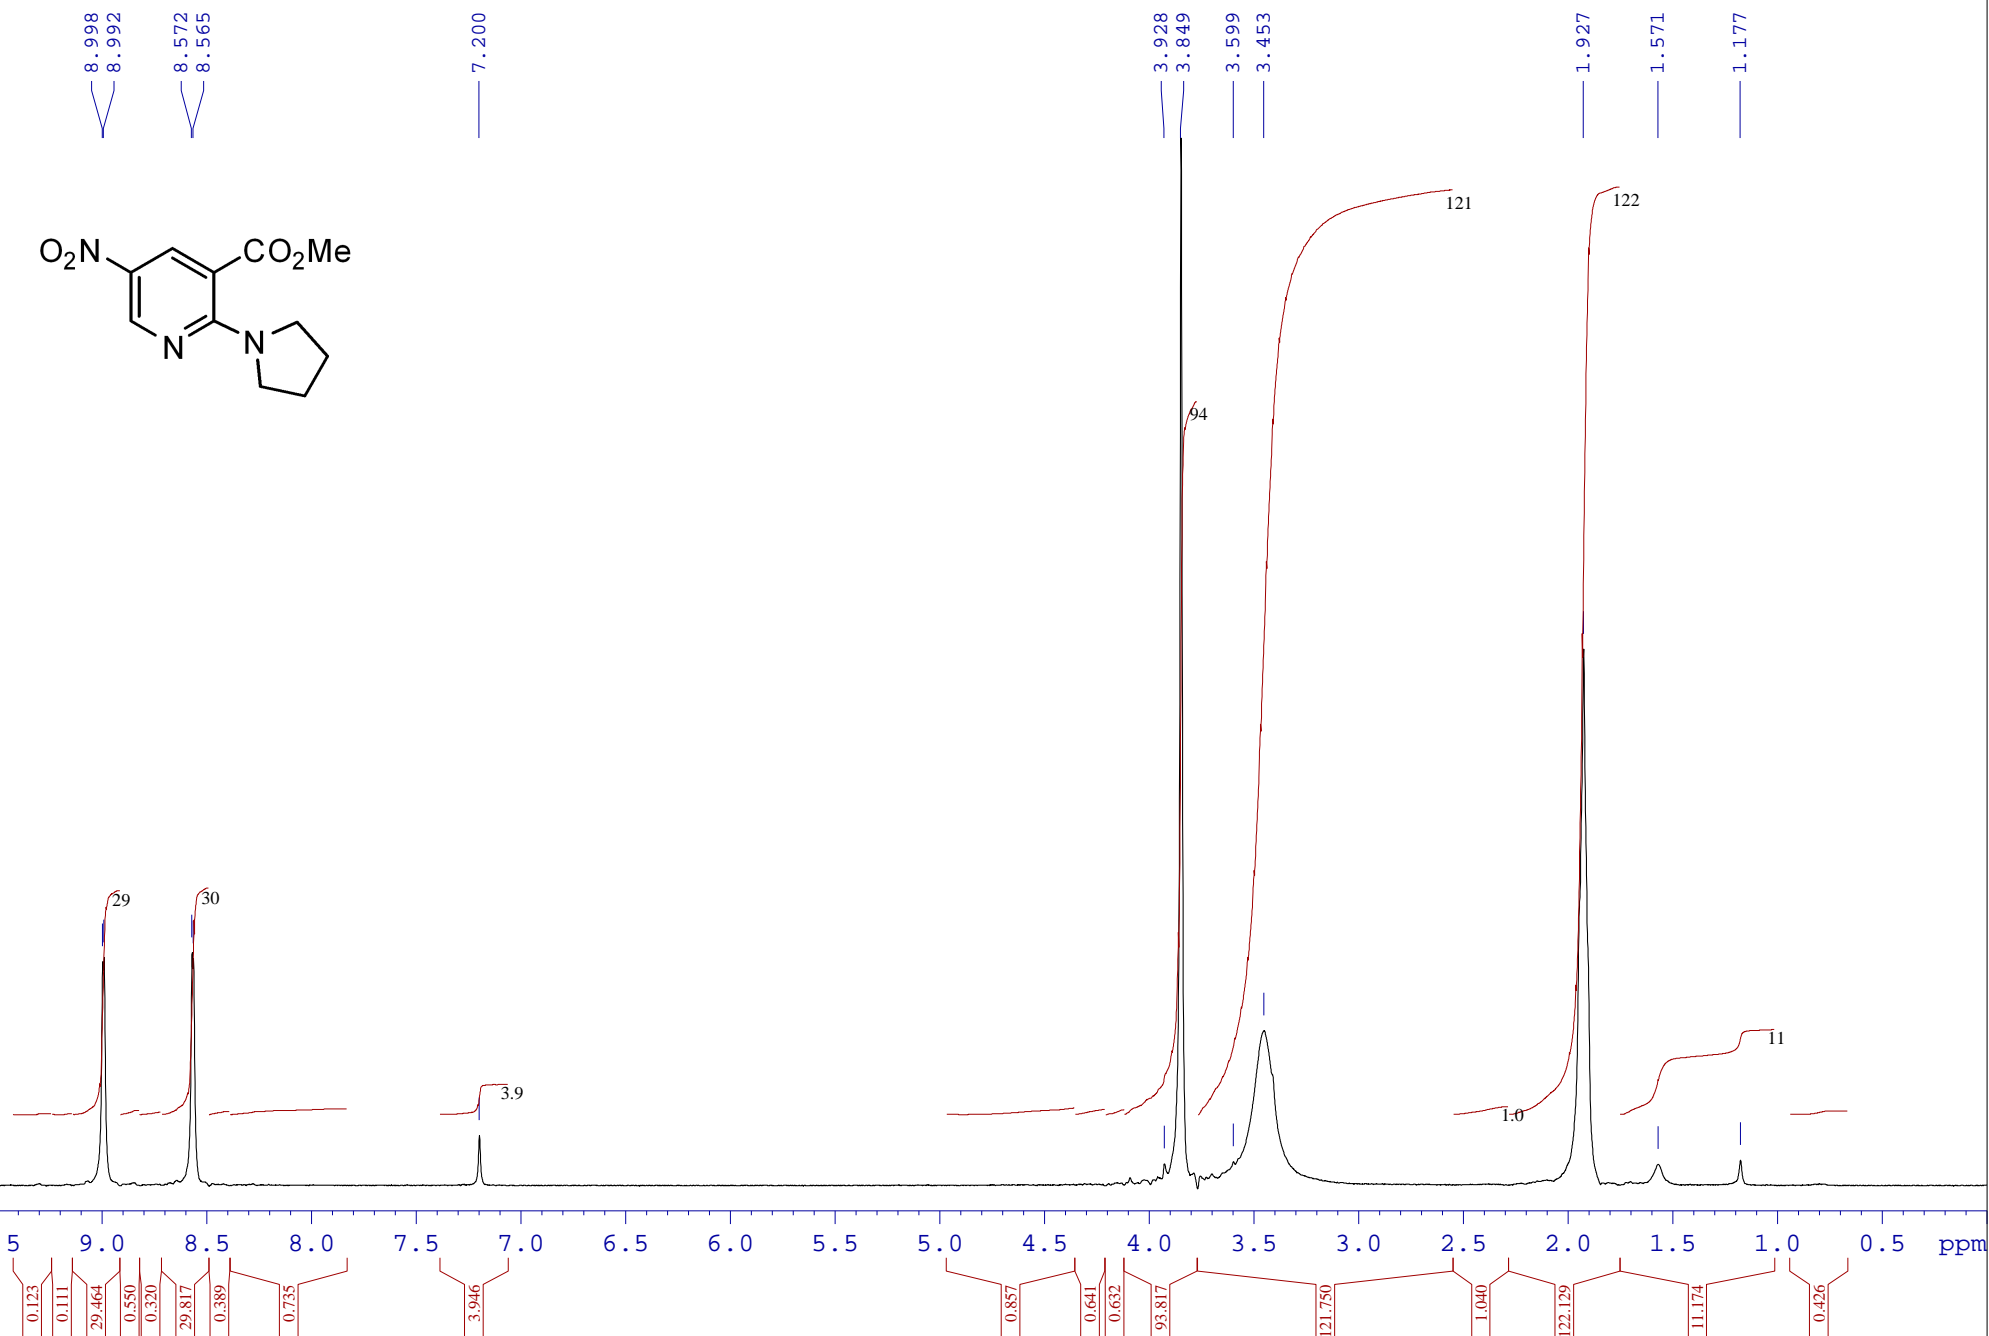



# /LPIK AF-428.13 Kokorekin-20259

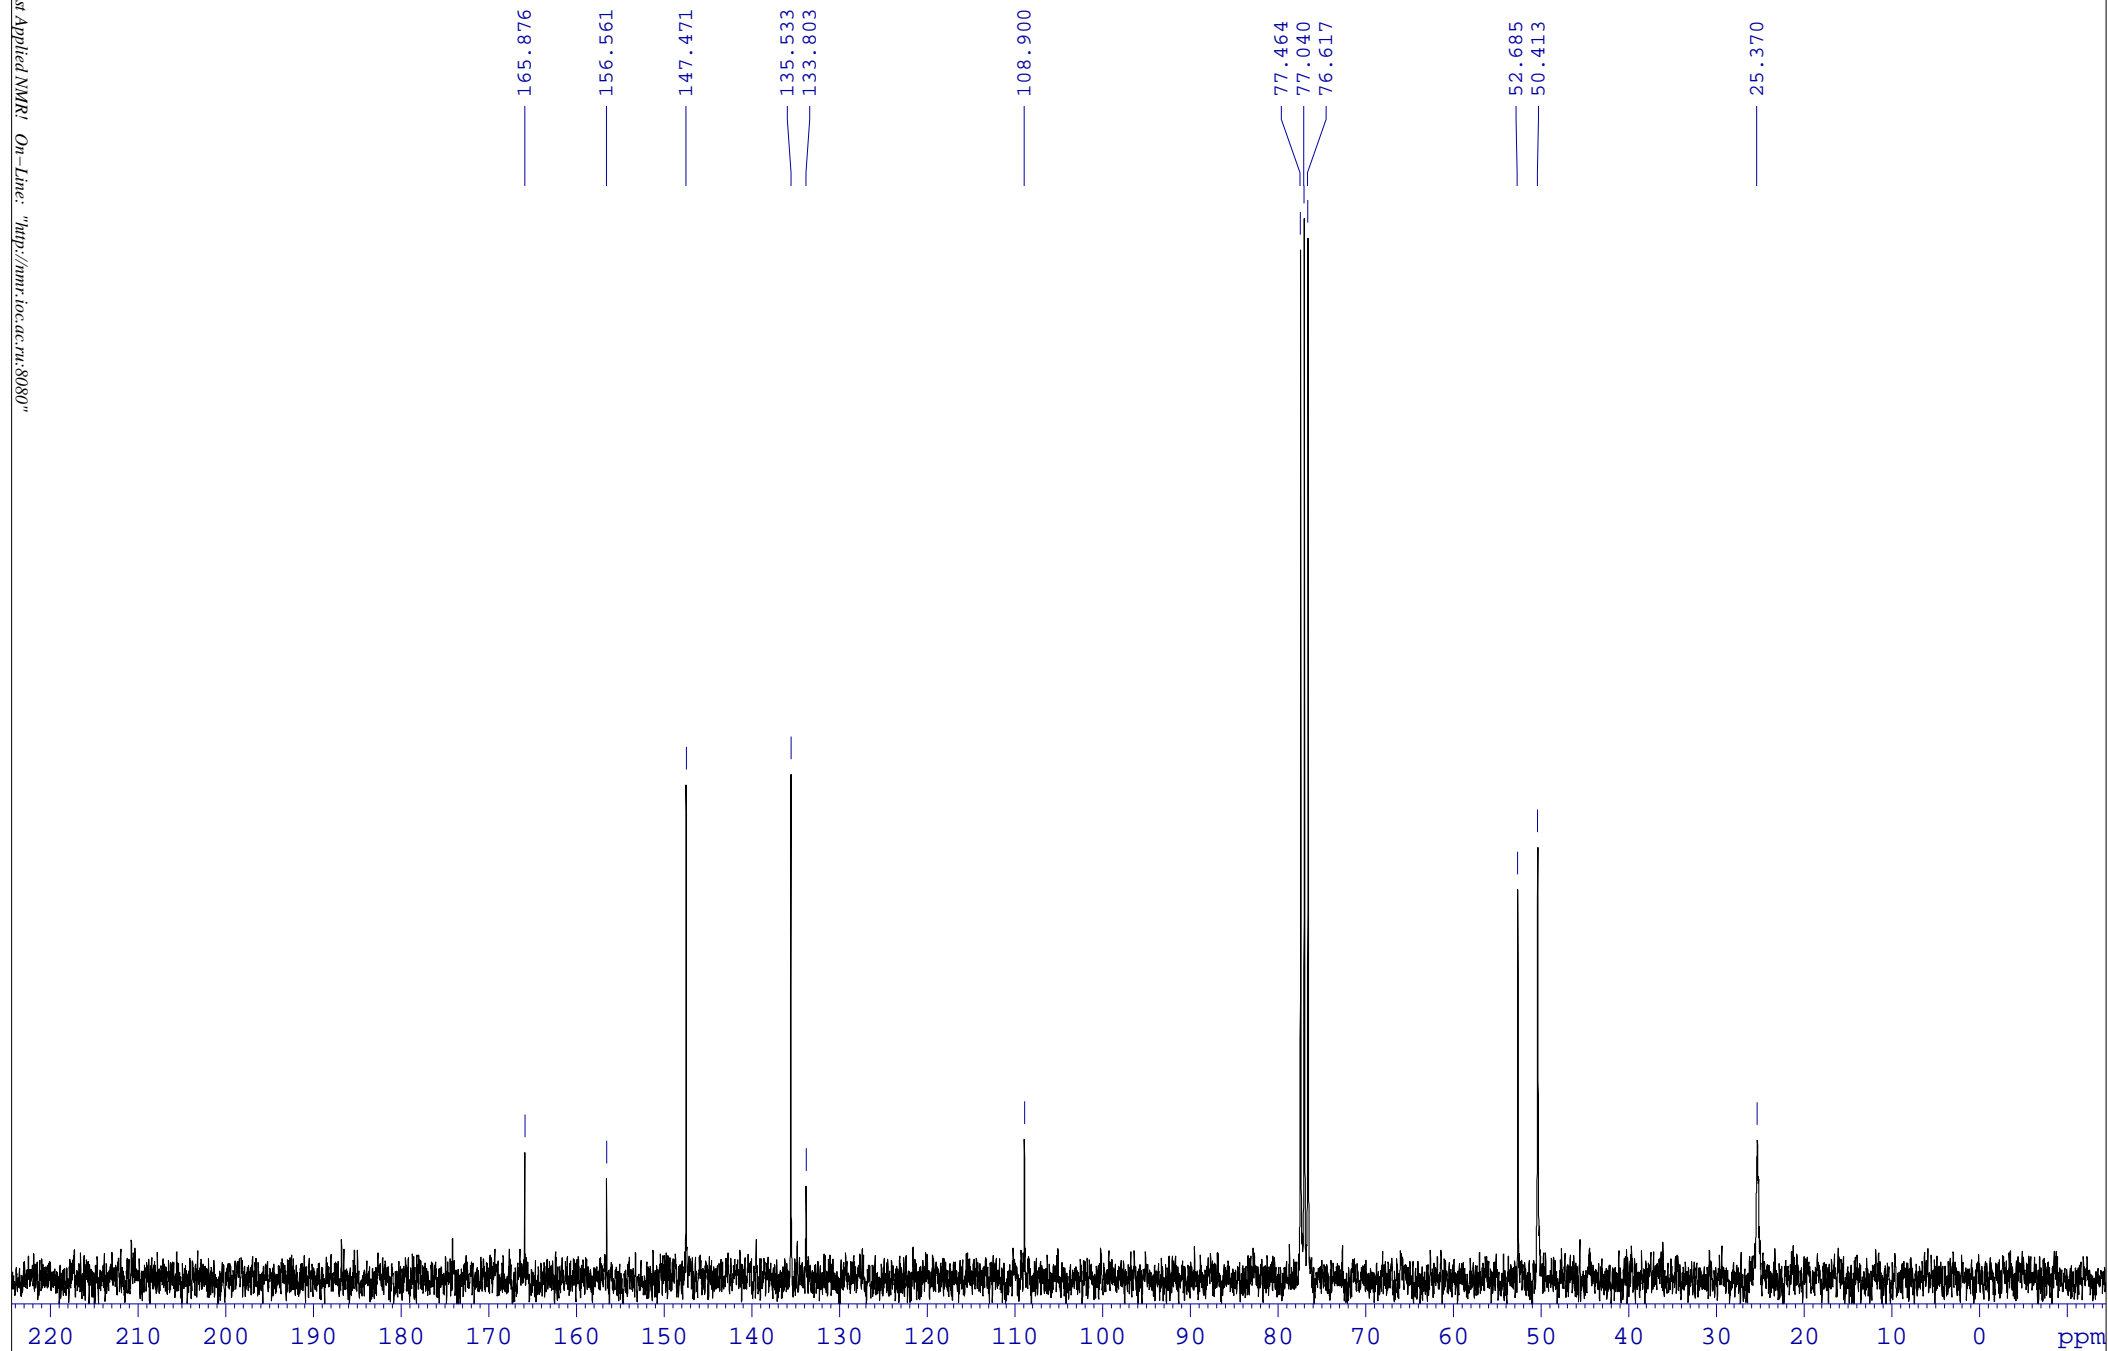

# Display Report

## Analysis Info

Analysis Name D:\Data\Kolotyrkina\2021\Bastrakov\0428028.d  
Method tune\_50-1600.m  
Sample Name /LPIK AF-428  
Comment C11H13N3O4 mH 252.0978 clb added CH3OH

Acquisition Date 28.04.2021 13:16:27

Operator BDAL@DE  
Instrument / Ser# micrOTOF 10248

## Acquisition Parameter

|             |            |                      |          |                  |           |
|-------------|------------|----------------------|----------|------------------|-----------|
| Source Type | ESI        | Ion Polarity         | Positive | Set Nebulizer    | 1.0 Bar   |
| Focus       | Not active |                      |          | Set Dry Heater   | 200 °C    |
| Scan Begin  | 50 m/z     | Set Capillary        | 4500 V   | Set Dry Gas      | 4.0 l/min |
| Scan End    | 1600 m/z   | Set End Plate Offset | -500 V   | Set Divert Valve | Waste     |

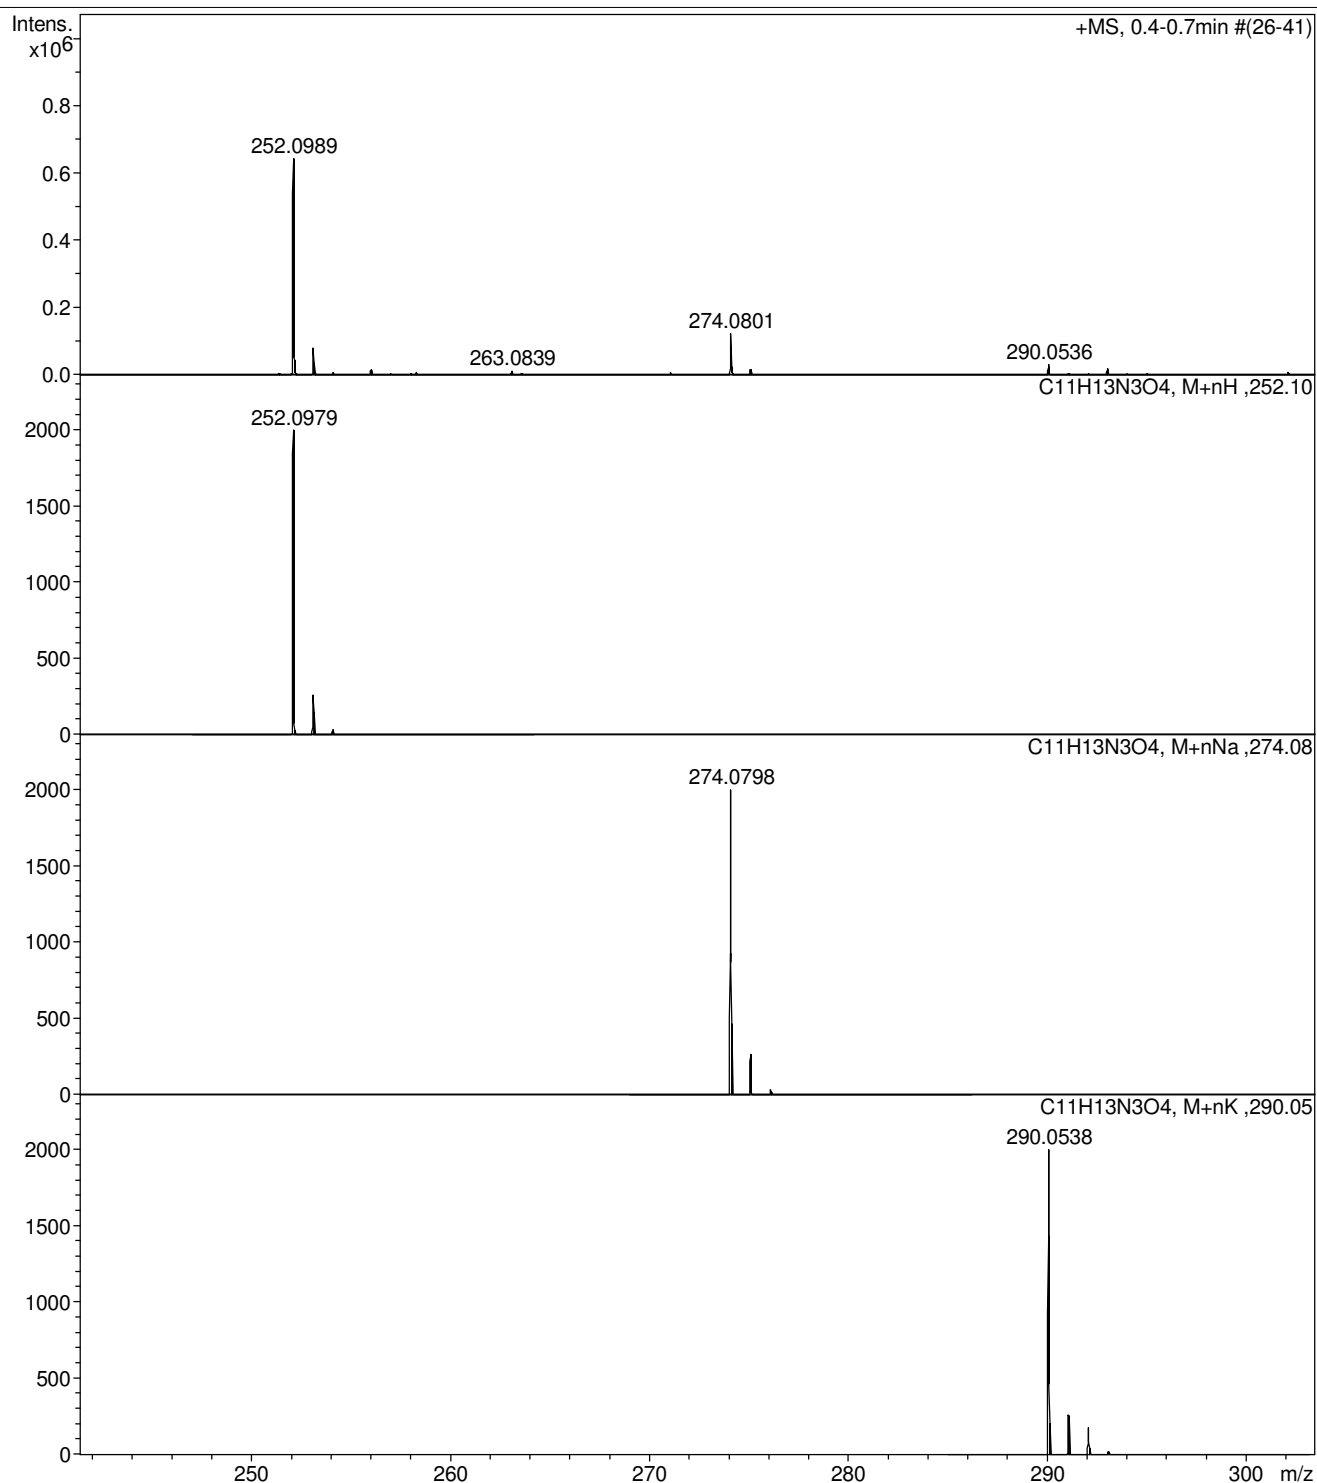



# /LPIK AF-365.3 Kokorekin-20259

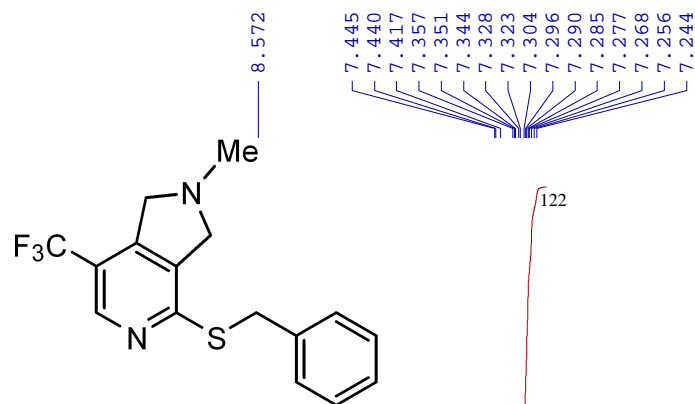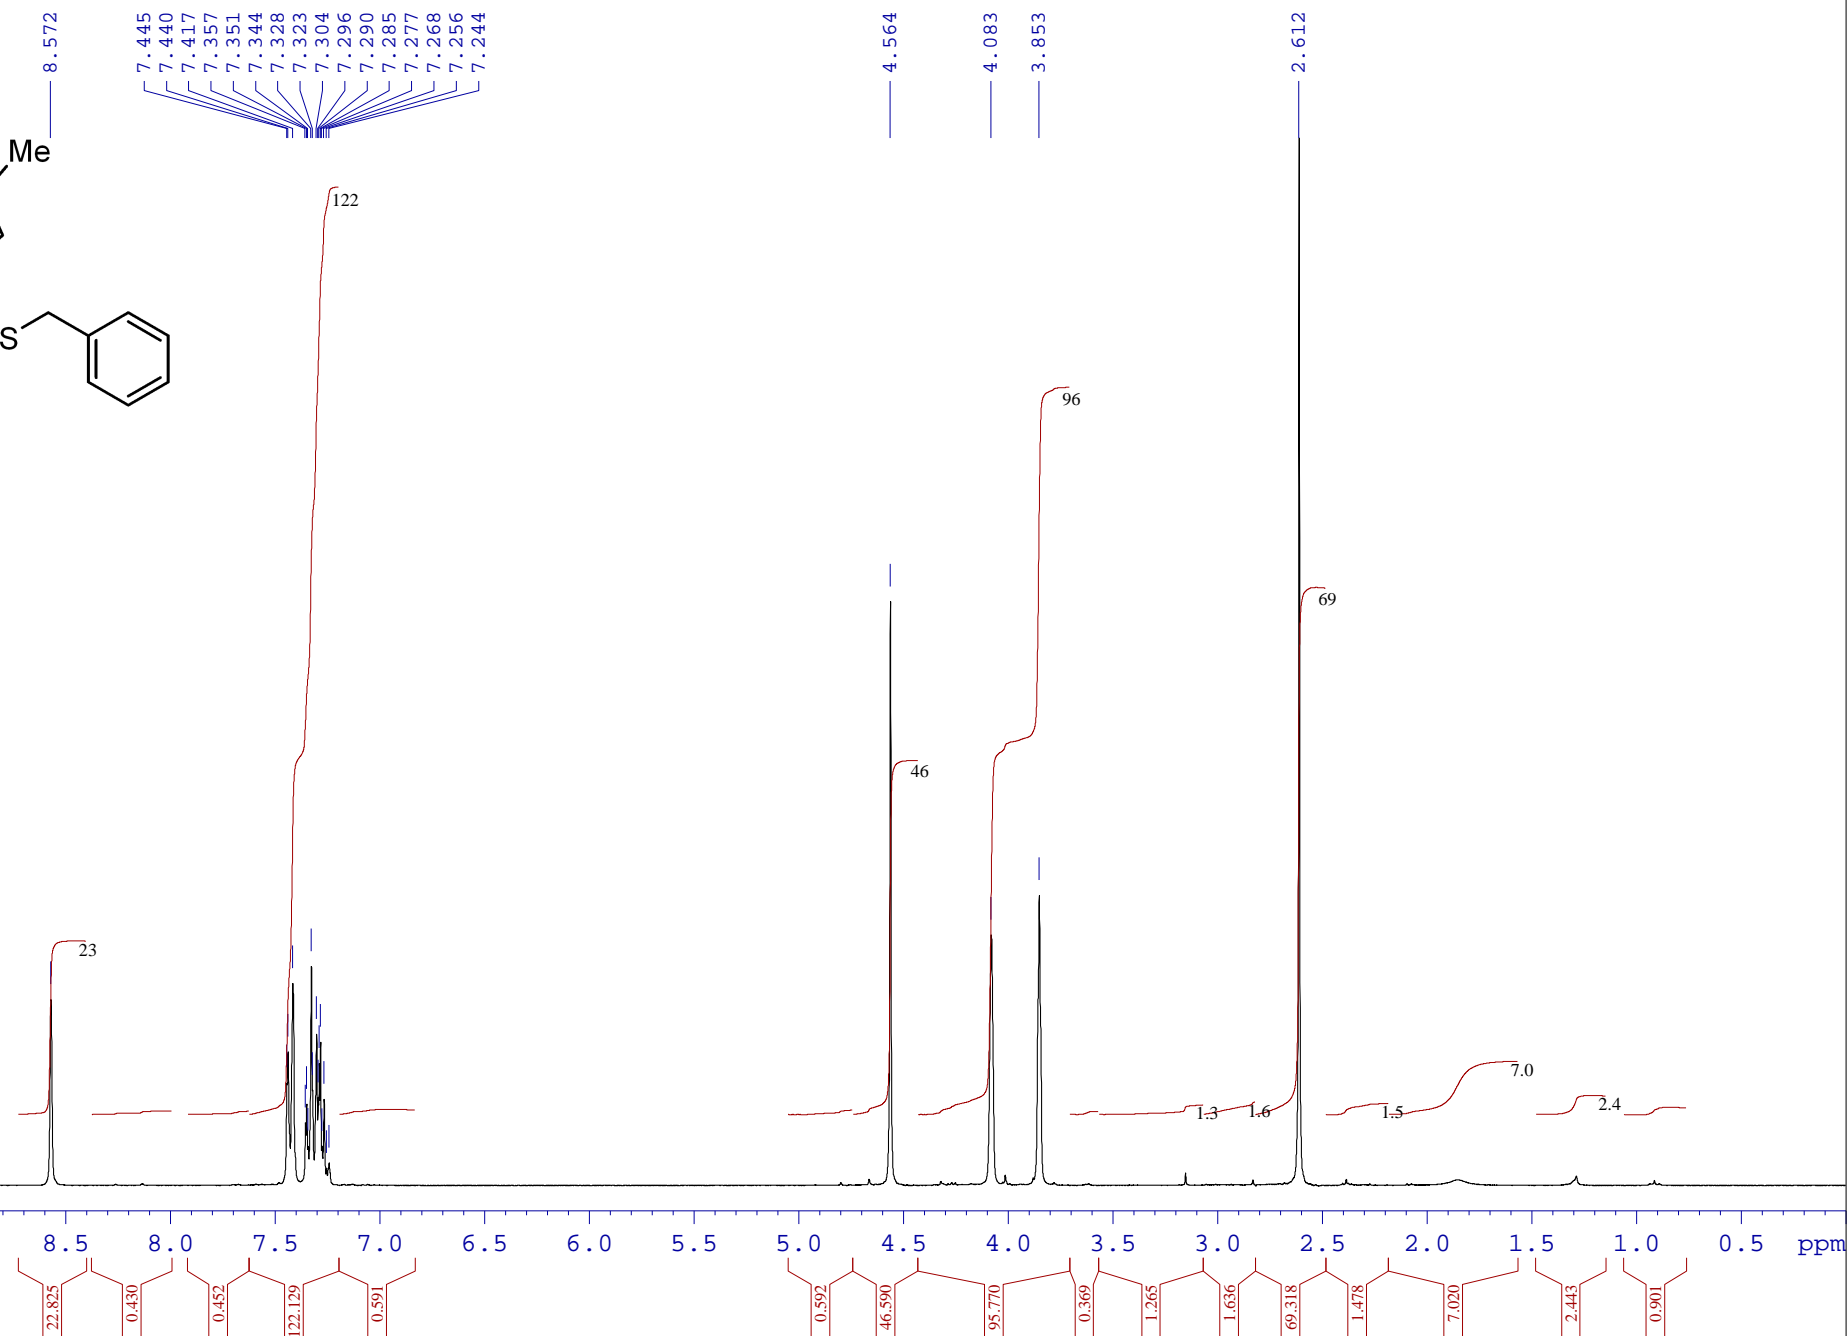





# /LPIK AF-365.1.13 Kokorekin-20259

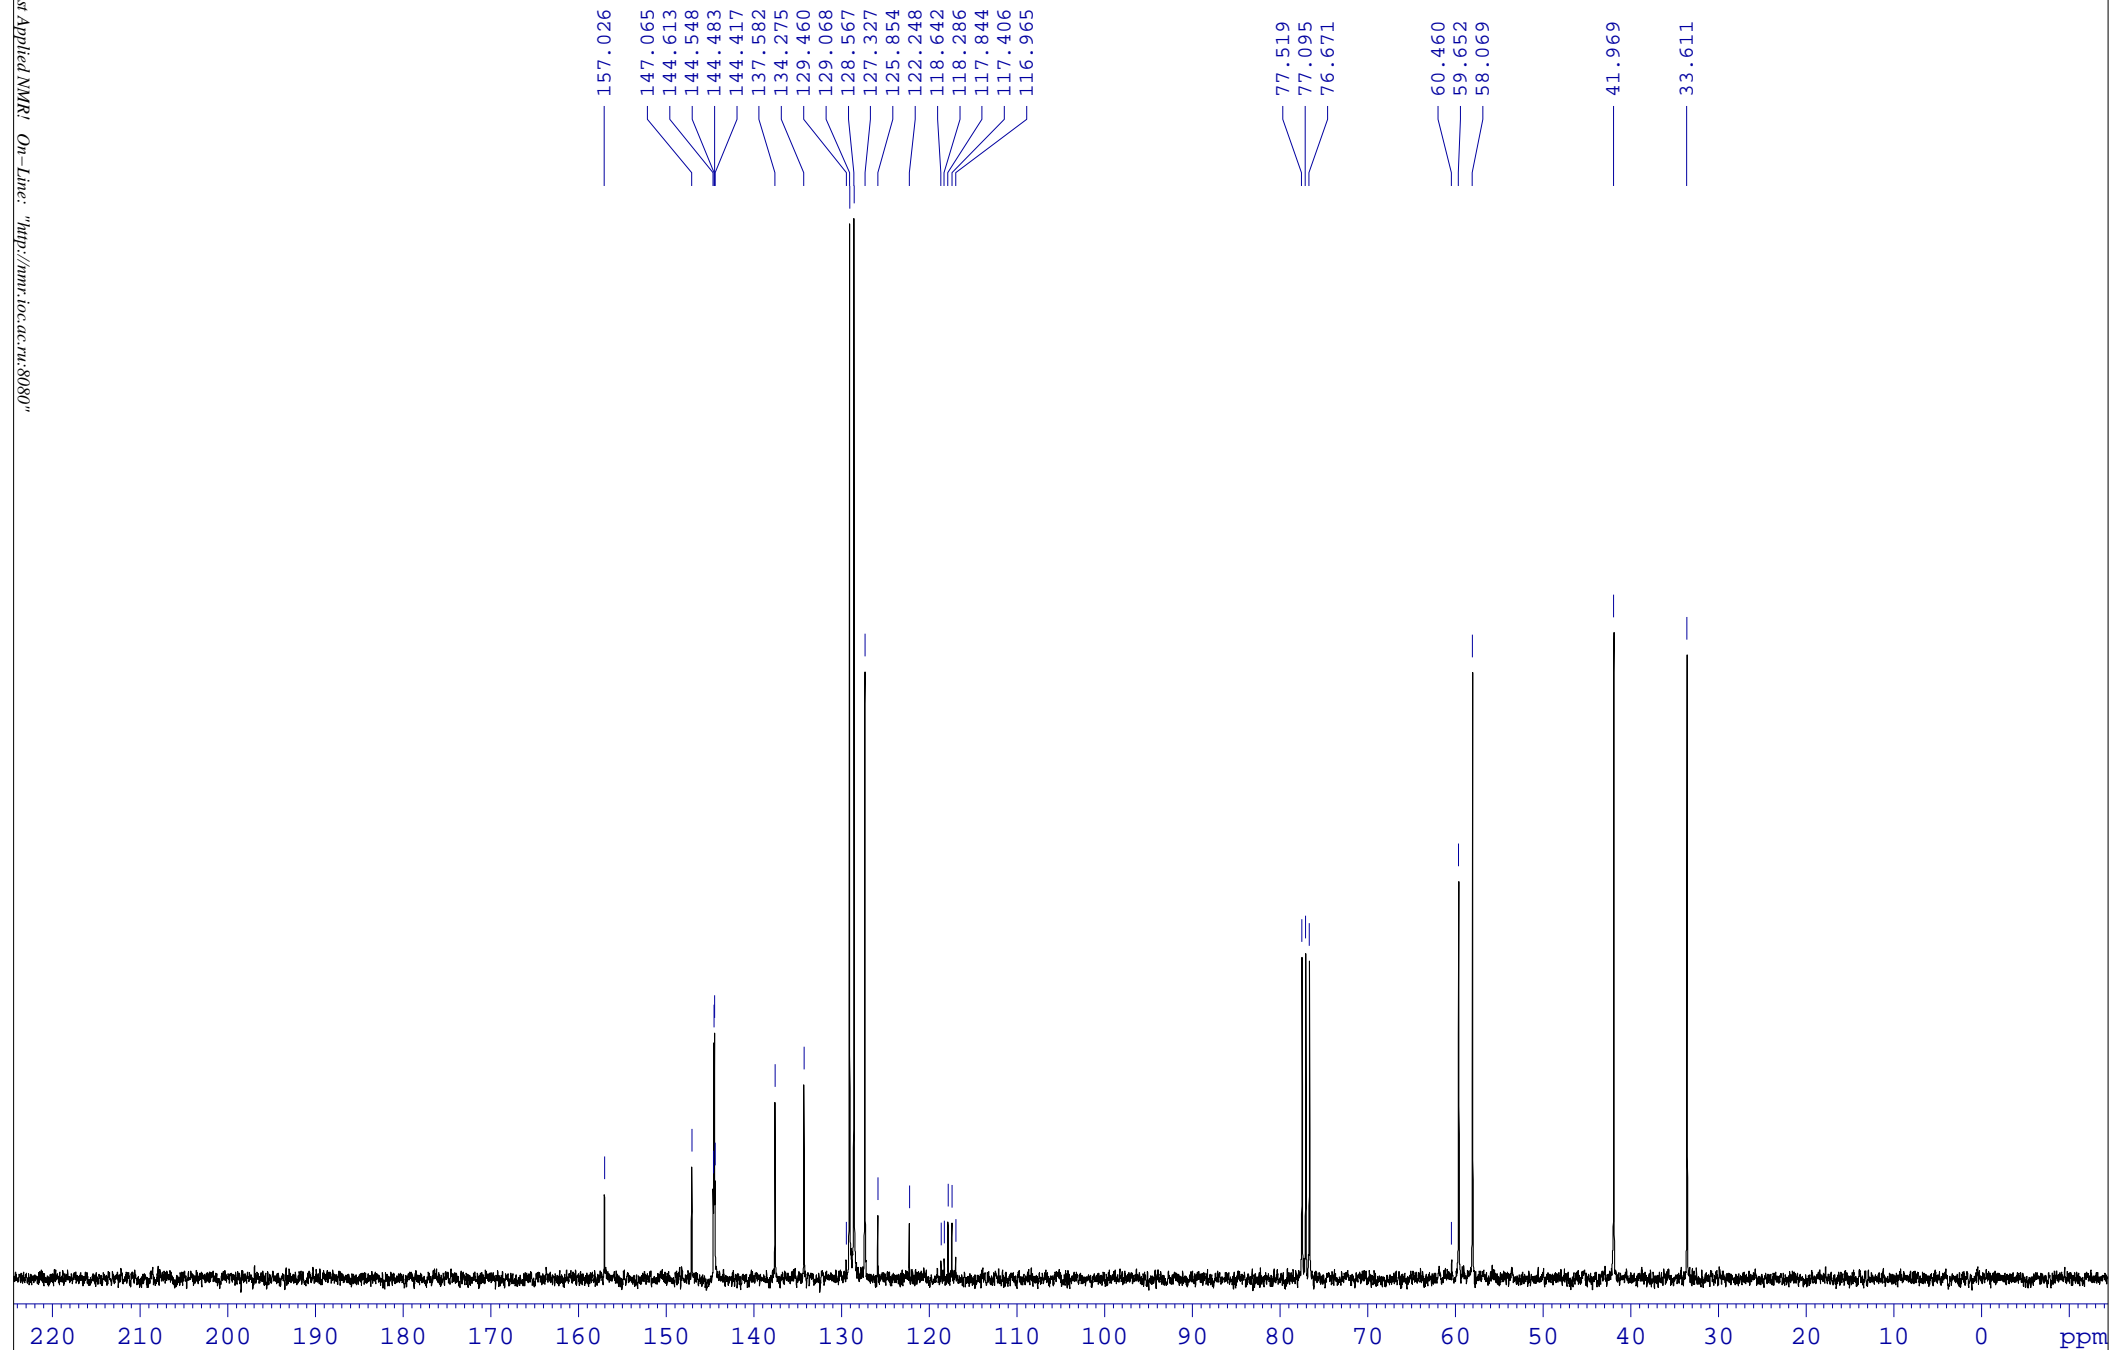

# Display Report

## Analysis Info

Analysis Name D:\Data\Kolotyrkina\2021\Bastrakov\0211015.d  
Method tune\_50-1600.m  
Sample Name /lpik AF-365  
Comment C16H15F3N2S mH 325.0980 alibrant added CH3OH

Acquisition Date 11.02.2021 11:47:29

Operator BDAL@DE  
Instrument / Ser# micrOTOF 10248

## Acquisition Parameter

|             |            |                      |          |                  |           |
|-------------|------------|----------------------|----------|------------------|-----------|
| Source Type | ESI        | Ion Polarity         | Positive | Set Nebulizer    | 1.0 Bar   |
| Focus       | Not active |                      |          | Set Dry Heater   | 200 °C    |
| Scan Begin  | 50 m/z     | Set Capillary        | 4500 V   | Set Dry Gas      | 4.0 l/min |
| Scan End    | 1600 m/z   | Set End Plate Offset | -500 V   | Set Divert Valve | Waste     |

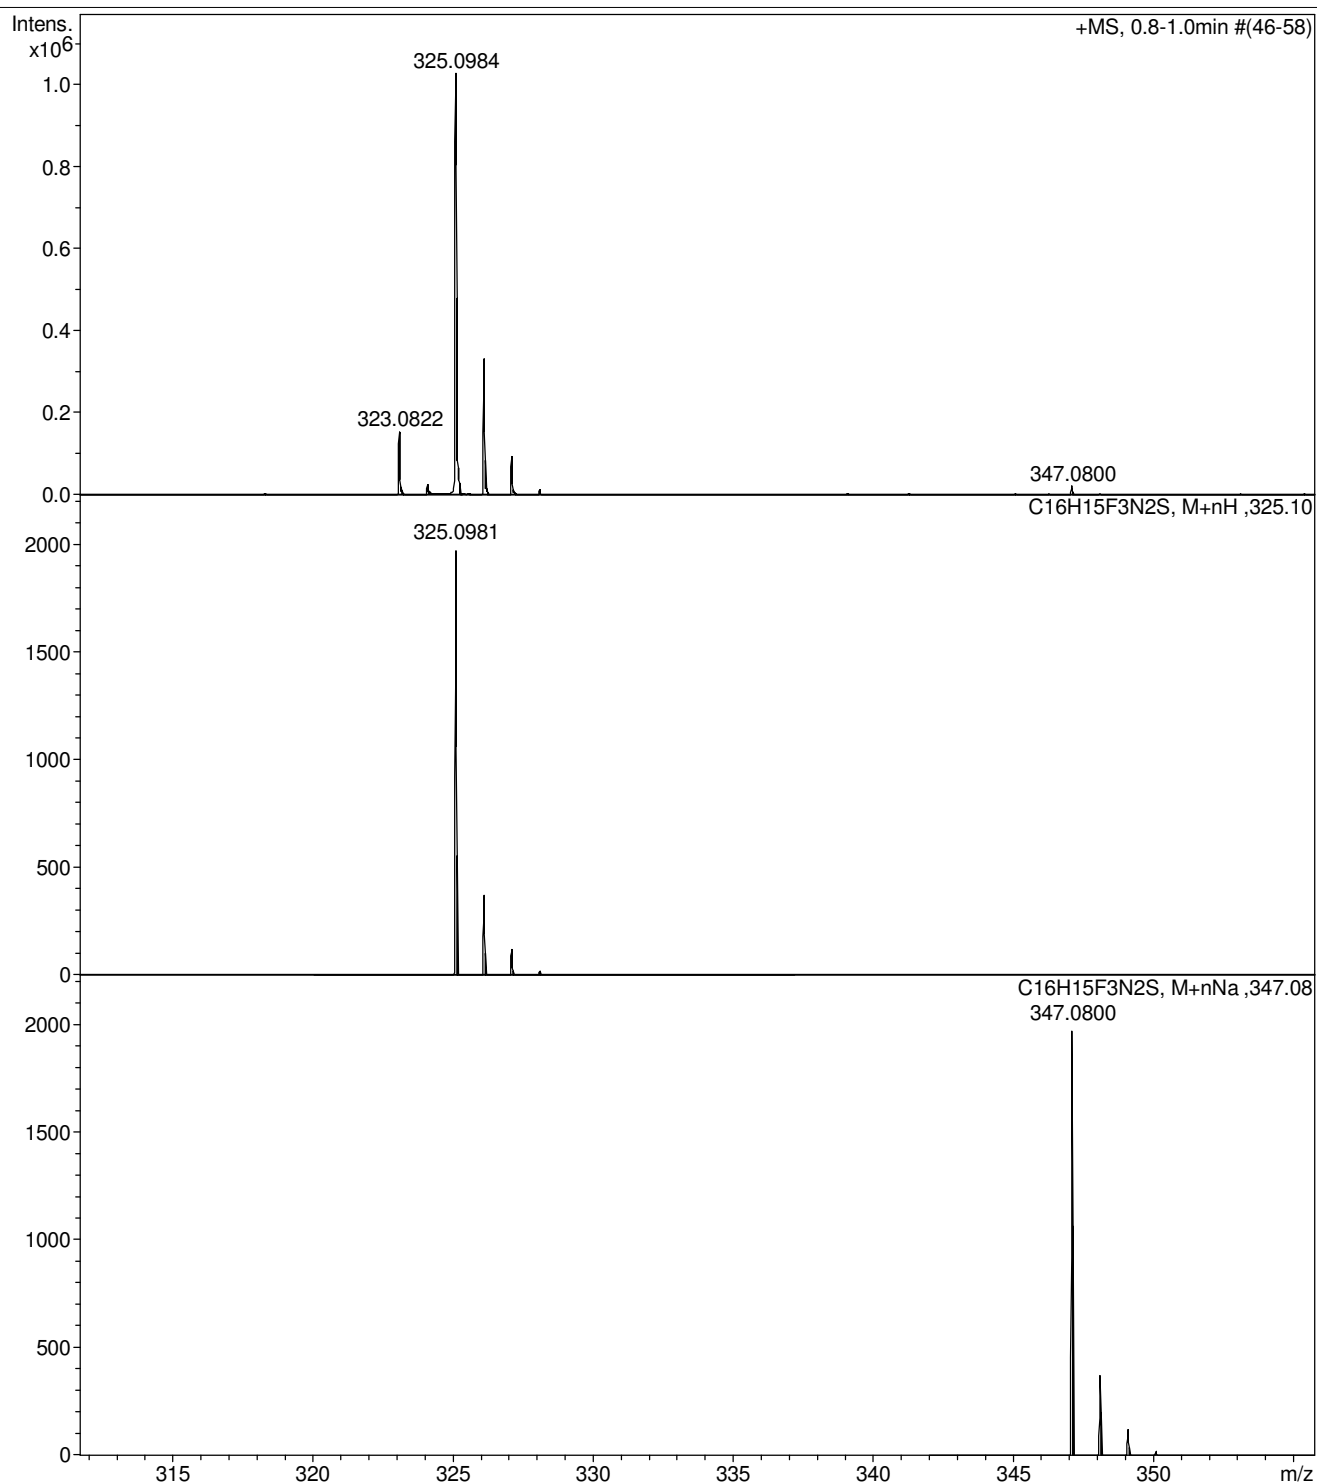



/LPIK AF-367.R

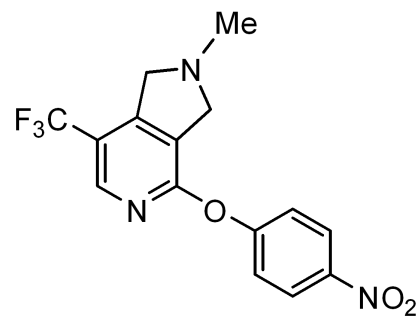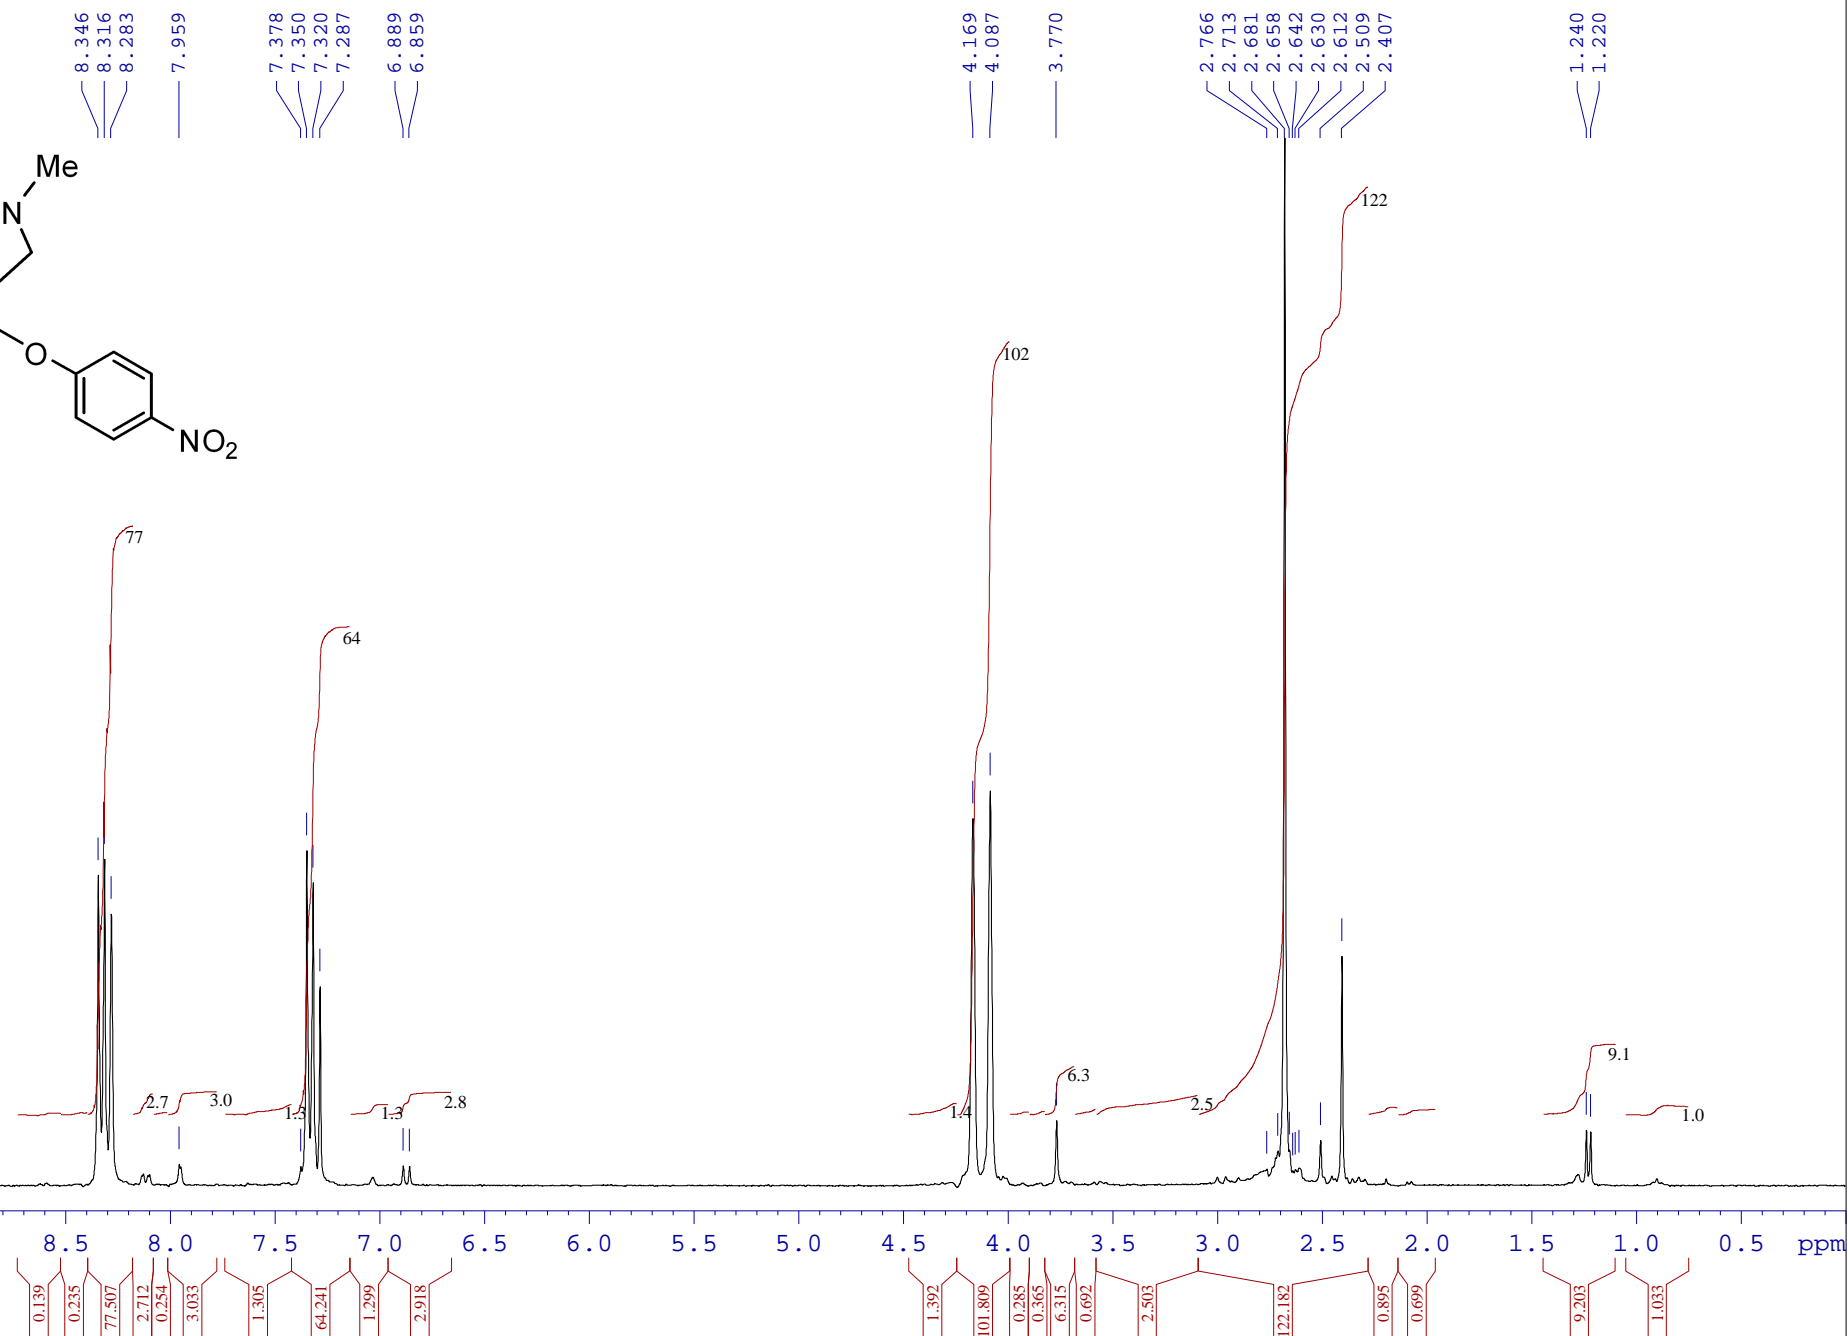



/LPIK AF-367.C13 CDCl3 13C 20mg 1024scans

159.021  
158.066  
153.031  
144.728  
143.801  
143.732  
143.665  
125.514  
125.223  
124.485  
121.750  
77.453  
77.228  
77.029  
76.606  
59.866  
56.996  
44.345  
41.937

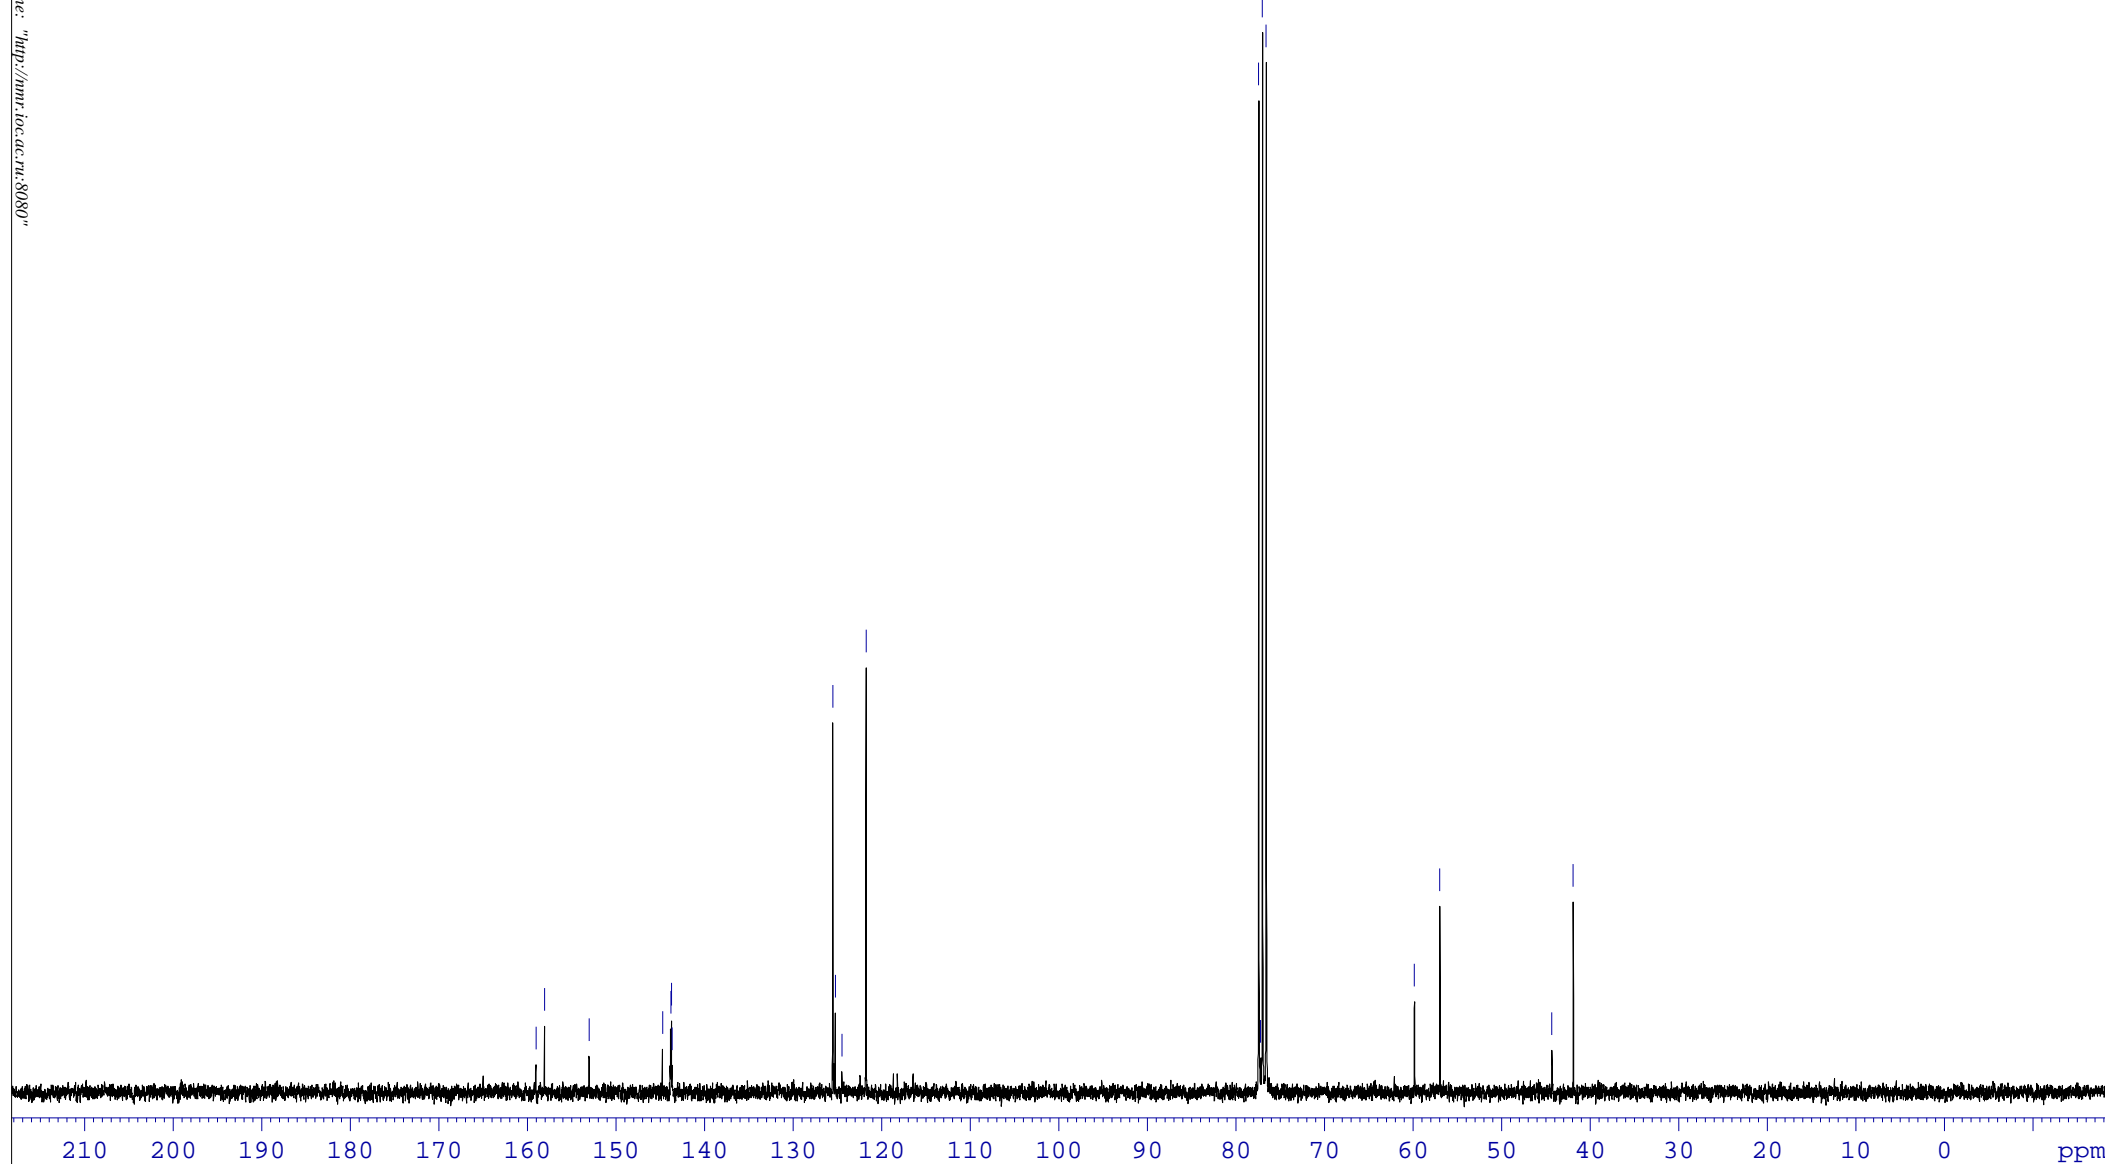

# Display Report

## Analysis Info

Analysis Name D:\Data\Kolotyrkina\2021\Bastrakov\0211016.d  
Method tune\_50-1600.m  
Sample Name /lpik AF-367  
Comment C15H12F3N3O3 mH 340.0903 alibrant added CH3OH

Acquisition Date 11.02.2021 11:56:34

Operator BDAL@DE  
Instrument / Ser# micrOTOF 10248

## Acquisition Parameter

|             |            |                      |          |                  |           |
|-------------|------------|----------------------|----------|------------------|-----------|
| Source Type | ESI        | Ion Polarity         | Positive | Set Nebulizer    | 1.0 Bar   |
| Focus       | Not active |                      |          | Set Dry Heater   | 200 °C    |
| Scan Begin  | 50 m/z     | Set Capillary        | 4500 V   | Set Dry Gas      | 4.0 l/min |
| Scan End    | 1600 m/z   | Set End Plate Offset | -500 V   | Set Divert Valve | Waste     |

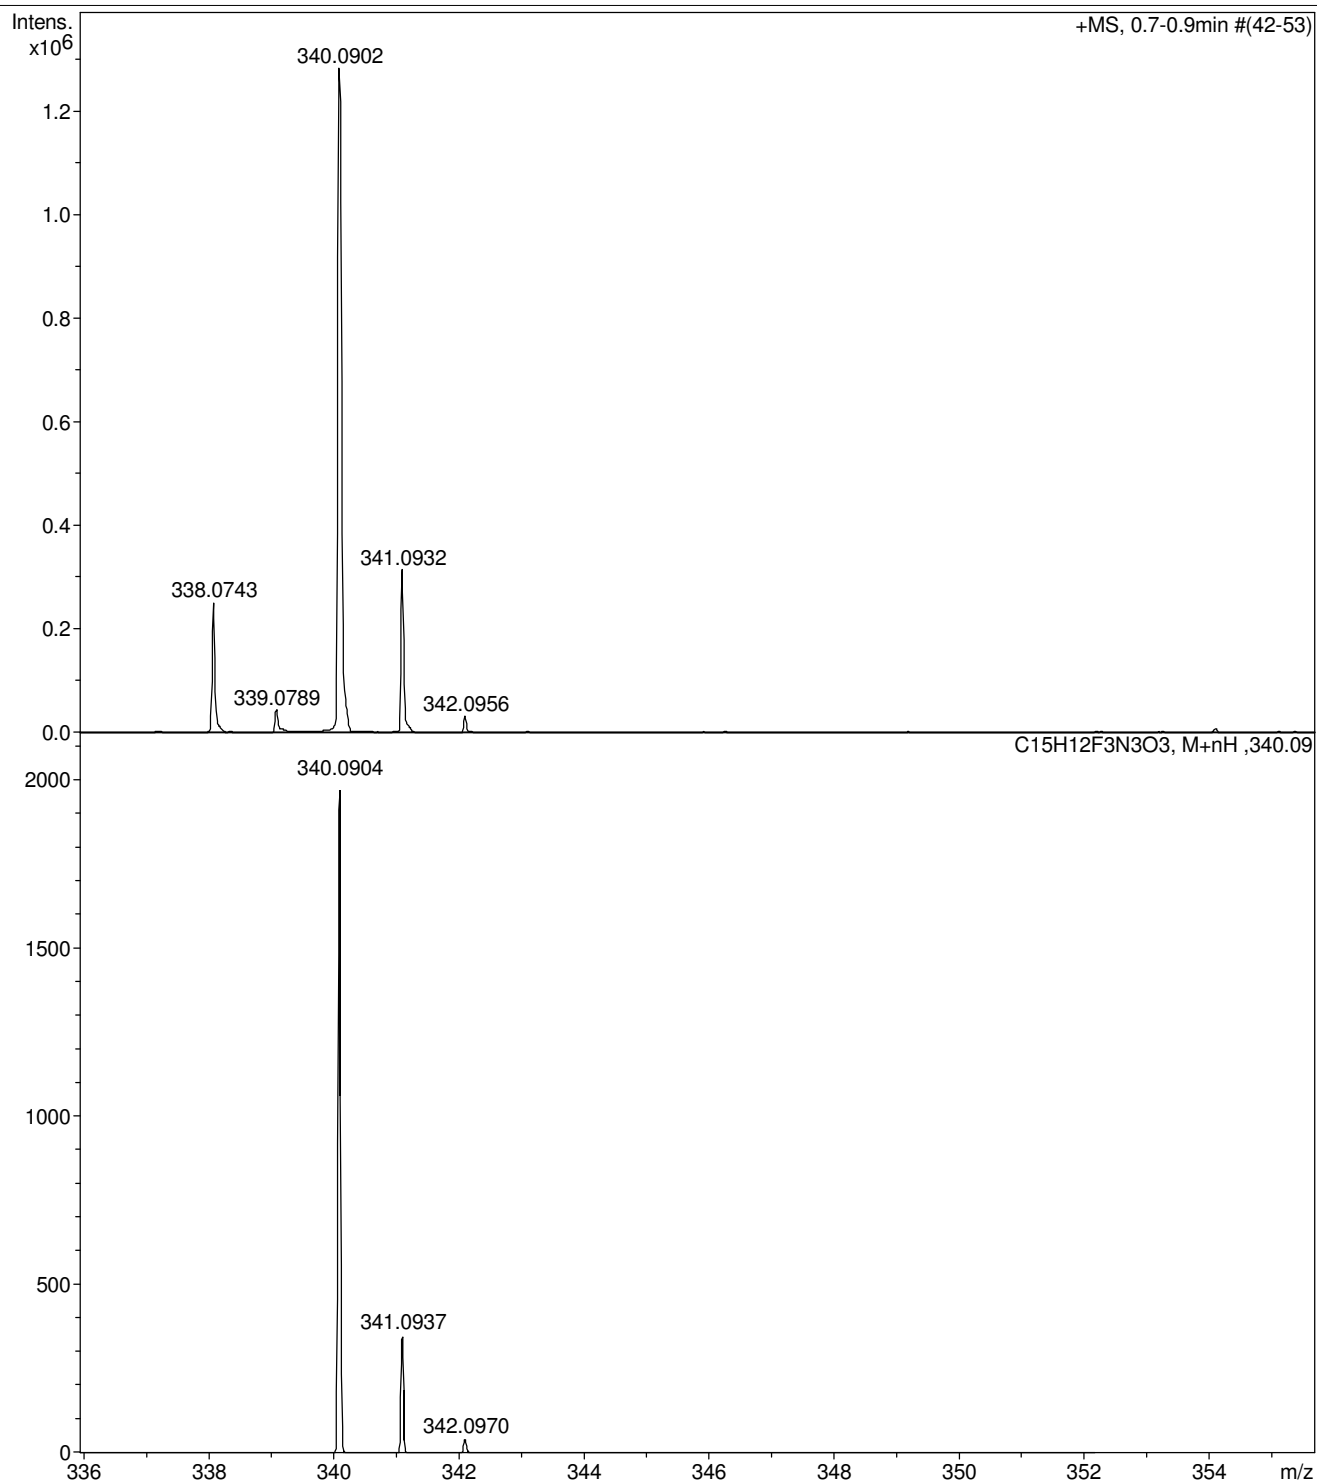



/LPIK AF-388

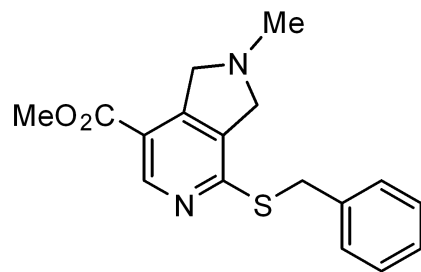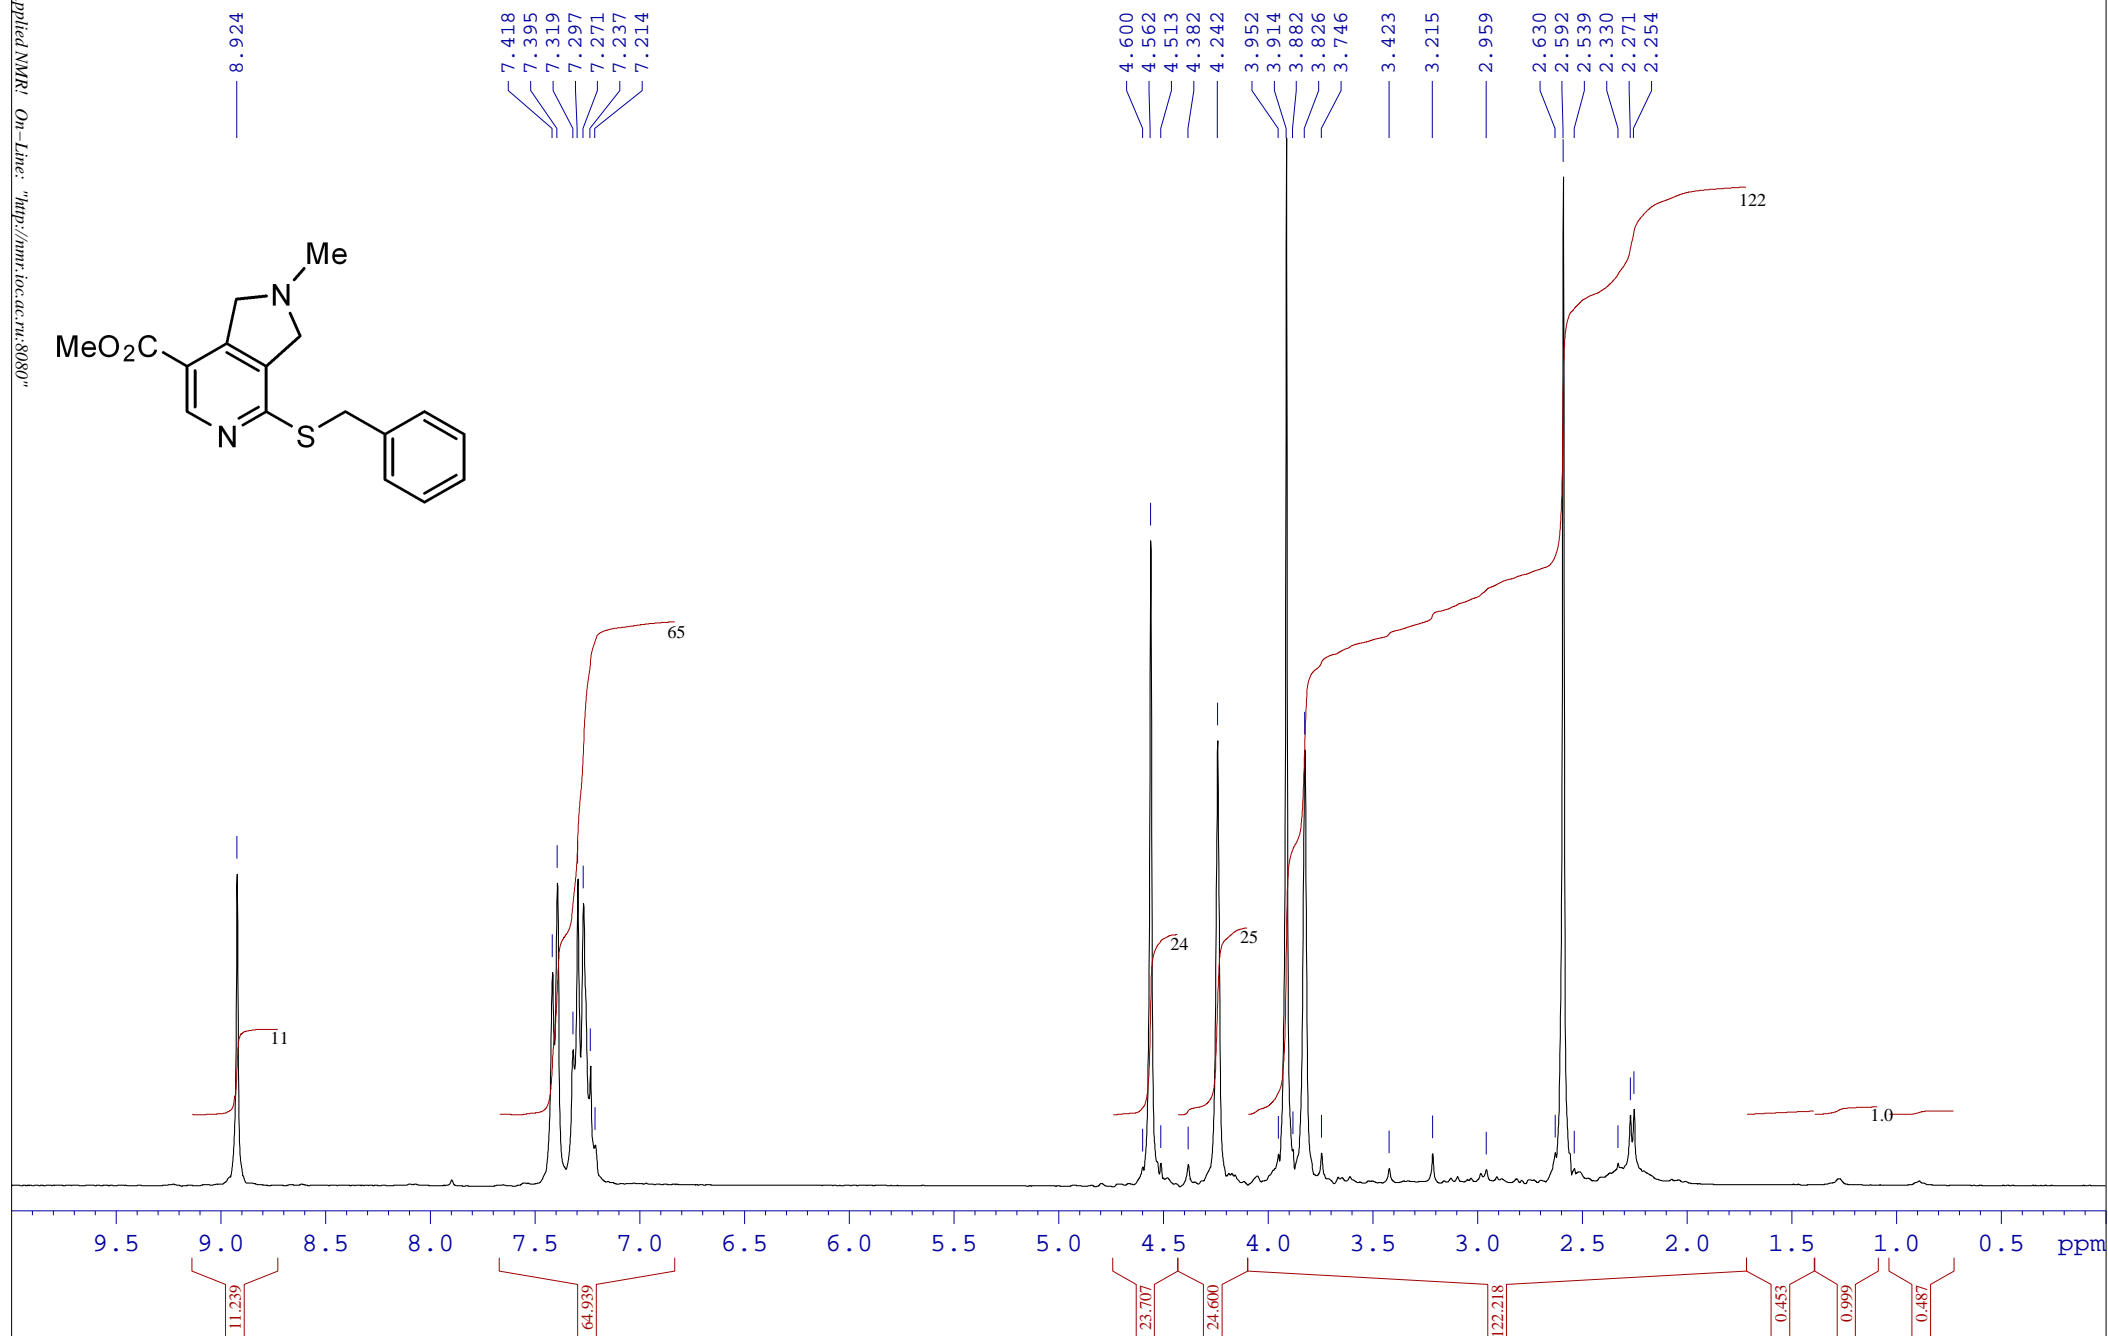



/LPIK AF-388.C13 CDCl3 13C 25mg 512scans

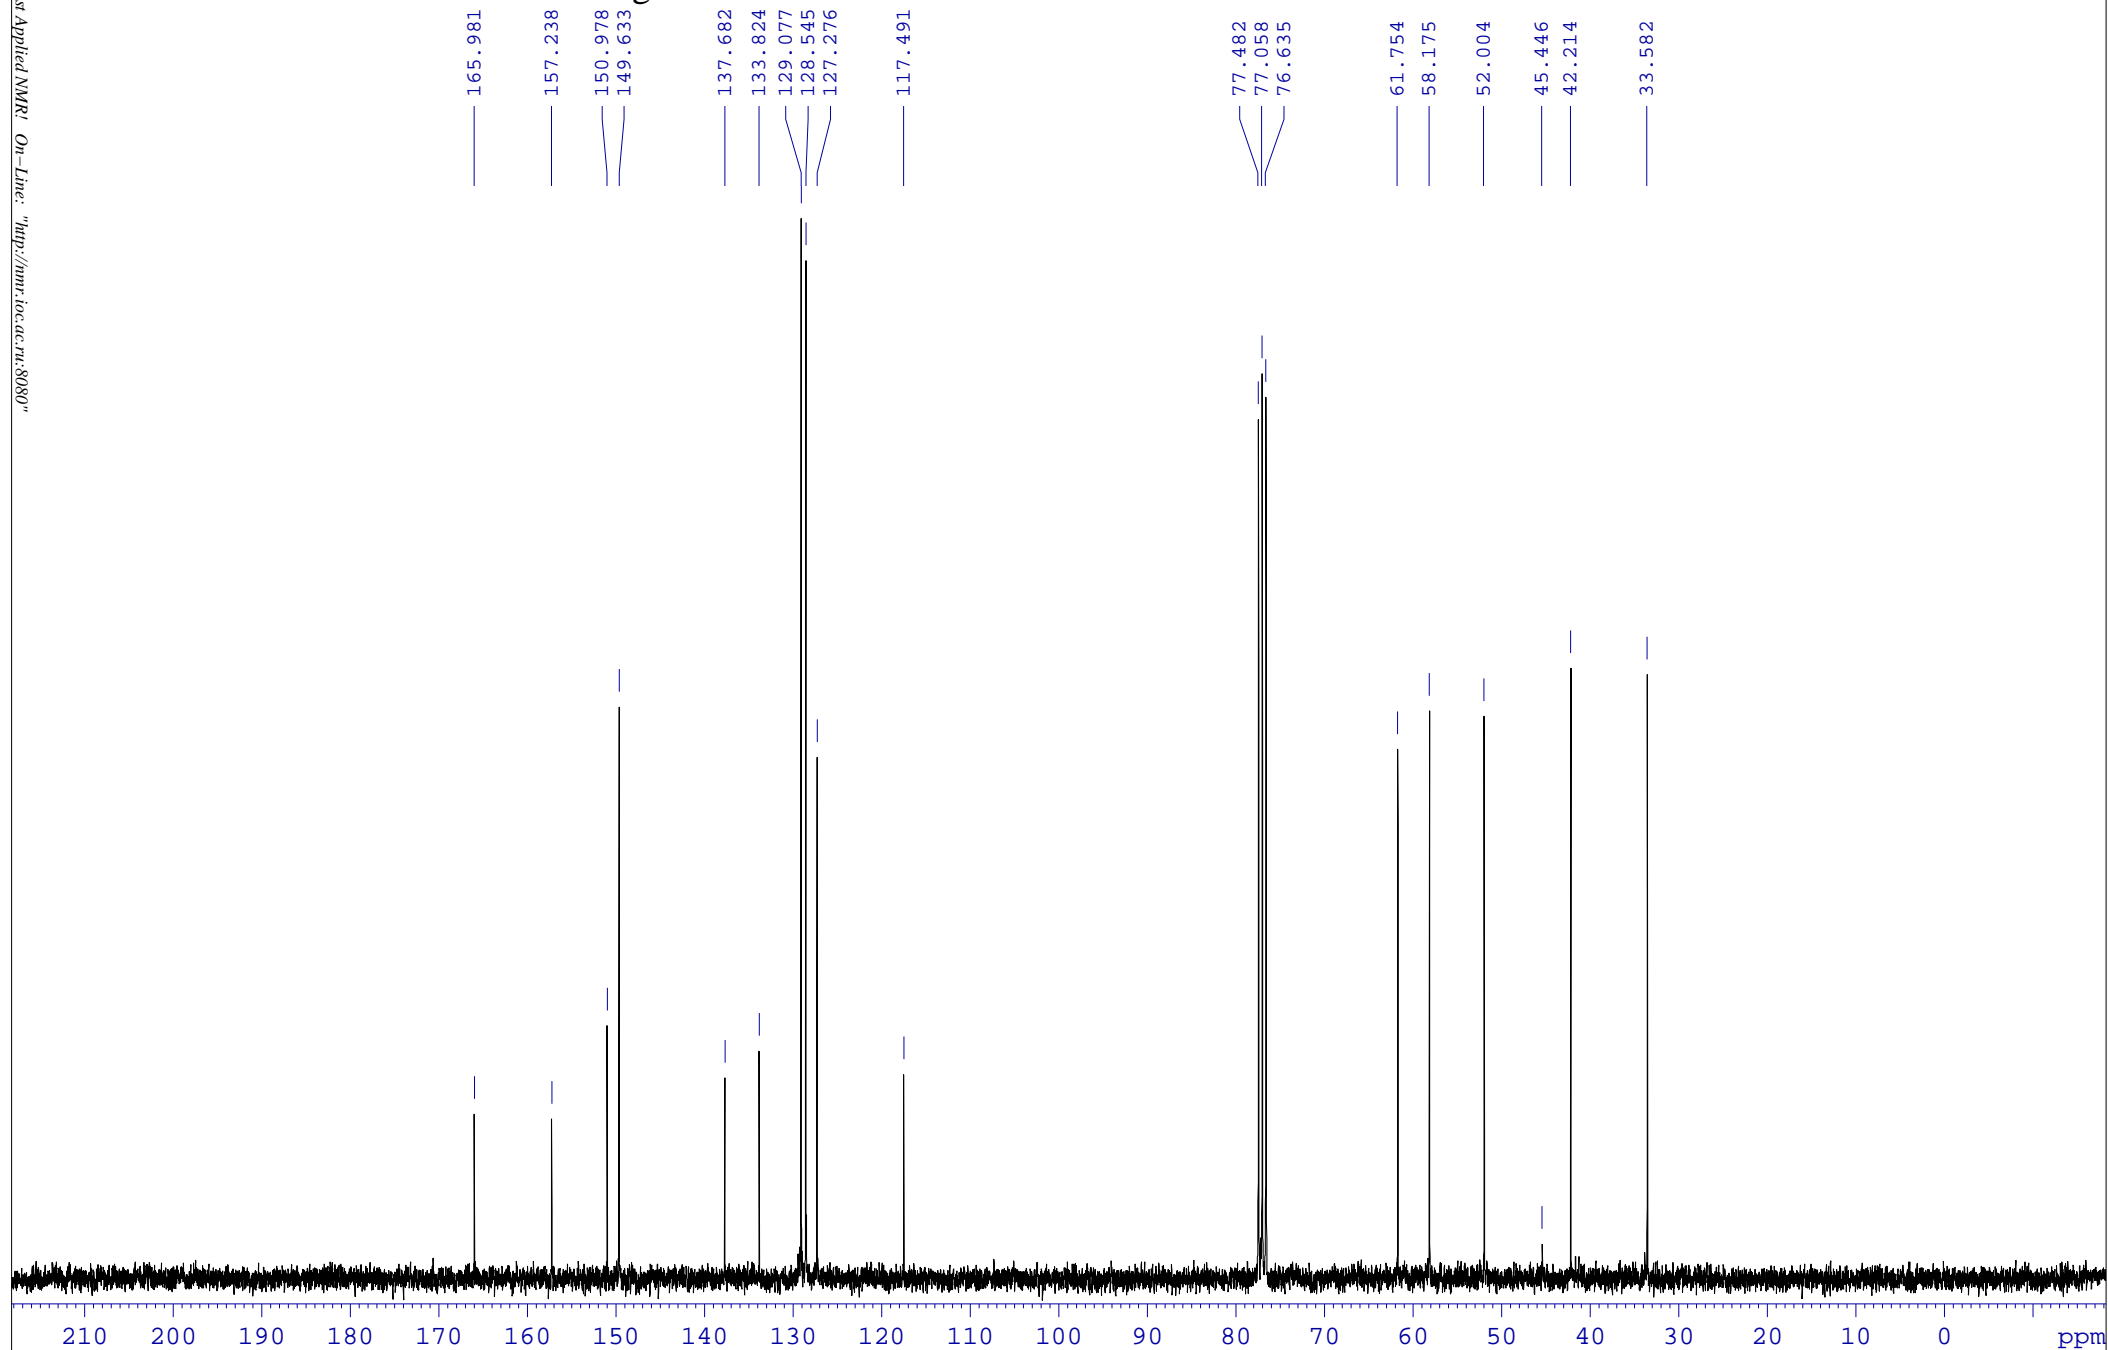

# Display Report

## Analysis Info

Analysis Name D:\Data\Kolotyrkina\2021\Bastrakov\0210030.d  
Method tune\_50-1600.m  
Sample Name /LPIK AF-388  
Comment C17H18N2O2S mH 315.0061 calibrant added CH3CN

Acquisition Date 10.02.2021 21:06:14

Operator BDAL@DE  
Instrument / Ser# micrOTOF 10248

## Acquisition Parameter

|             |            |                      |          |                  |           |
|-------------|------------|----------------------|----------|------------------|-----------|
| Source Type | ESI        | Ion Polarity         | Positive | Set Nebulizer    | 1.0 Bar   |
| Focus       | Not active |                      |          | Set Dry Heater   | 200 °C    |
| Scan Begin  | 50 m/z     | Set Capillary        | 4500 V   | Set Dry Gas      | 4.0 l/min |
| Scan End    | 1600 m/z   | Set End Plate Offset | -500 V   | Set Divert Valve | Waste     |

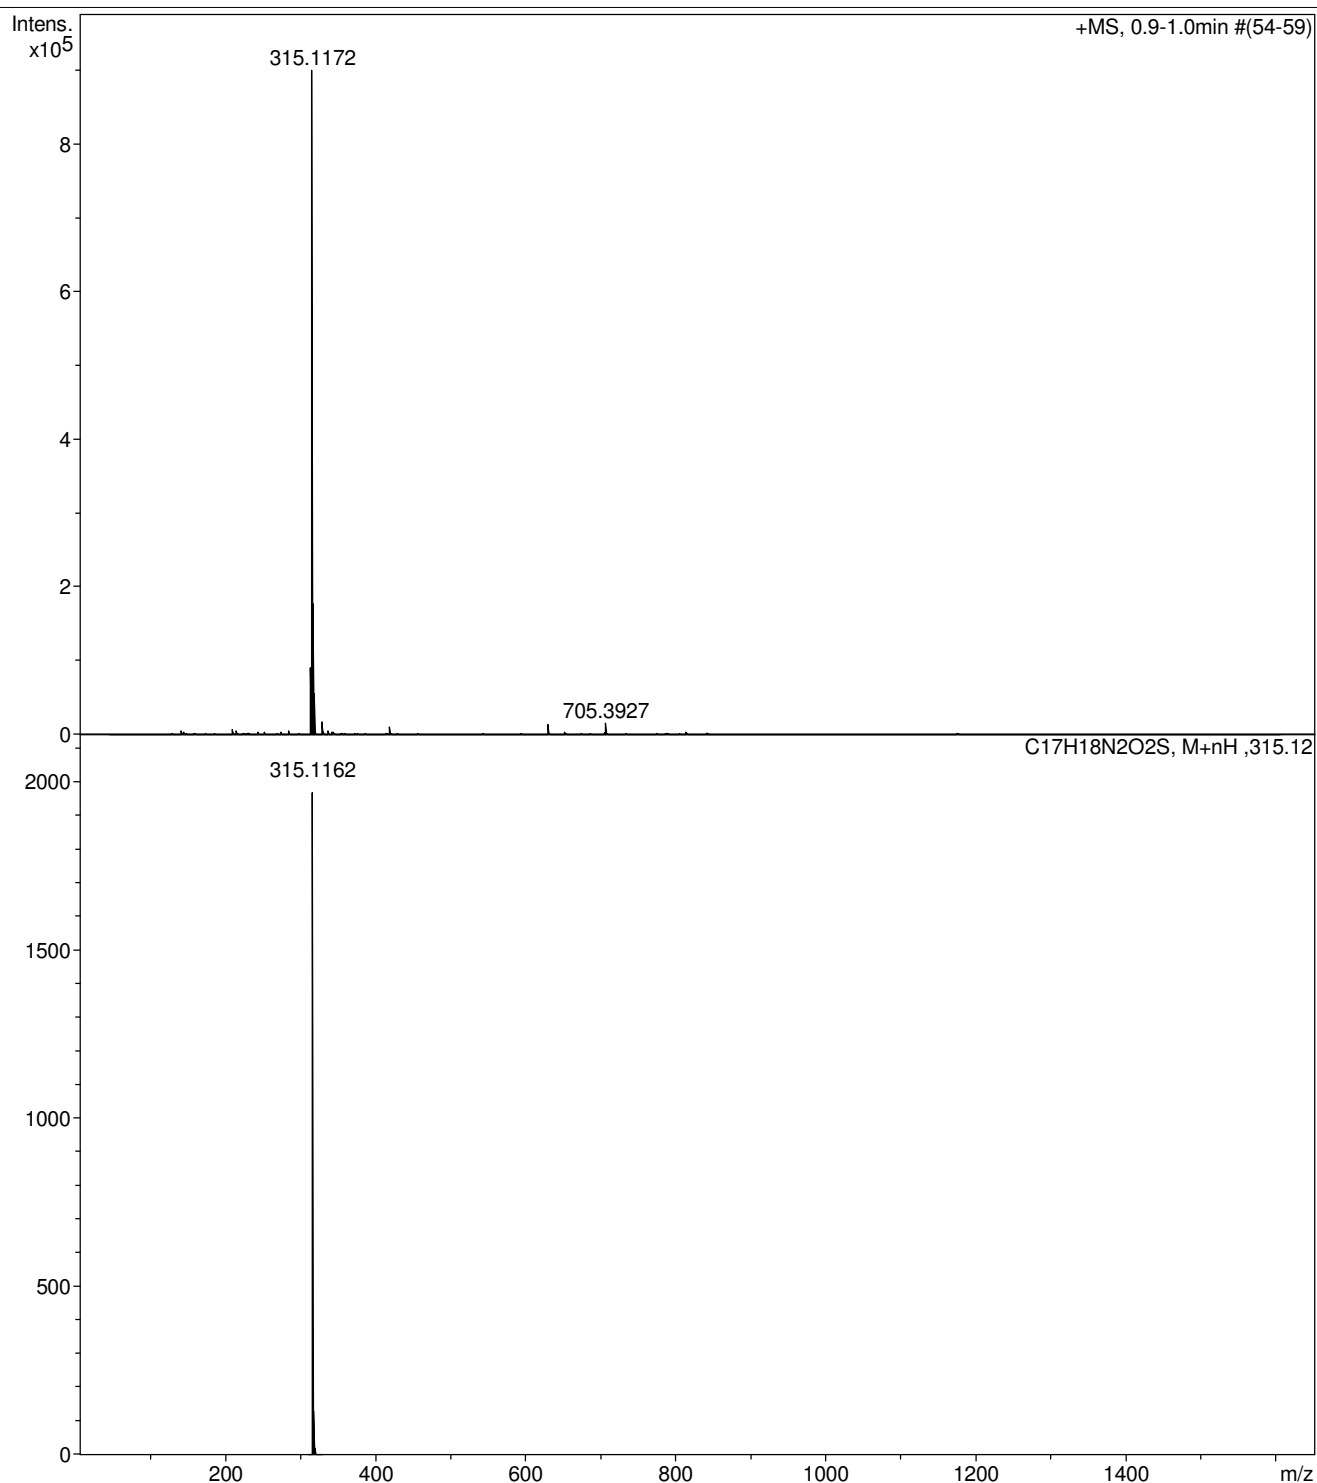





# /LPIK AF-402.2 Kokorekin-20259

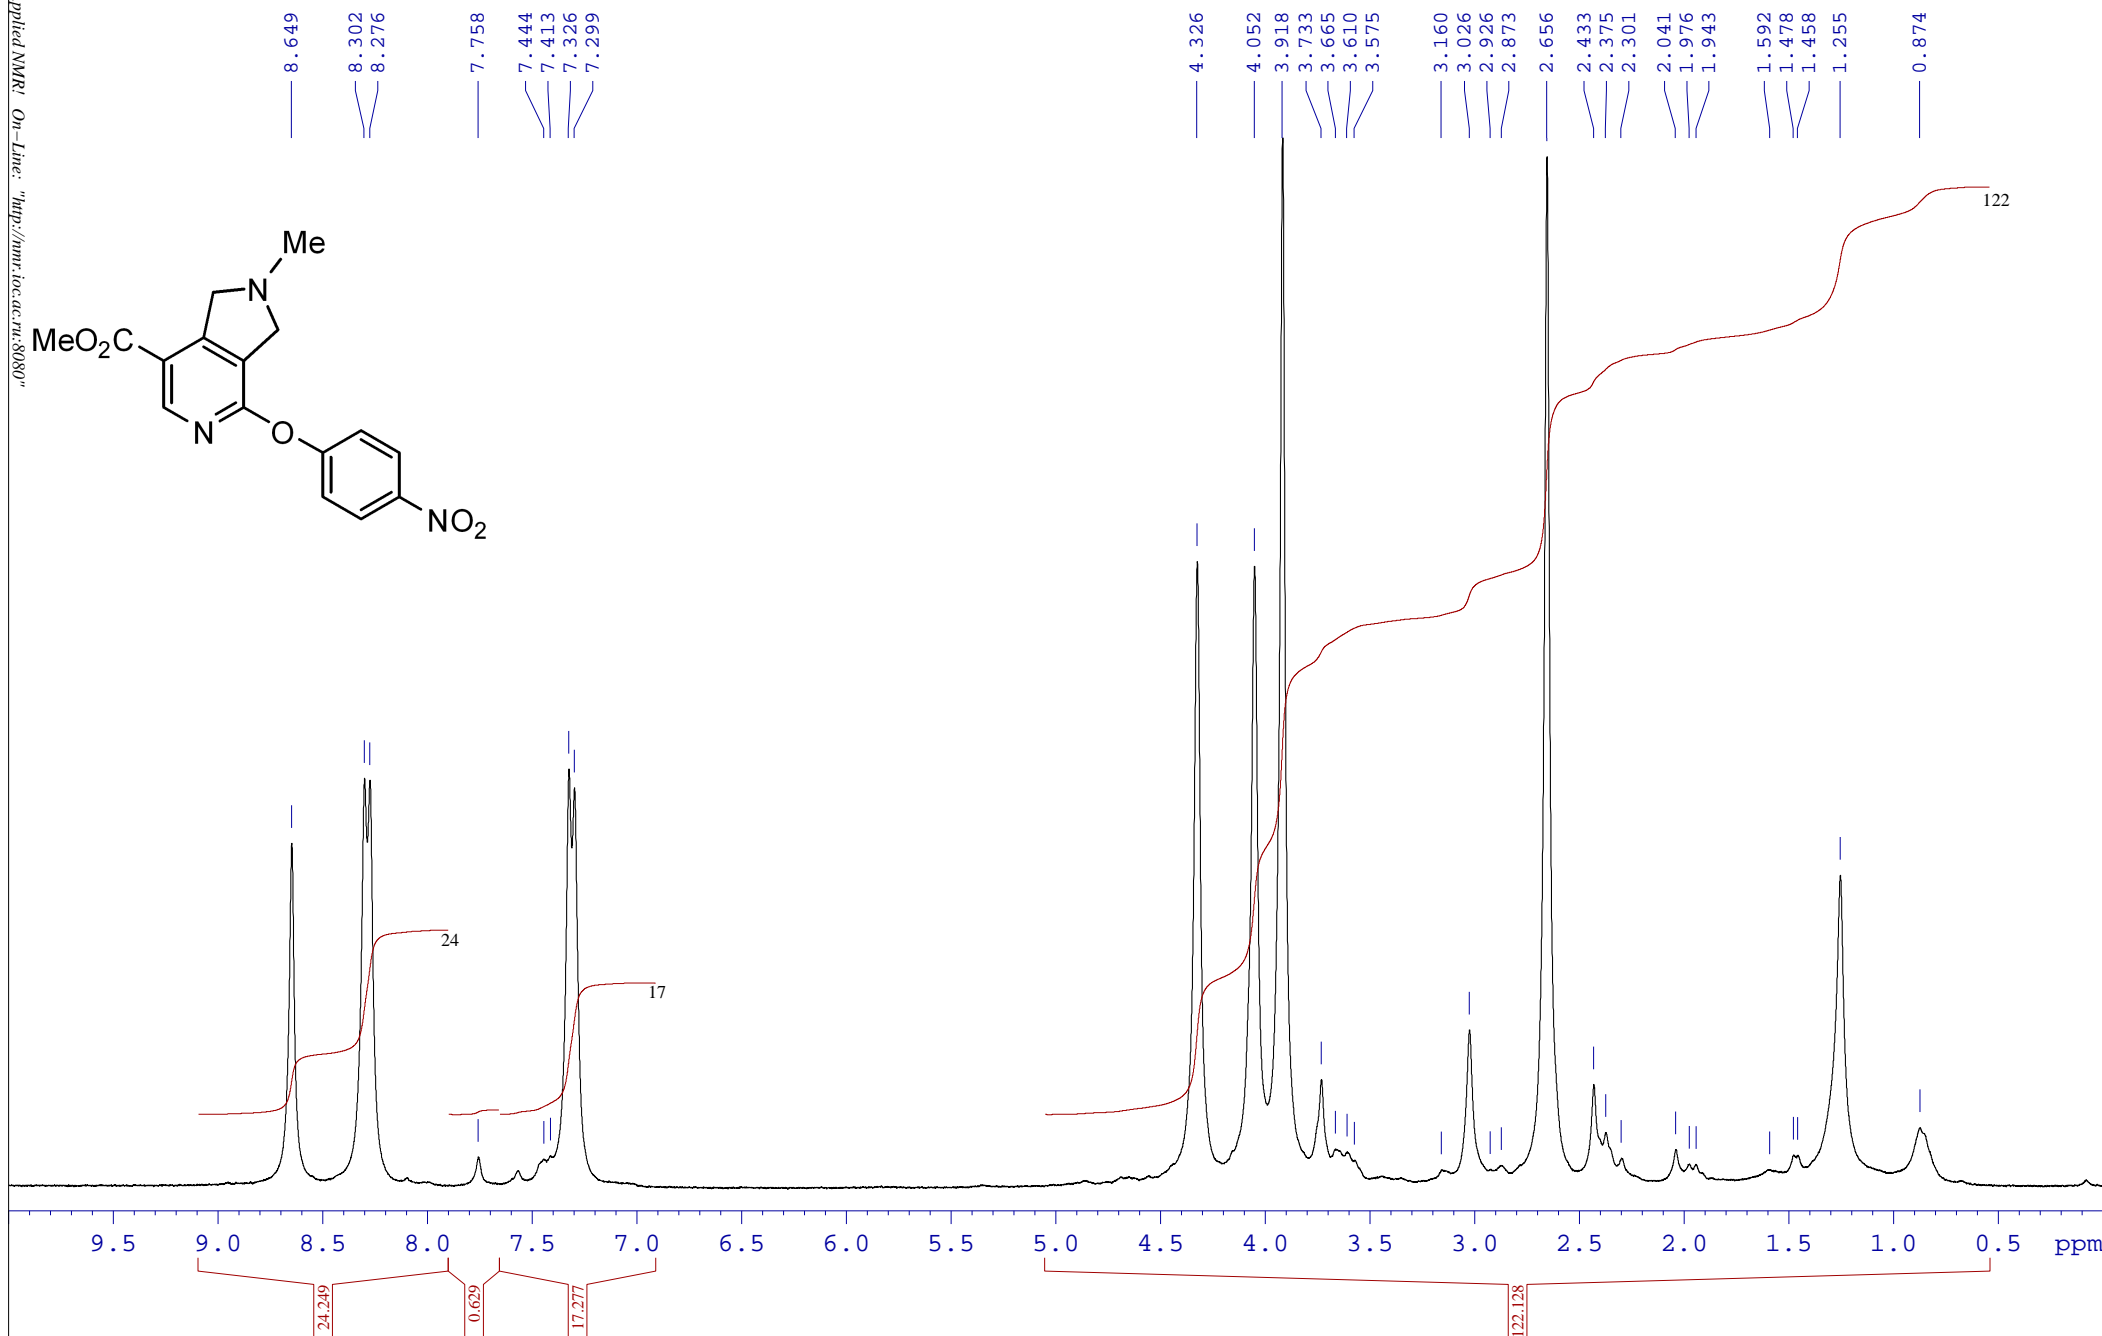



# /LPIK AF-402.2.13 Kokorekin-20259

165.087  
159.179  
158.278  
156.934  
149.152  
144.579  
125.464  
124.531  
121.624  
118.448  
77.483  
77.060  
76.636  
61.911  
57.037  
52.153  
42.092  
29.693

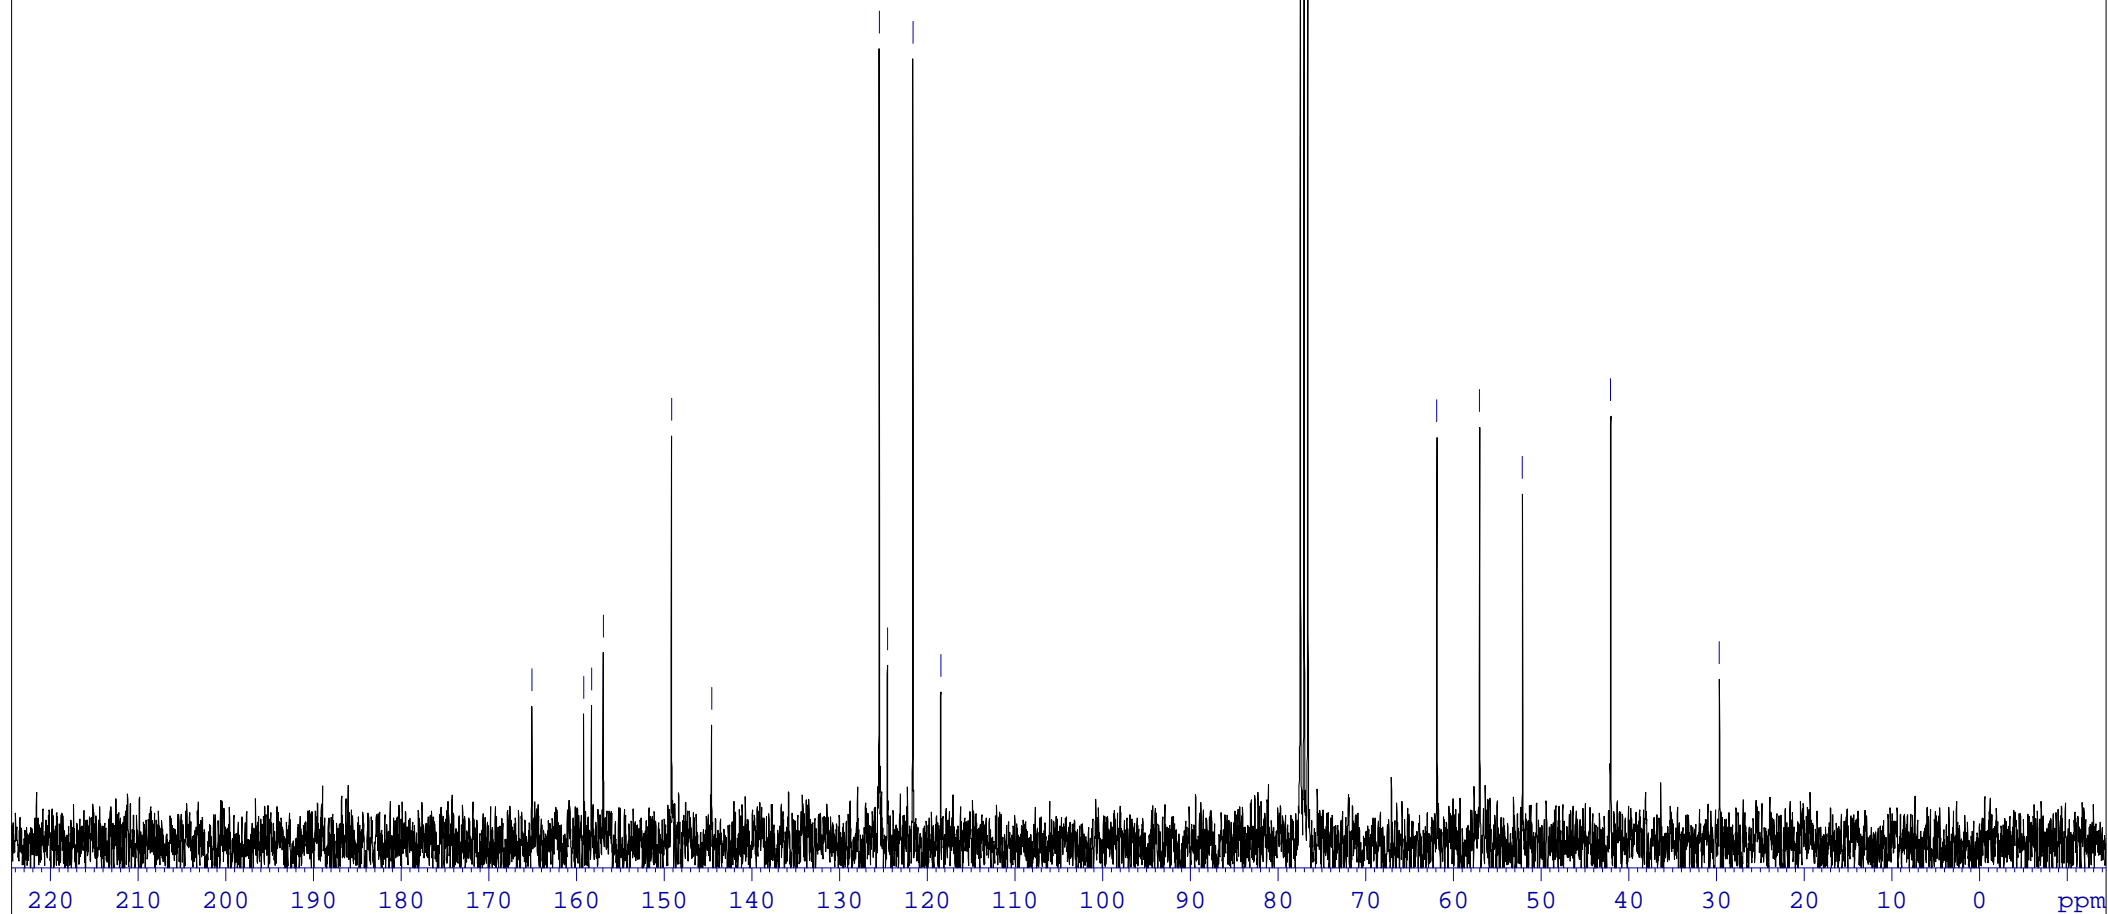

# Display Report

## Analysis Info

Analysis Name D:\Data\Kolotyrkina\2021\Bastrakov\0428029.d  
Method tune\_50-1600.m  
Sample Name /LPIK AF-402  
Comment C16H15N3O5 mH 330.1084 clb added CH3OH

Acquisition Date 28.04.2021 13:21:03

Operator BDAL@DE  
Instrument / Ser# micrOTOF 10248

## Acquisition Parameter

|             |            |                      |          |                  |           |
|-------------|------------|----------------------|----------|------------------|-----------|
| Source Type | ESI        | Ion Polarity         | Positive | Set Nebulizer    | 1.0 Bar   |
| Focus       | Not active |                      |          | Set Dry Heater   | 200 °C    |
| Scan Begin  | 50 m/z     | Set Capillary        | 4500 V   | Set Dry Gas      | 4.0 l/min |
| Scan End    | 1600 m/z   | Set End Plate Offset | -500 V   | Set Divert Valve | Waste     |

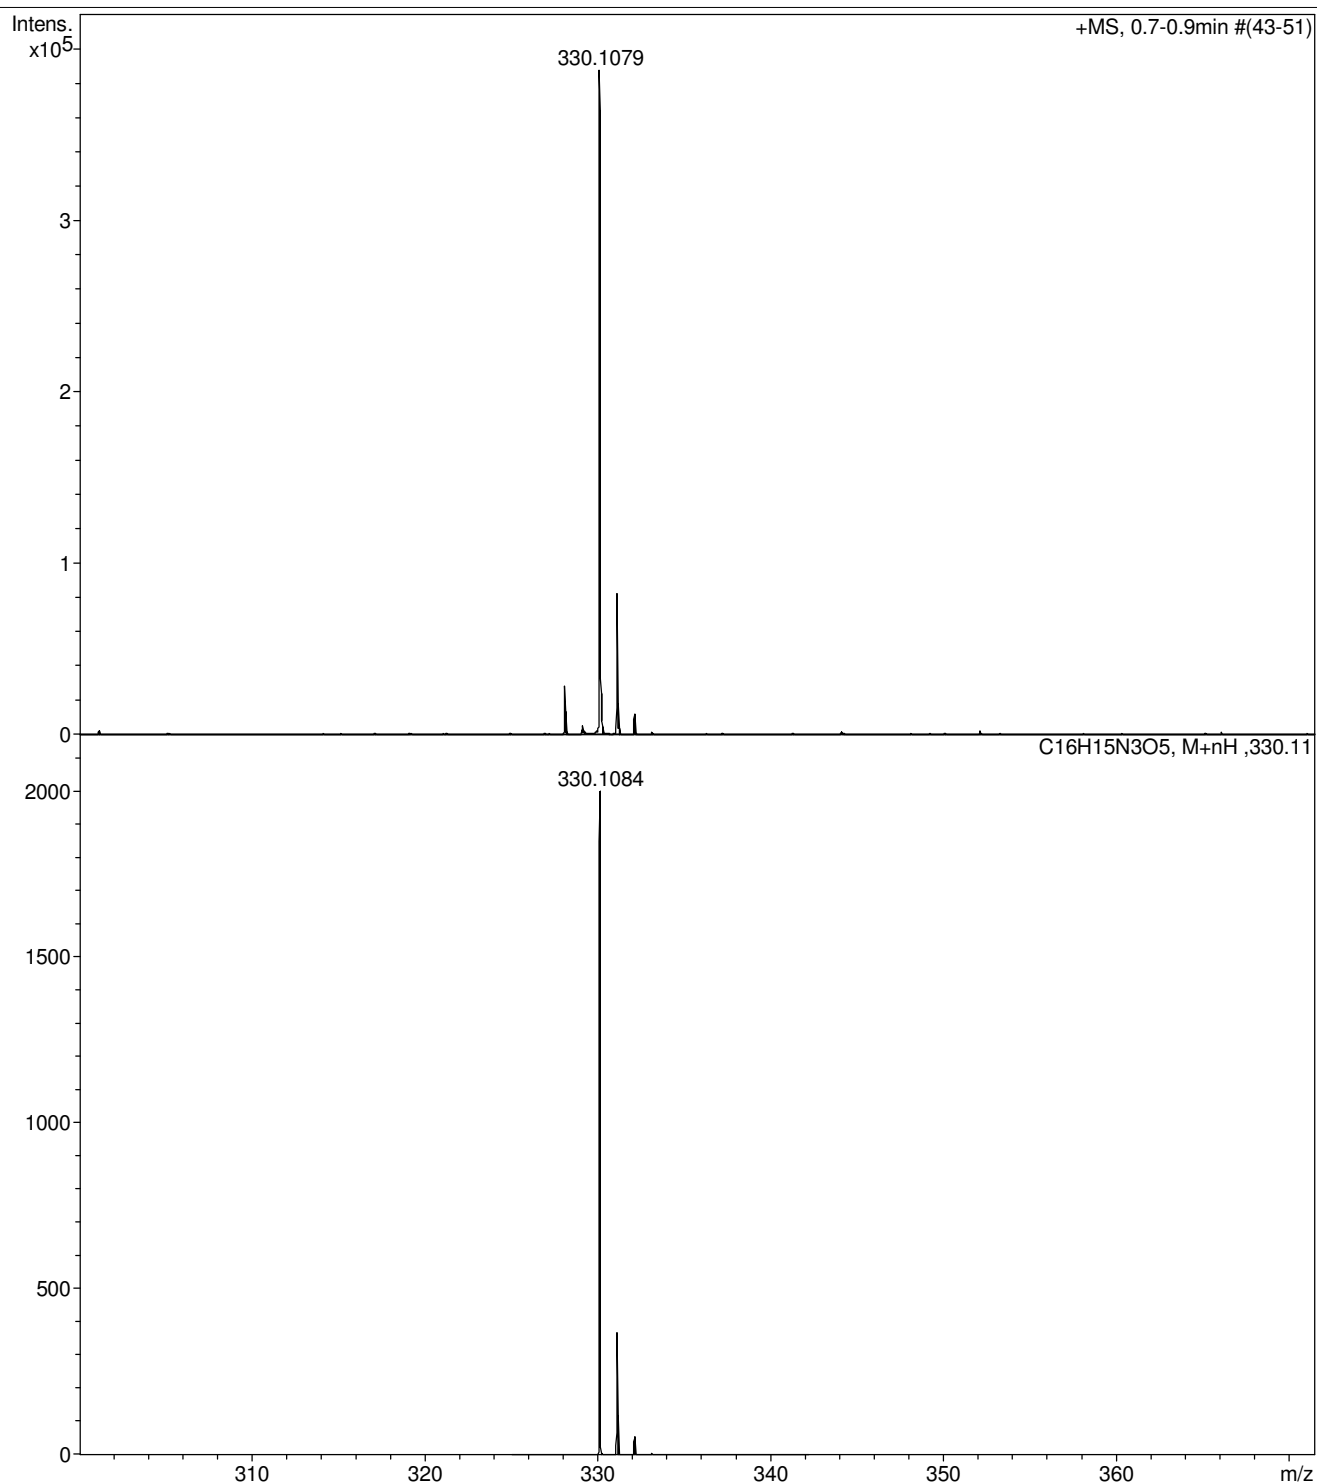



/LPIK AF-393.2

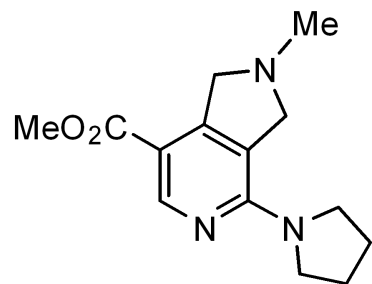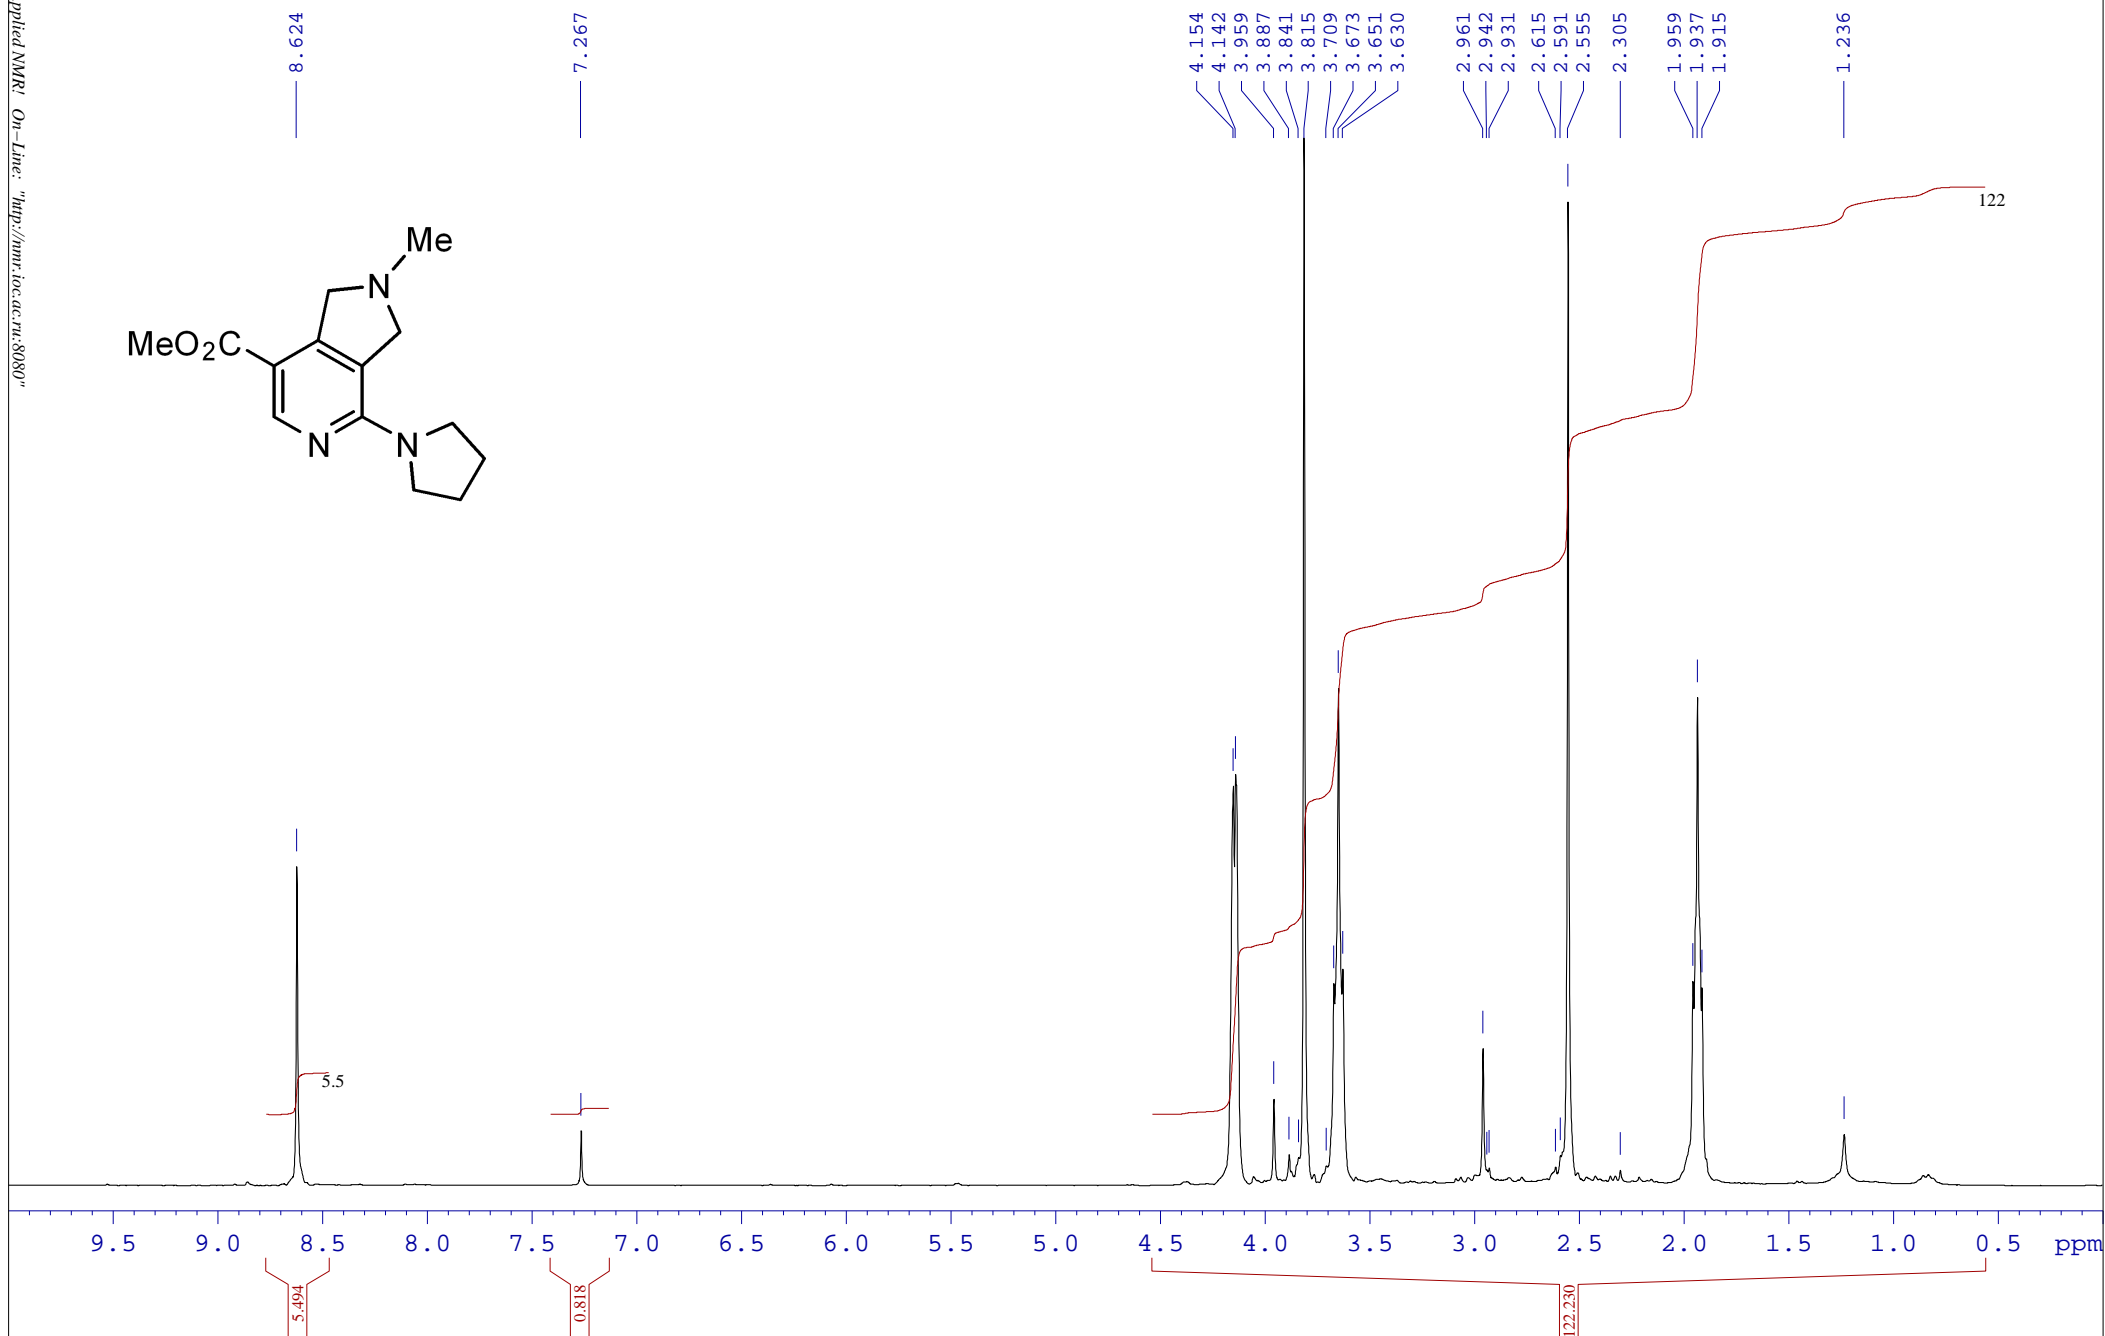



/LPIK AF-393.2.C13

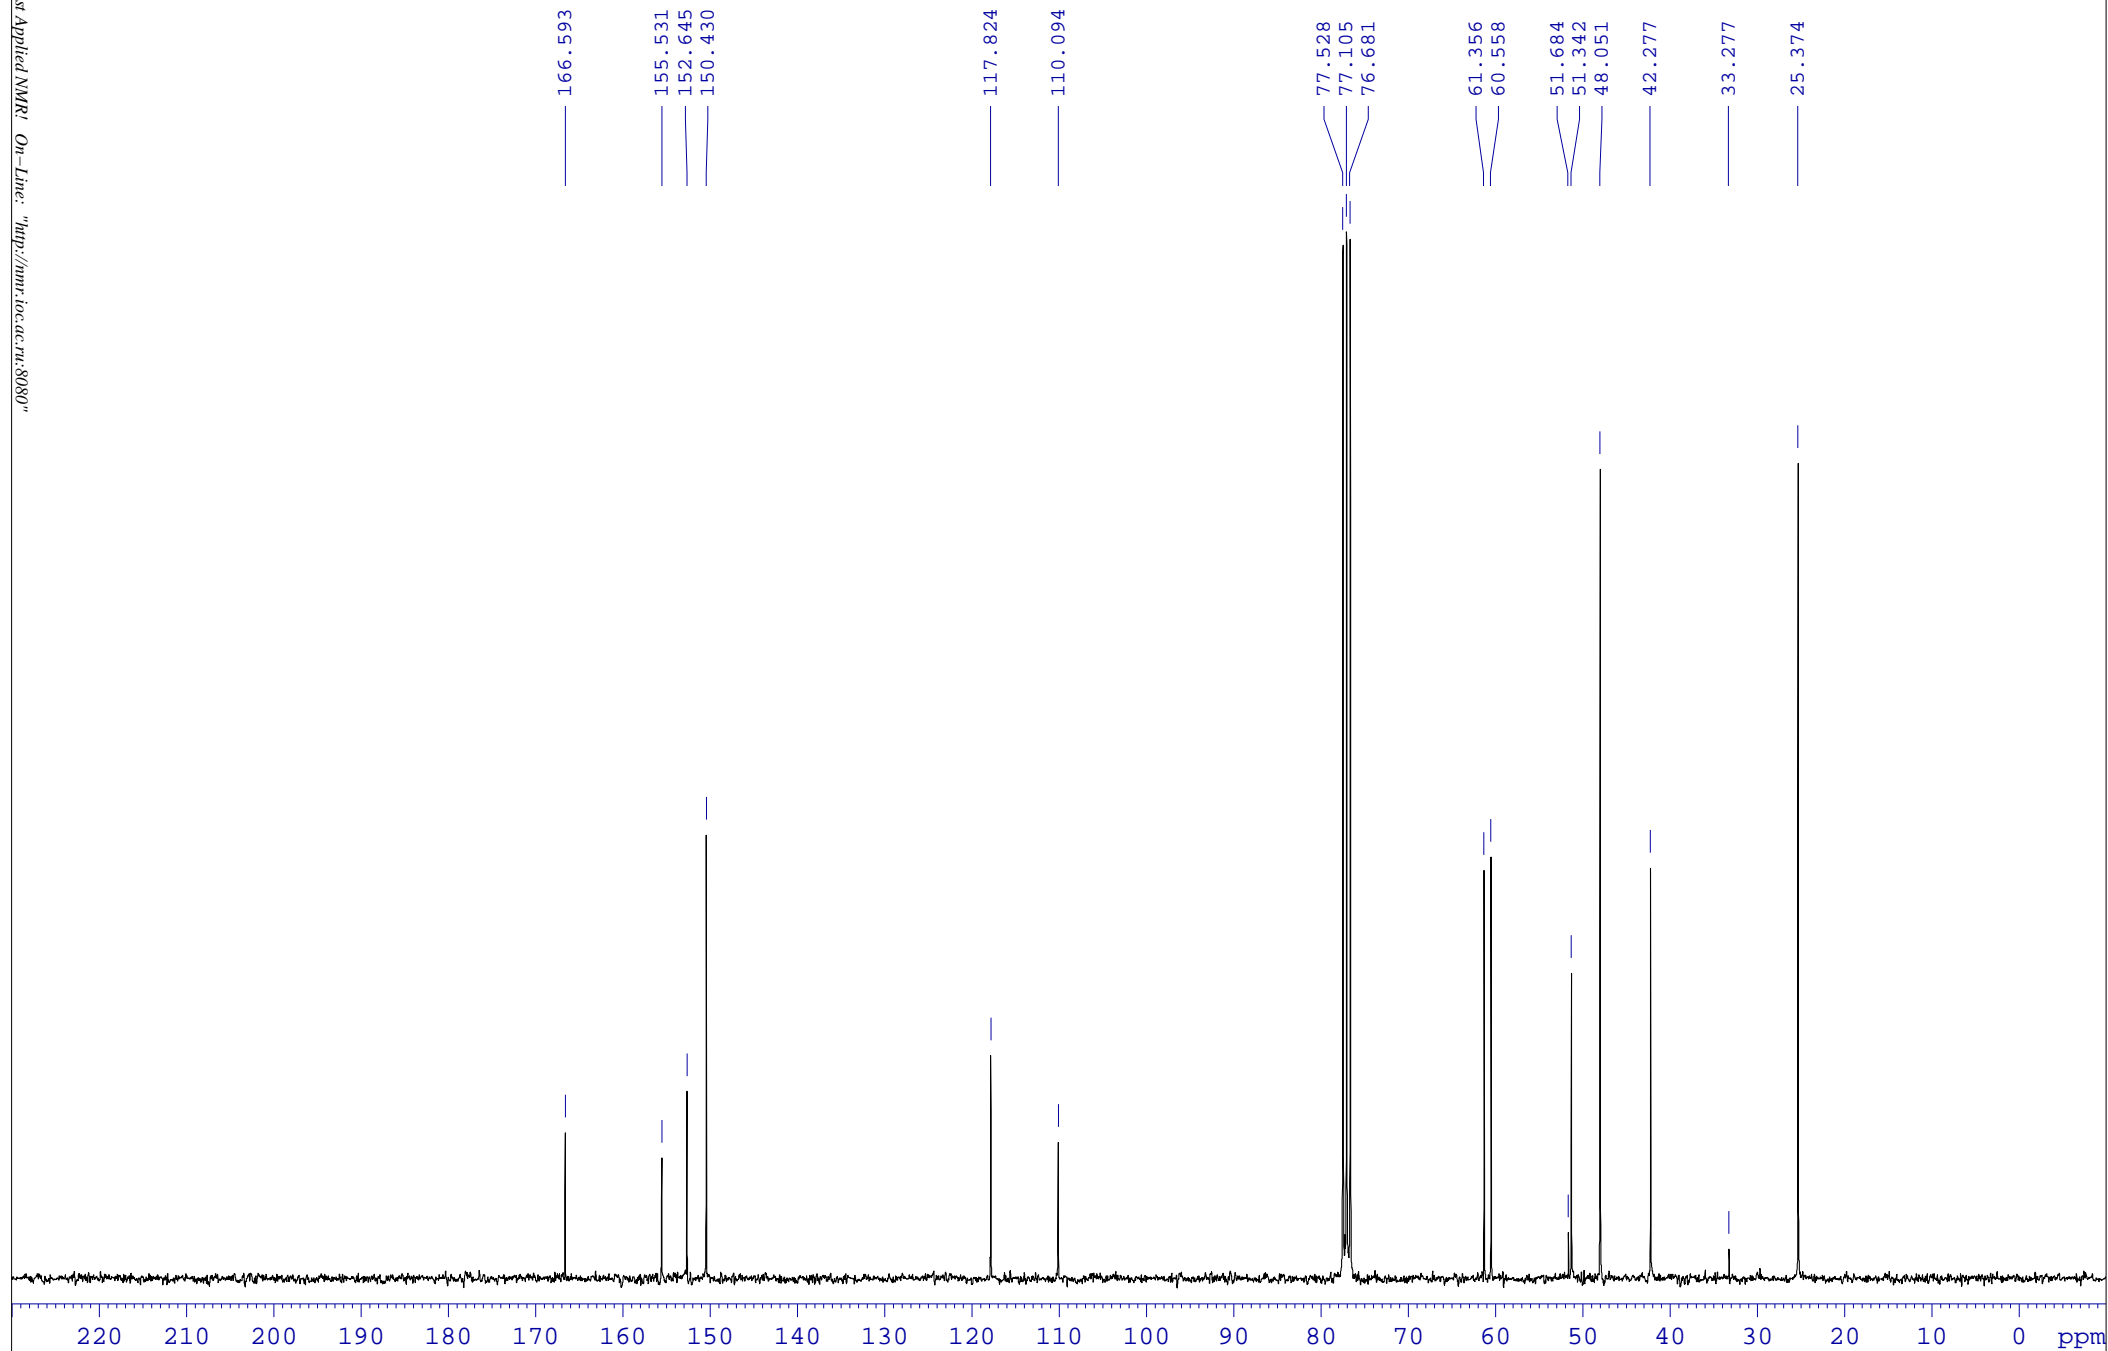

# Display Report

## Analysis Info

Analysis Name D:\Data\Kolotyrkina\2021\Bastrakov\0211021.d  
Method tune\_50-1600.m  
Sample Name /LPIK AF-393.2  
Comment C14H19N3O2 mH 262.1550alibrant added CH3OH

Acquisition Date 11.02.2021 12:48:04

Operator BDAL@DE  
Instrument / Ser# micrOTOF 10248

## Acquisition Parameter

|             |            |                      |          |                  |           |
|-------------|------------|----------------------|----------|------------------|-----------|
| Source Type | ESI        | Ion Polarity         | Positive | Set Nebulizer    | 1.0 Bar   |
| Focus       | Not active |                      |          | Set Dry Heater   | 200 °C    |
| Scan Begin  | 50 m/z     | Set Capillary        | 4500 V   | Set Dry Gas      | 4.0 l/min |
| Scan End    | 1600 m/z   | Set End Plate Offset | -500 V   | Set Divert Valve | Waste     |

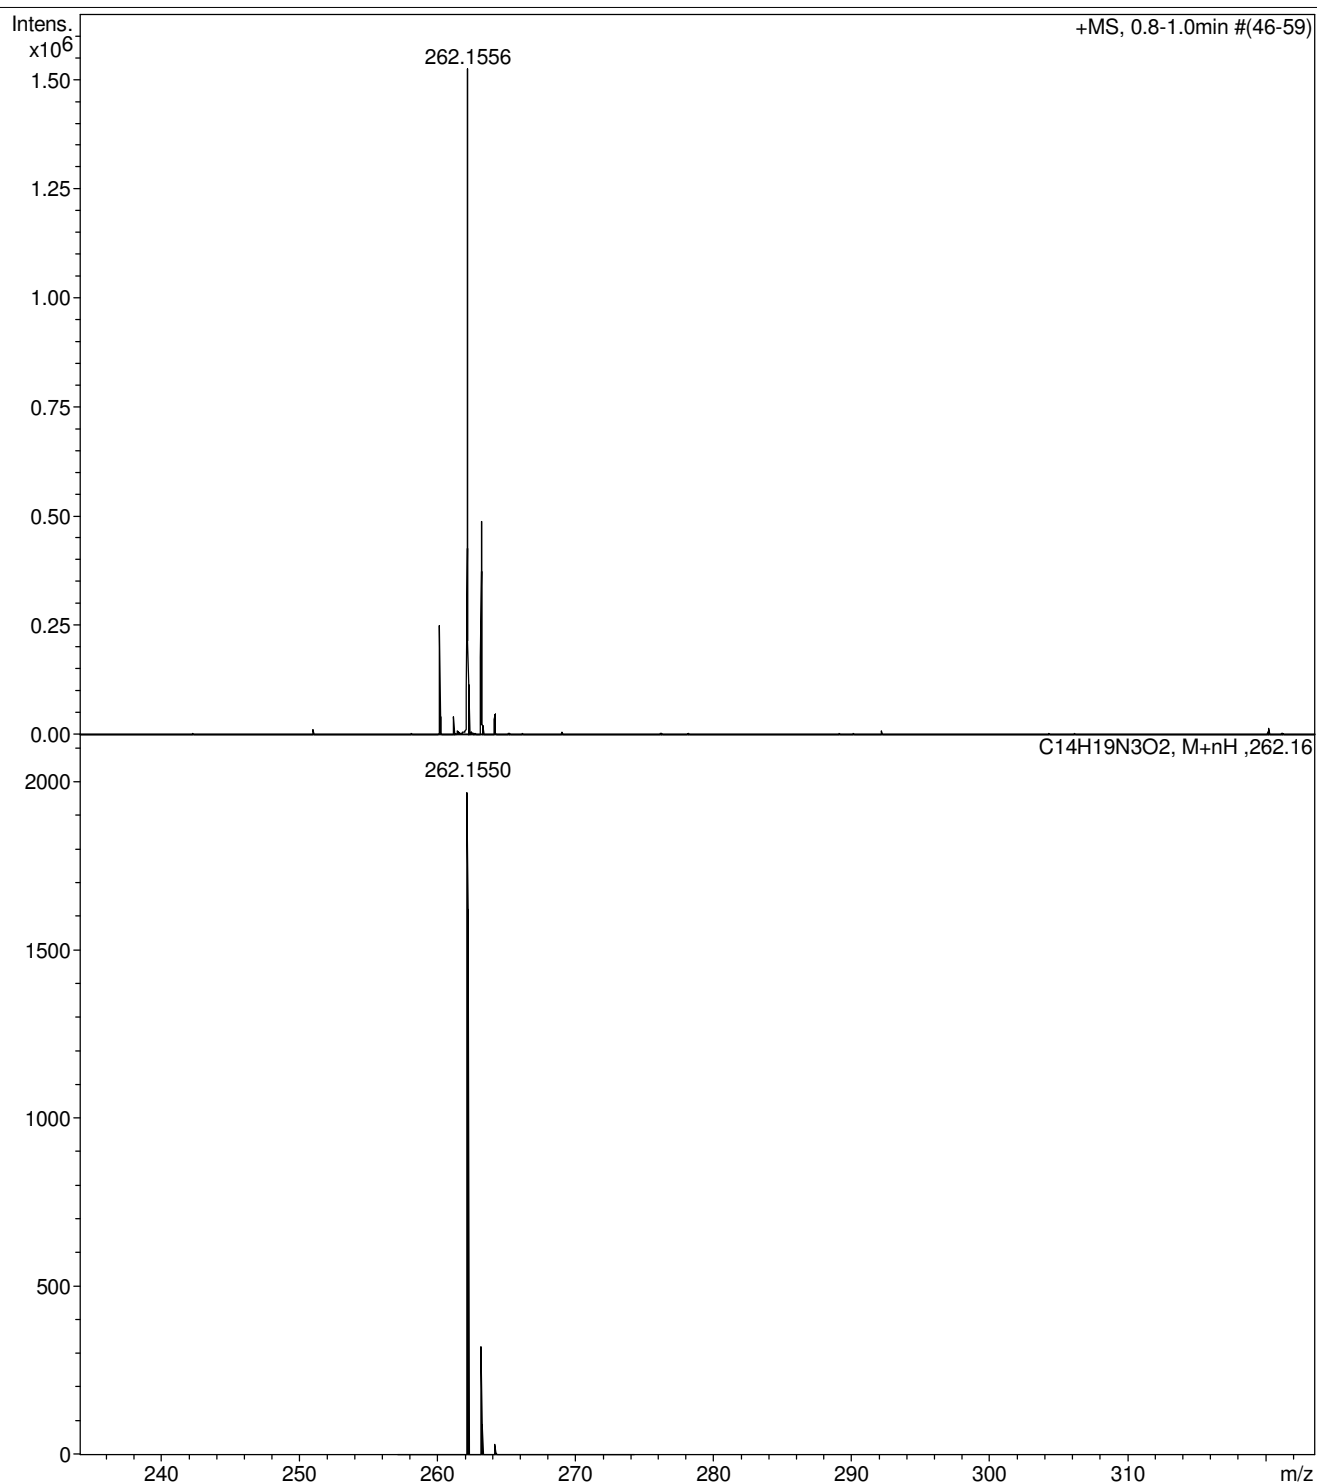



/LPIK AF-400.R

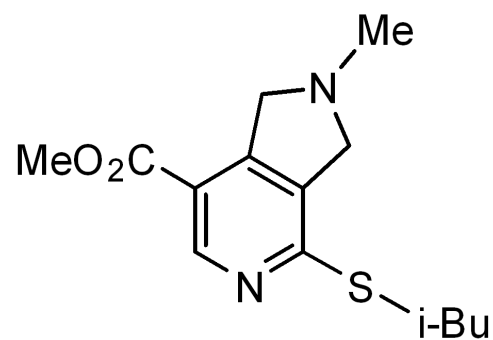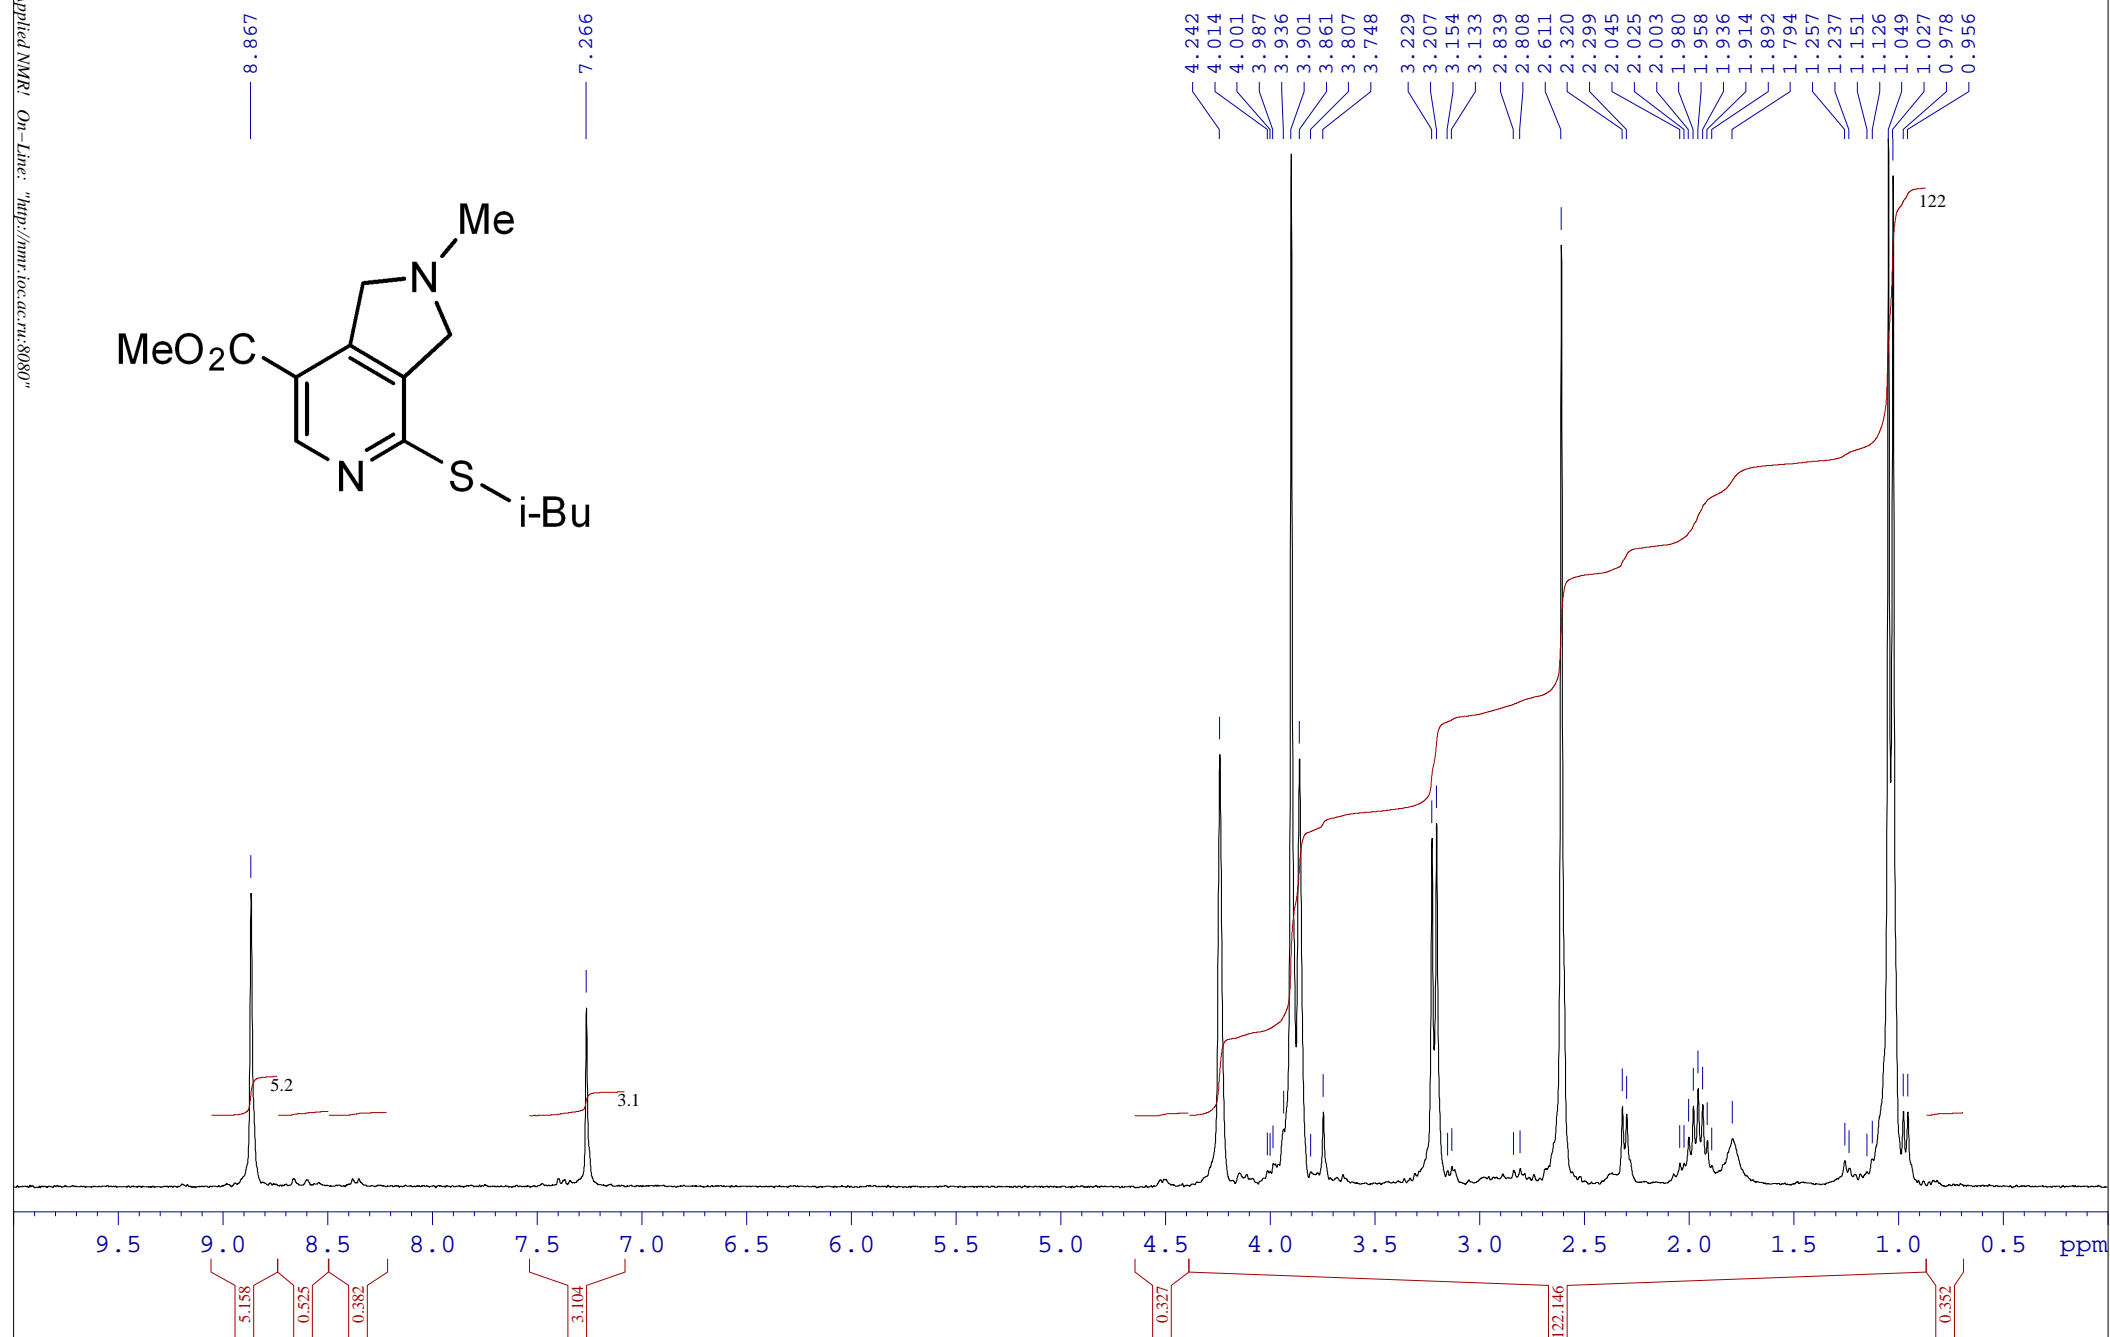



# /LPIK AF-400.1.13 Kokorekin-20259

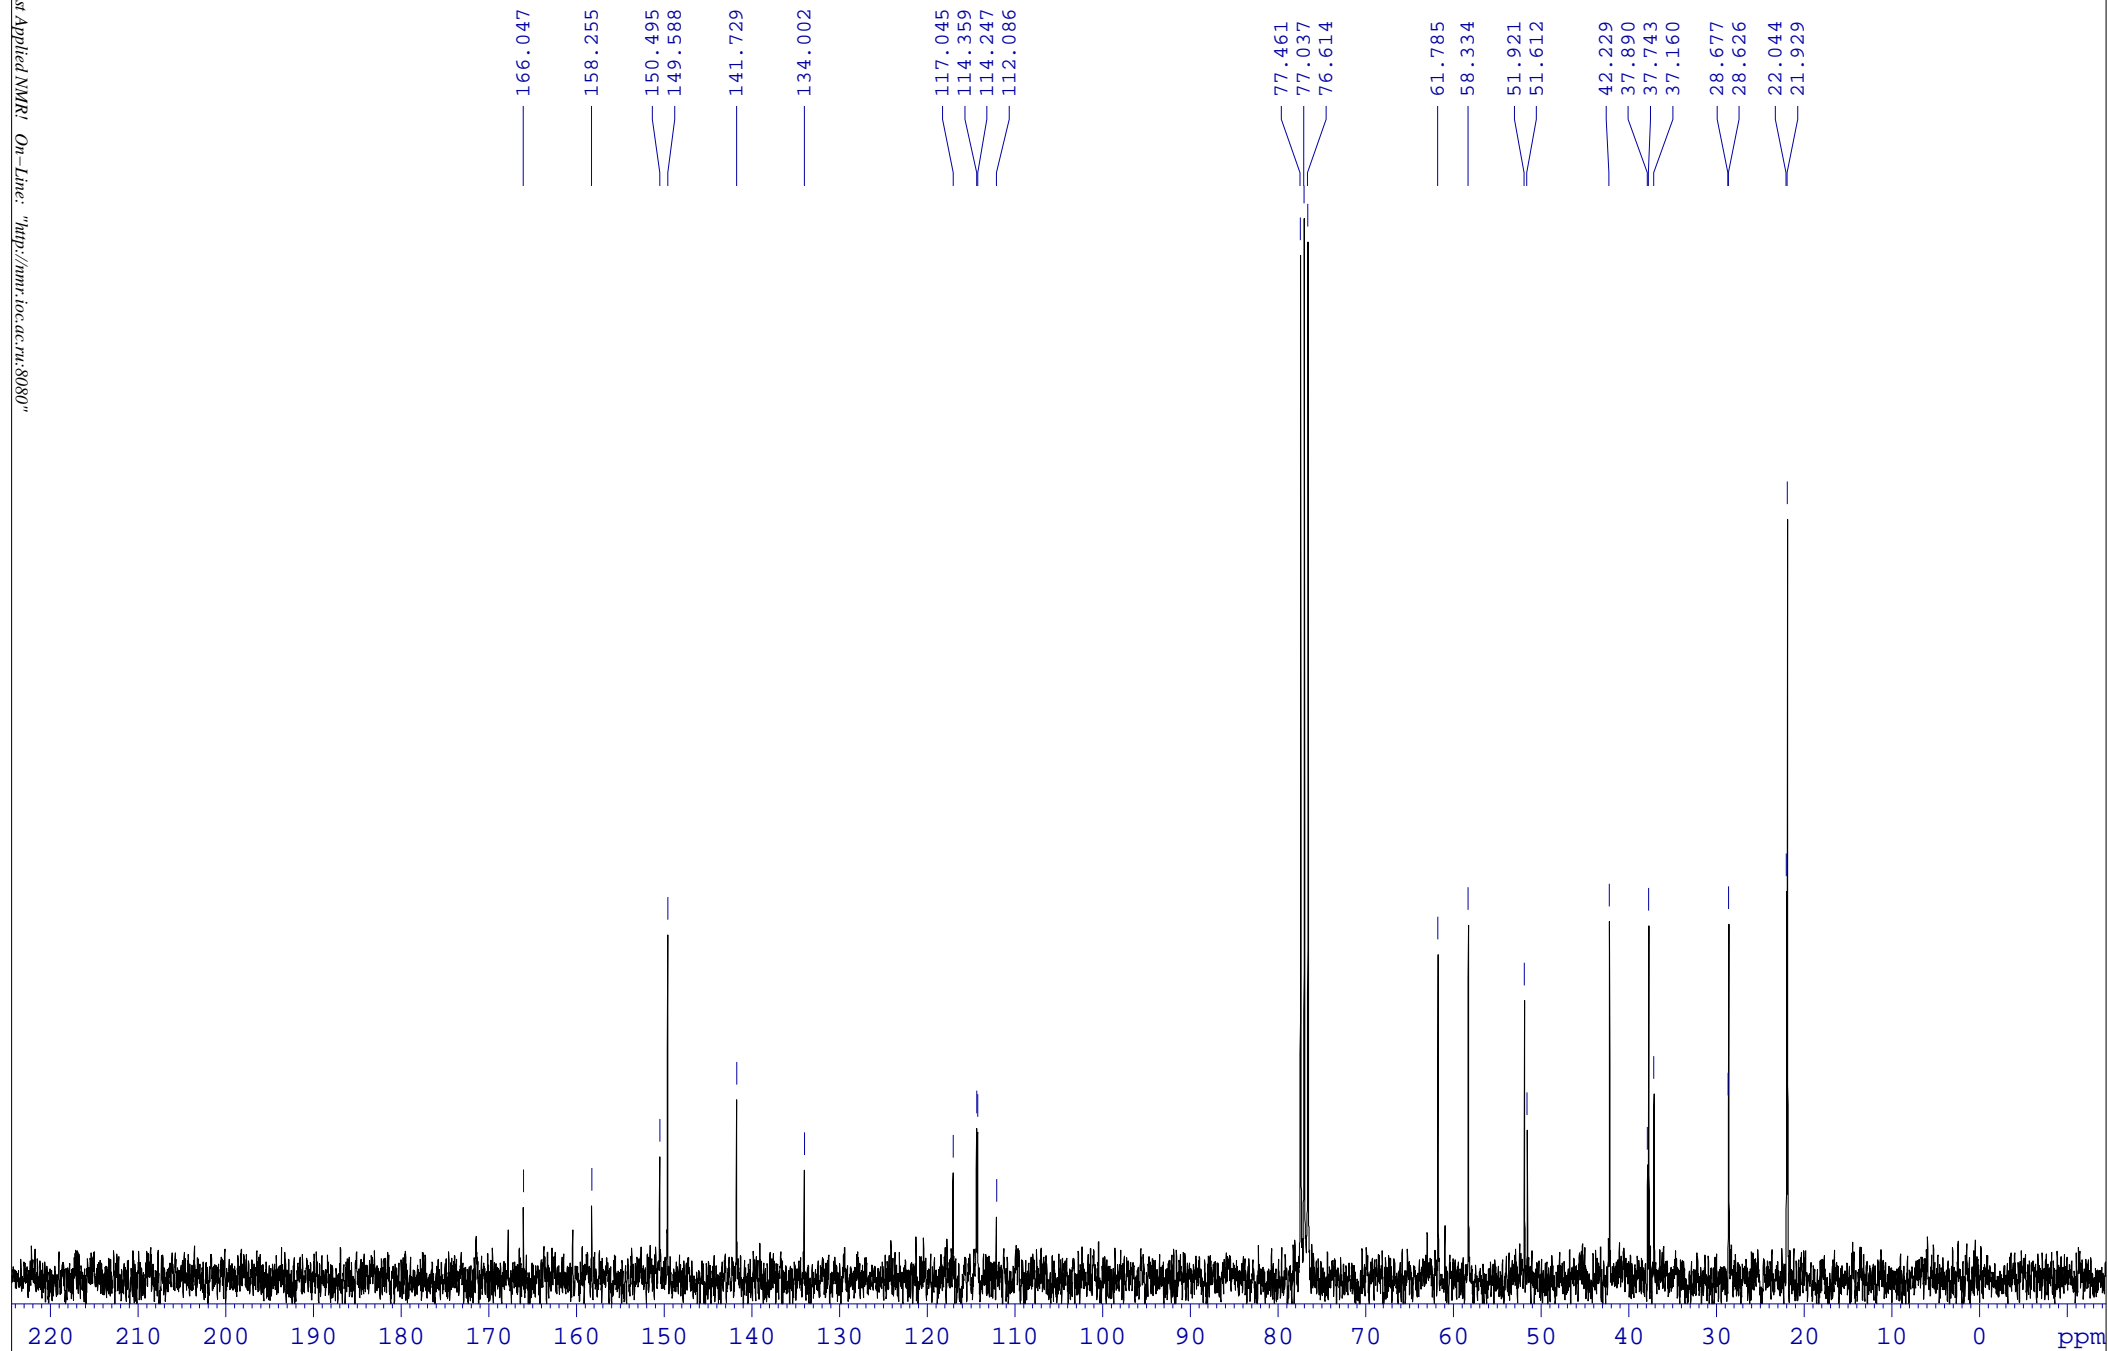



# Display Report

## Analysis Info

Analysis Name D:\Data\Kolotyrkina\2021\Bastrakov\0211023.d  
Method tune\_50-1600.m  
Sample Name /LPIK AF-400  
Comment C14H20N2O2S mH 281.1318 calibrant added CH3OH

Acquisition Date 11.02.2021 13:03:54

Operator BDAL@DE  
Instrument / Ser# micrOTOF 10248

## Acquisition Parameter

|             |            |                      |          |                  |           |
|-------------|------------|----------------------|----------|------------------|-----------|
| Source Type | ESI        | Ion Polarity         | Positive | Set Nebulizer    | 1.0 Bar   |
| Focus       | Not active |                      |          | Set Dry Heater   | 200 °C    |
| Scan Begin  | 50 m/z     | Set Capillary        | 4500 V   | Set Dry Gas      | 4.0 l/min |
| Scan End    | 1600 m/z   | Set End Plate Offset | -500 V   | Set Divert Valve | Waste     |

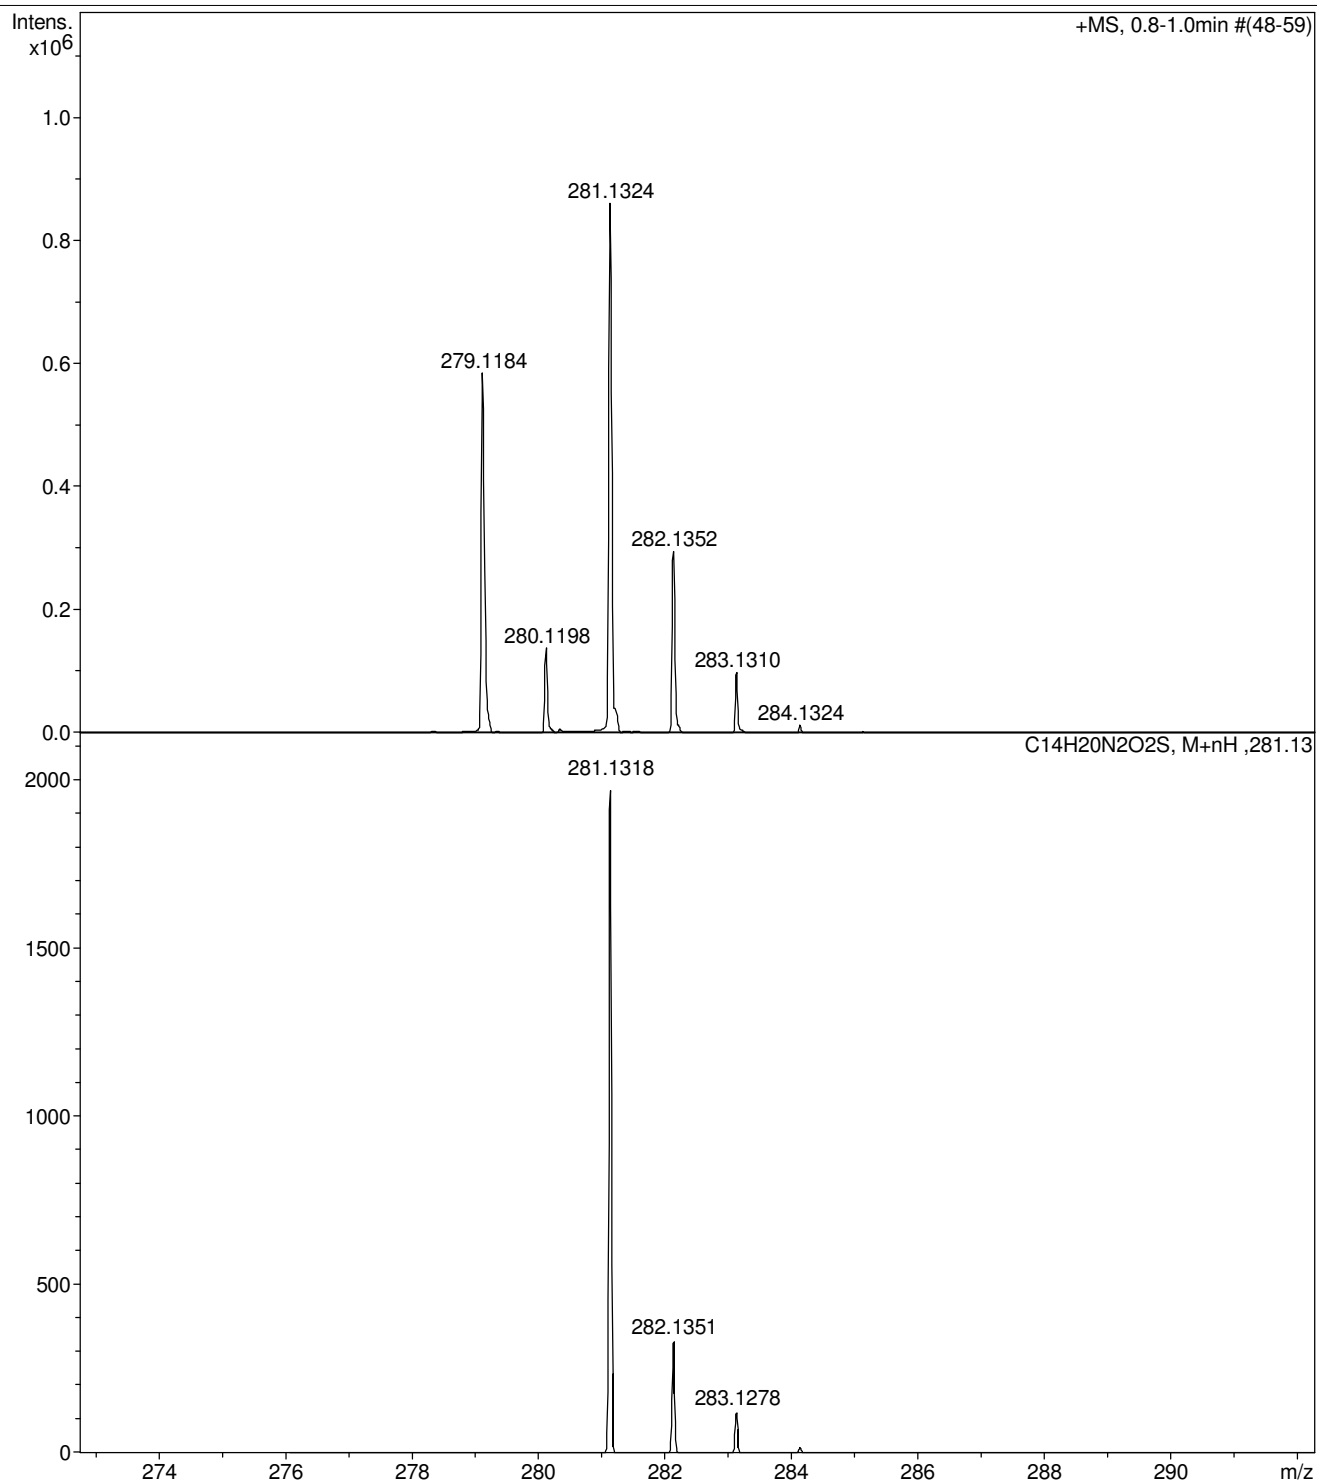



# /LPIK AF-409

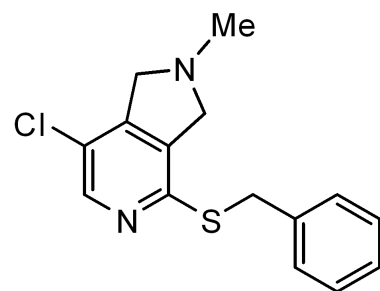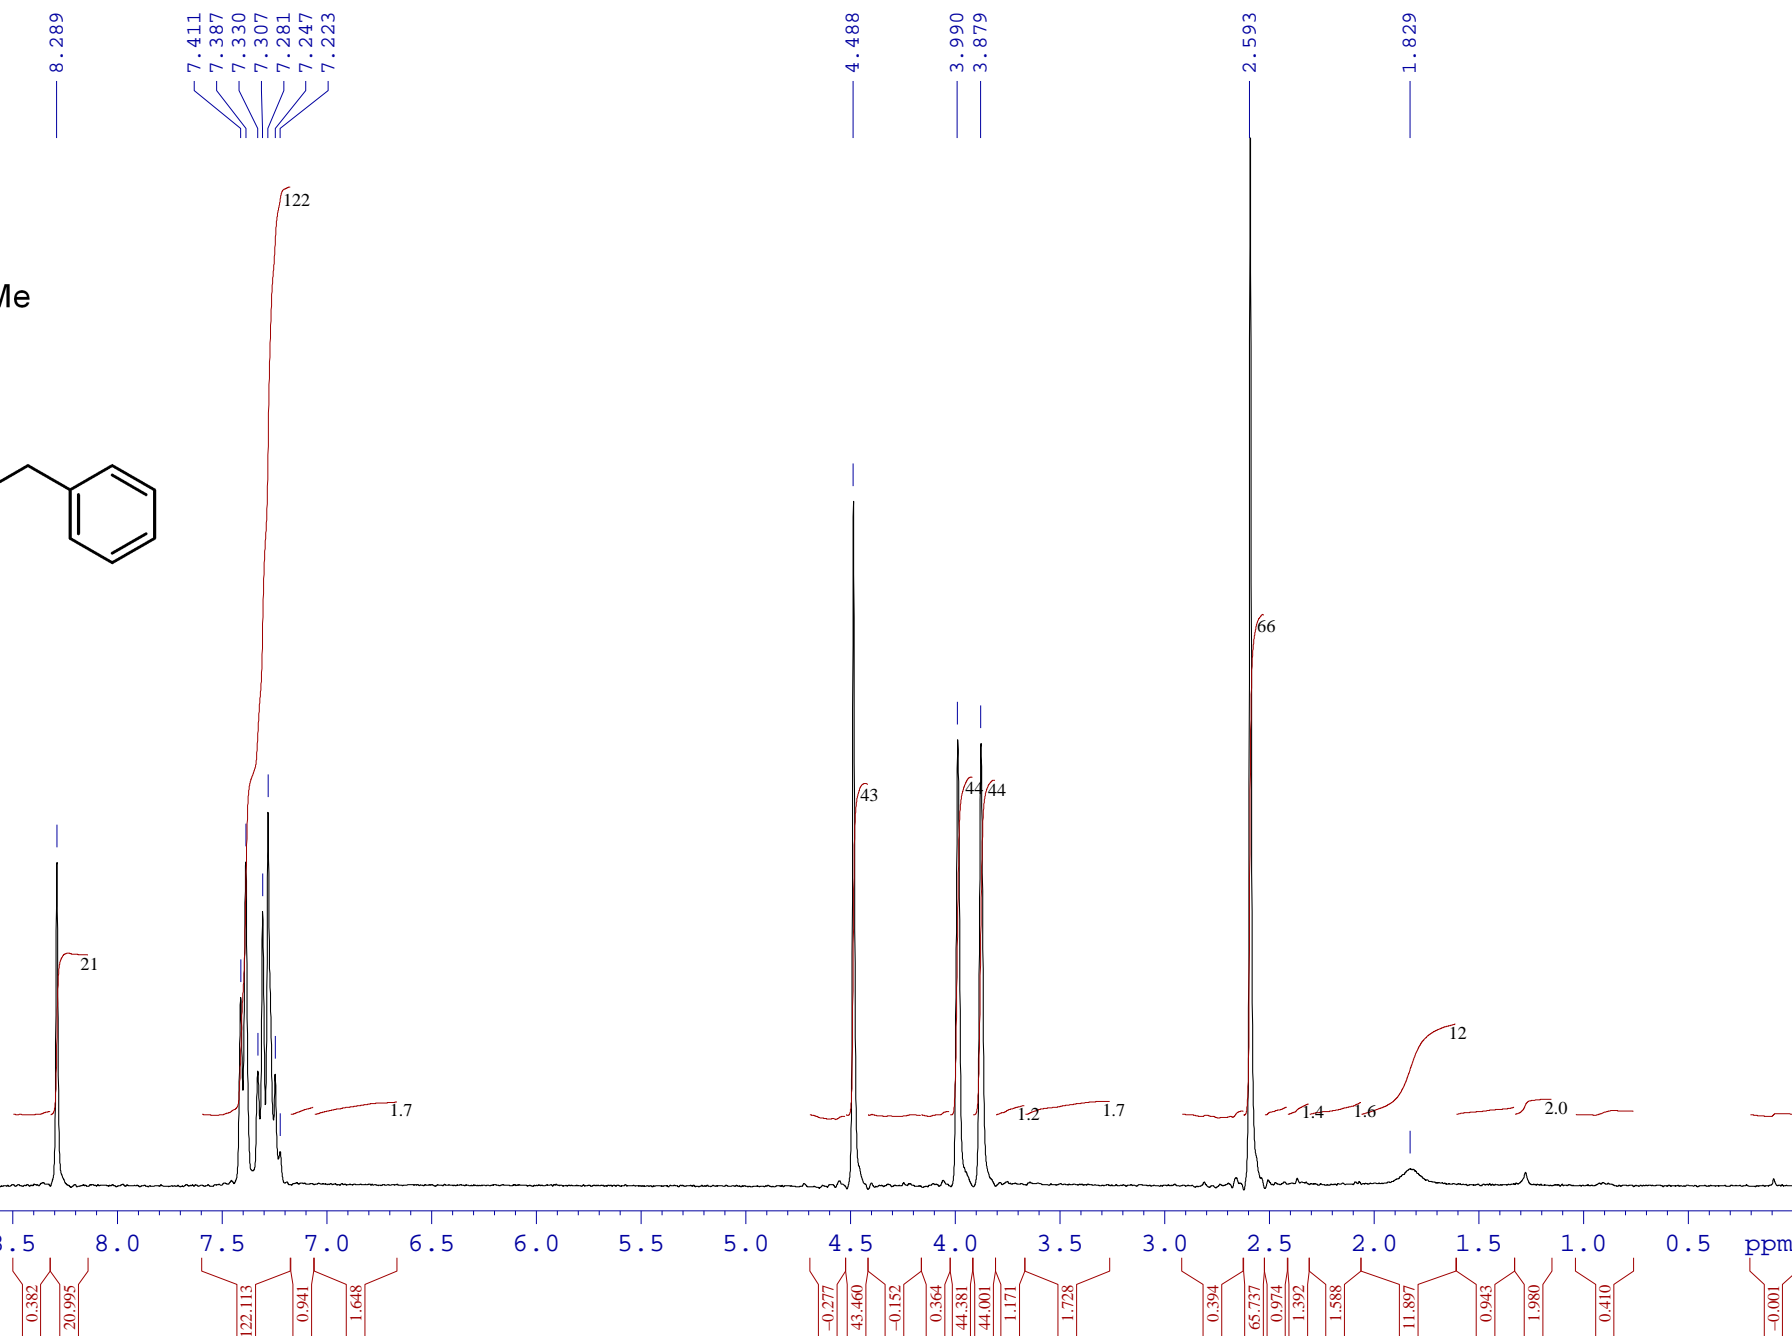



/LPIK AF-409.C13

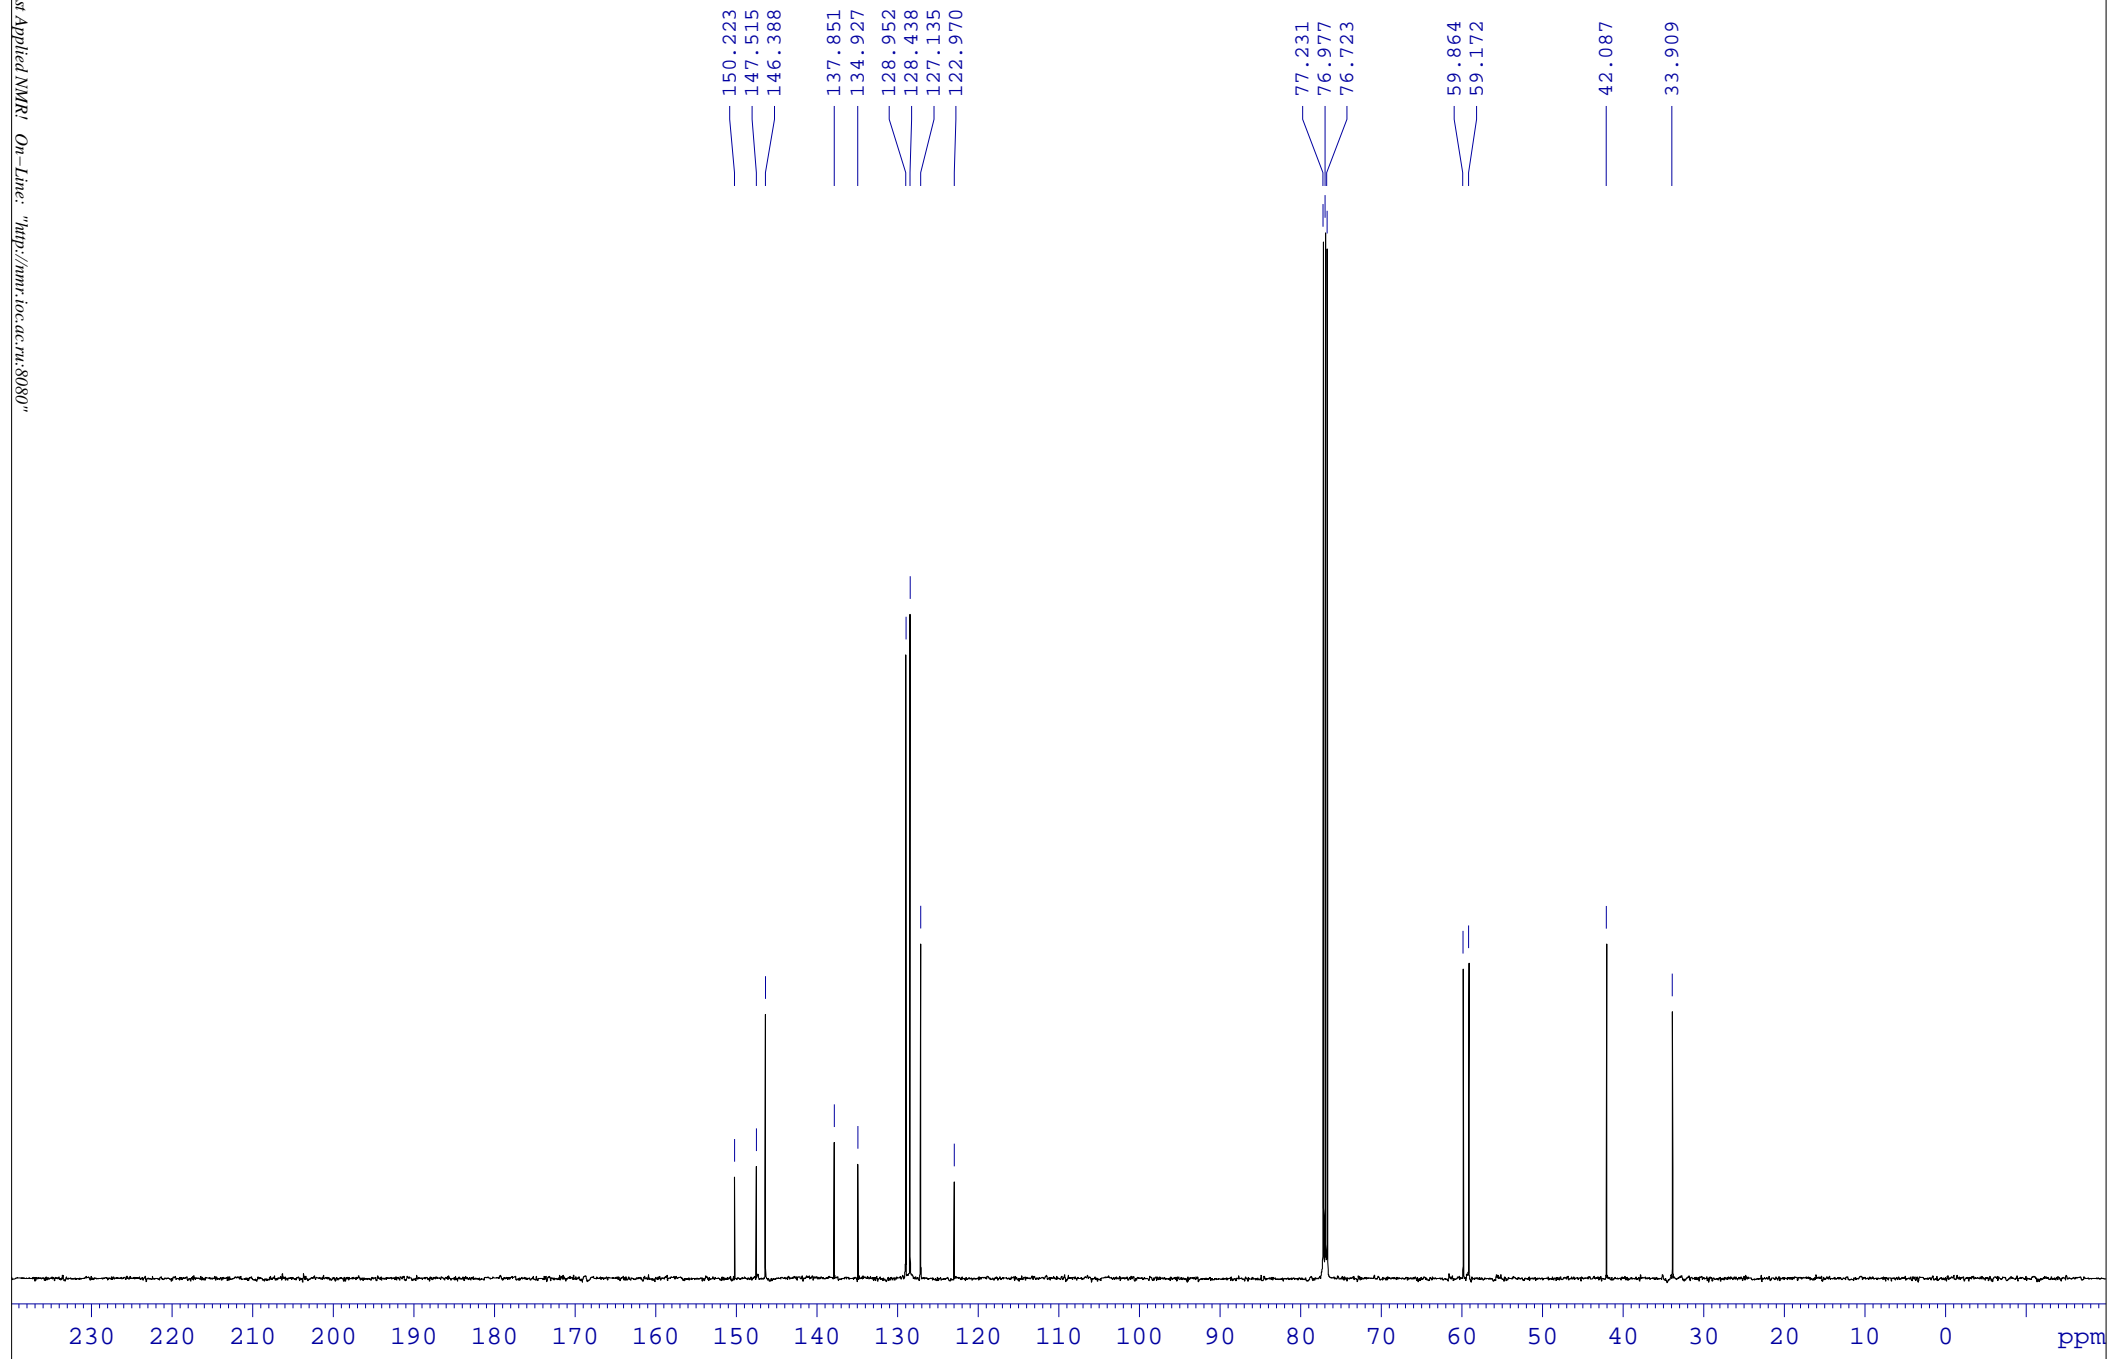

# Display Report

## Analysis Info

Analysis Name D:\Data\Kolotyrkina\2021\Bastrakov\0428030.d  
Method tune\_50-1600.m  
Sample Name /LPIK AF-409  
Comment C15H15ClN2S mH 291.0717 clb added CH3OH

Acquisition Date 28.04.2021 13:26:23

Operator BDAL@DE  
Instrument / Ser# micrOTOF 10248

## Acquisition Parameter

|             |            |                      |          |                  |           |
|-------------|------------|----------------------|----------|------------------|-----------|
| Source Type | ESI        | Ion Polarity         | Positive | Set Nebulizer    | 1.0 Bar   |
| Focus       | Not active |                      |          | Set Dry Heater   | 200 °C    |
| Scan Begin  | 50 m/z     | Set Capillary        | 4500 V   | Set Dry Gas      | 4.0 l/min |
| Scan End    | 1600 m/z   | Set End Plate Offset | -500 V   | Set Divert Valve | Waste     |

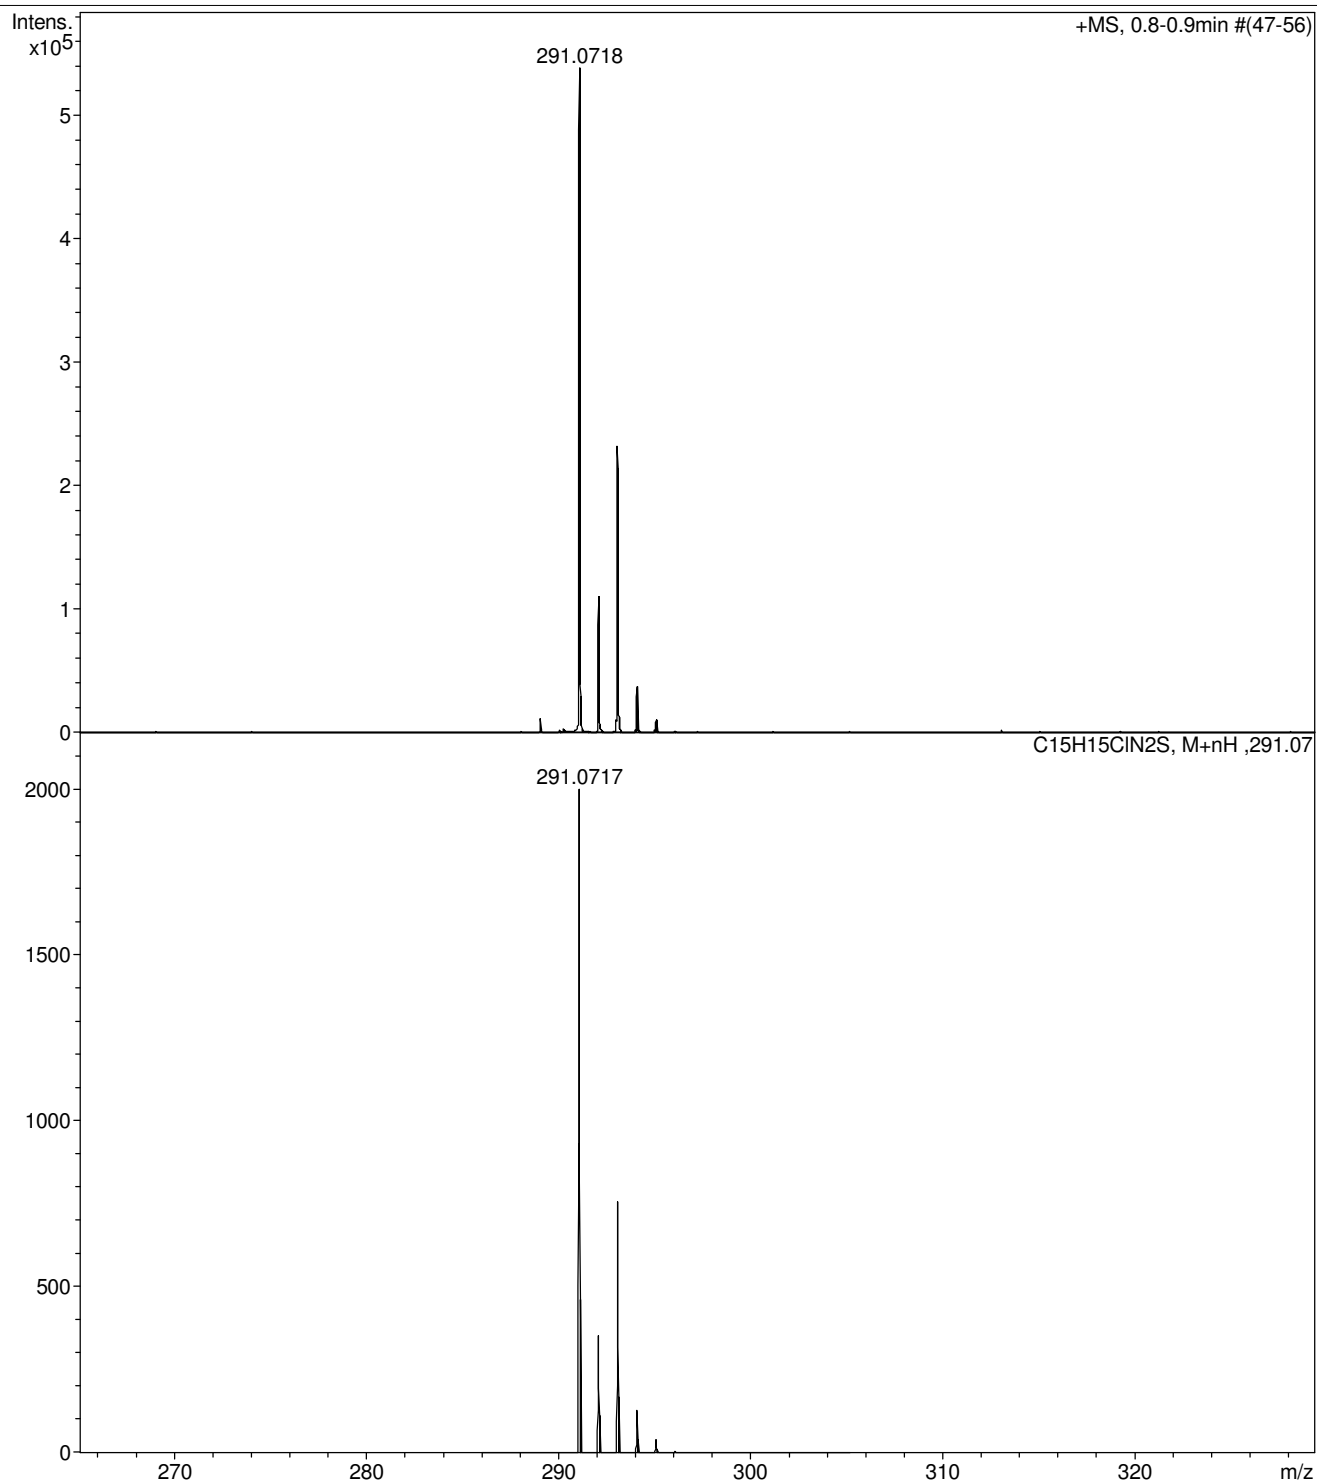



/LPIK AF-413

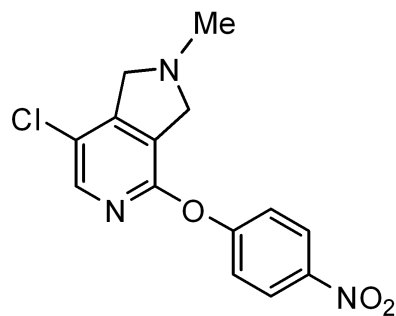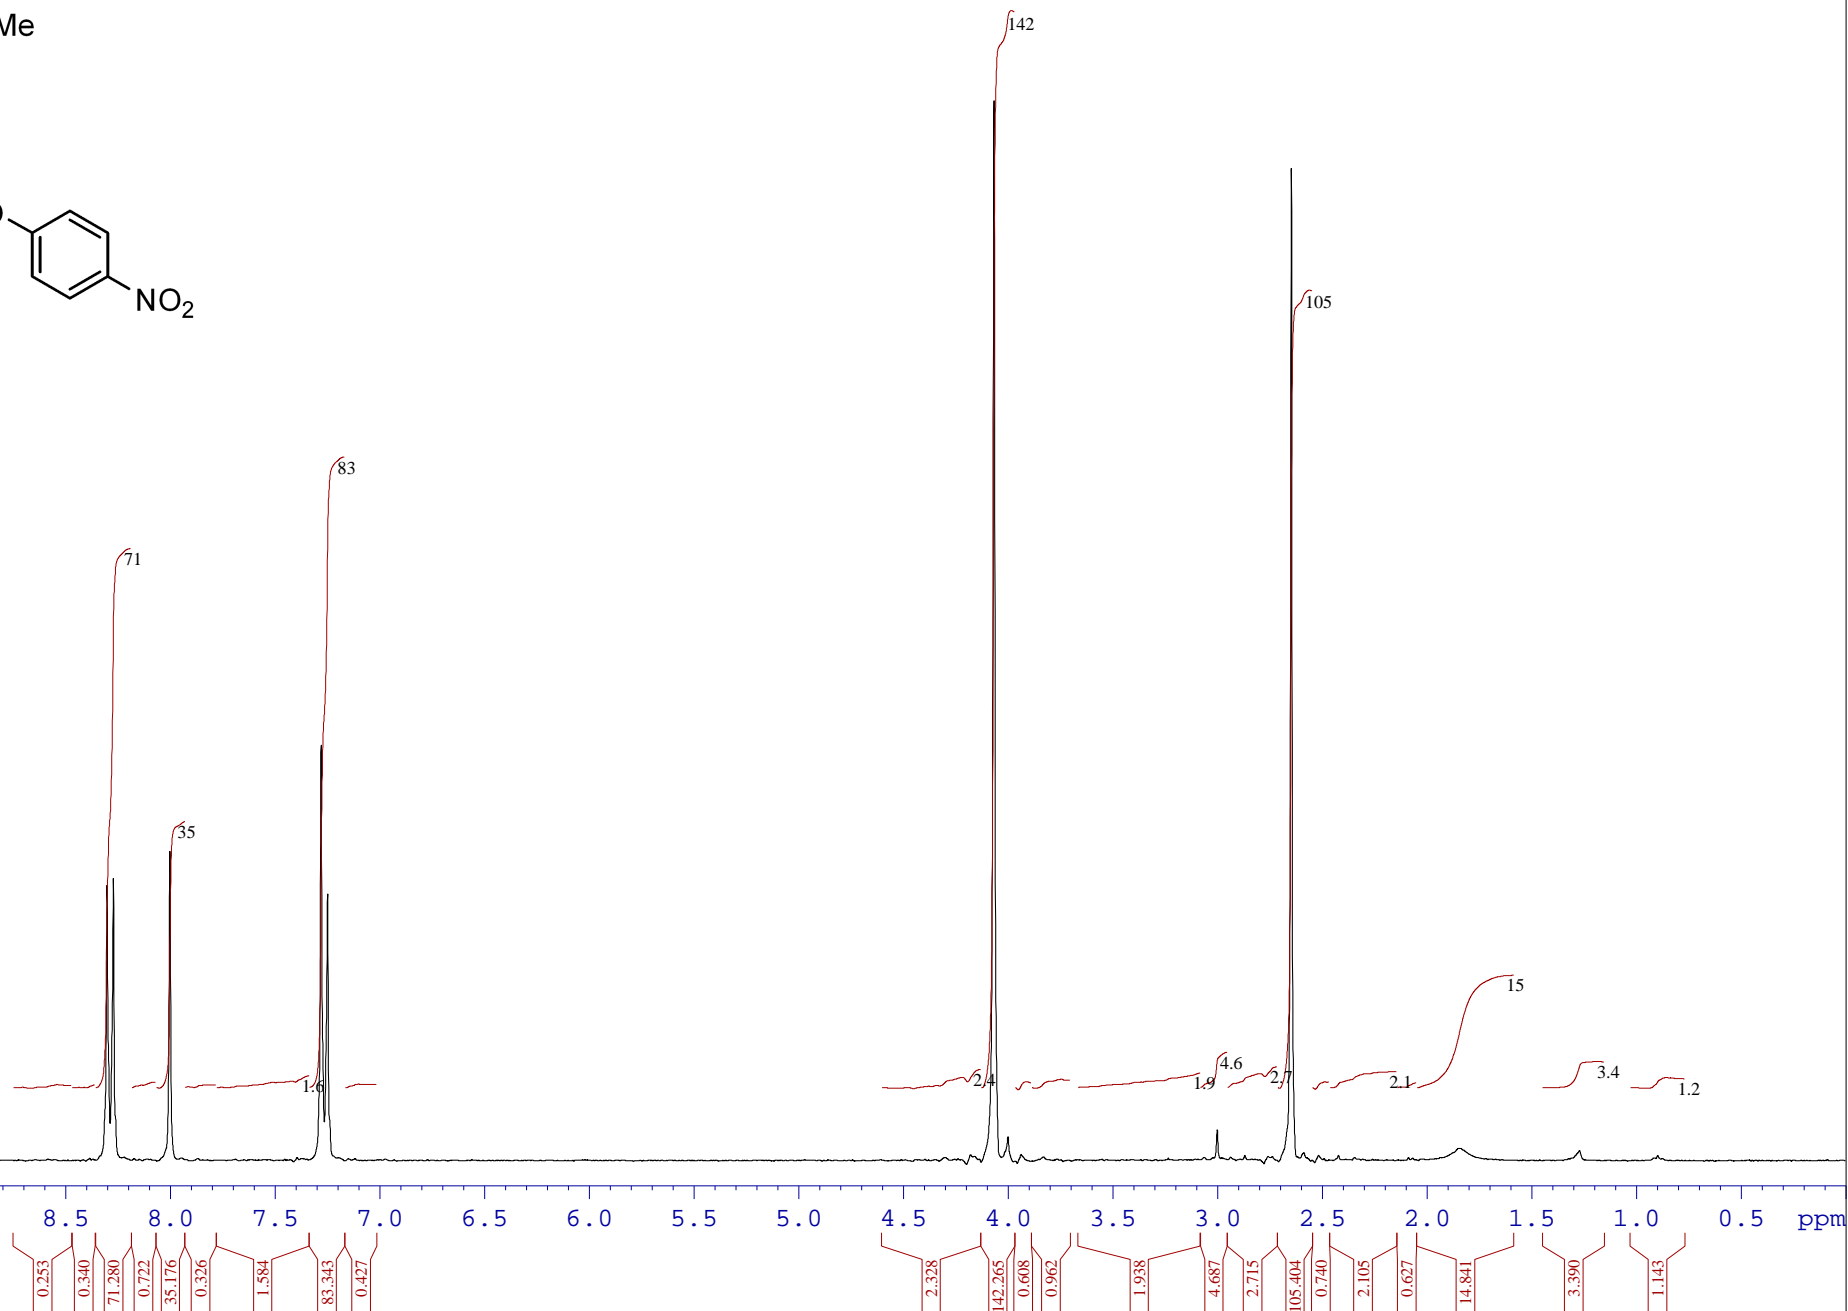



# /LPIK AF-413.C13

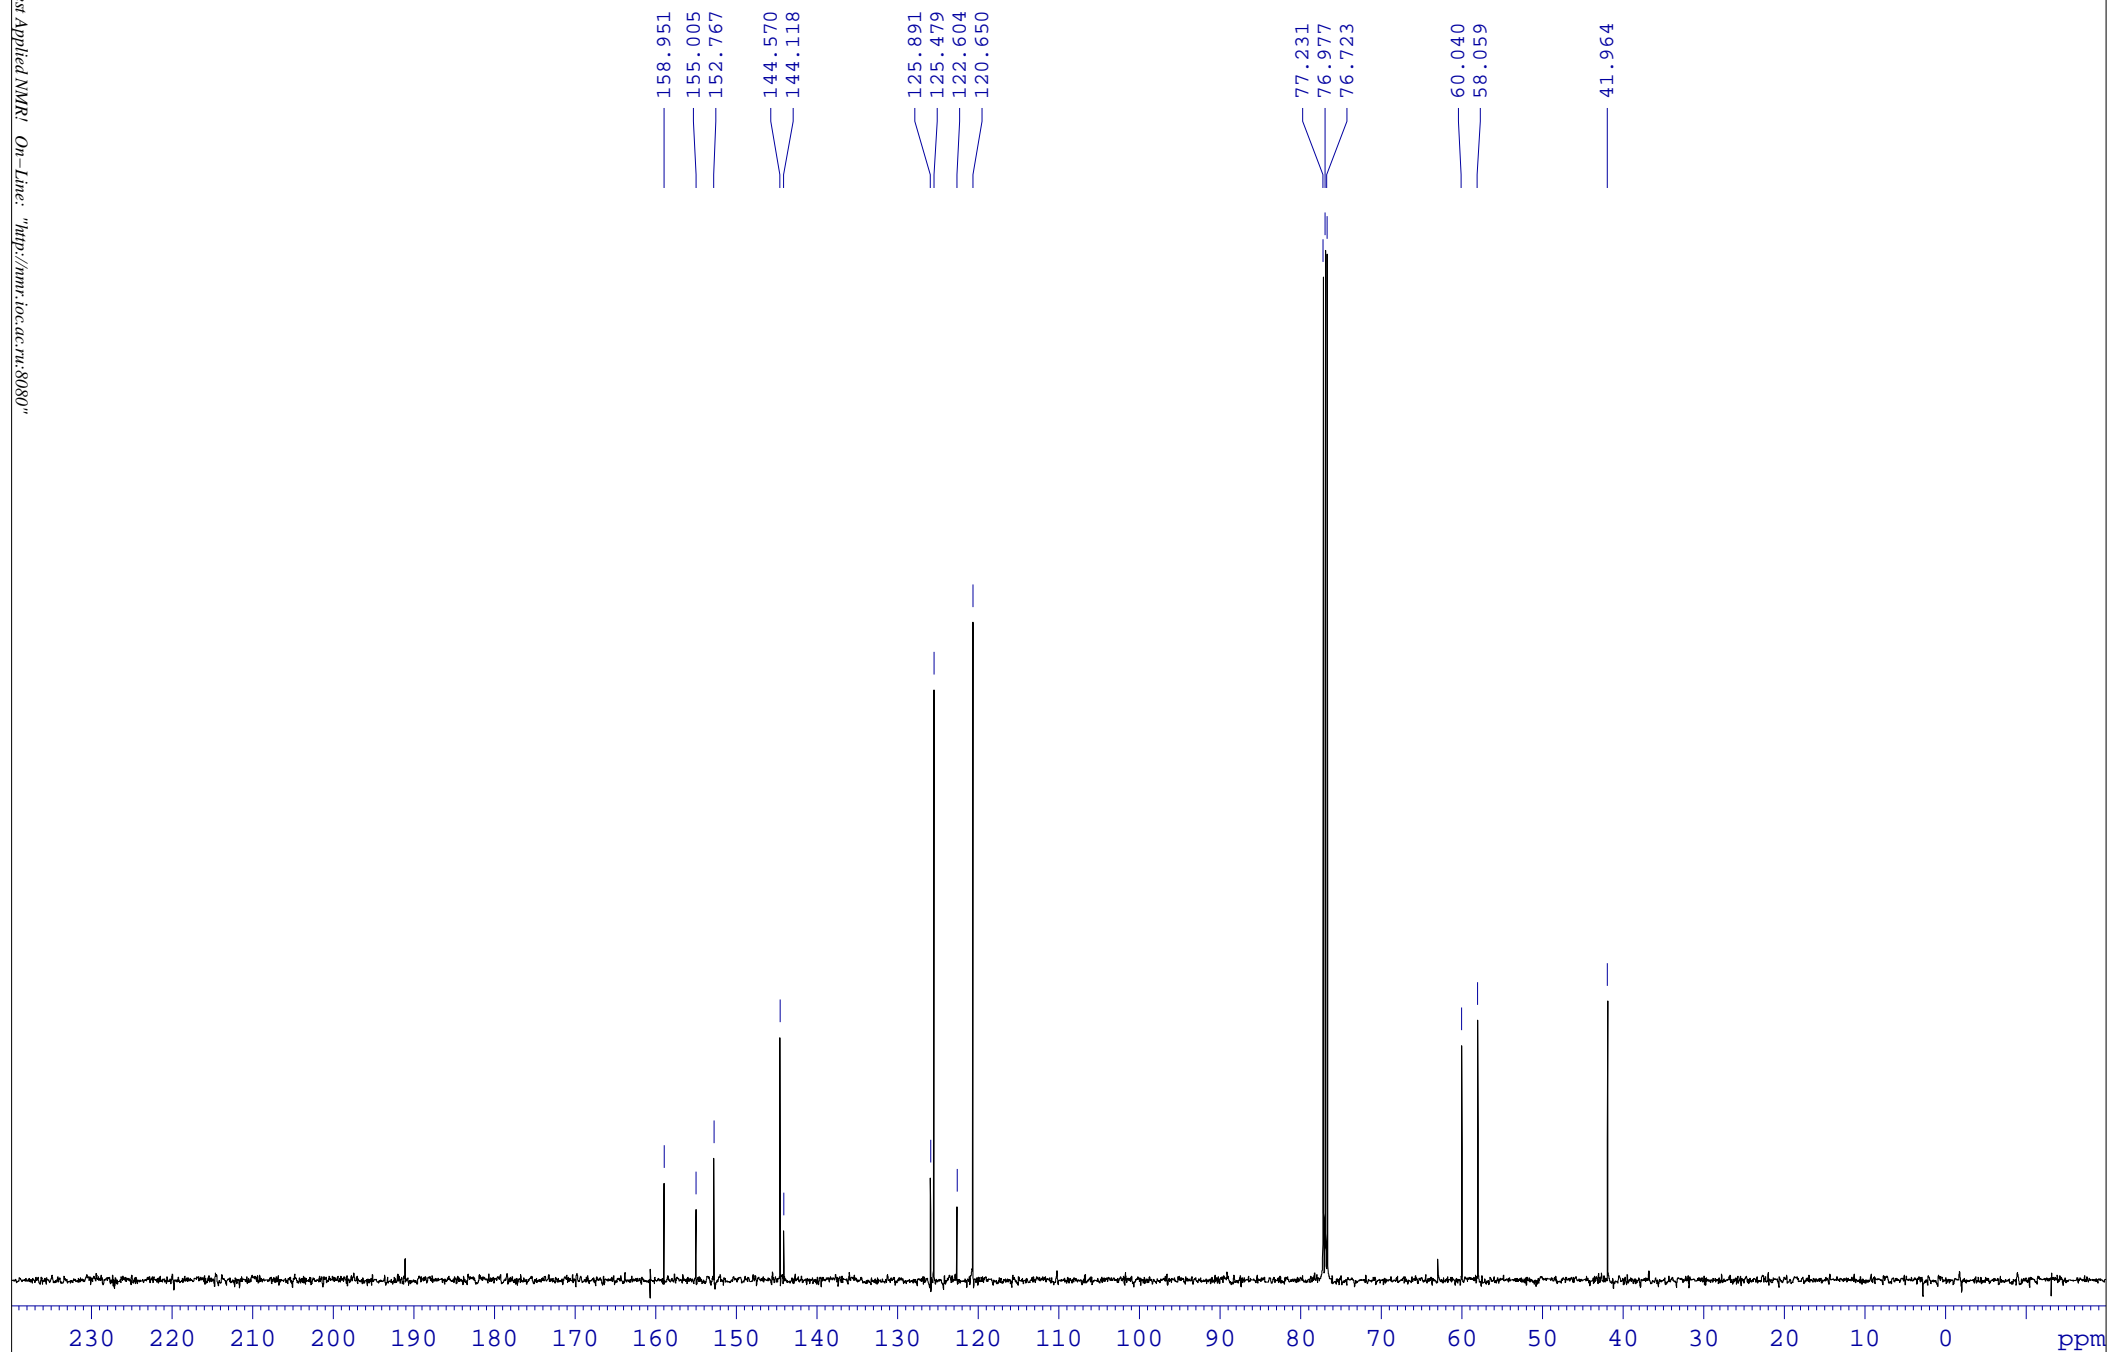

# Display Report

## Analysis Info

Analysis Name D:\Data\Kolotyrkina\2021\Bastrakov\0429049.d  
Method tune\_50-1600.m  
Sample Name /LPIK AF-413  
Comment C14H12CIN3O3 mH 306.0639 clb added CH3OH

Acquisition Date 29.04.2021 17:57:27

Operator BDAL@DE  
Instrument / Ser# micrOTOF 10248

## Acquisition Parameter

|             |            |                      |          |                  |           |
|-------------|------------|----------------------|----------|------------------|-----------|
| Source Type | ESI        | Ion Polarity         | Positive | Set Nebulizer    | 1.0 Bar   |
| Focus       | Not active |                      |          | Set Dry Heater   | 200 °C    |
| Scan Begin  | 50 m/z     | Set Capillary        | 4500 V   | Set Dry Gas      | 4.0 l/min |
| Scan End    | 1600 m/z   | Set End Plate Offset | -500 V   | Set Divert Valve | Waste     |

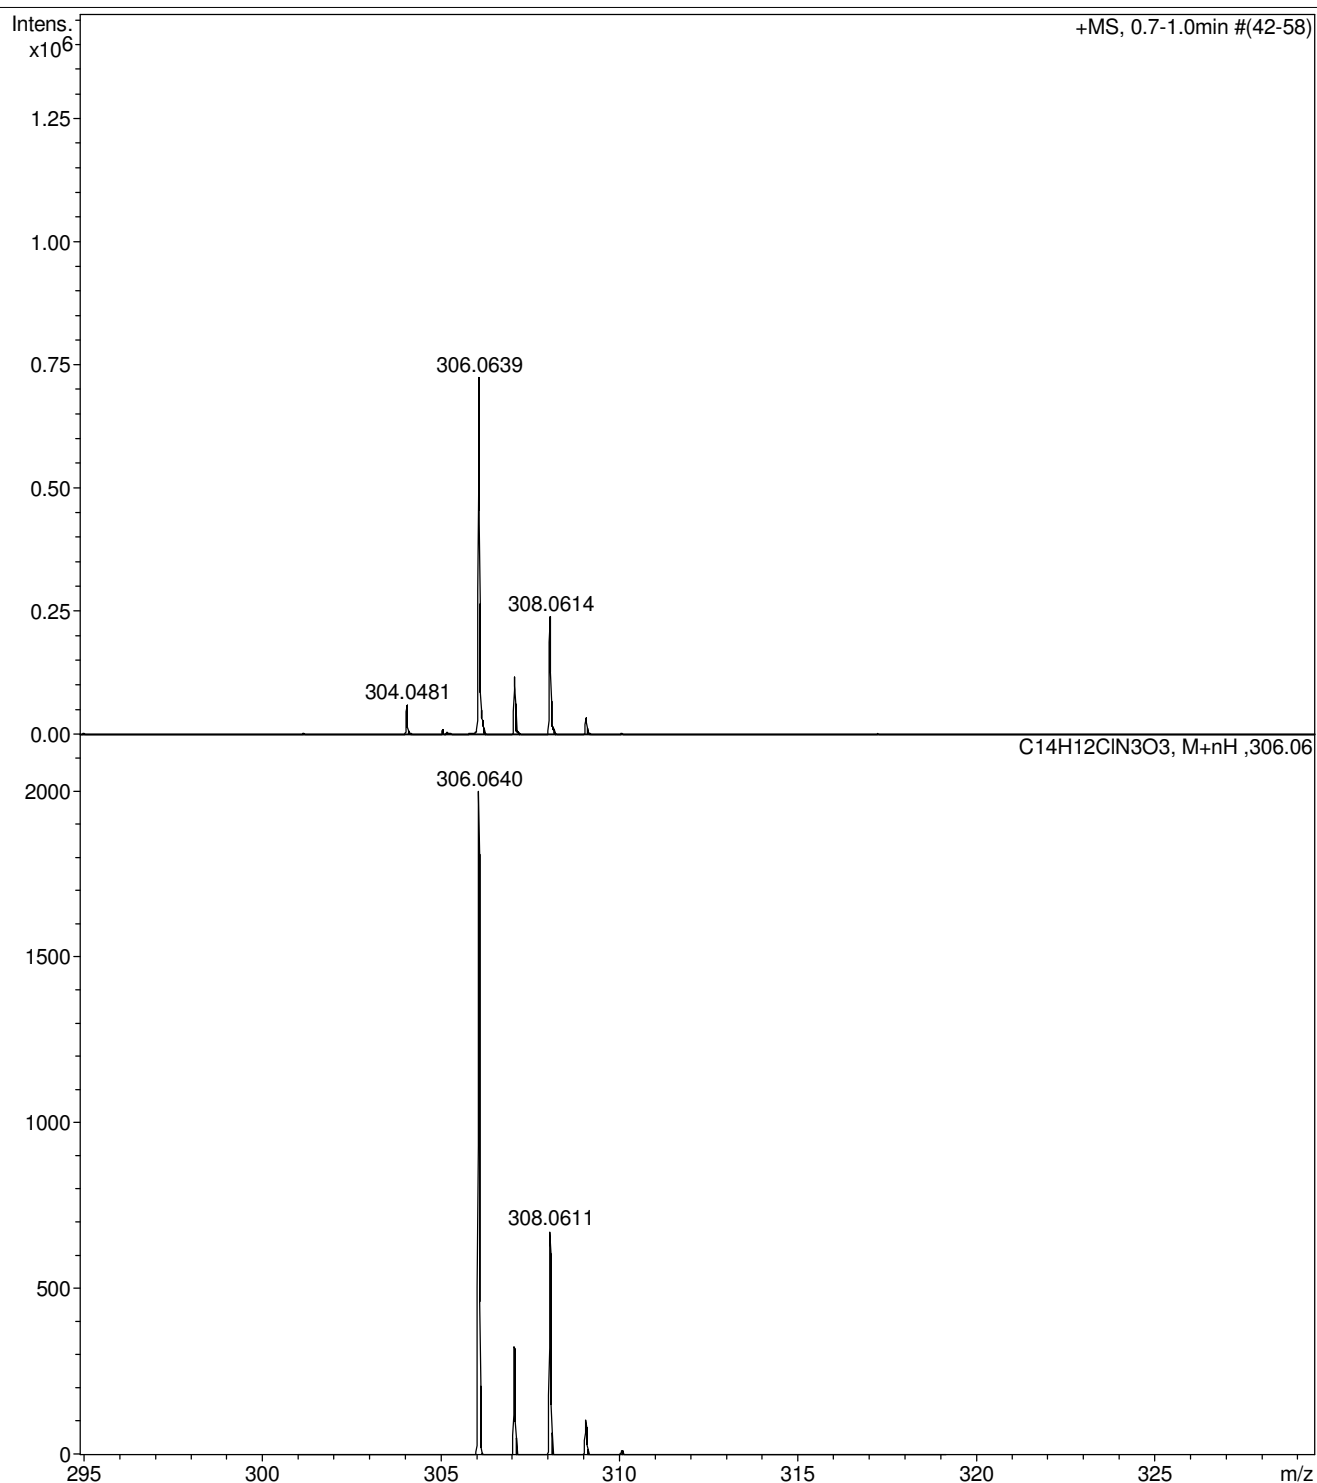



/LPIK AF-429

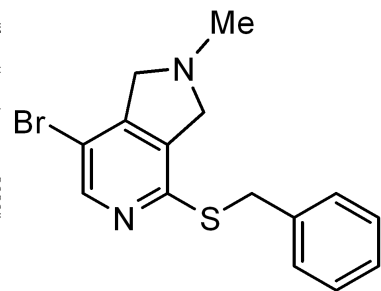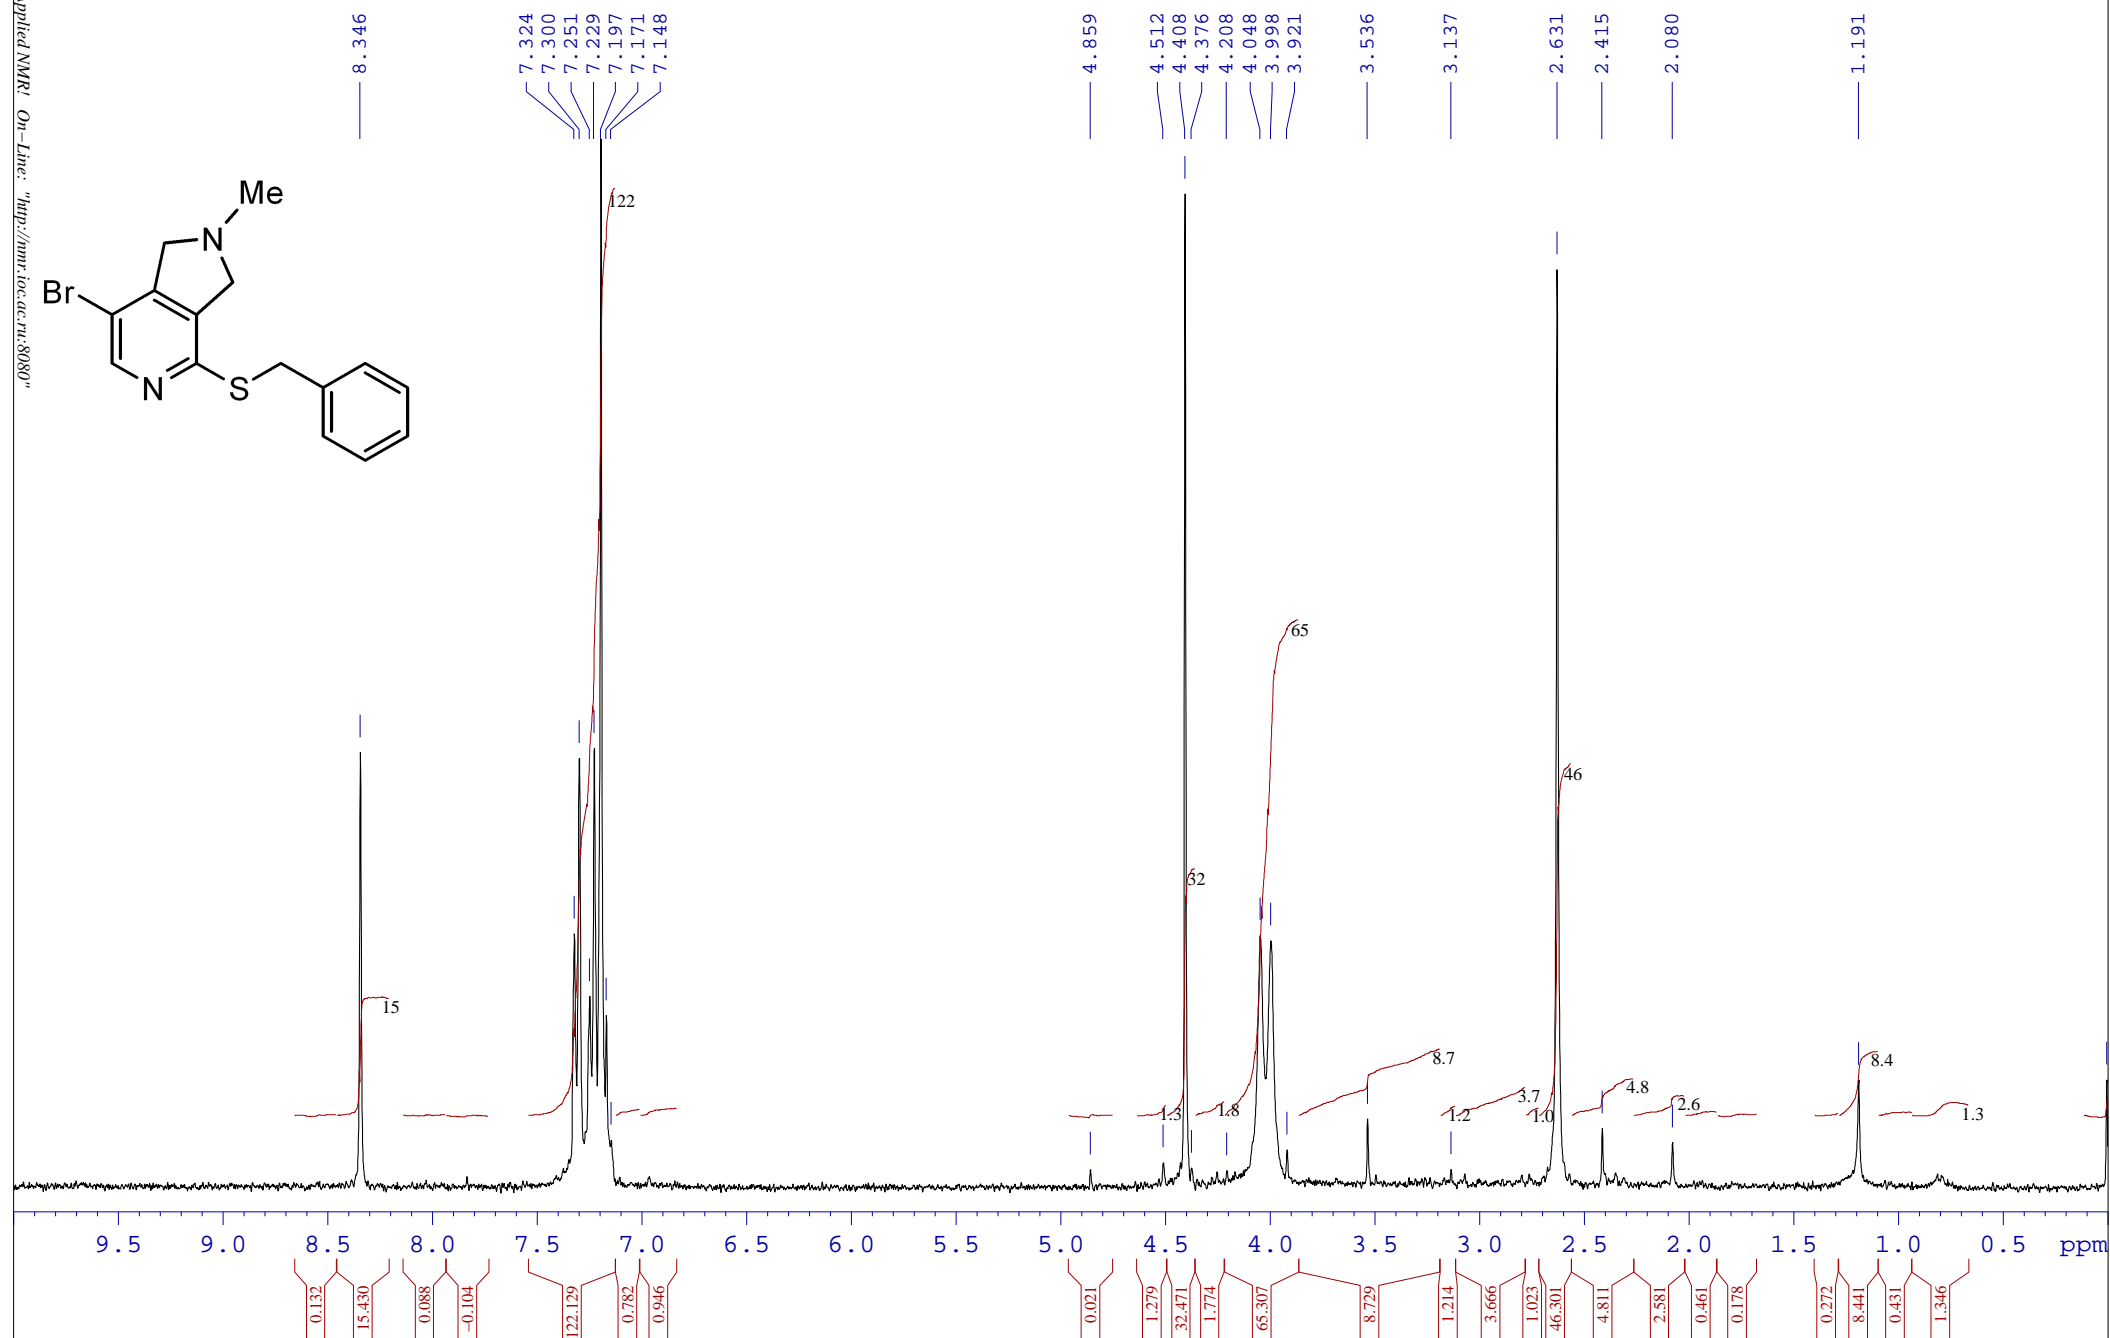





/LPIK AF-429.1.13 Kokorekin-20259

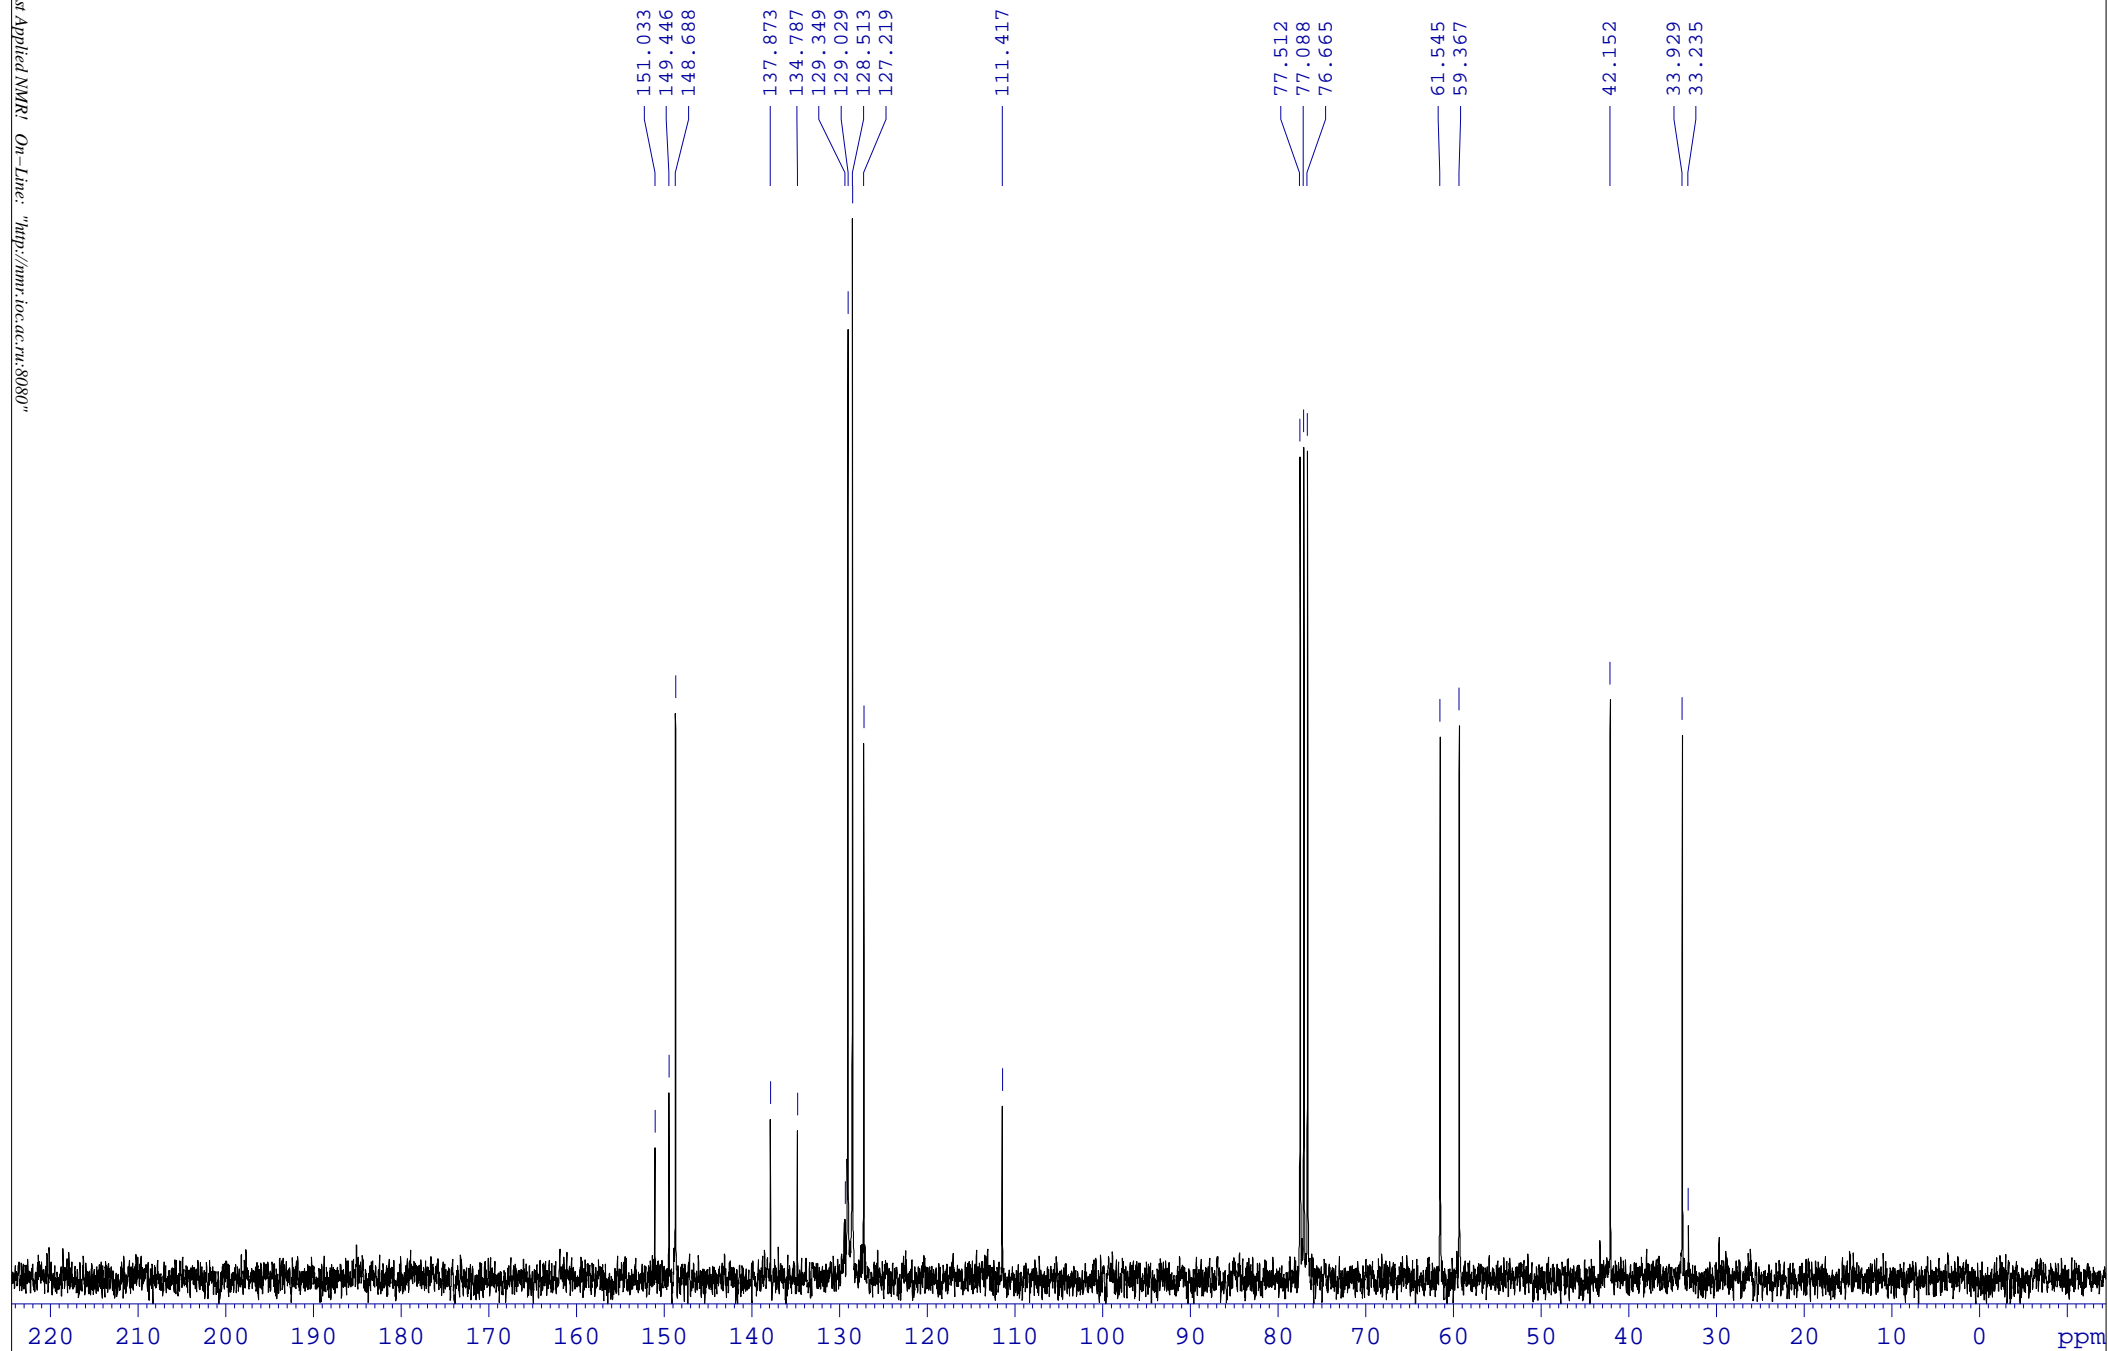

# Display Report

## Analysis Info

Analysis Name D:\Data\Kolotyrkina\2021\Bastrakov\0707026.d  
Method tune\_50-1600.m  
Sample Name /LPIK AF-429P  
Comment C15H15BrN2S mH 335.0212 calibrant added, CH3OH

Acquisition Date 07.07.2021 16:12:07

Operator BDAL@DE  
Instrument / Ser# micrOTOF 10248

## Acquisition Parameter

|             |            |                      |          |                  |           |
|-------------|------------|----------------------|----------|------------------|-----------|
| Source Type | ESI        | Ion Polarity         | Positive | Set Nebulizer    | 1.0 Bar   |
| Focus       | Not active |                      |          | Set Dry Heater   | 200 °C    |
| Scan Begin  | 50 m/z     | Set Capillary        | 4500 V   | Set Dry Gas      | 4.0 l/min |
| Scan End    | 1600 m/z   | Set End Plate Offset | -500 V   | Set Divert Valve | Waste     |

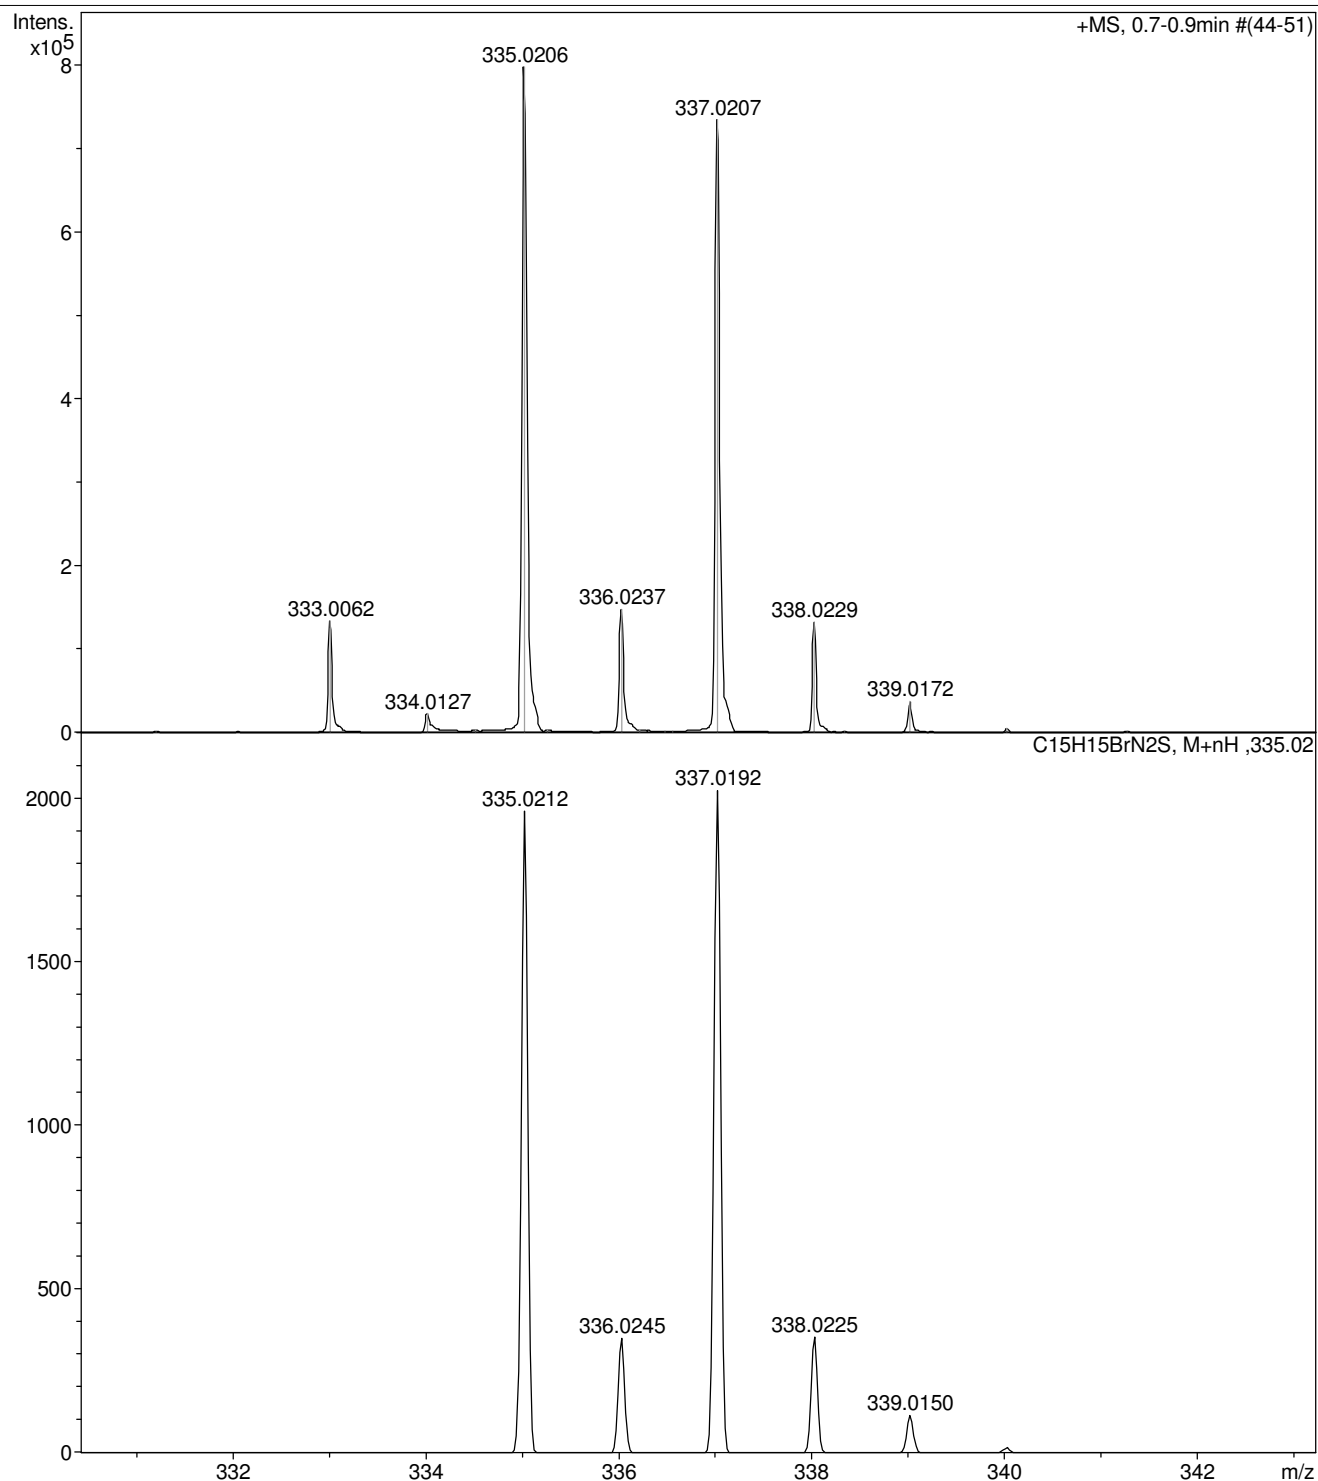



/LPIK AF-430

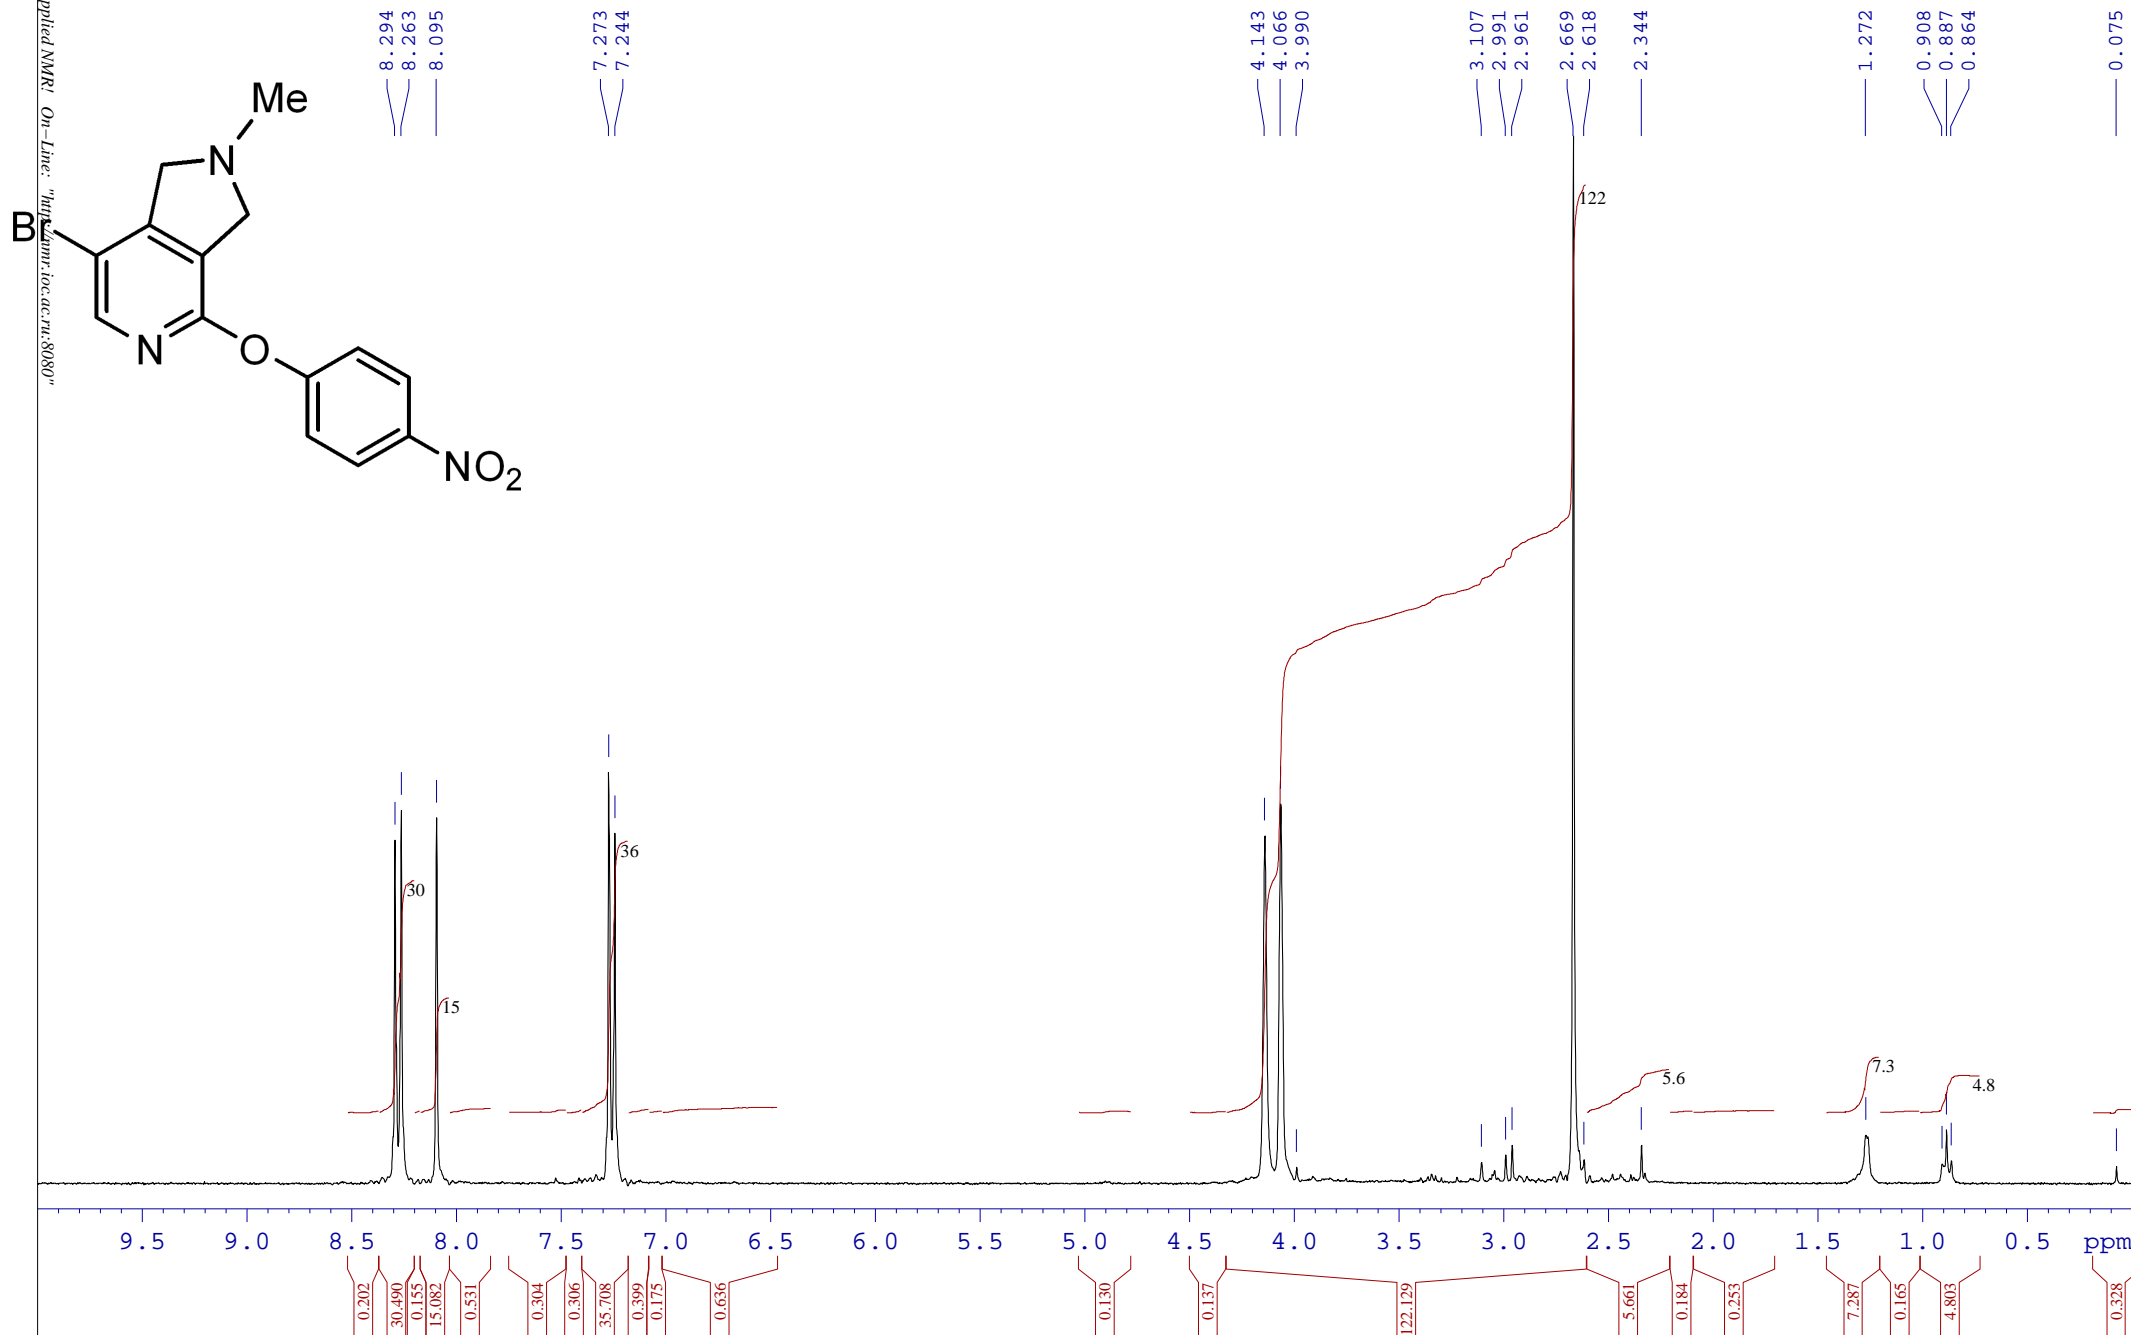



/LPIK AF-430.C13

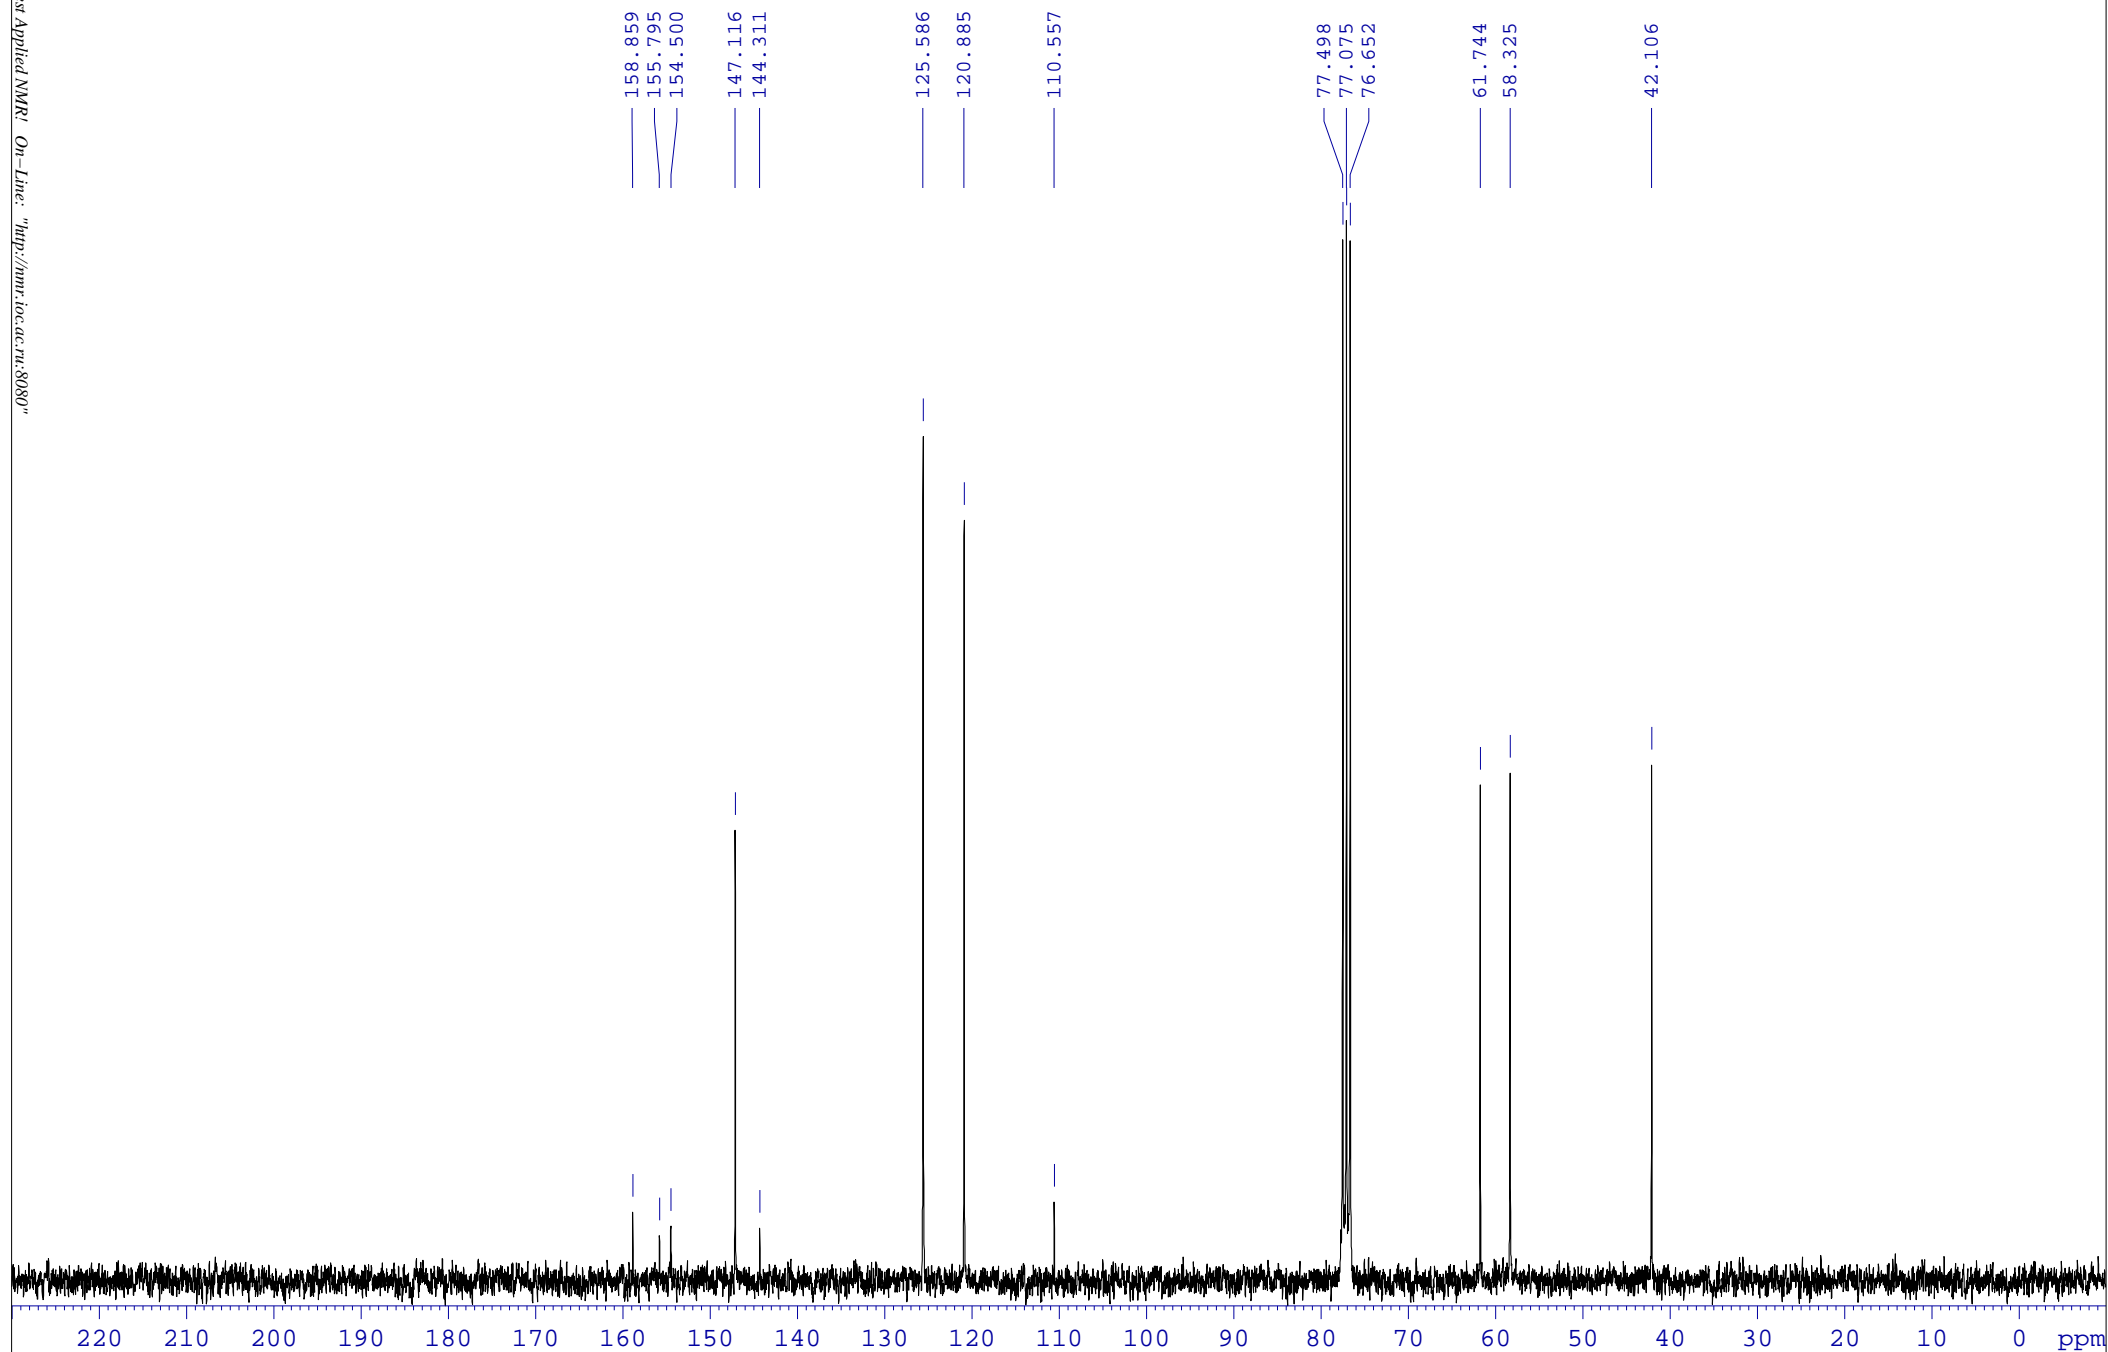

# Display Report

## Analysis Info

Analysis Name D:\Data\Kolotyrkina\2021\Bastrakov\0429051.d  
Method tune\_50-1600.m  
Sample Name /LPIK AF-430  
Comment C14H12BrN3O3 mH 350.0134clb added CH3OH

Acquisition Date 29.04.2021 18:06:30

Operator BDAL@DE  
Instrument / Ser# micrOTOF 10248

## Acquisition Parameter

|             |            |                      |          |                  |           |
|-------------|------------|----------------------|----------|------------------|-----------|
| Source Type | ESI        | Ion Polarity         | Positive | Set Nebulizer    | 1.0 Bar   |
| Focus       | Not active |                      |          | Set Dry Heater   | 200 °C    |
| Scan Begin  | 50 m/z     | Set Capillary        | 4500 V   | Set Dry Gas      | 4.0 l/min |
| Scan End    | 1600 m/z   | Set End Plate Offset | -500 V   | Set Divert Valve | Waste     |

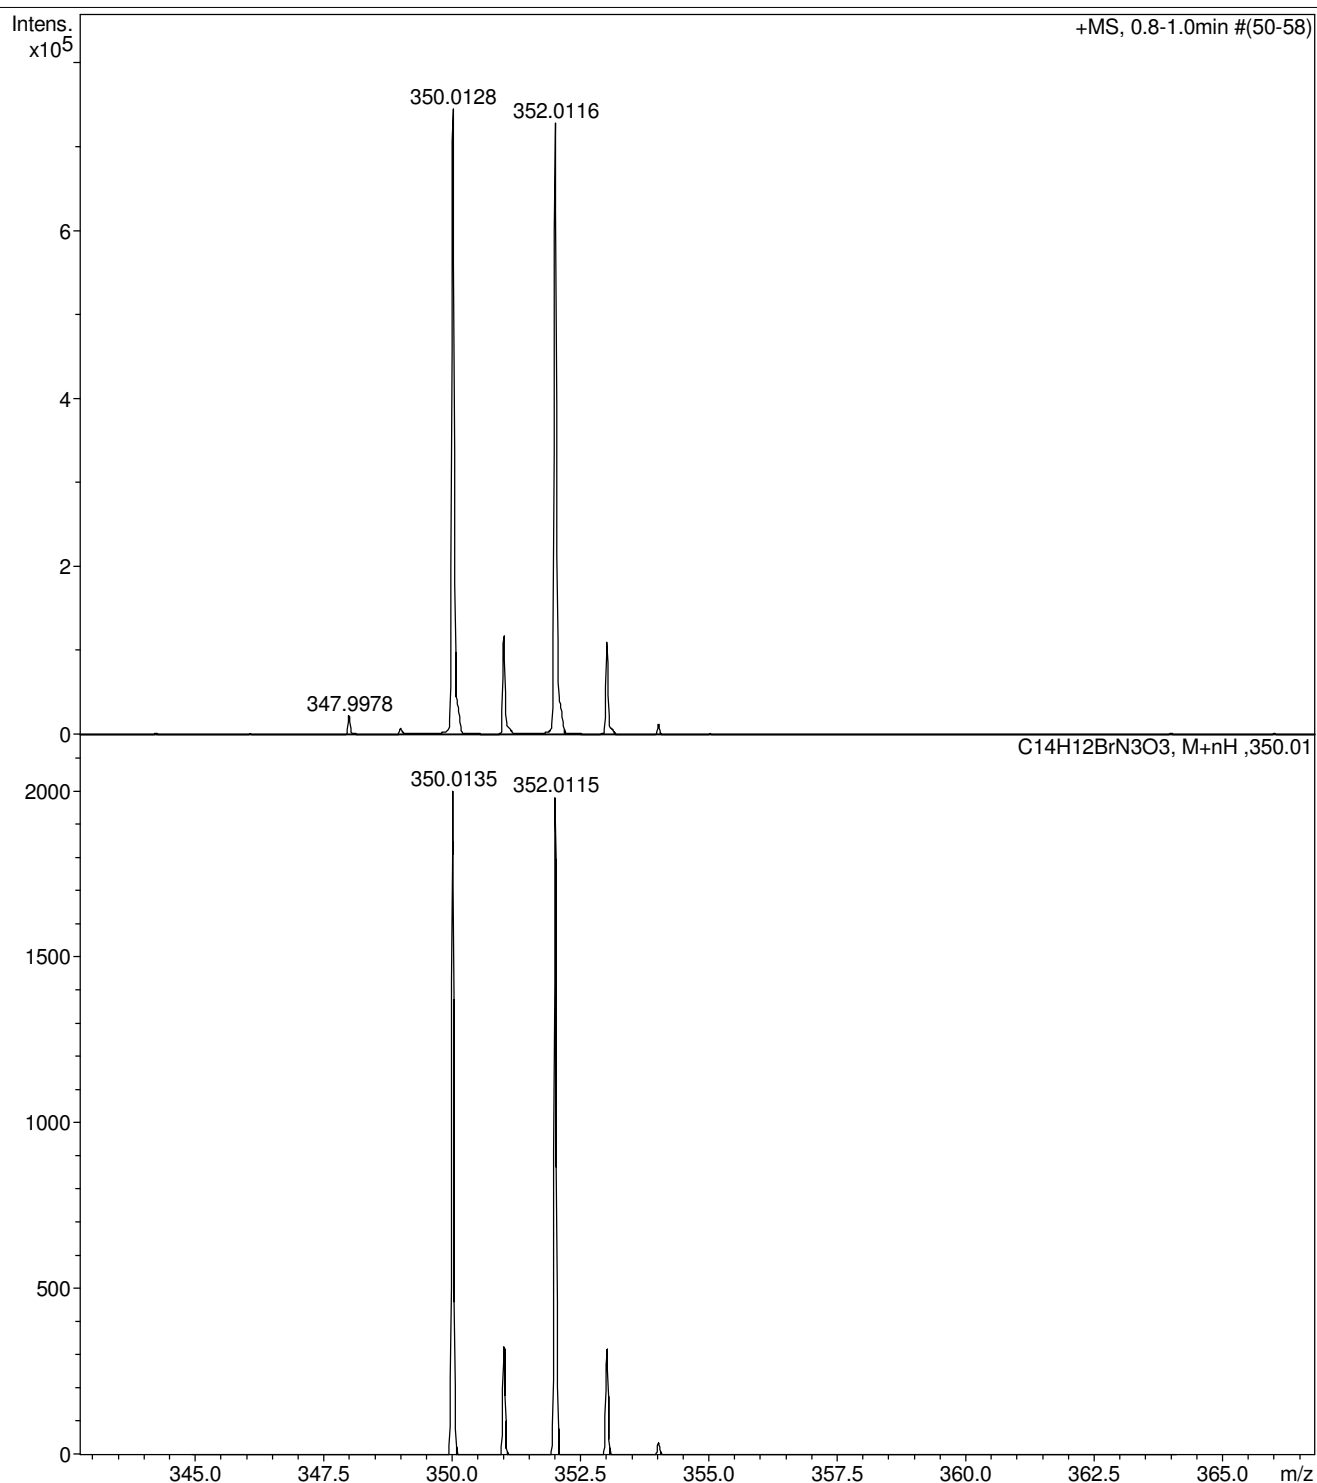



/LPIK AF-432.1.1 Kokorekin-20259

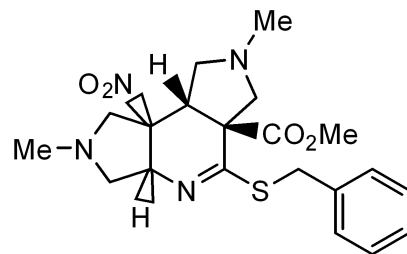

7.343  
7.335  
7.314  
7.291  
7.284  
7.272  
7.267  
7.265  
7.258  
7.251  
7.241  
7.229  
7.216  
7.209

4.953  
4.946  
4.943  
4.932  
4.928  
4.922

4.257  
4.212  
4.137  
4.091  
3.761  
3.745  
3.665  
3.641  
3.632  
3.614  
3.608  
3.581  
3.394  
3.390  
3.374  
3.356  
3.353  
3.350  
3.344  
3.318  
3.023  
2.986  
2.763  
2.734  
2.706  
2.540  
2.531  
2.507  
2.498  
2.271  
2.258  
2.247  
2.215  
2.184  
2.045

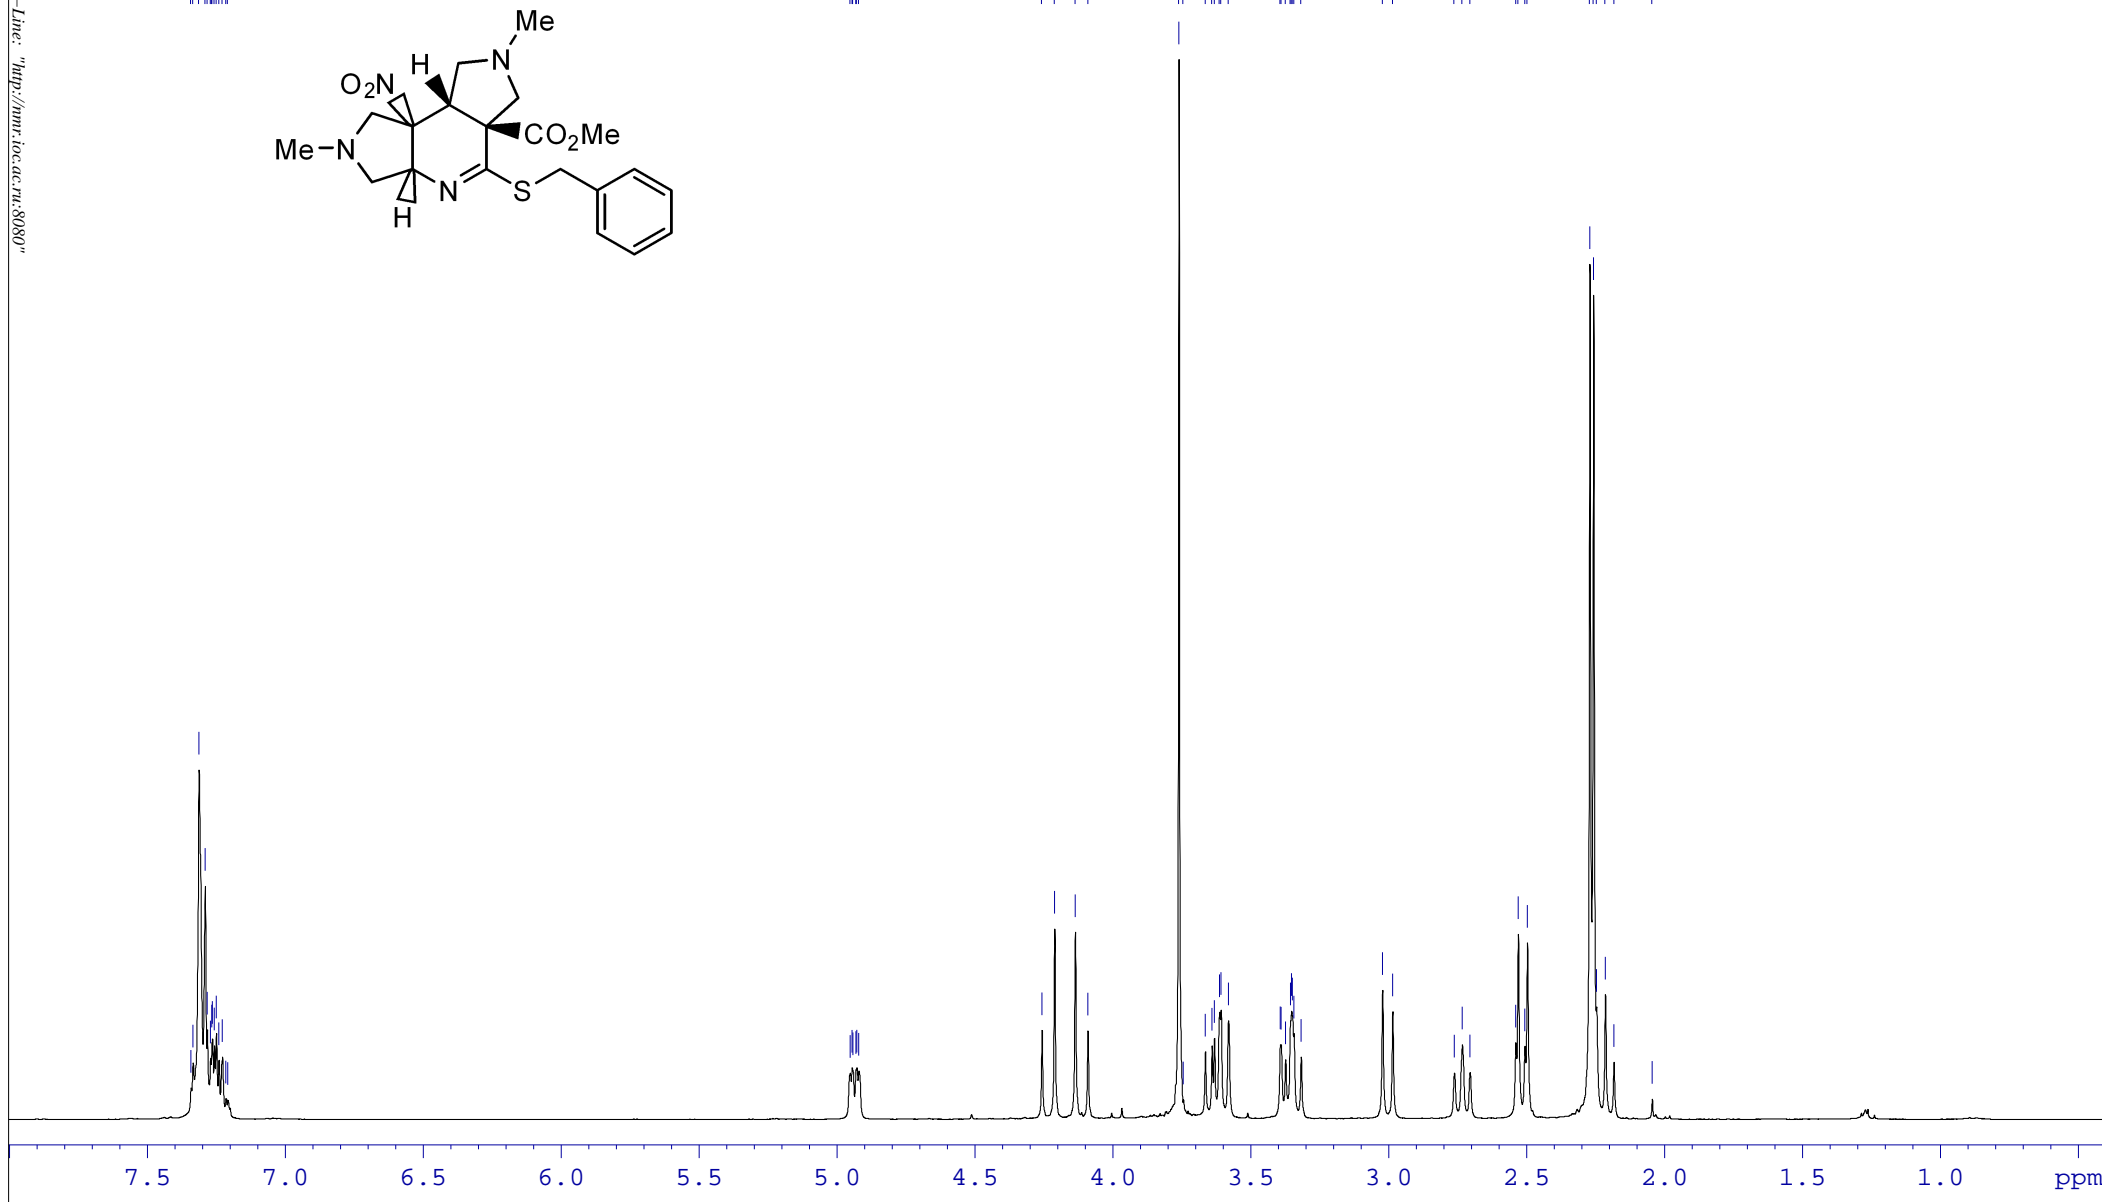



# /LPIK AF-432.1 Kokorekin-20259

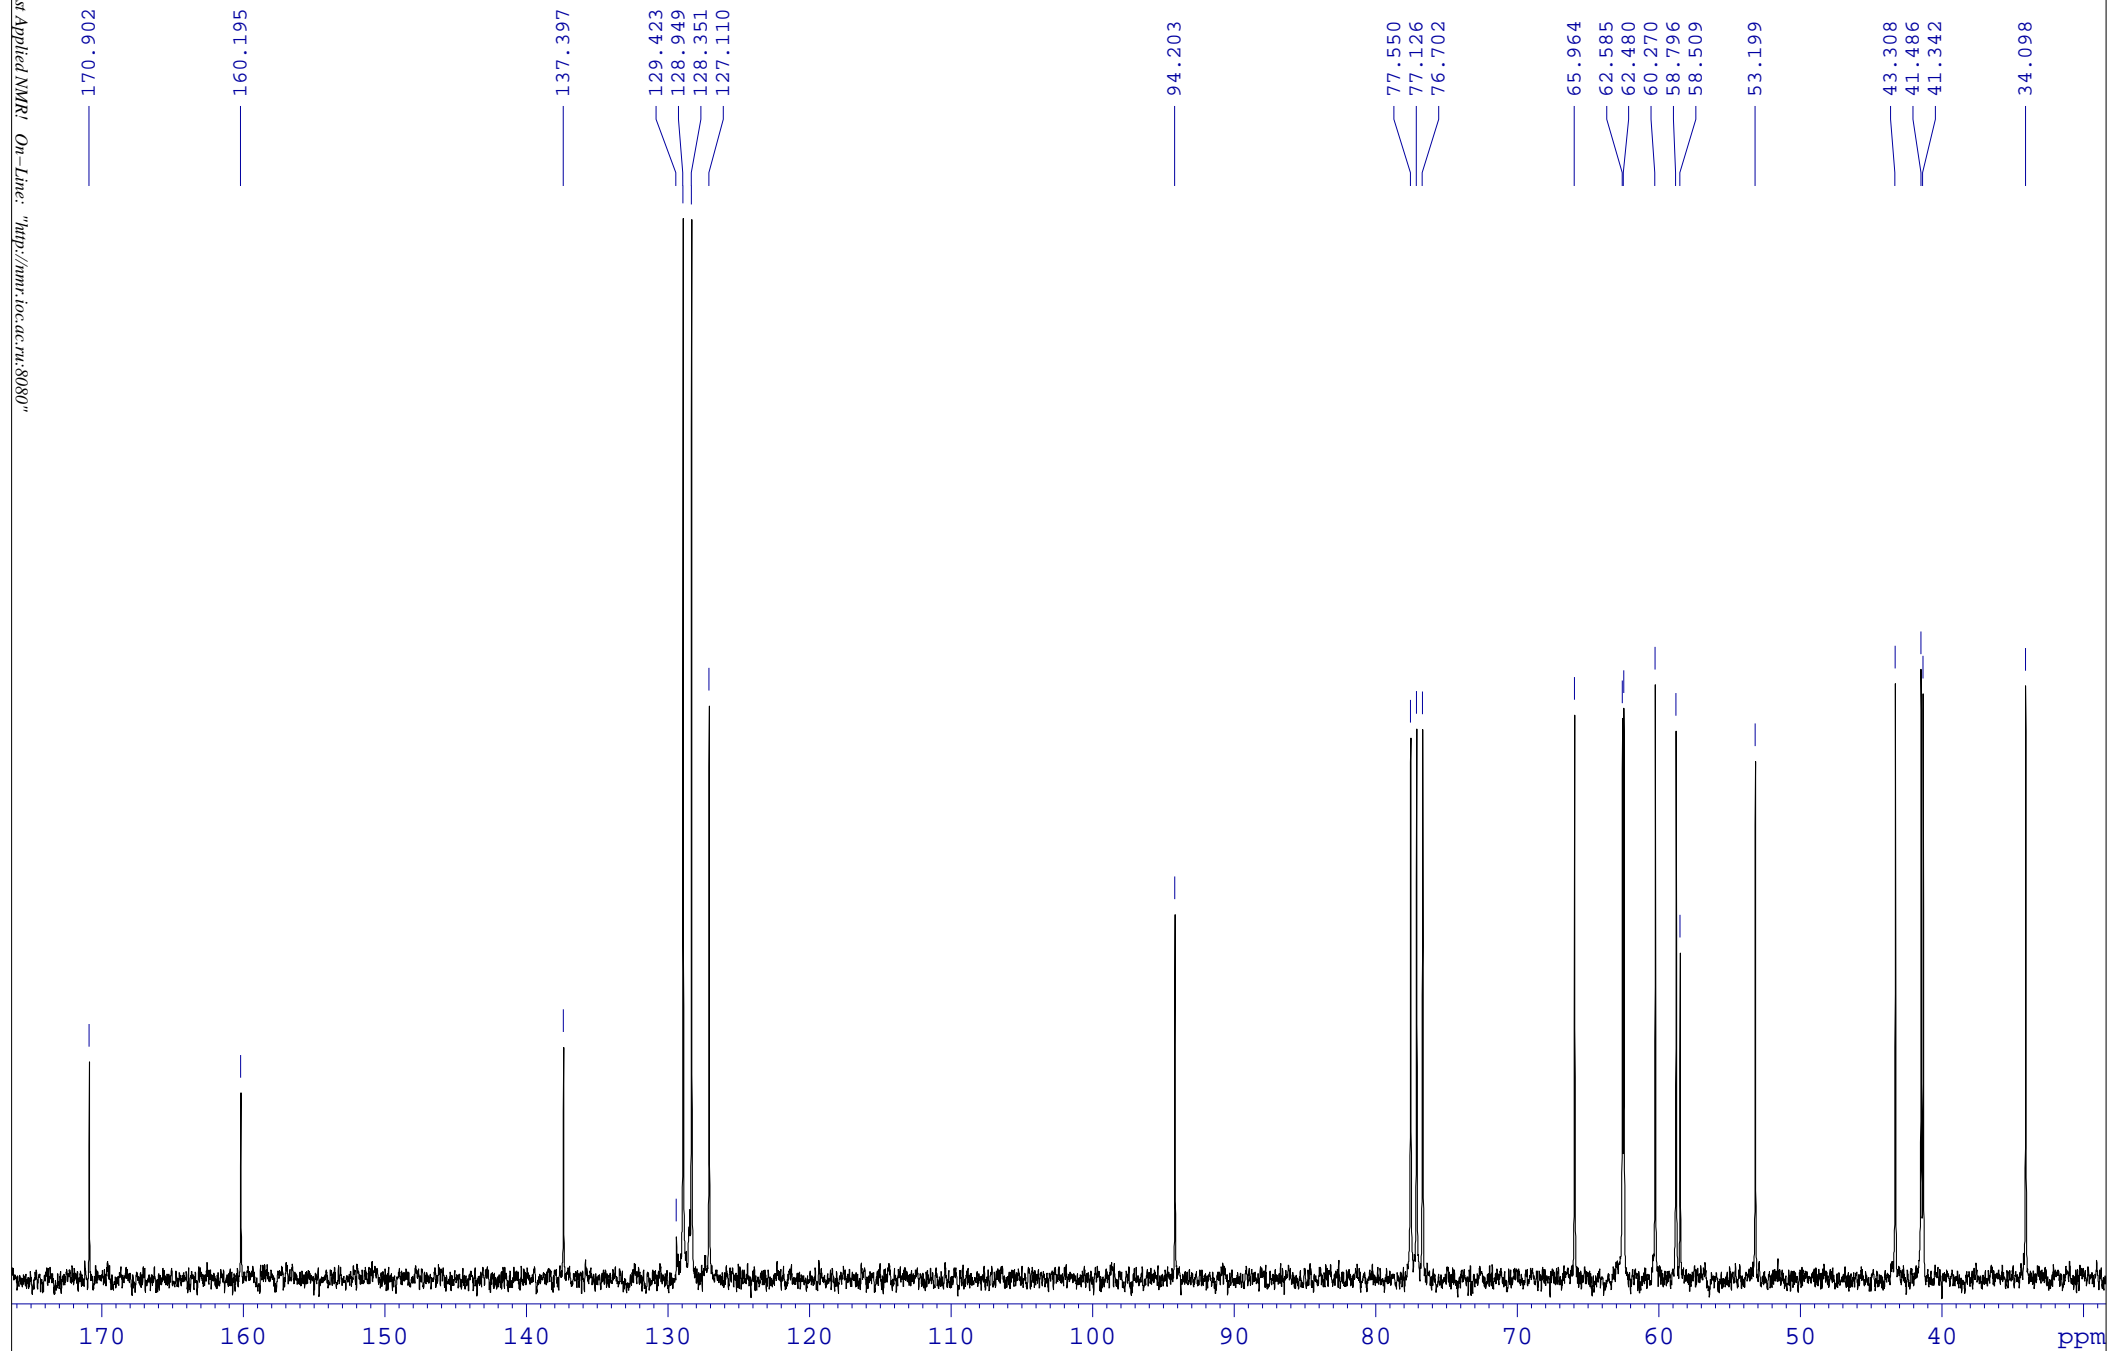

# Display Report

## Analysis Info

Analysis Name D:\Data\Kolotyrkina\2021\Bastrakov\0429052.d  
Method tune\_50-1600.m  
Sample Name /LPIK AF-432.1  
Comment C20H26N4O4S mH 419.1747 clb added CH3OH

Acquisition Date 29.04.2021 18:12:20

Operator BDAL@DE  
Instrument / Ser# micrOTOF 10248

## Acquisition Parameter

|             |            |                      |          |                  |           |
|-------------|------------|----------------------|----------|------------------|-----------|
| Source Type | ESI        | Ion Polarity         | Positive | Set Nebulizer    | 1.0 Bar   |
| Focus       | Not active |                      |          | Set Dry Heater   | 200 °C    |
| Scan Begin  | 50 m/z     | Set Capillary        | 4500 V   | Set Dry Gas      | 4.0 l/min |
| Scan End    | 1600 m/z   | Set End Plate Offset | -500 V   | Set Divert Valve | Waste     |

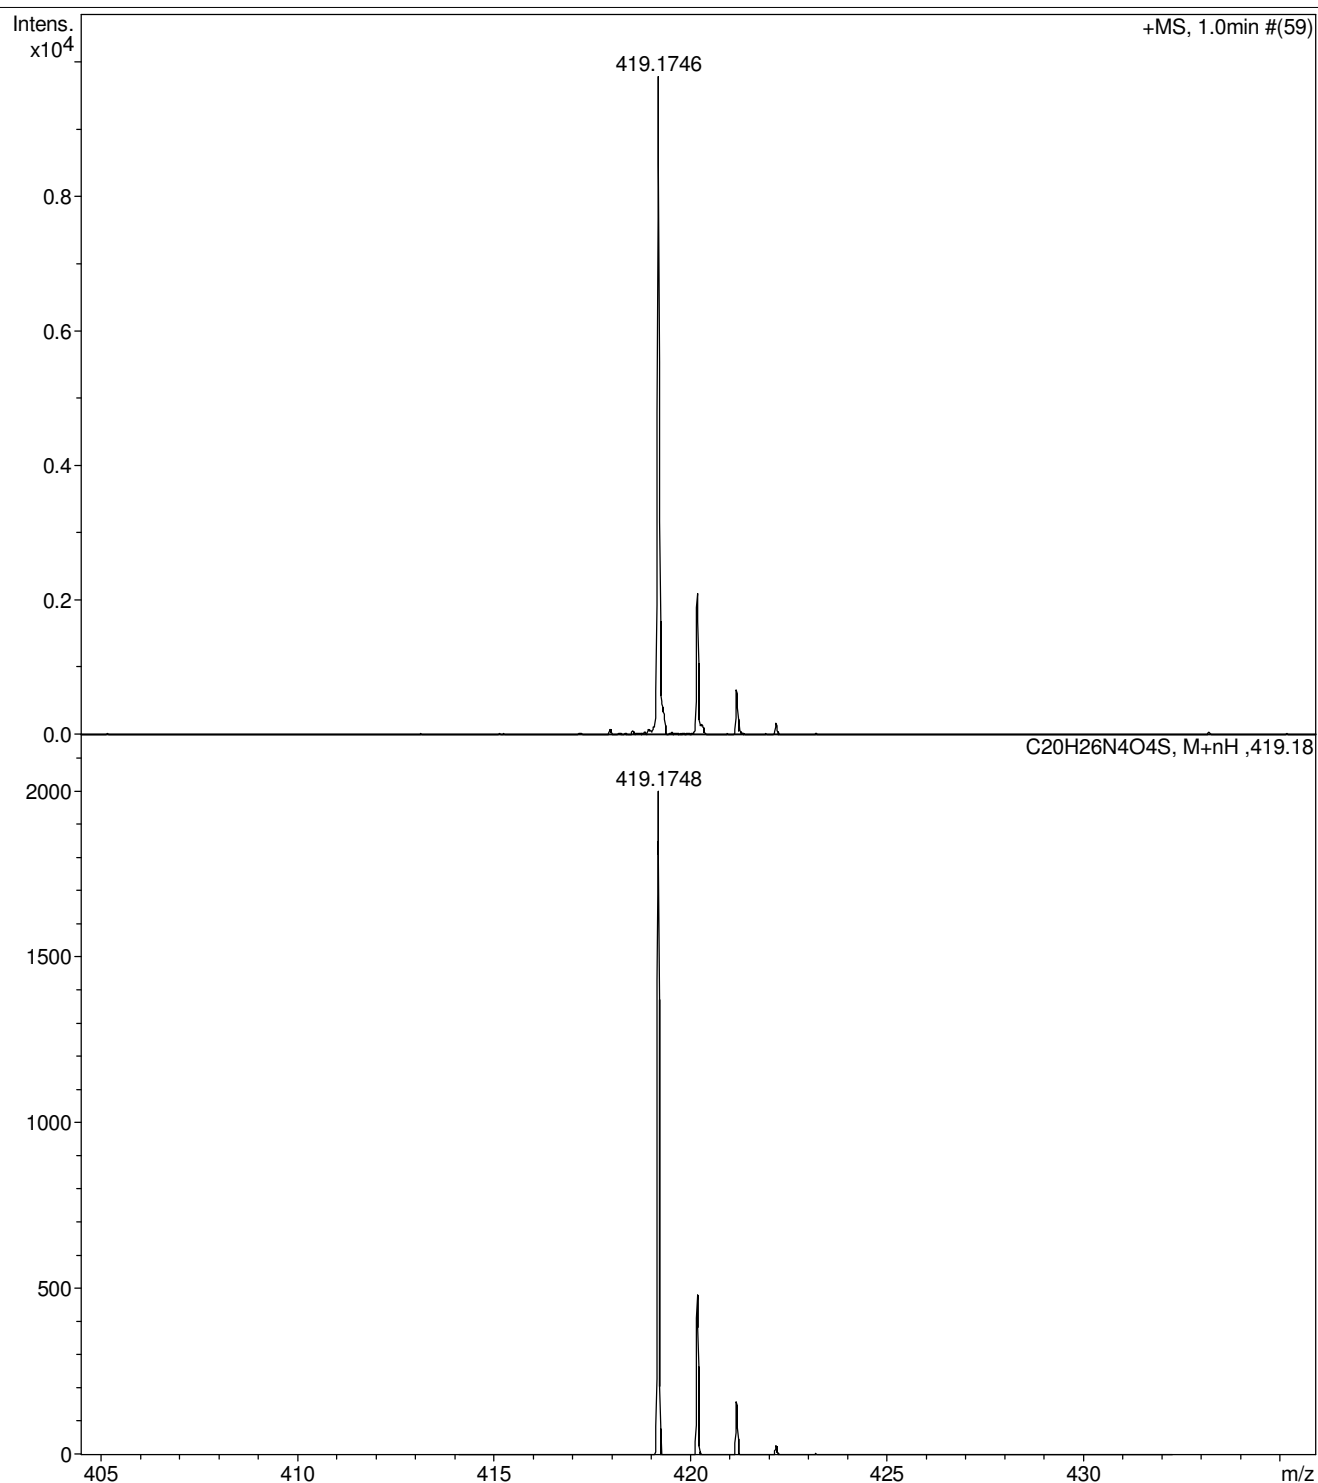





/LPIK AF-432.1.1 Kokorekin-20259

COSY

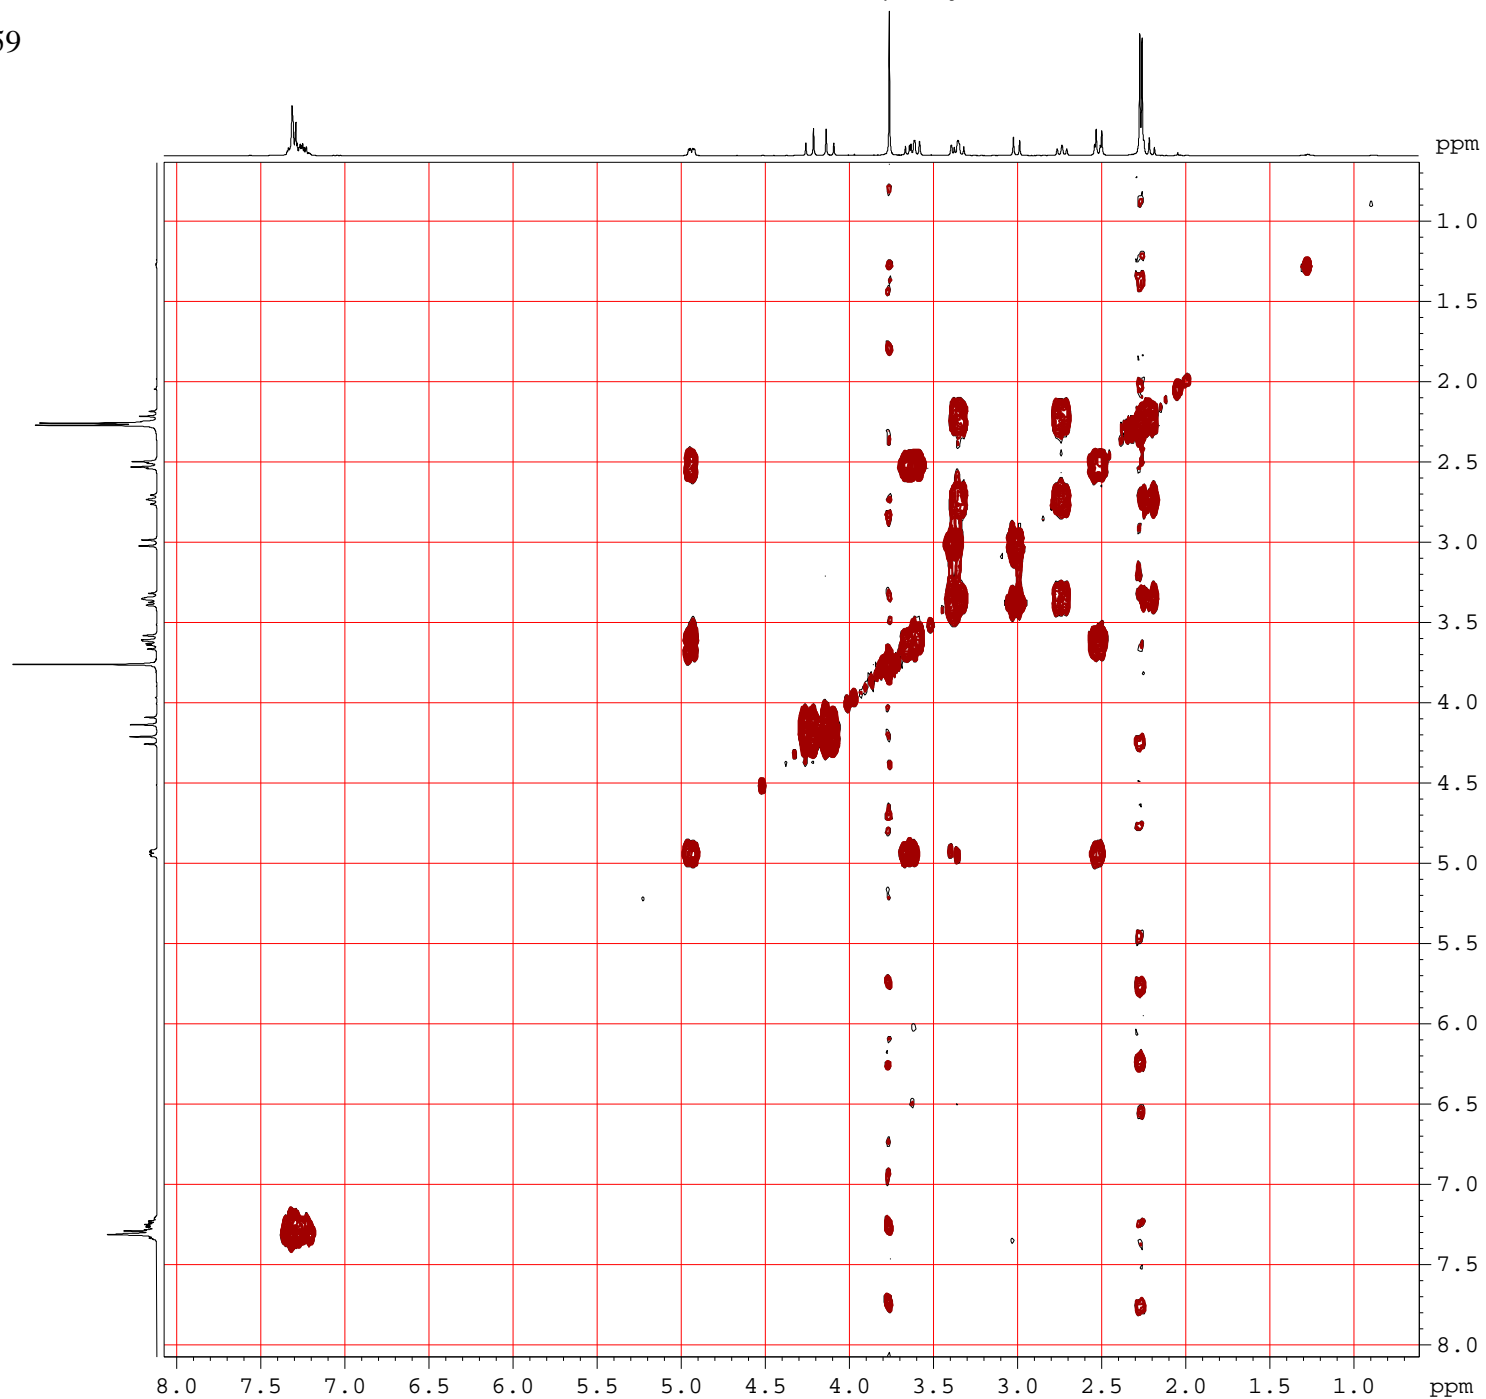



/LPIK AF-432.1.1 Kokorekin-20259

COSY





/LPIK AF-432.1.1 Kokorekin-20259  
HSQC

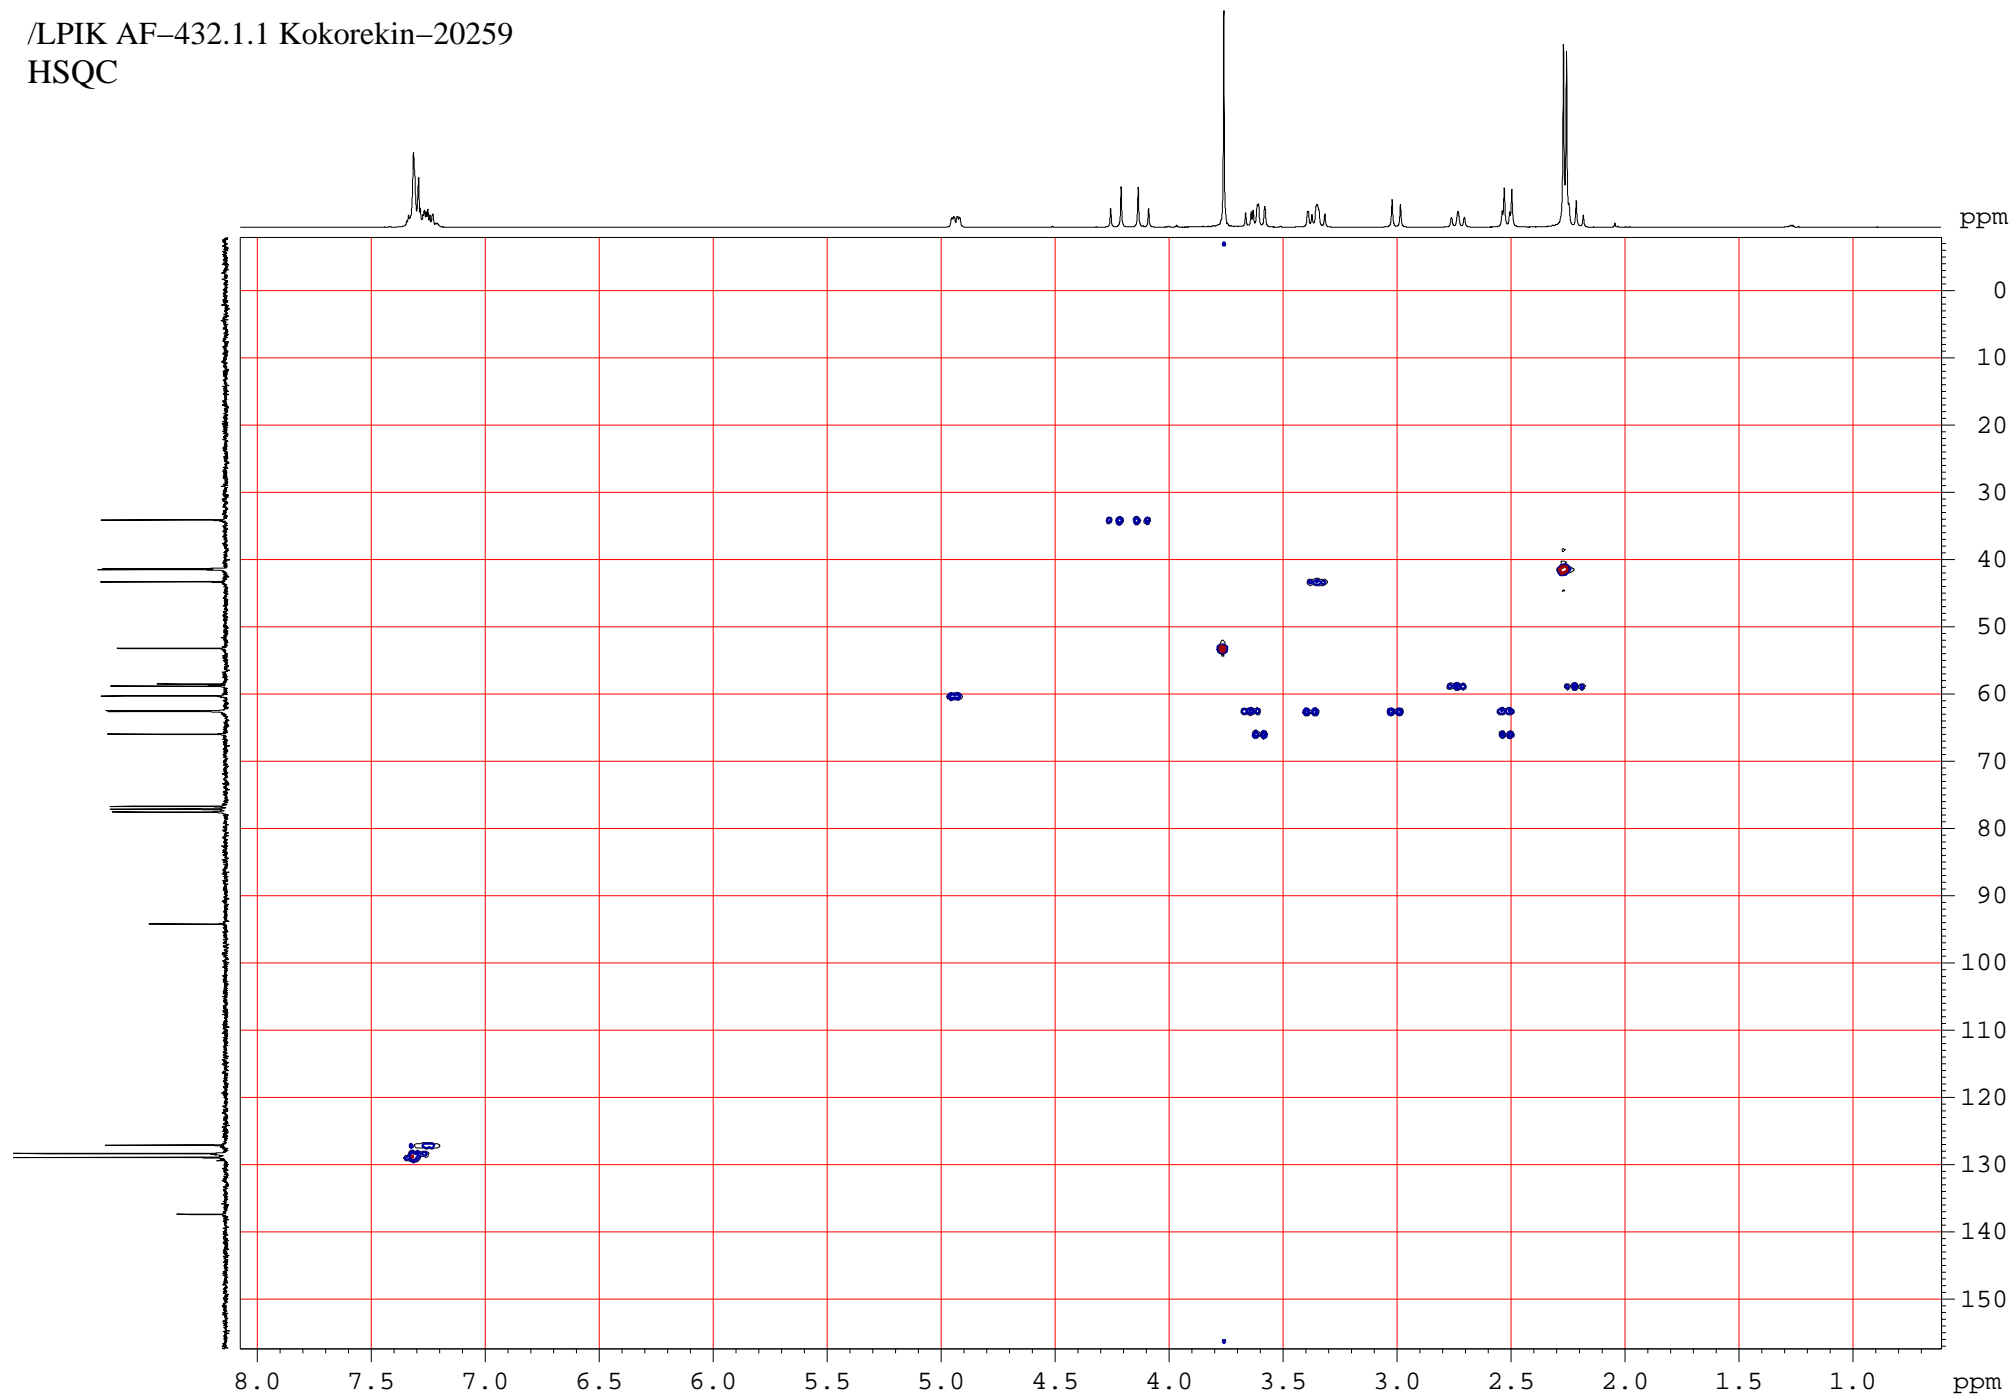



/LPIK AF-432.1.NOESY Kokorekin-20259  
NOESY

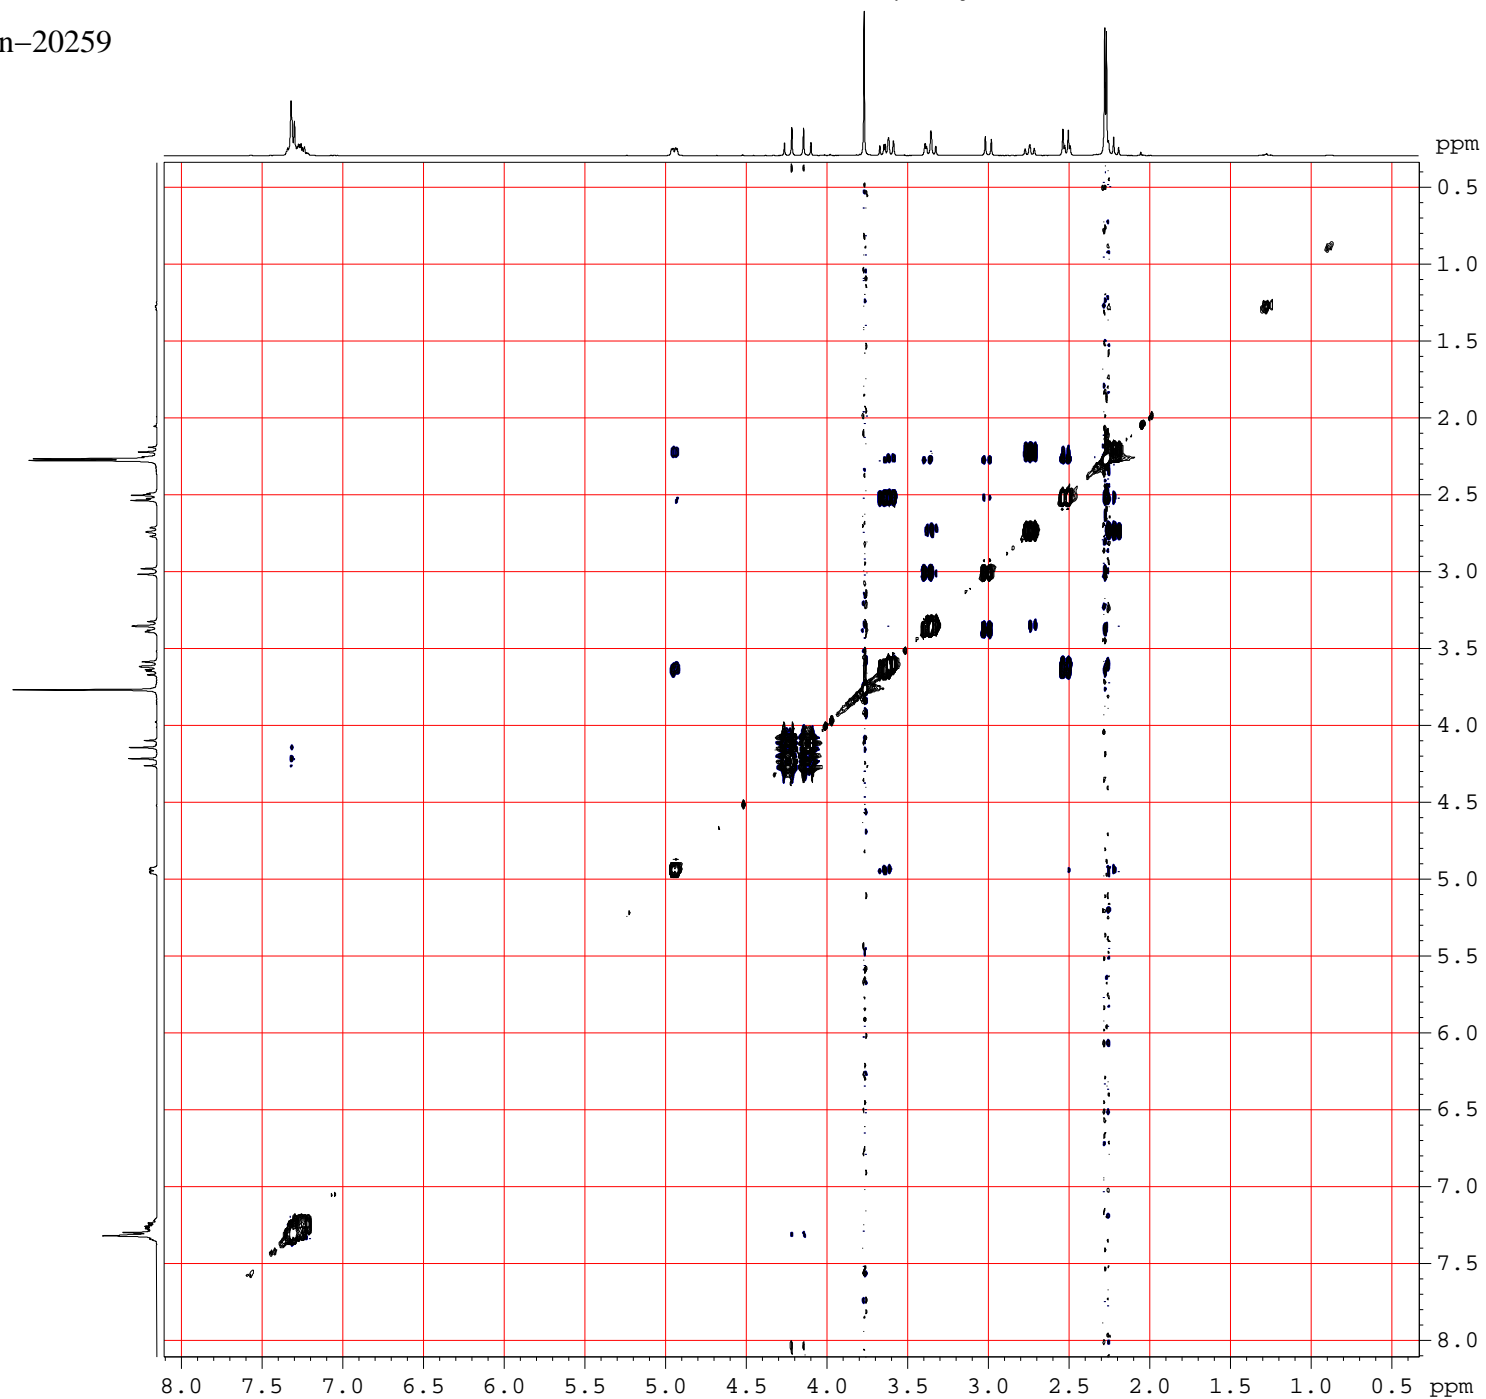

Supplement: s1 [file s1]
